# Supplementary material
Source: PubMed Central journal article supplement (PMC8957635)
Supplement: NIHMS1741890-supplement-Figure_S3.pdf [file NIHMS1741890-supplement-Figure_S3.pdf]

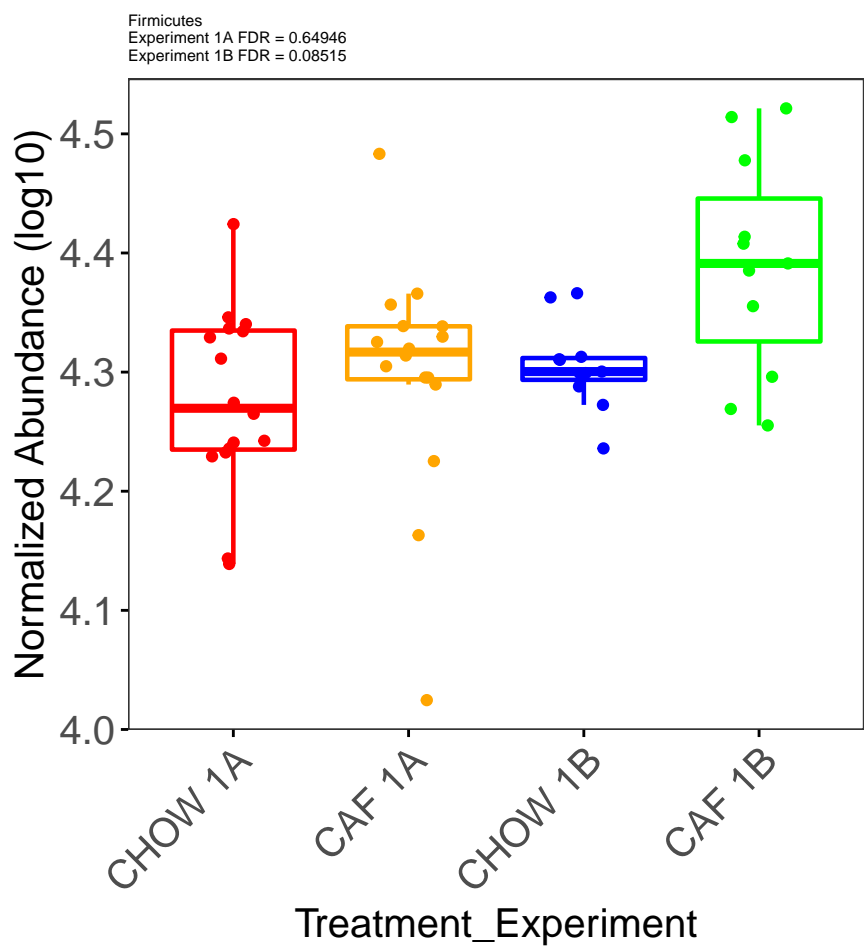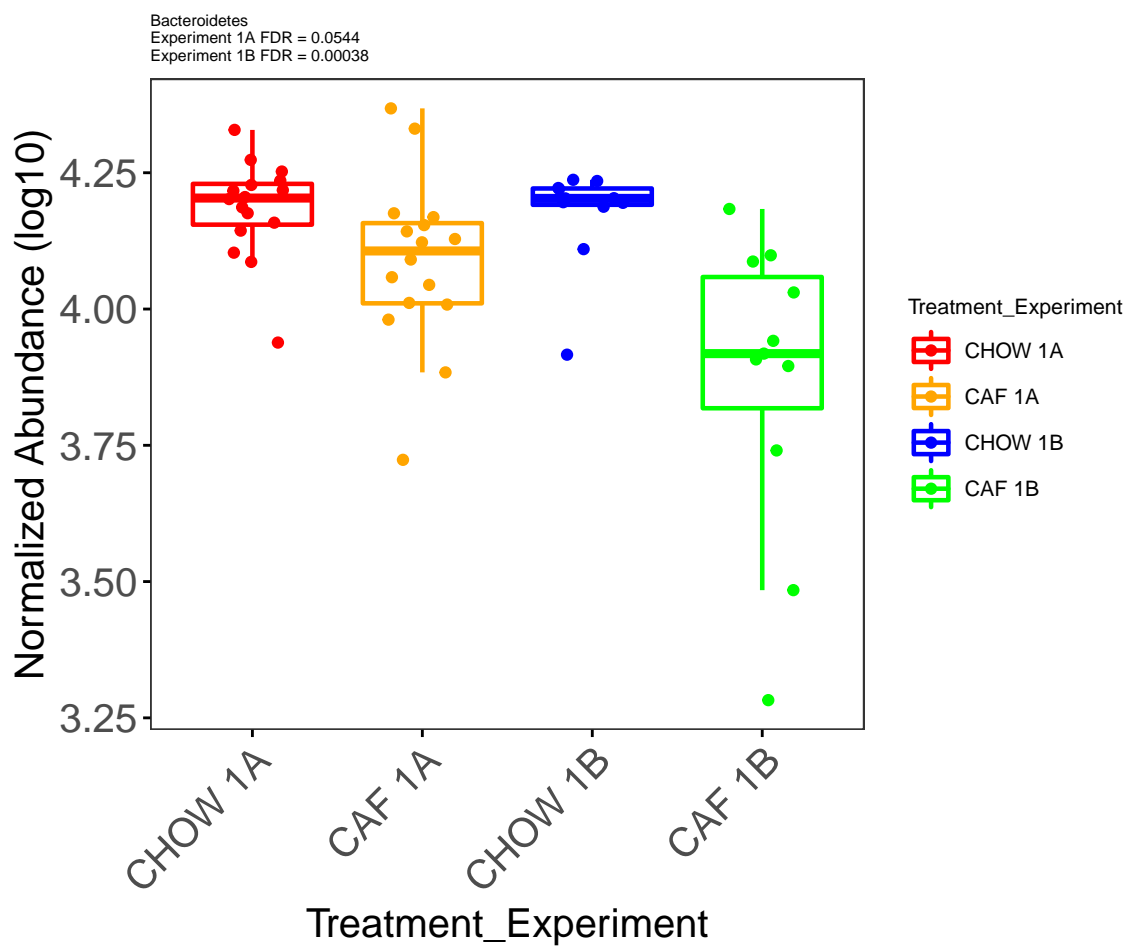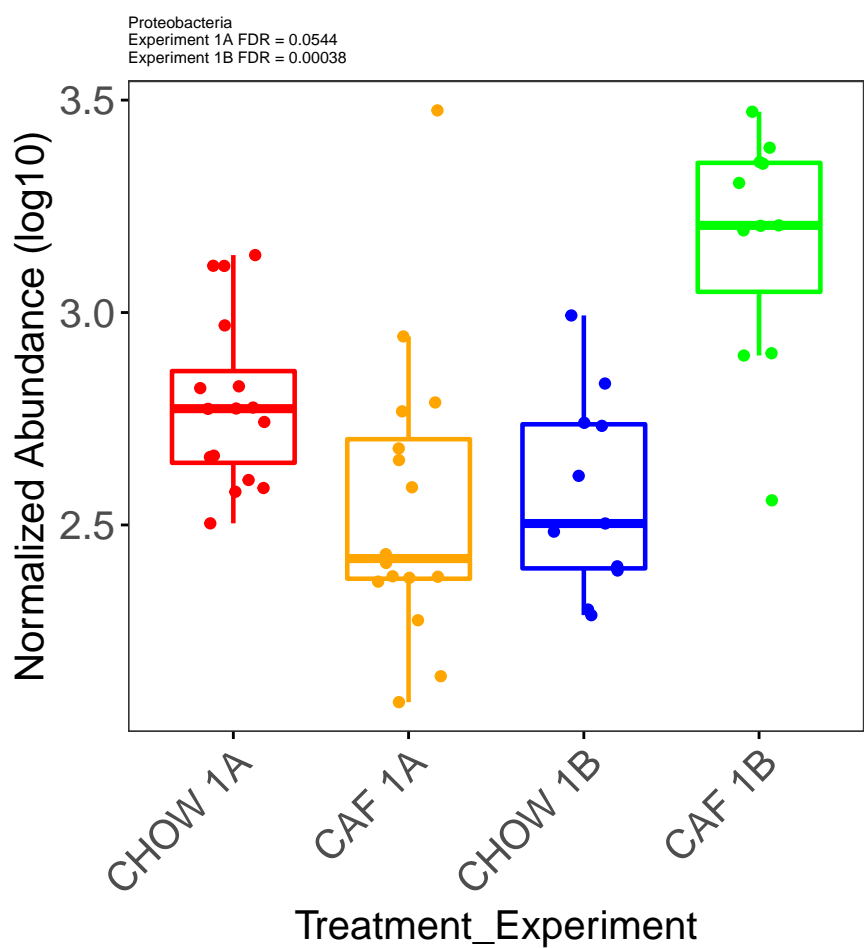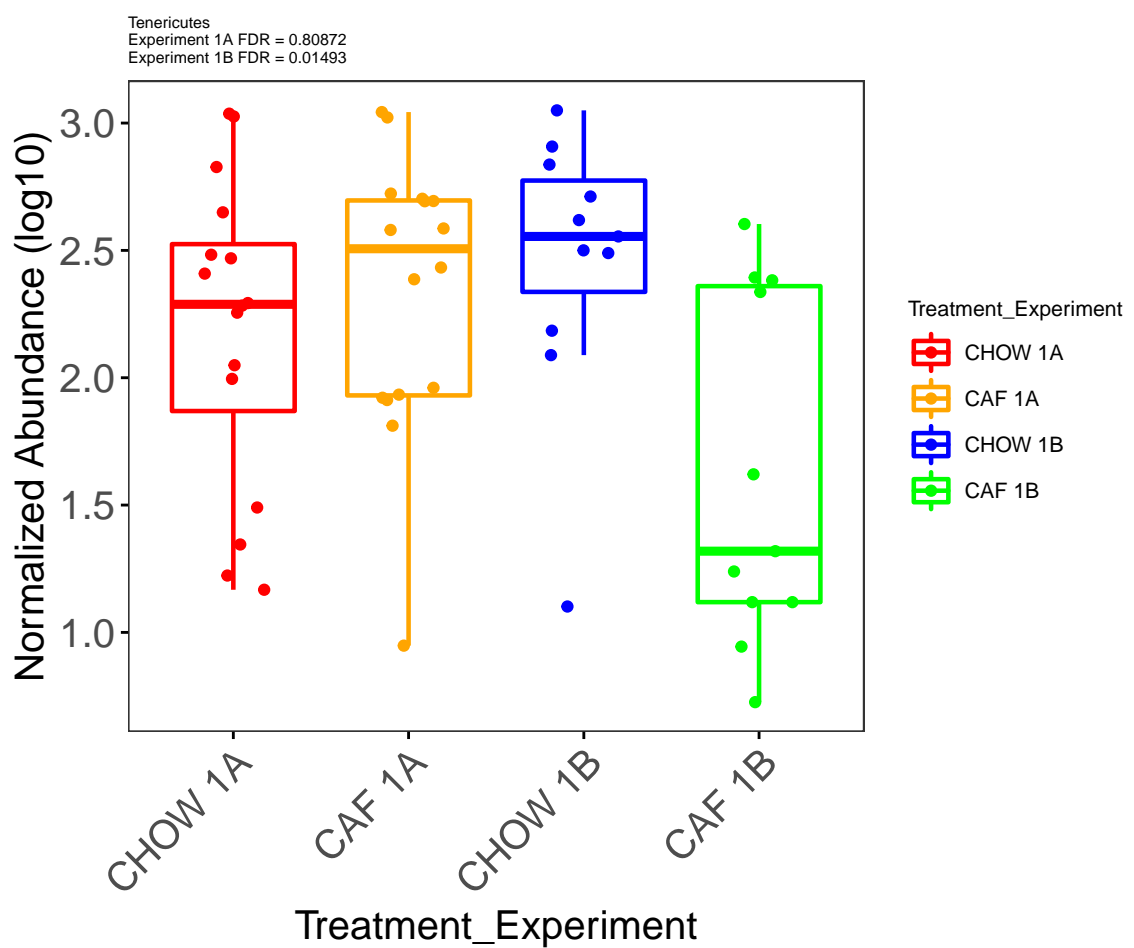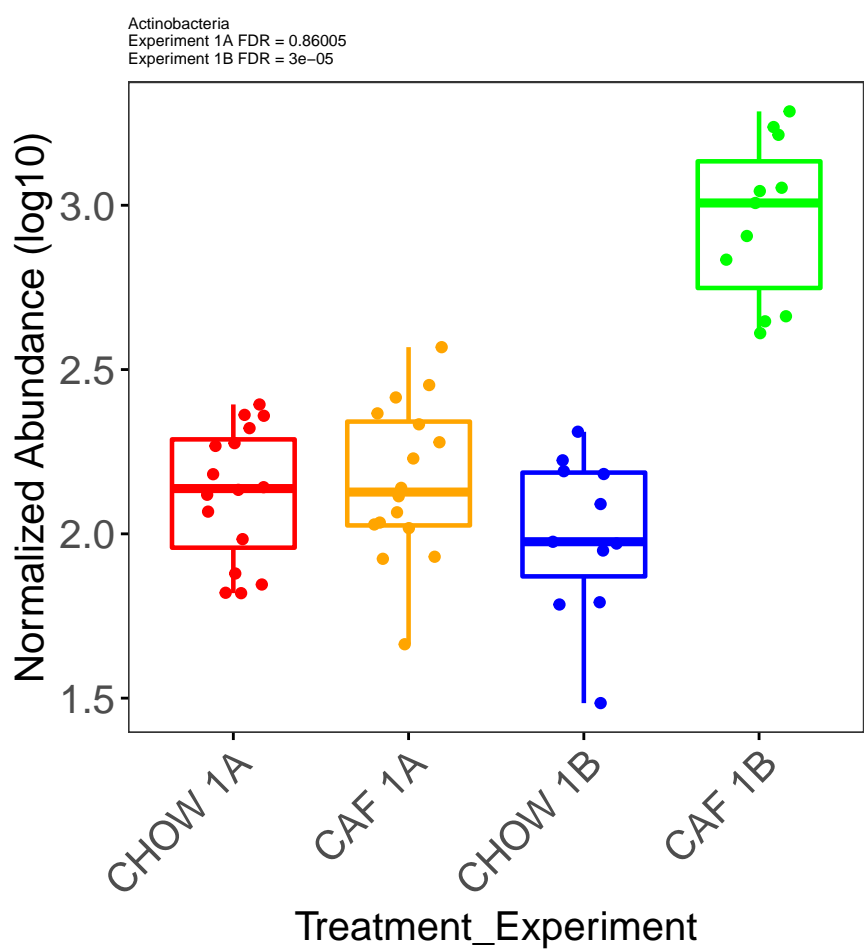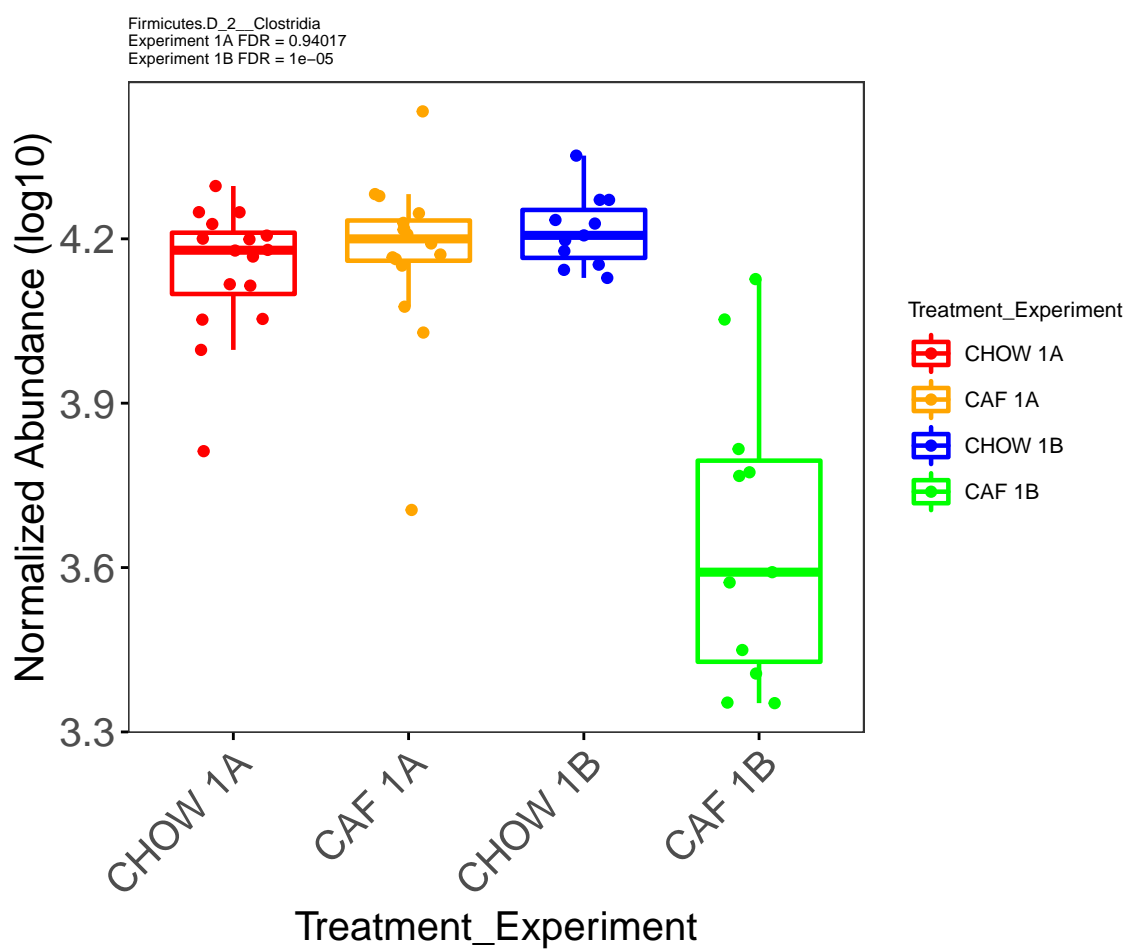

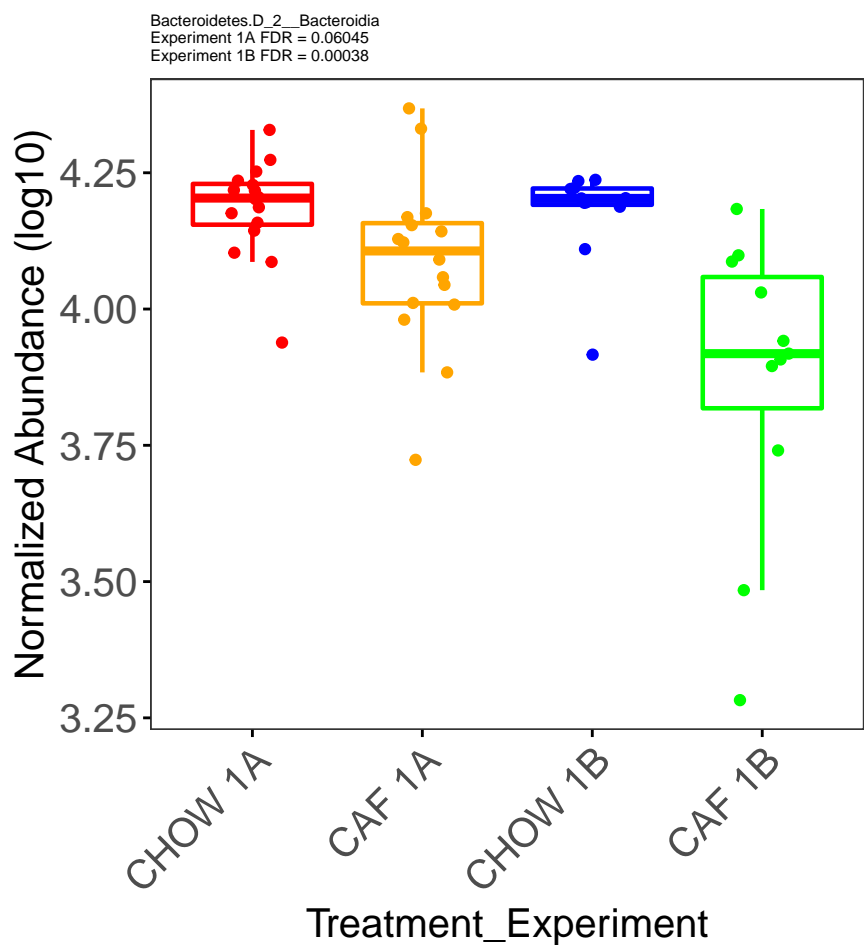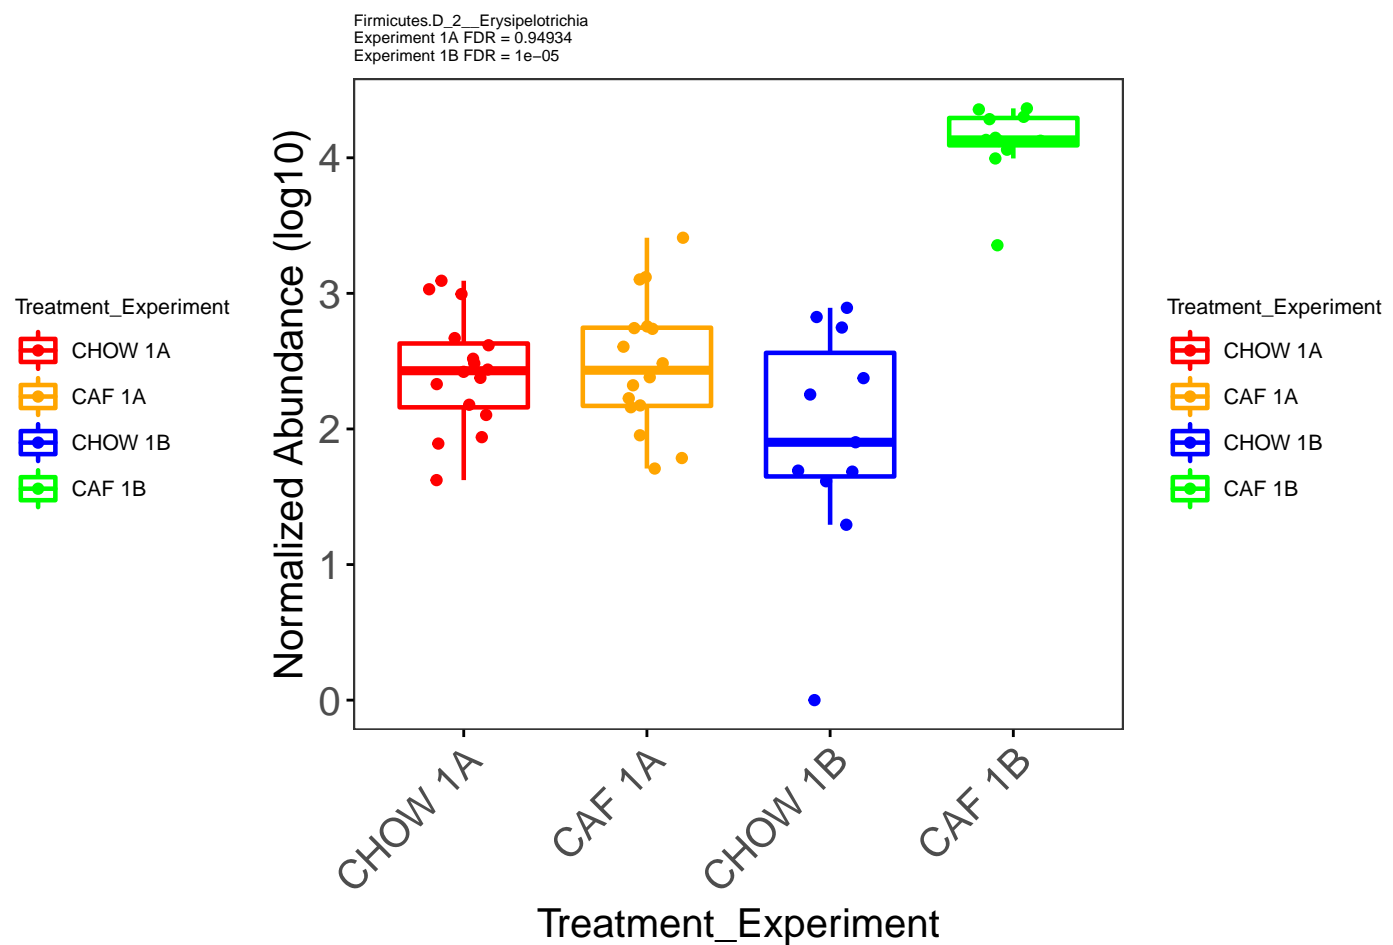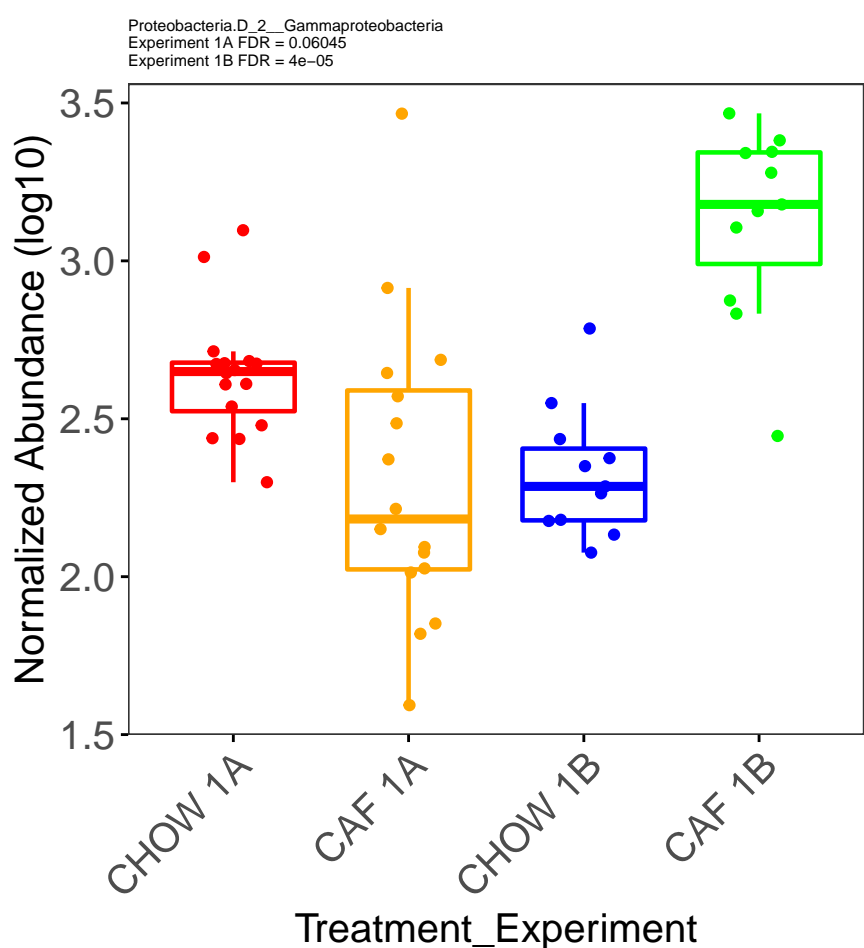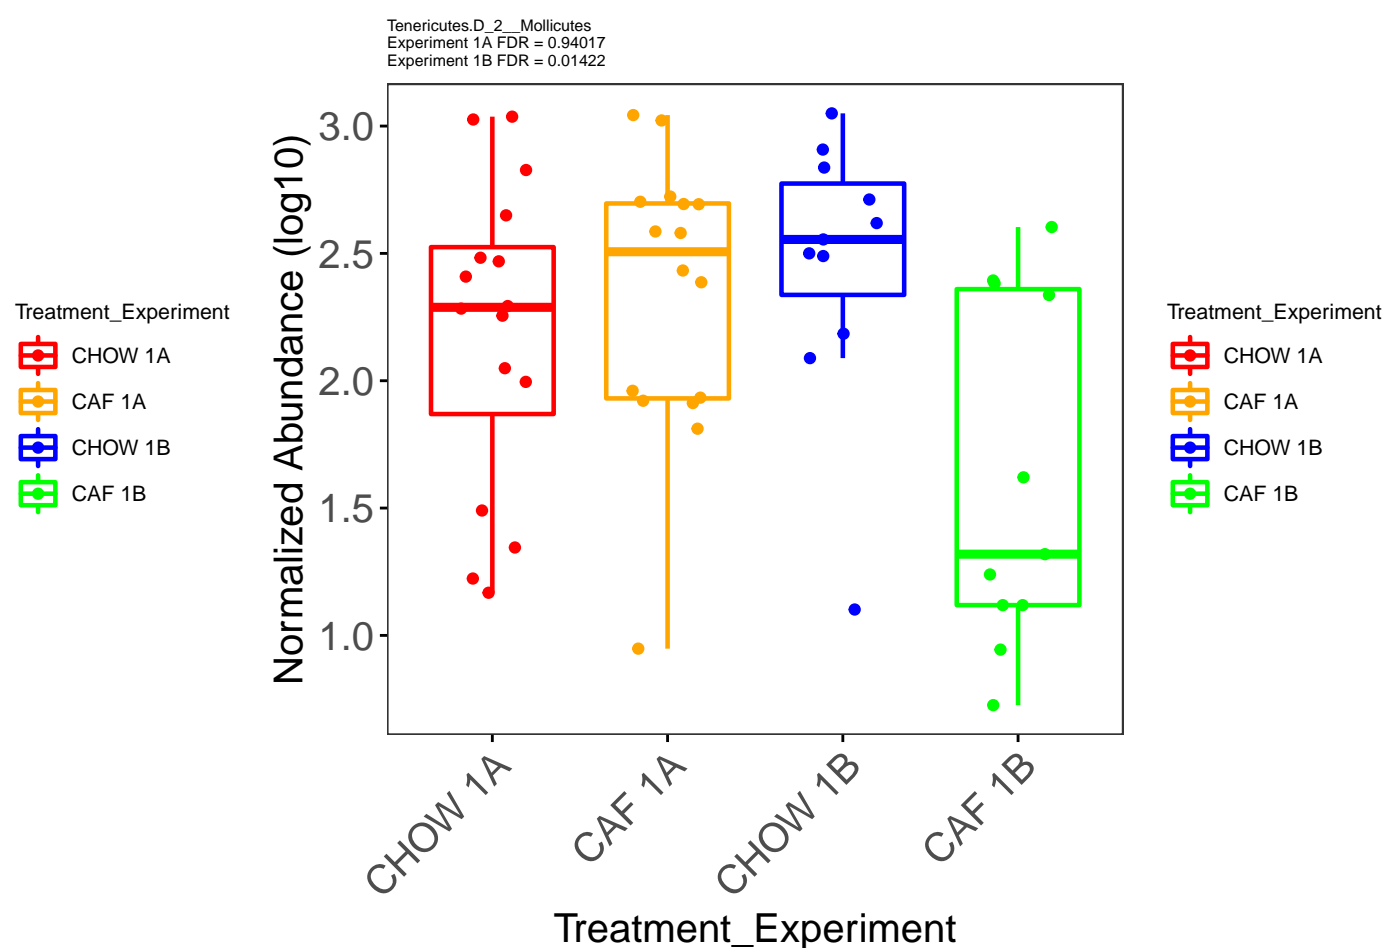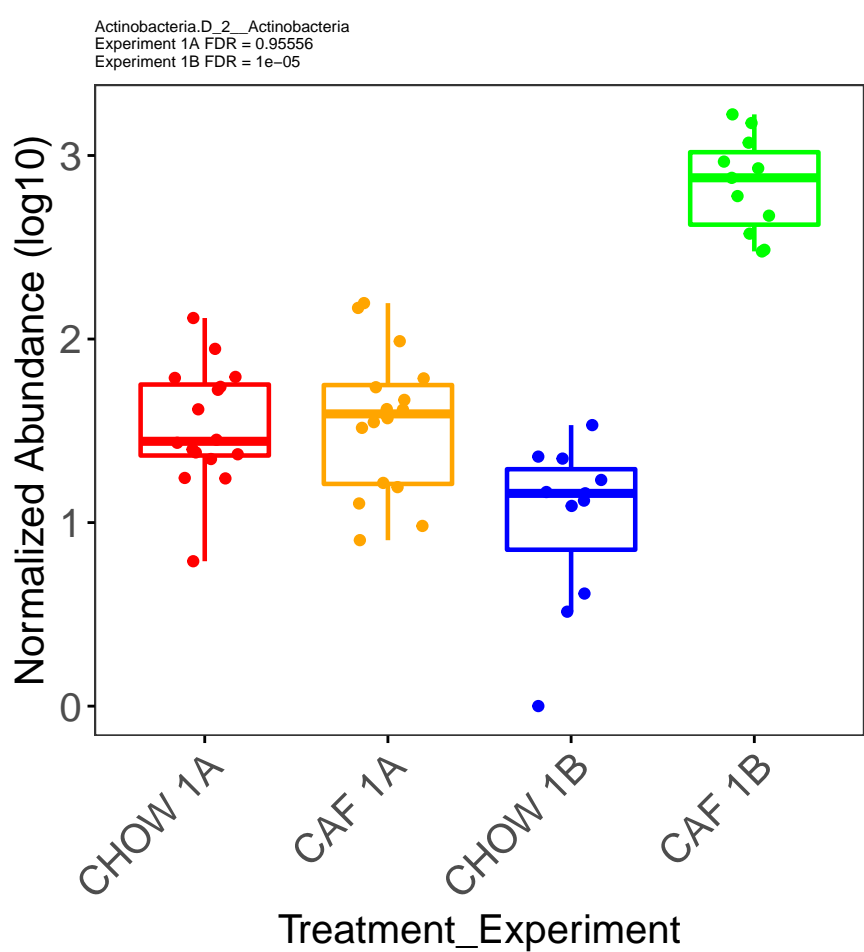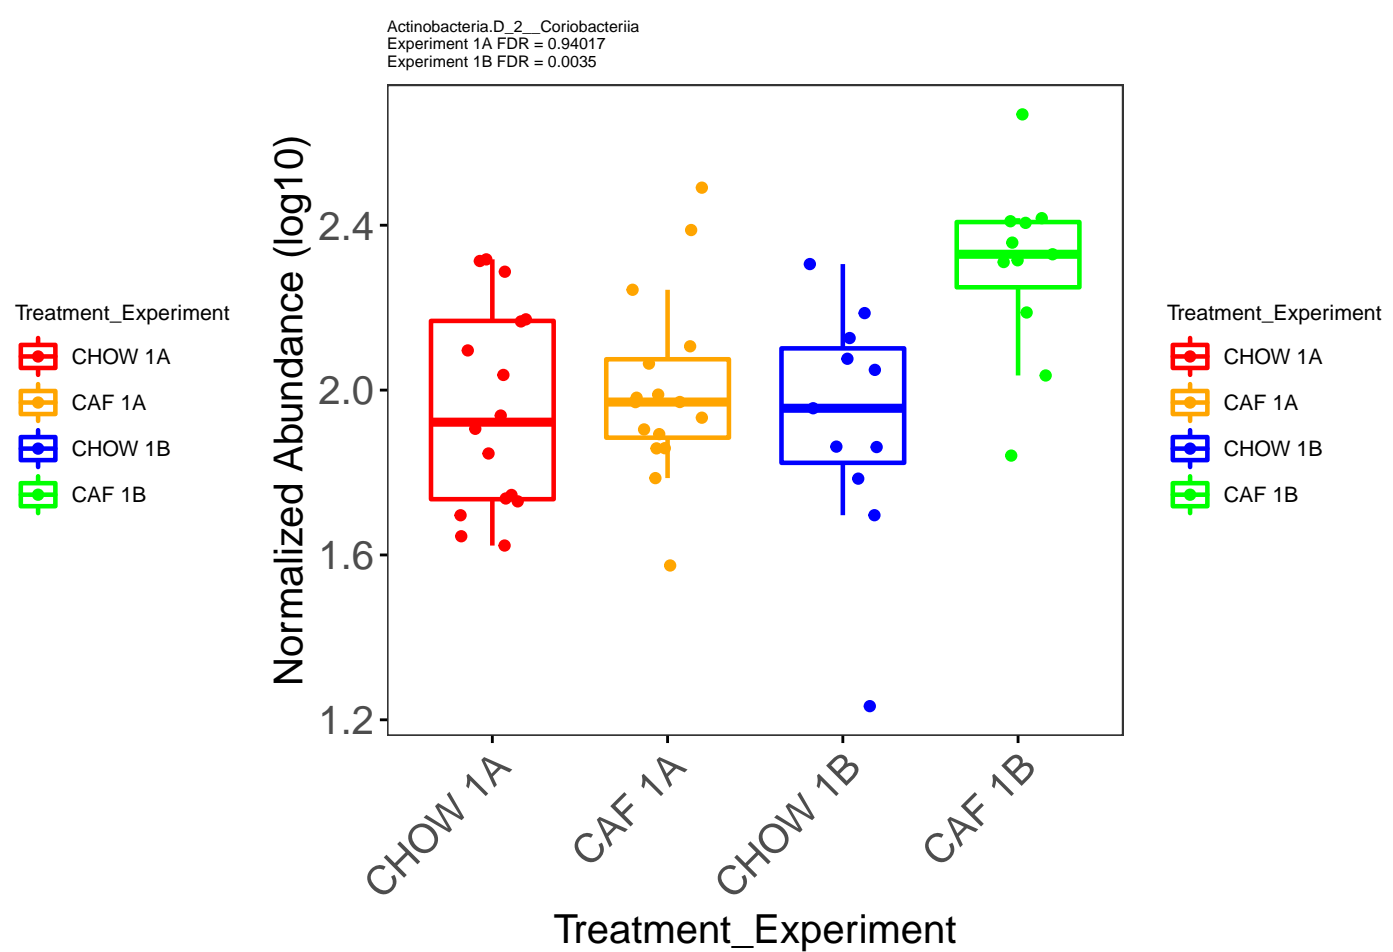

Proteobacteria.D.2\_Deltaproteobacteria  
Experiment 1A FDR = 0.94017  
Experiment 1B FDR = 0.01562

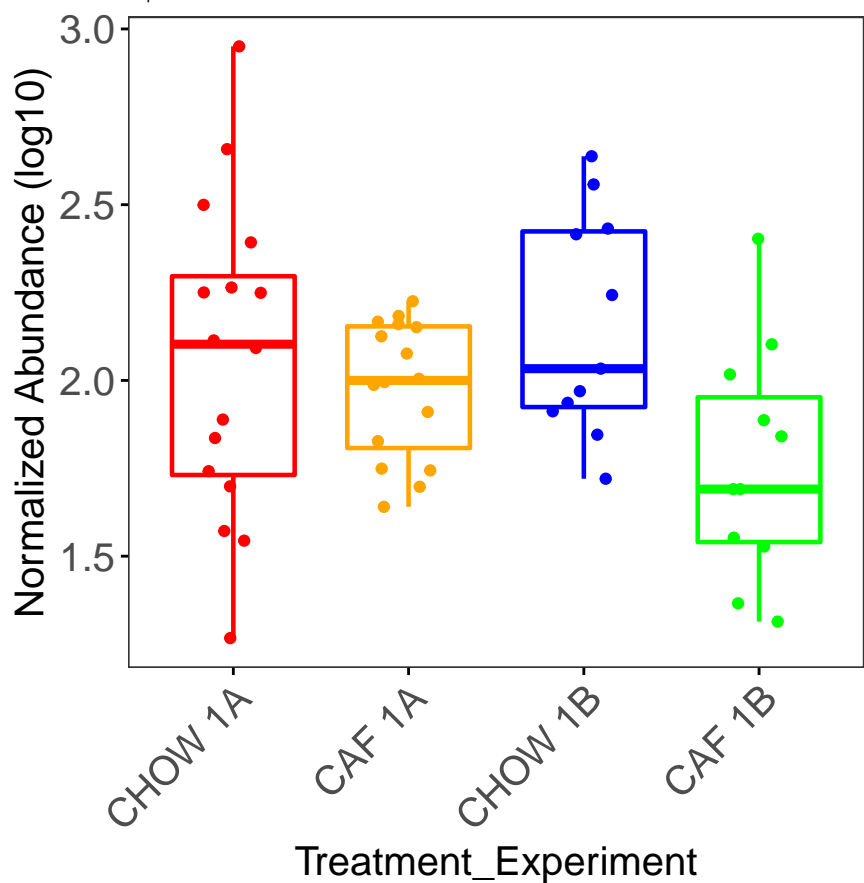

Firmicutes.\_  
Experiment 1A FDR = 0.06016  
Experiment 1B FDR = 0.65769

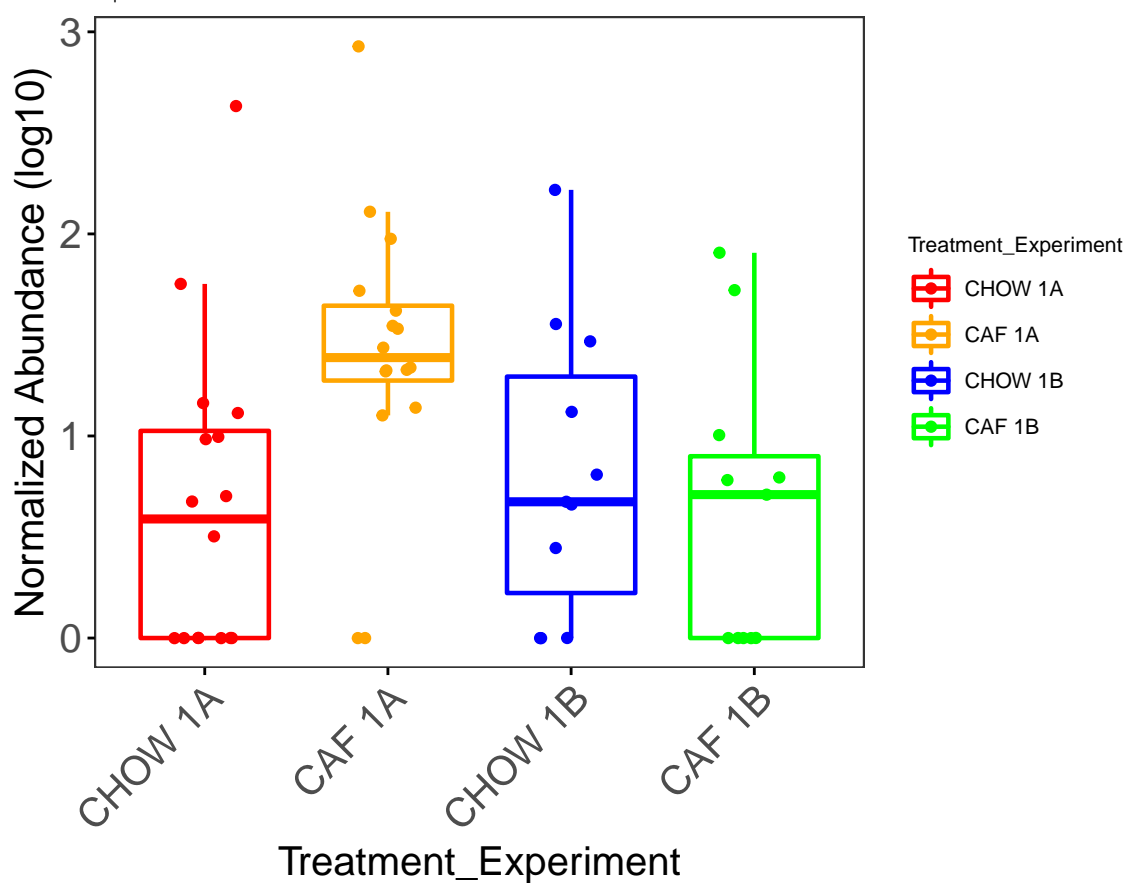

Firmicutes.D.2\_Clostridia.D.3\_Clostridiales  
Experiment 1A FDR = 0.79648  
Experiment 1B FDR = 3e-05

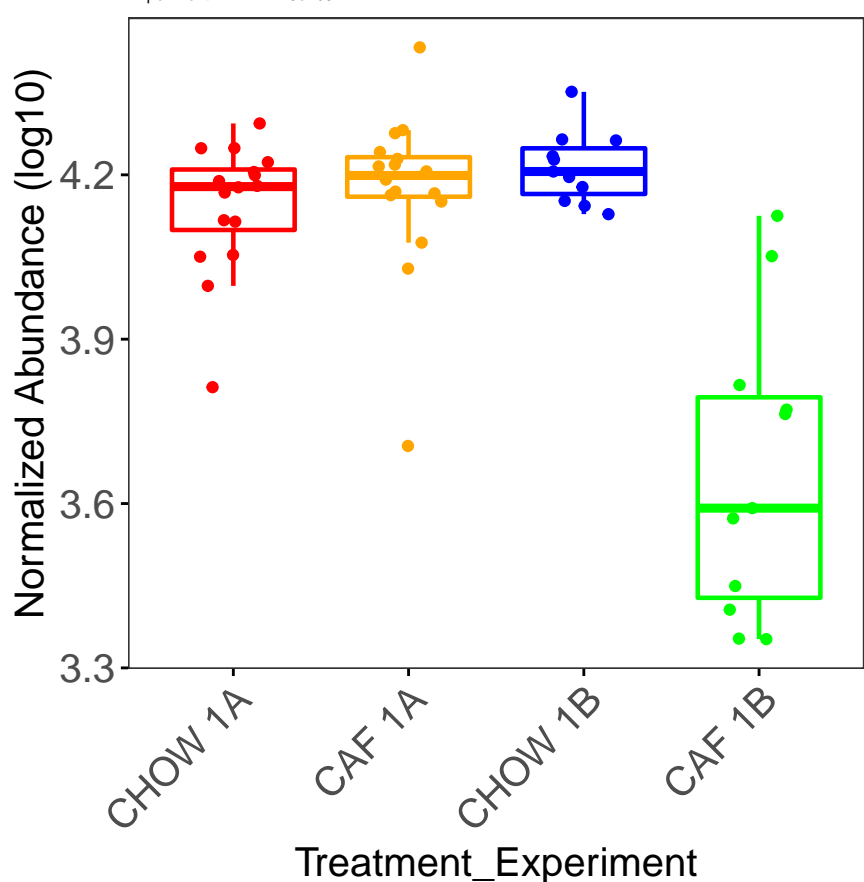

Bacteroidetes.D.2\_Bacteroidia.D.3\_Bacteroidales  
Experiment 1A FDR = 0.10397  
Experiment 1B FDR = 0.00059

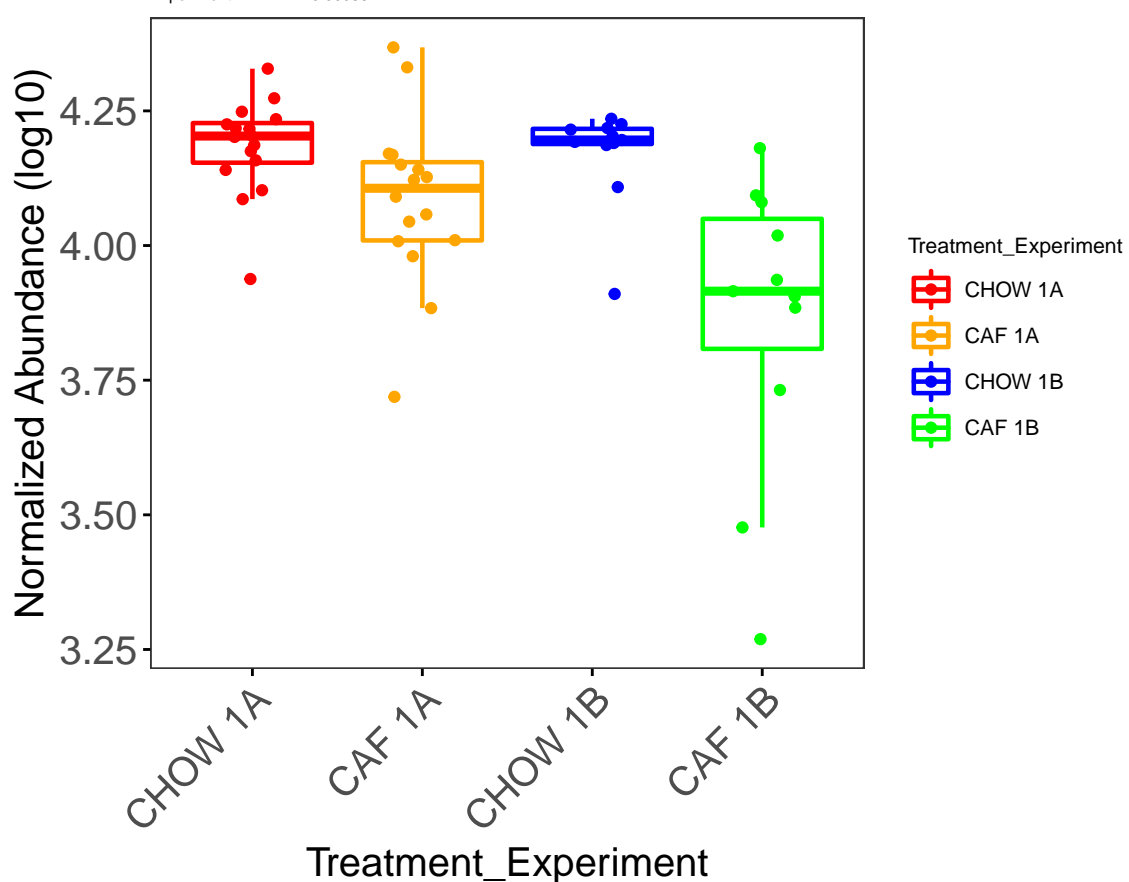

Firmicutes.D.2\_Erysipelotrichia.D.3\_Erysipelotrichales  
Experiment 1A FDR = 0.86662  
Experiment 1B FDR = 3e-05

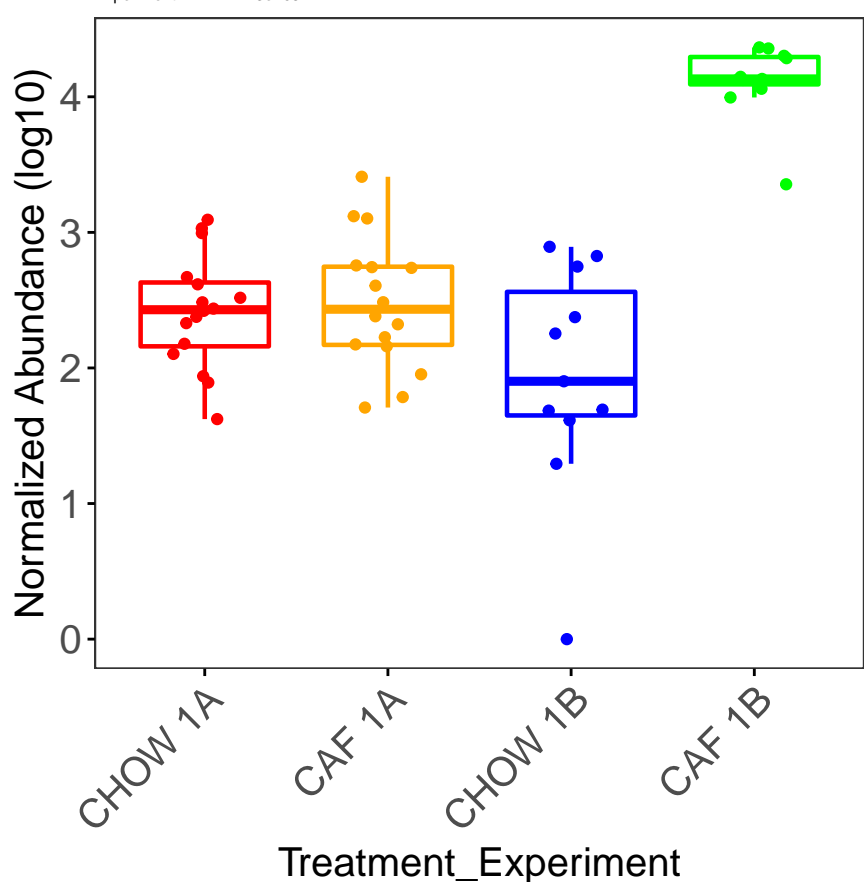

Proteobacteria.D.2\_Gammaproteobacteria.D.3\_Betaproteobacteriales  
Experiment 1A FDR = 0.10397  
Experiment 1B FDR = 9e-05

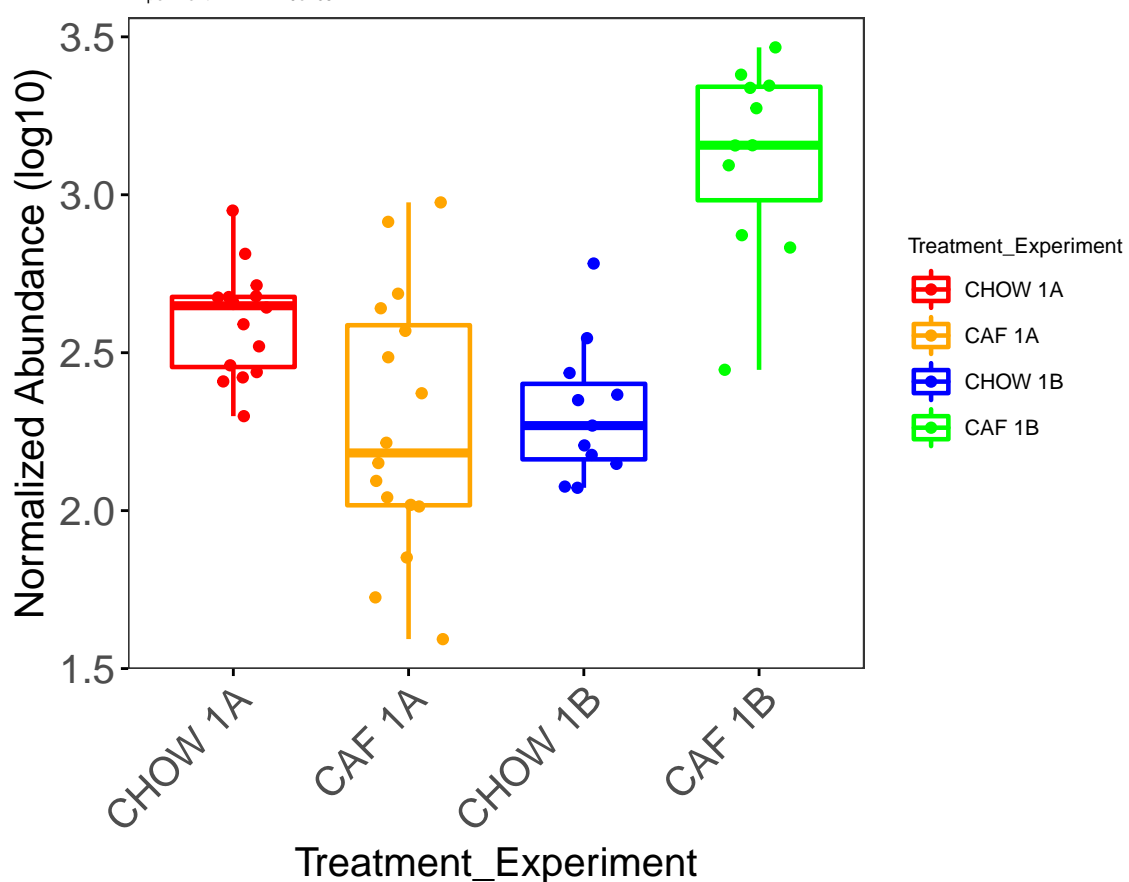

Tenericutes.D.2\_\_Mollicutes.D.3\_\_Mollicutes RF39  
Experiment 1A FDR = 0.79767  
Experiment 1B FDR = 0.01348

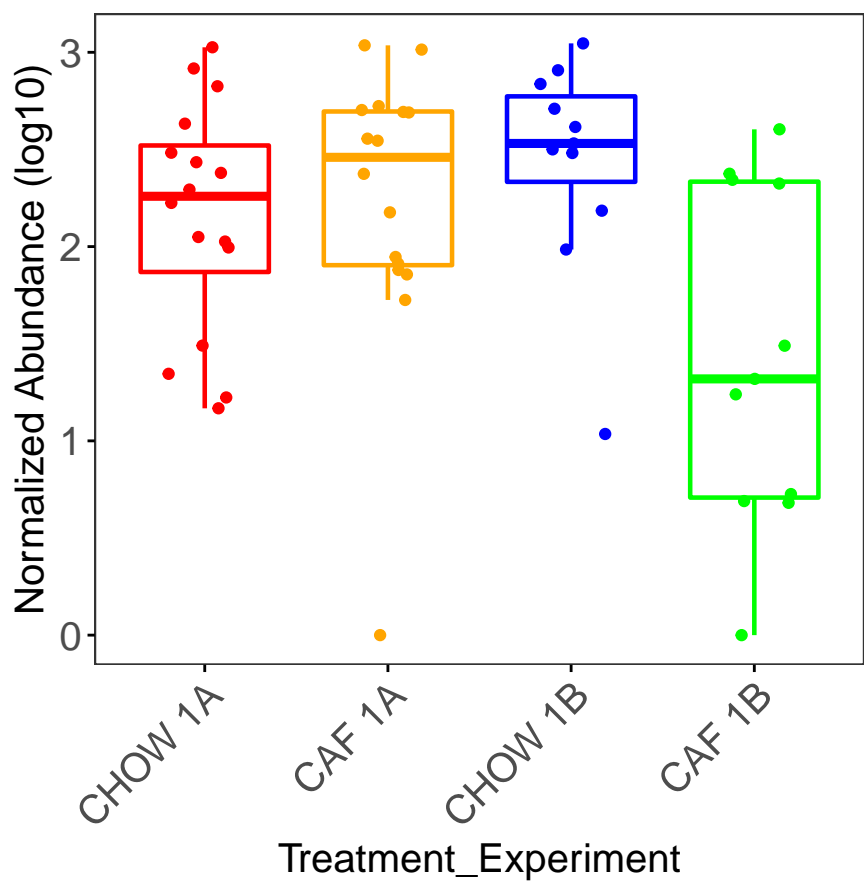

Treatment\_Experiment  
CHOW 1A  
CAF 1A  
CHOW 1B  
CAF 1B

Actinobacteria.D.2\_\_Actinobacteria.D.3\_\_Bifidobacteriales  
Experiment 1A FDR = 0.79648  
Experiment 1B FDR = 4e-04

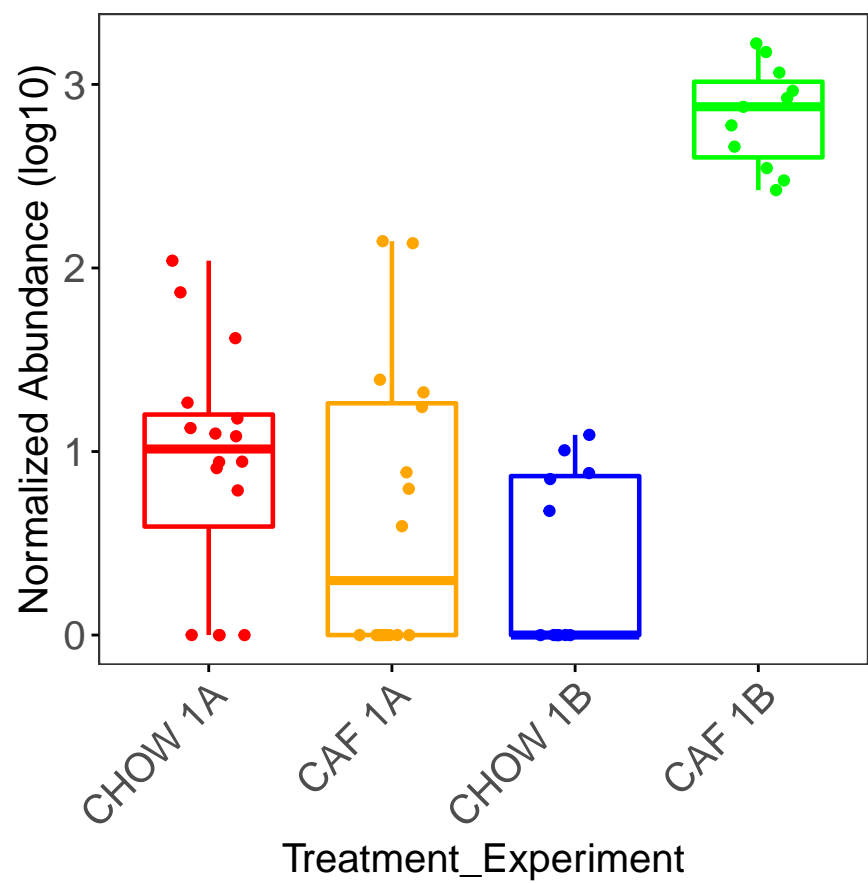

Treatment\_Experiment  
CHOW 1A  
CAF 1A  
CHOW 1B  
CAF 1B

Actinobacteria.D.2\_\_Coriobacterii.D.3\_\_Coriobacteriales  
Experiment 1A FDR = 0.79767  
Experiment 1B FDR = 0.00537

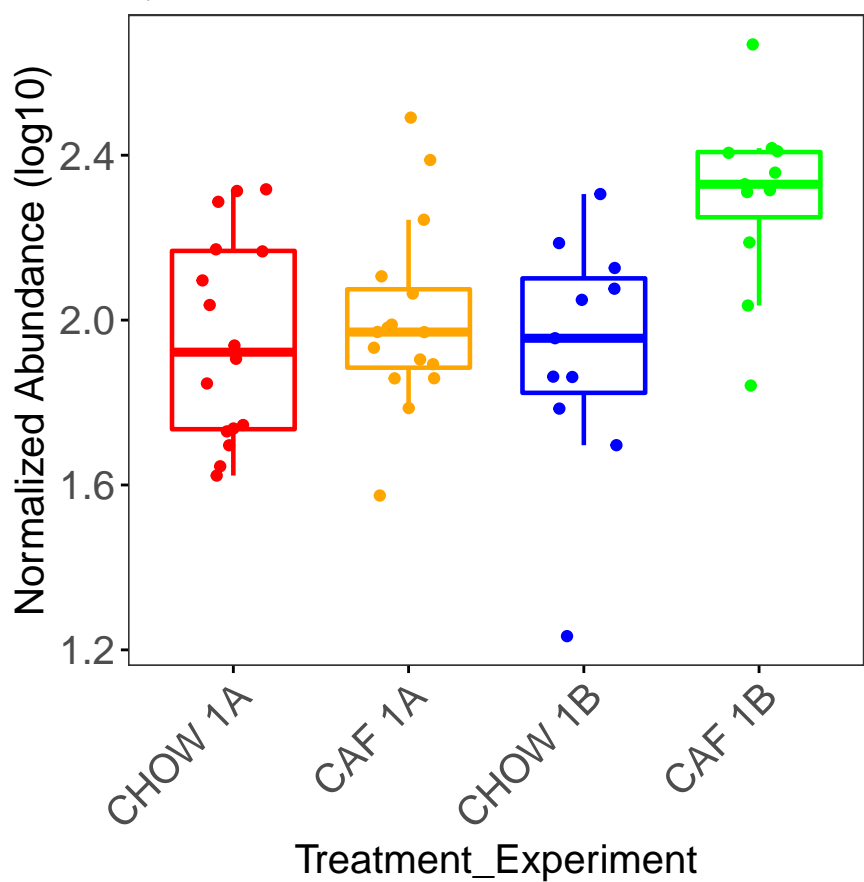

Treatment\_Experiment  
CHOW 1A  
CAF 1A  
CHOW 1B  
CAF 1B

Proteobacteria.D.2\_\_Deltaproteobacteria.D.3\_\_Desulfovibrionales  
Experiment 1A FDR = 0.79648  
Experiment 1B FDR = 0.02395

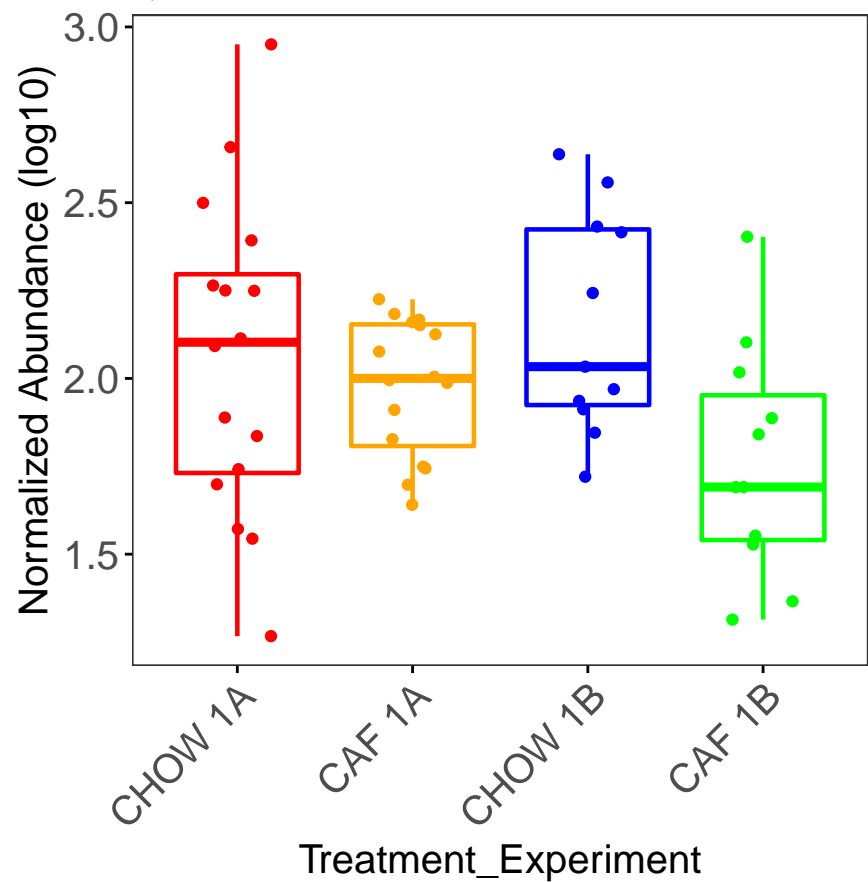

Treatment\_Experiment  
CHOW 1A  
CAF 1A  
CHOW 1B  
CAF 1B

Firmicutes\_\_\_\_\_  
Experiment 1A FDR = 0.09224  
Experiment 1B FDR = 0.70592

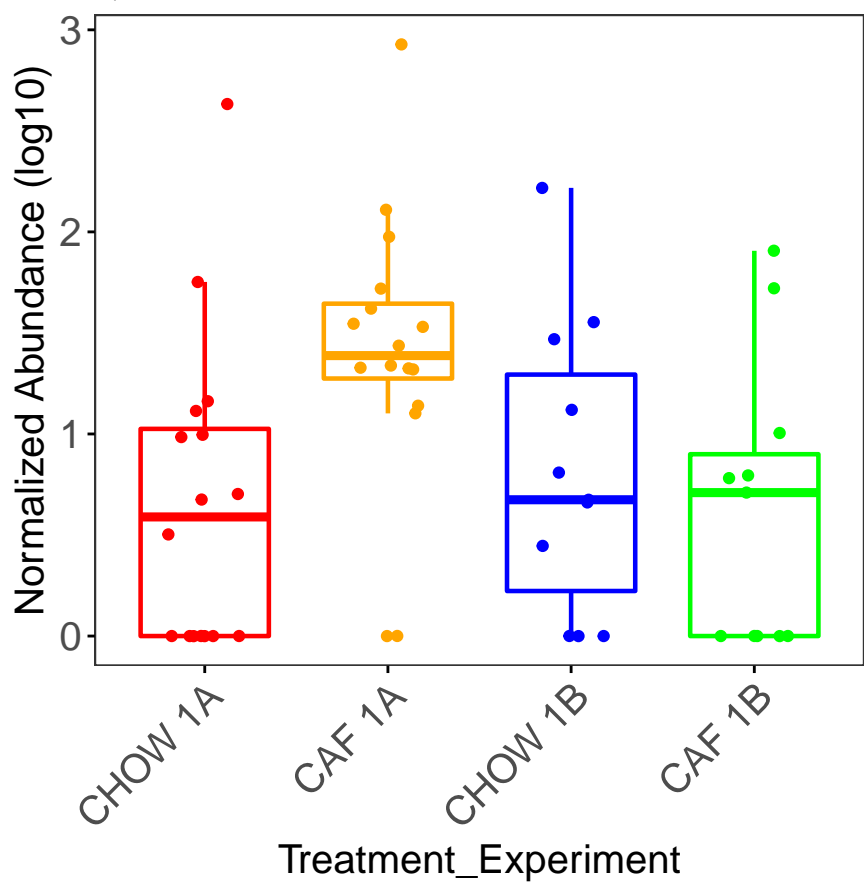

Treatment\_Experiment  
CHOW 1A  
CAF 1A  
CHOW 1B  
CAF 1B

Firmicutes.D.2\_\_Clostridia.D.3\_\_Clostridiales.D.4\_\_Ruminococcaceae  
Experiment 1A FDR = 0.63362  
Experiment 1B FDR = 0.00014

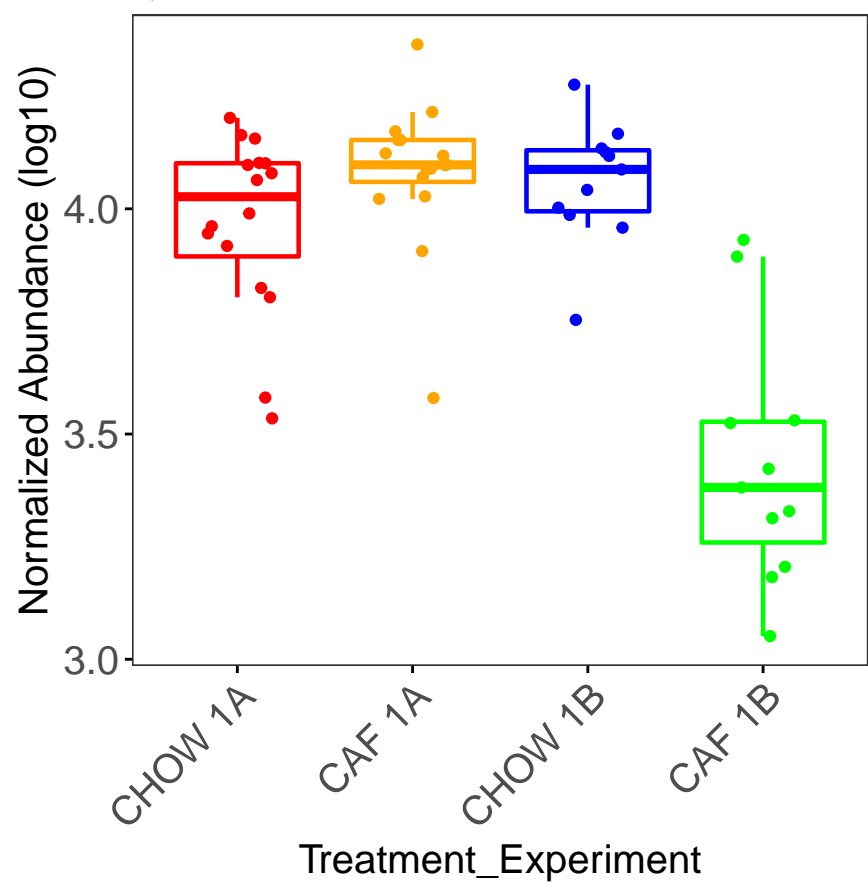

Treatment\_Experiment  
CHOW 1A  
CAF 1A  
CHOW 1B  
CAF 1B

Bacteroidetes.D.2\_\_Bacteroidia.D.3\_\_Bacteroidales.D.4\_\_Muribaculaceae  
Experiment 1A FDR = 0.97188  
Experiment 1B FDR = 0.00357

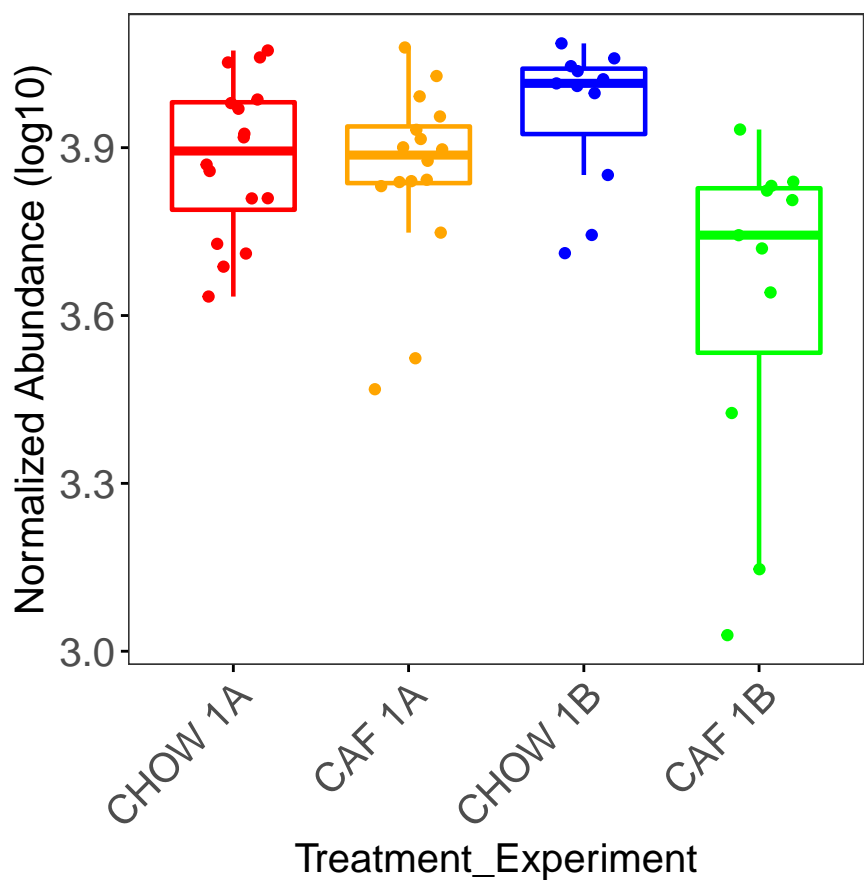

Firmicutes.D.2\_\_Clostridia.D.3\_\_Clostridiales.D.4\_\_Lachnospiraceae  
Experiment 1A FDR = 0.46001  
Experiment 1B FDR = 0.00734

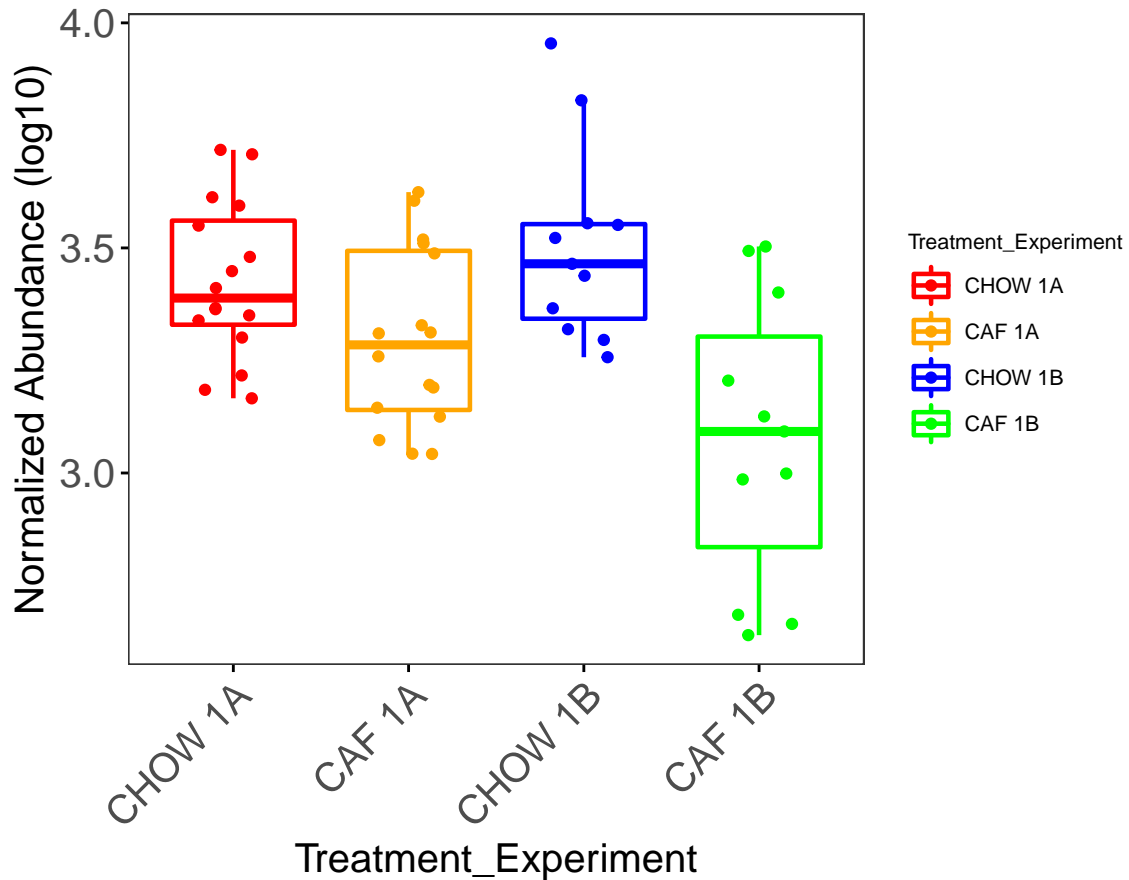

Firmicutes.D.2\_\_Erysipelotrichia.D.3\_\_Erysipelotrichales.D.4\_\_Erysipelotrichaceae  
Experiment 1A FDR = 0.9653  
Experiment 1B FDR = 7e-05

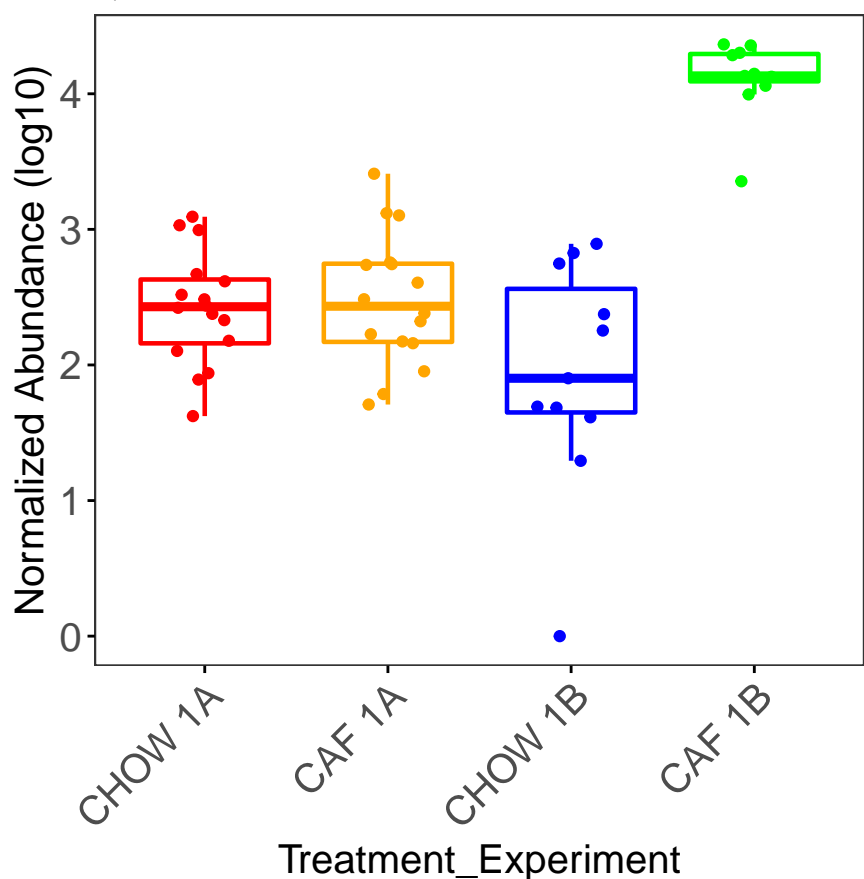

Bacteroidetes.D.2\_\_Bacteroidia.D.3\_\_Bacteroidales.\_\_\_  
Experiment 1A FDR = 0.67159  
Experiment 1B FDR = 0.02934

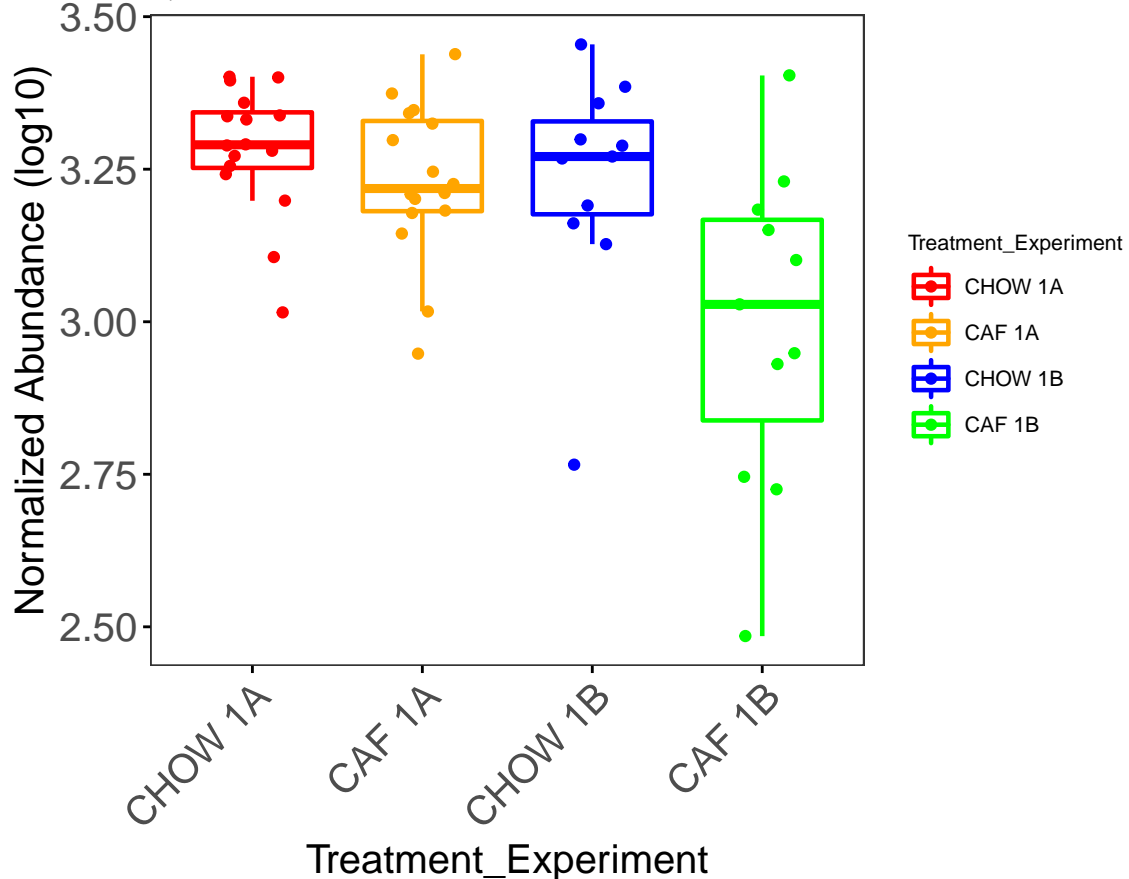

Bacteroidetes.D.2\_\_Bacteroidia.D.3\_\_Bacteroidales.D.4\_\_Prevotellaceae  
Experiment 1A FDR = 0.67159  
Experiment 1B FDR = 7e-05

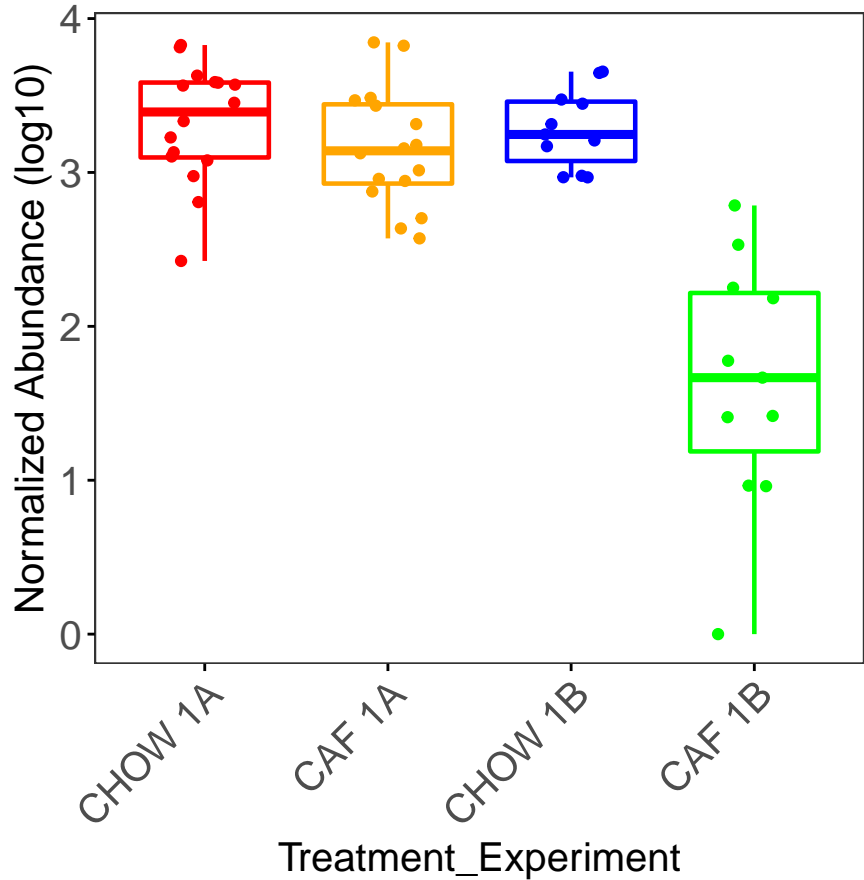

Firmicutes.D.2\_\_Clostridia.D.3\_\_Clostridiales.\_\_\_  
Experiment 1A FDR = 0.00549  
Experiment 1B FDR = 0.02104

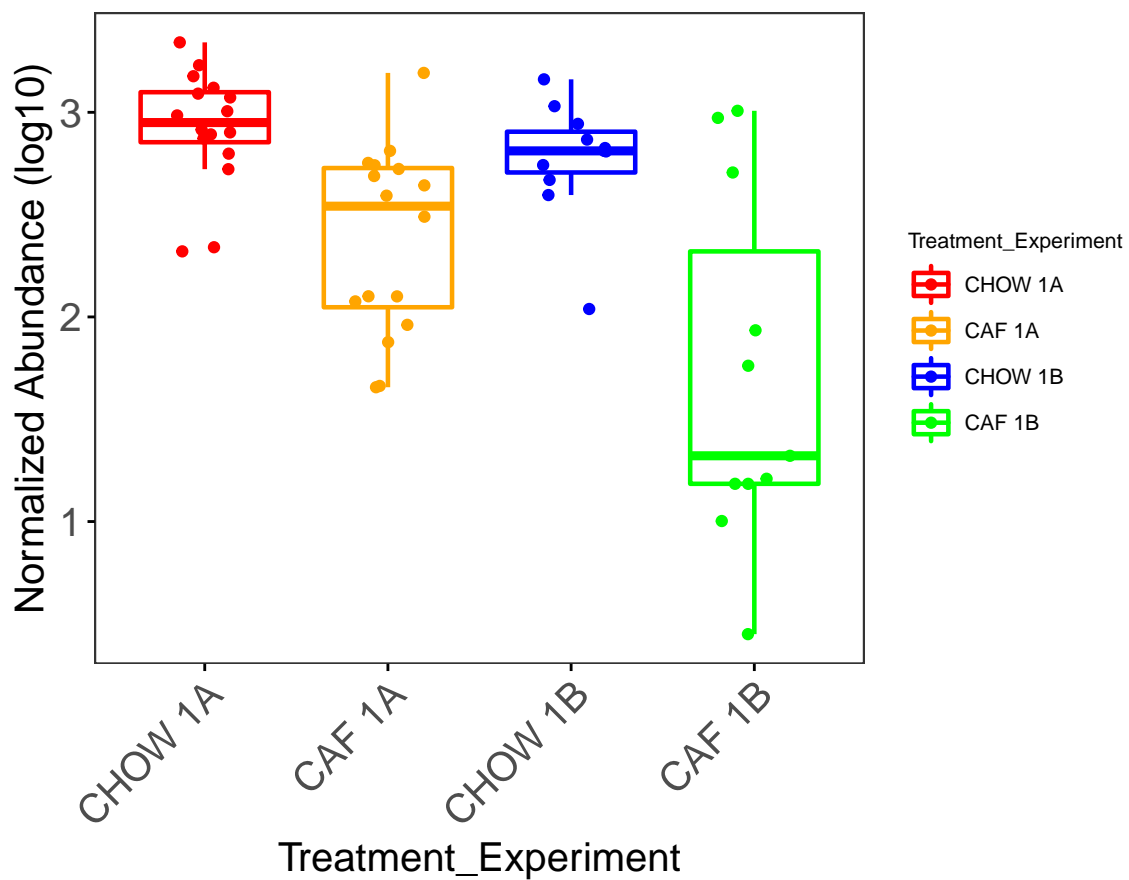

Proteobacteria.D.2\_Gammaproteobacteria.D.3\_Betaproteobacteriales.D.4\_Burkholderiaceae  
Experiment 1A FDR = 0.82051  
Experiment 1B FDR = 9e-05

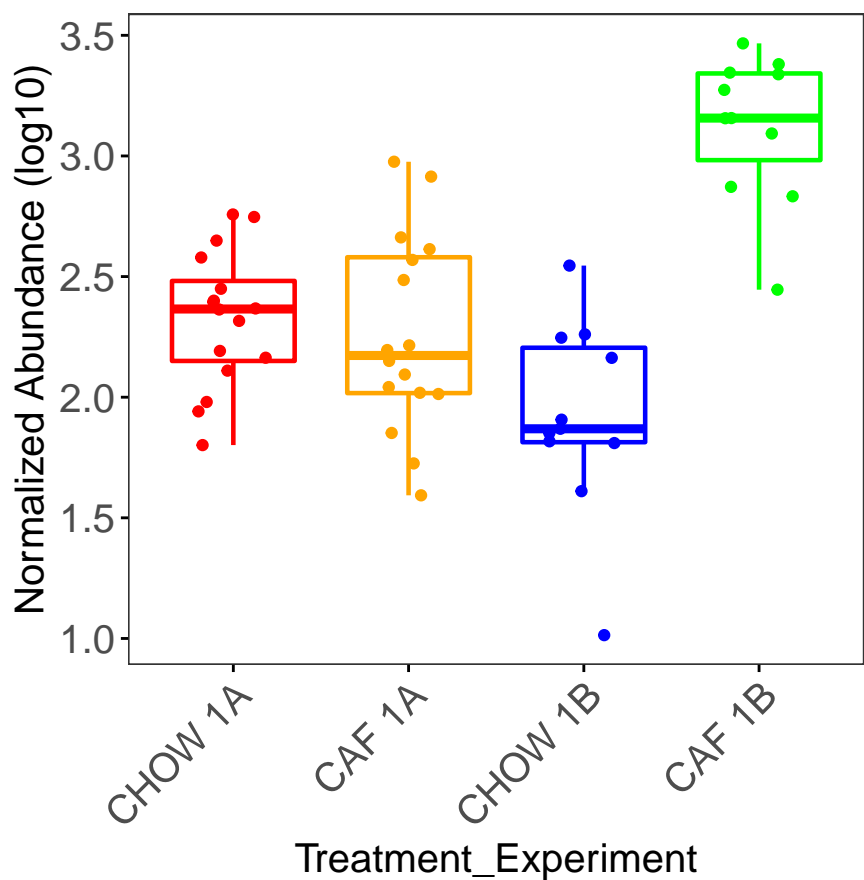

Treatment\_Experiment  
CHOW 1A  
CAF 1A  
CHOW 1B  
CAF 1B

Tenericutes.D.2\_Mollicutes.D.3\_Mollicutes RF39...  
Experiment 1A FDR = 0.85856  
Experiment 1B FDR = 0.04013

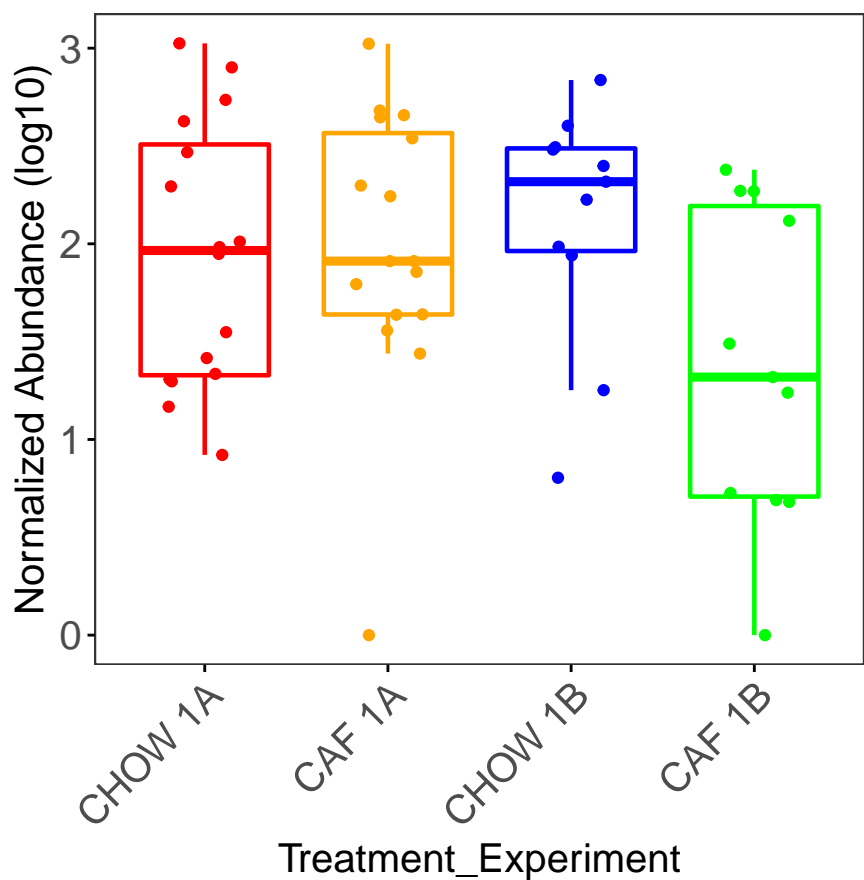

Treatment\_Experiment  
CHOW 1A  
CAF 1A  
CHOW 1B  
CAF 1B

Bacteroidetes.D.2\_Bacteroidia.D.3\_Bacteroidales.D.4\_Tannerellaceae  
Experiment 1A FDR = 0.02683  
Experiment 1B FDR = 0.94873

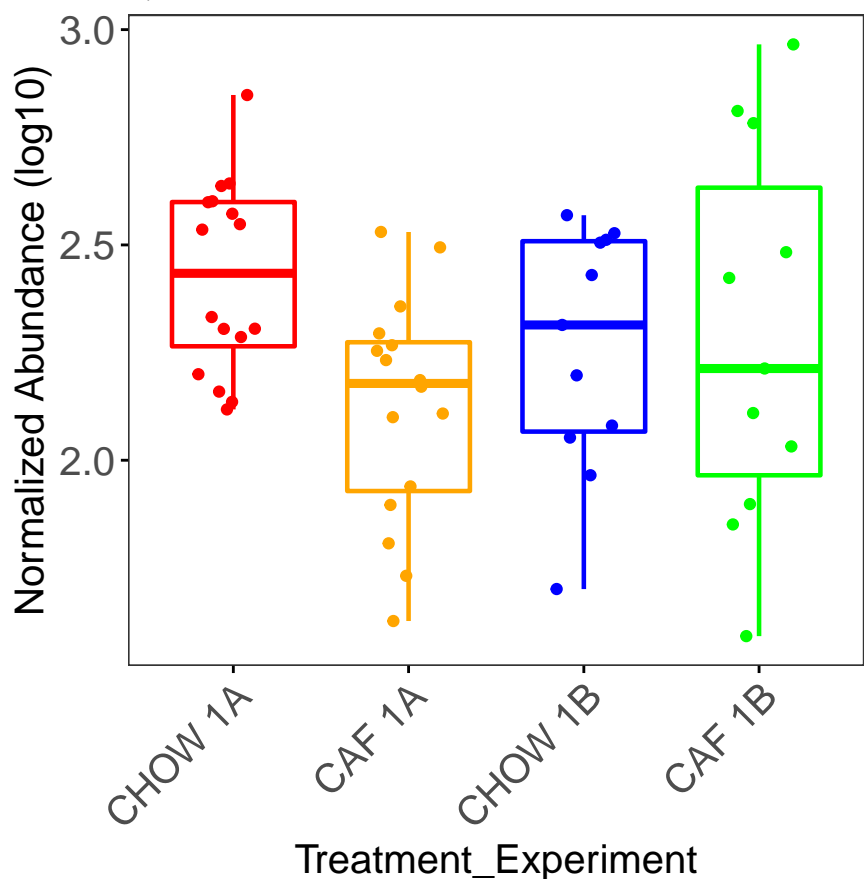

Treatment\_Experiment  
CHOW 1A  
CAF 1A  
CHOW 1B  
CAF 1B

Firmicutes.D.2\_Clostridia.D.3\_Clostridiales.D.4\_Peptostreptococaceae  
Experiment 1A FDR = 1  
Experiment 1B FDR = 0.0016

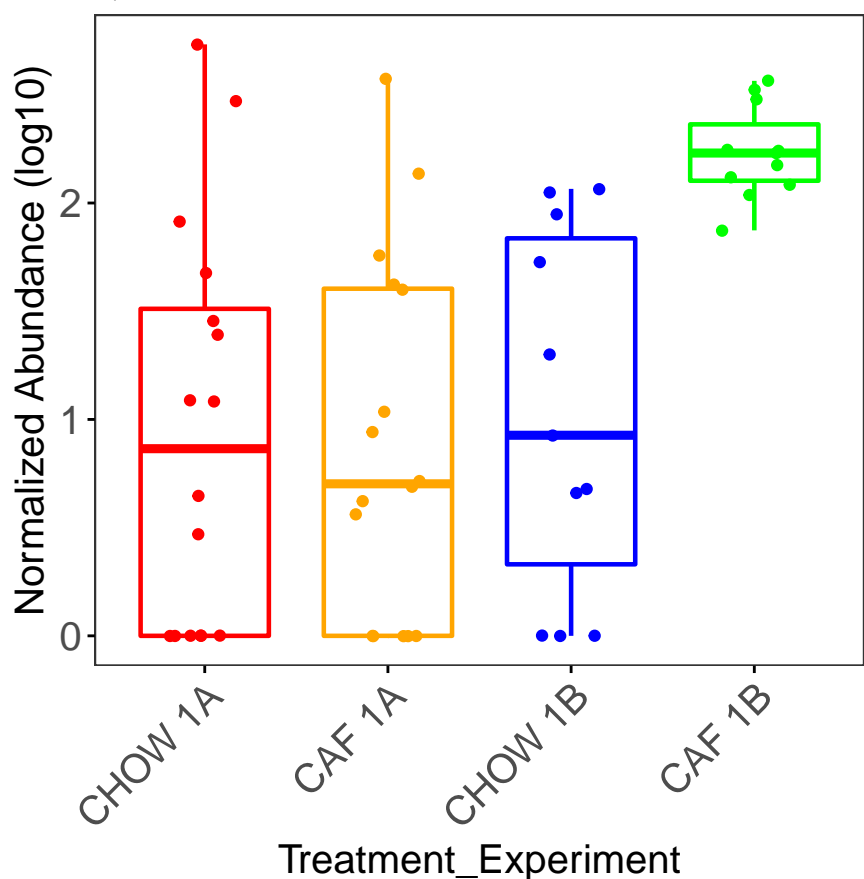

Treatment\_Experiment  
CHOW 1A  
CAF 1A  
CHOW 1B  
CAF 1B

Actinobacteria.D.2\_Actinobacteria.D.3\_Bifidobacteriales.D.4\_Bifidobacteriaceae  
Experiment 1A FDR = 0.72505  
Experiment 1B FDR = 0.00041

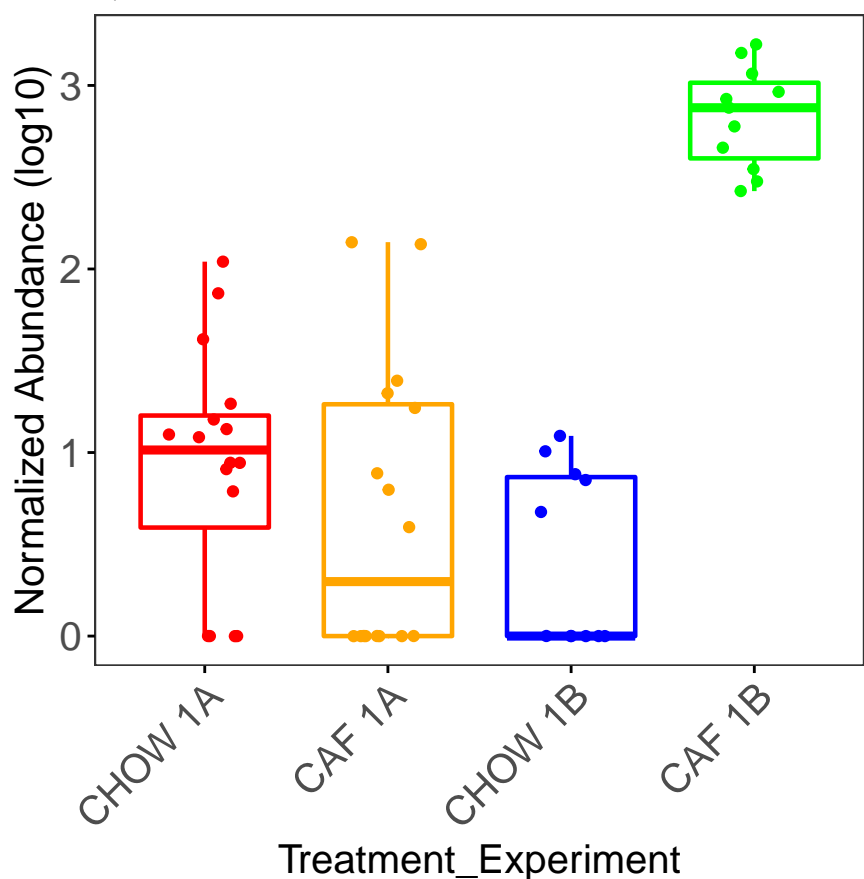

Treatment\_Experiment  
CHOW 1A  
CAF 1A  
CHOW 1B  
CAF 1B

Proteobacteria.D.2\_Deltaproteobacteria.D.3\_Desulfuovibrionales.D.4\_Desulfuovibrionaceae  
Experiment 1A FDR = 0.8043  
Experiment 1B FDR = 0.02104

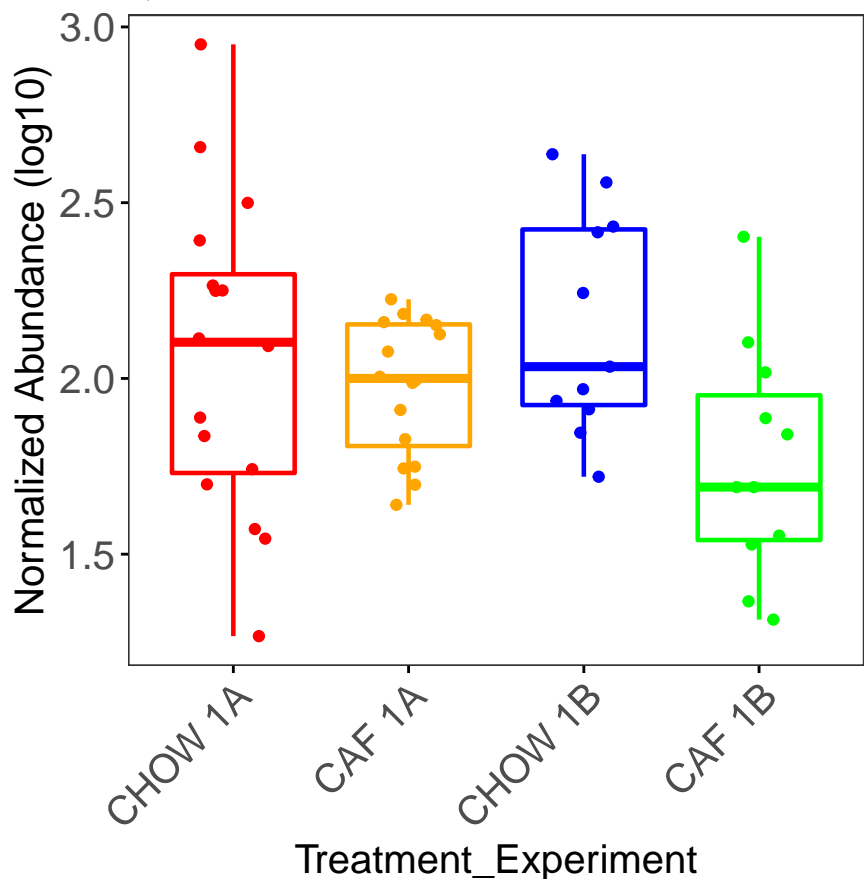

Treatment\_Experiment  
CHOW 1A  
CAF 1A  
CHOW 1B  
CAF 1B

Firmicutes  
Experiment 1A FDR = 0.04813  
Experiment 1B FDR = 0.73661

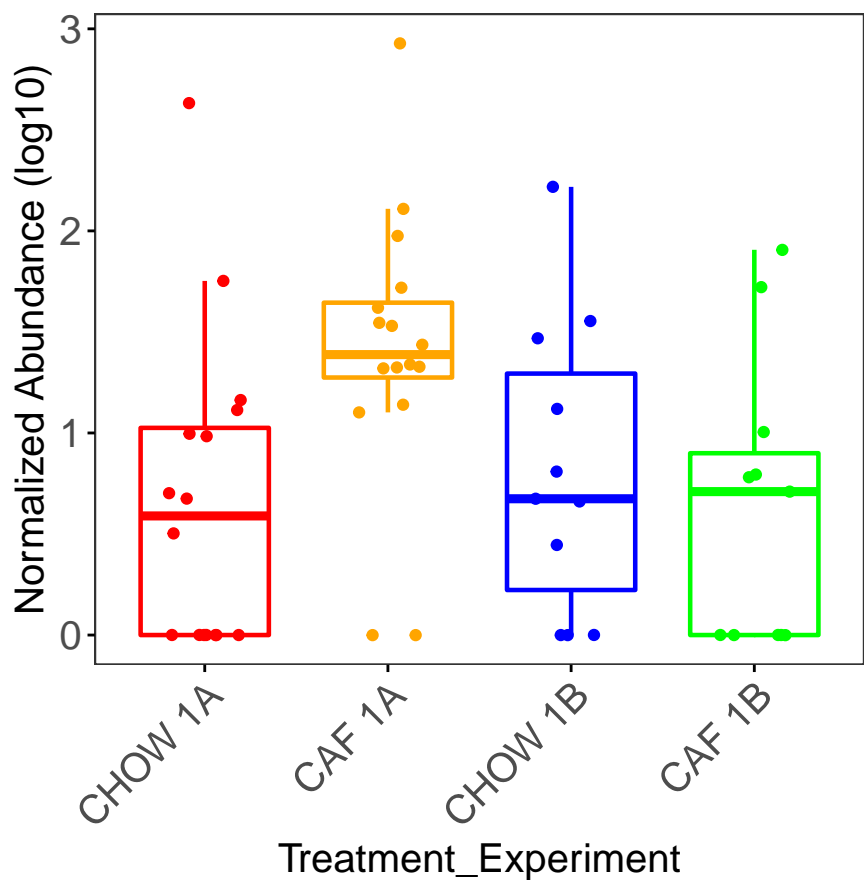

Firmicutes.D.2\_\_Bacilli.D.3\_\_Lactobacillales.D.4\_\_Streptococaceae  
Experiment 1A FDR = 0.67159  
Experiment 1B FDR = 0.00306

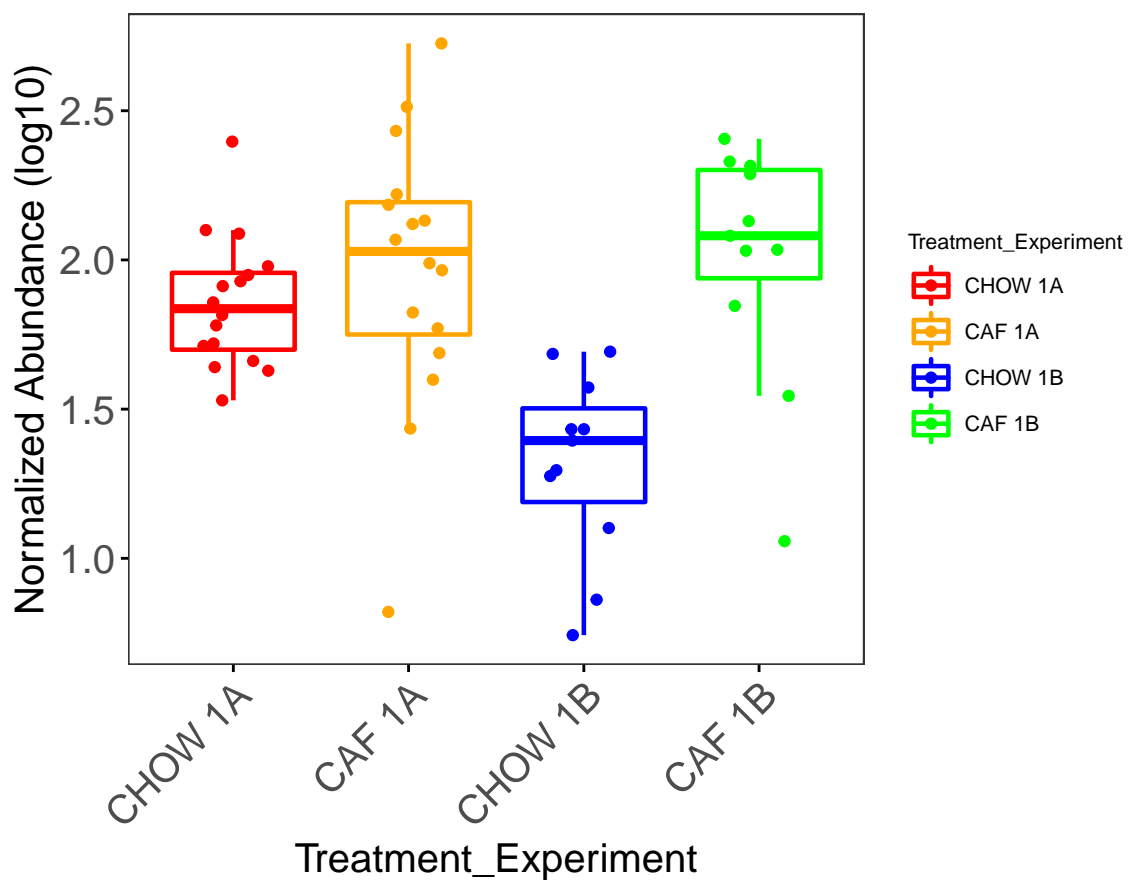

Actinobacteria.D.2\_\_Coriobacterii.D.3\_\_Coriobacteriales.D.4\_\_Atopobiaceae  
Experiment 1A FDR = 1  
Experiment 1B FDR = 0.00041

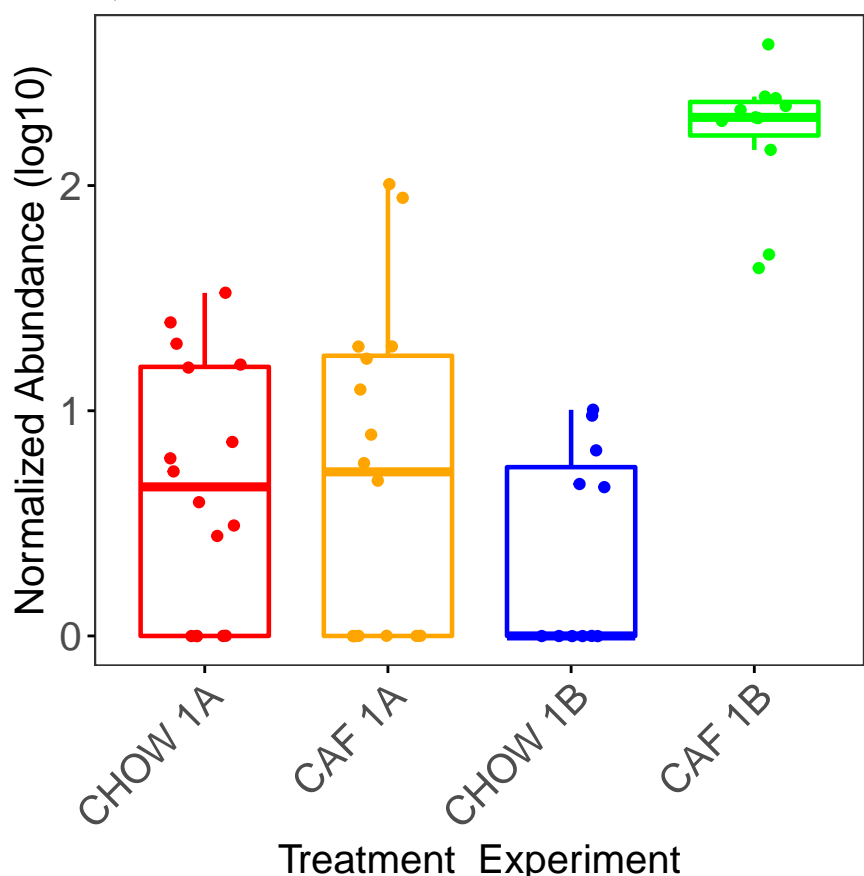

Proteobacteria.D.2\_\_Gammaproteobacteria.D.3\_\_Betaproteobacteriales  
Experiment 1A FDR = 1e-04  
Experiment 1B FDR = 2e-04

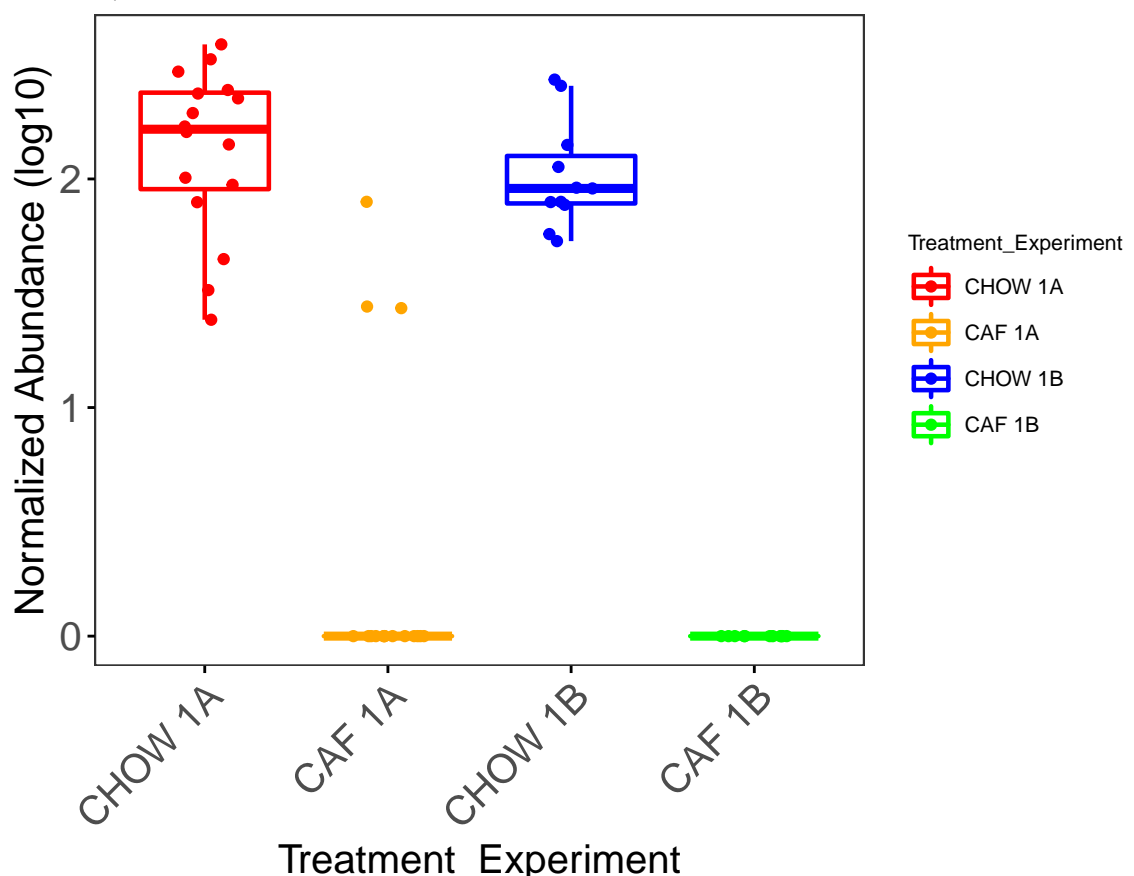

Firmicutes.D.2\_\_Clostridia.D.3\_\_Clostridiales.D.4\_\_Clostridiaceae 1  
Experiment 1A FDR = 0.69739  
Experiment 1B FDR = 0.00164

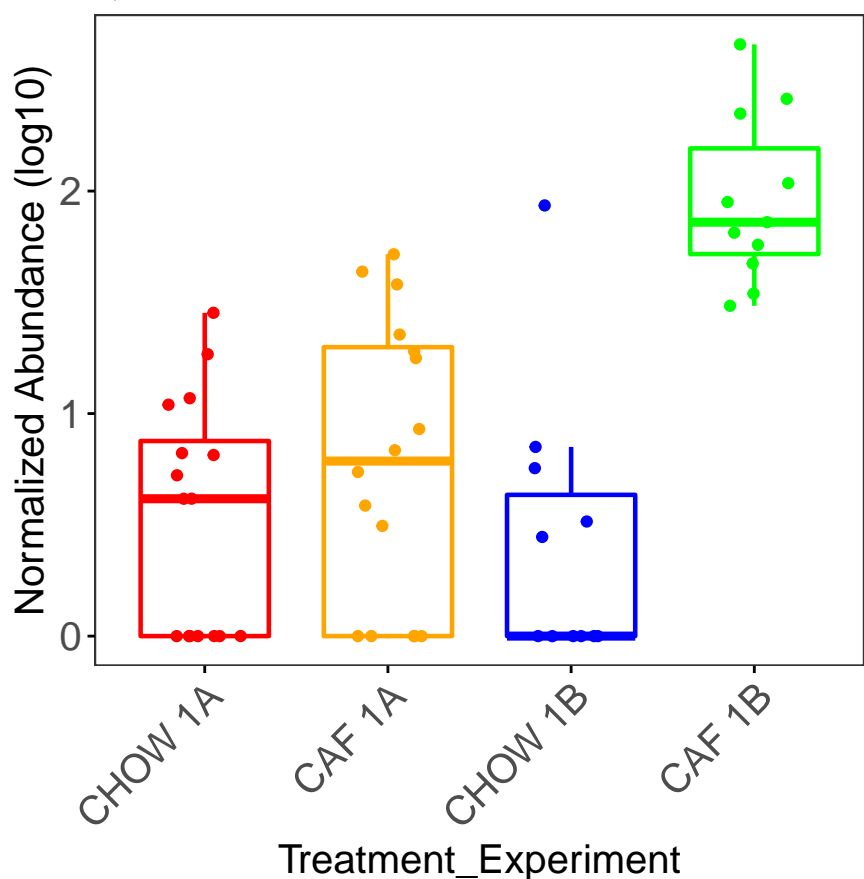

Firmicutes.D.2\_\_Clostridia.D.3\_\_Clostridiales.D.4\_\_Family XIII  
Experiment 1A FDR = 0.75204  
Experiment 1B FDR = 0.00595

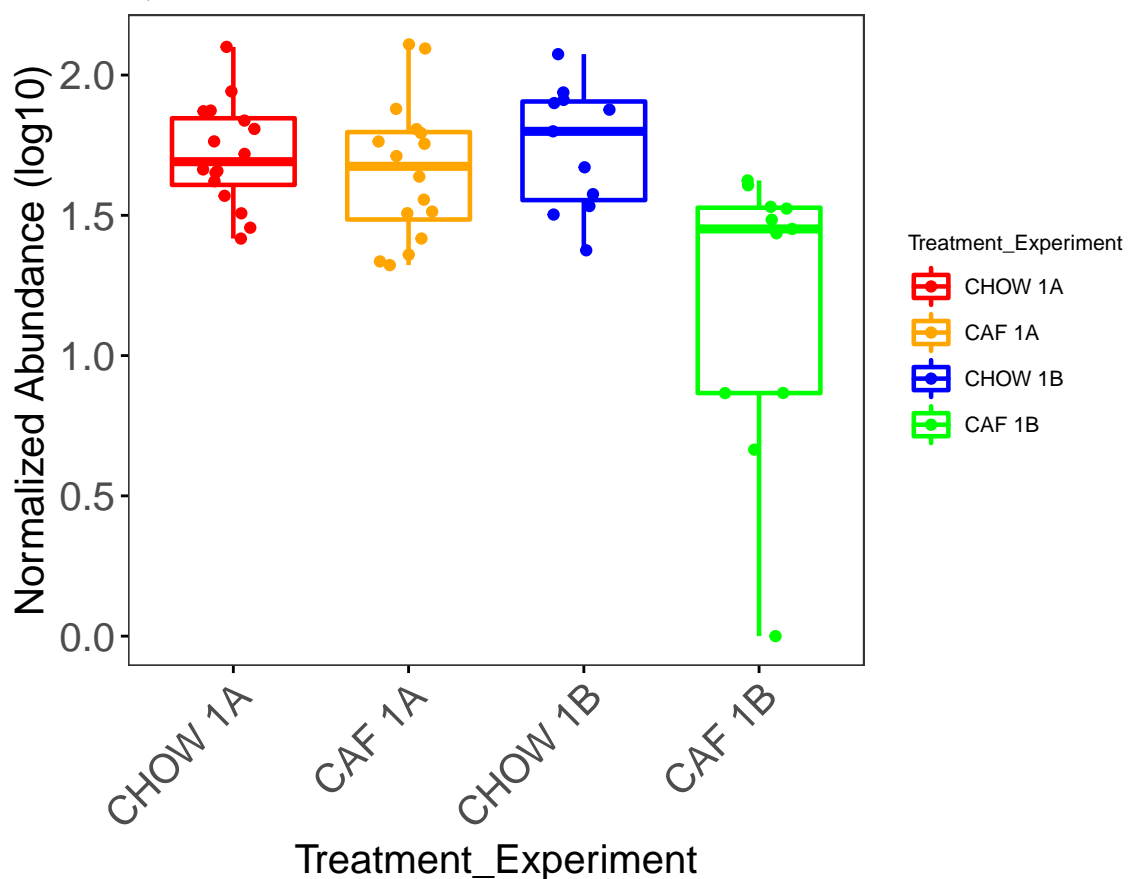

Actinobacteria.D.2\_\_Coriobacterii.D.3\_\_Coriobacteriales.D.4\_\_uncultured  
Experiment 1A FDR = 0.82051  
Experiment 1B FDR = 2e-04

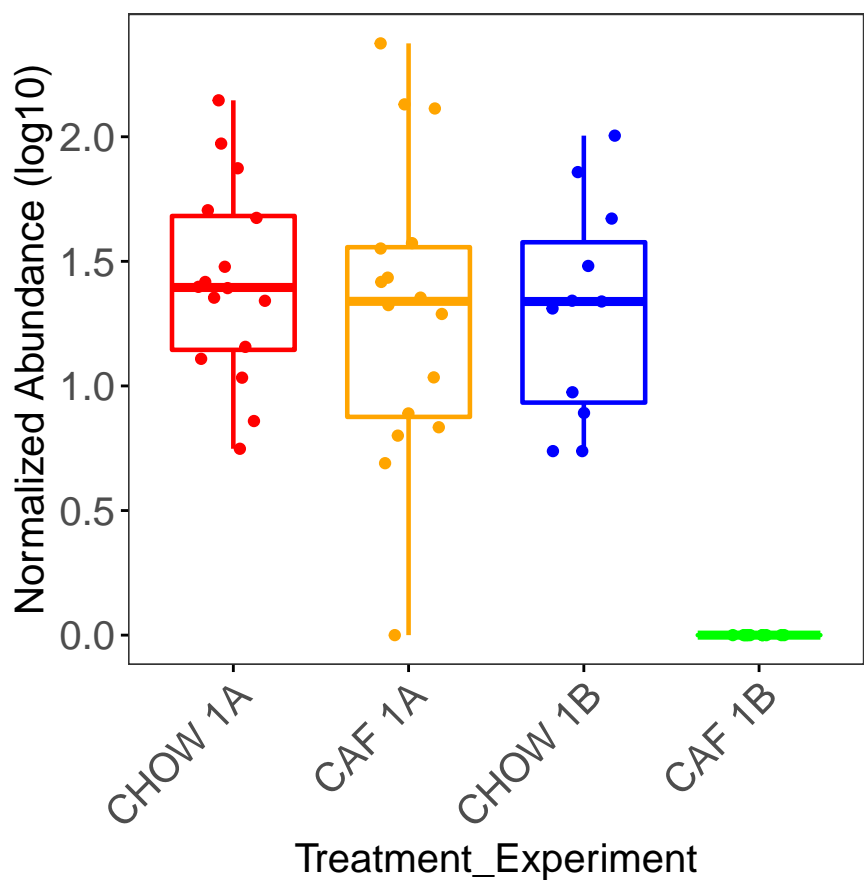

Actinobacteria.D.2\_\_Coriobacterii.D.3\_\_Coriobacteriales.D.4\_\_Eggerthellaceae  
Experiment 1A FDR = 1  
Experiment 1B FDR = 0.00241

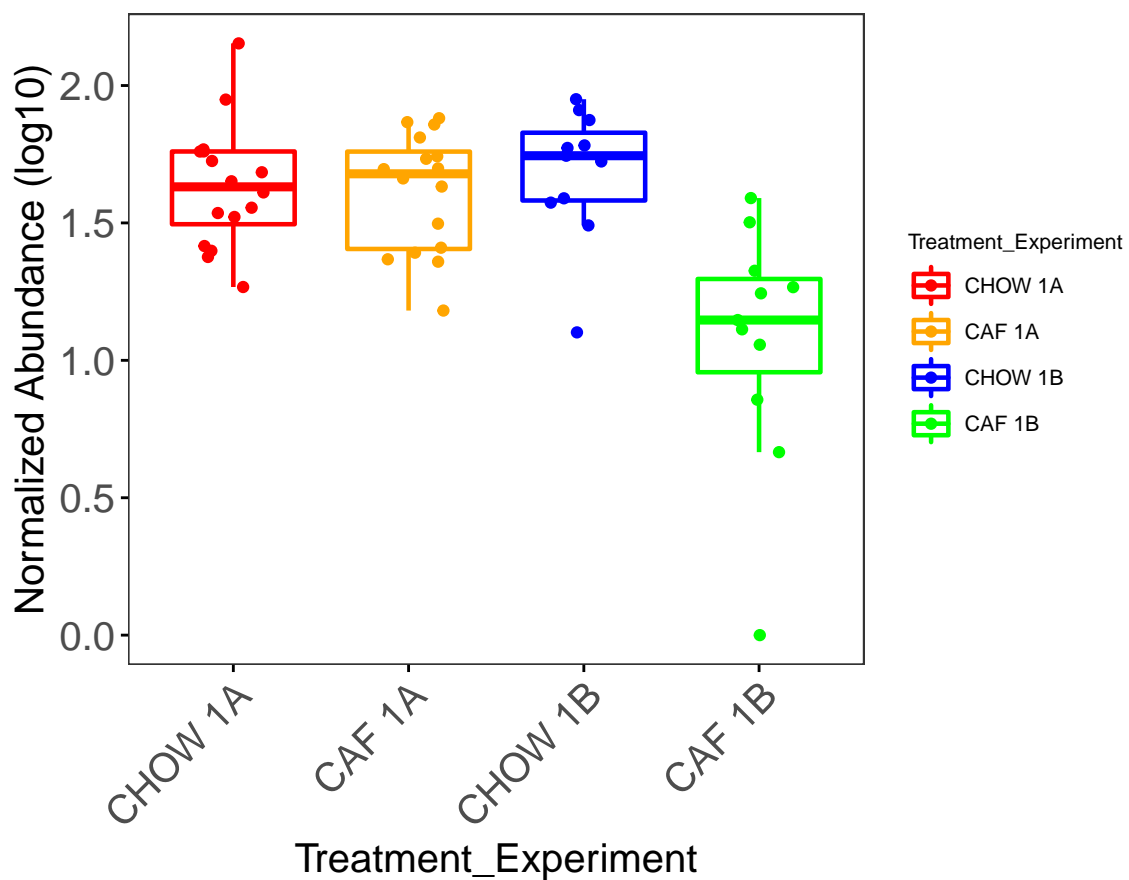

Cyanobacteria.D.2\_\_Melainabacteria.D.3\_\_Gastranaerophilales\_\_  
Experiment 1A FDR = 0.8043  
Experiment 1B FDR = 0.02304

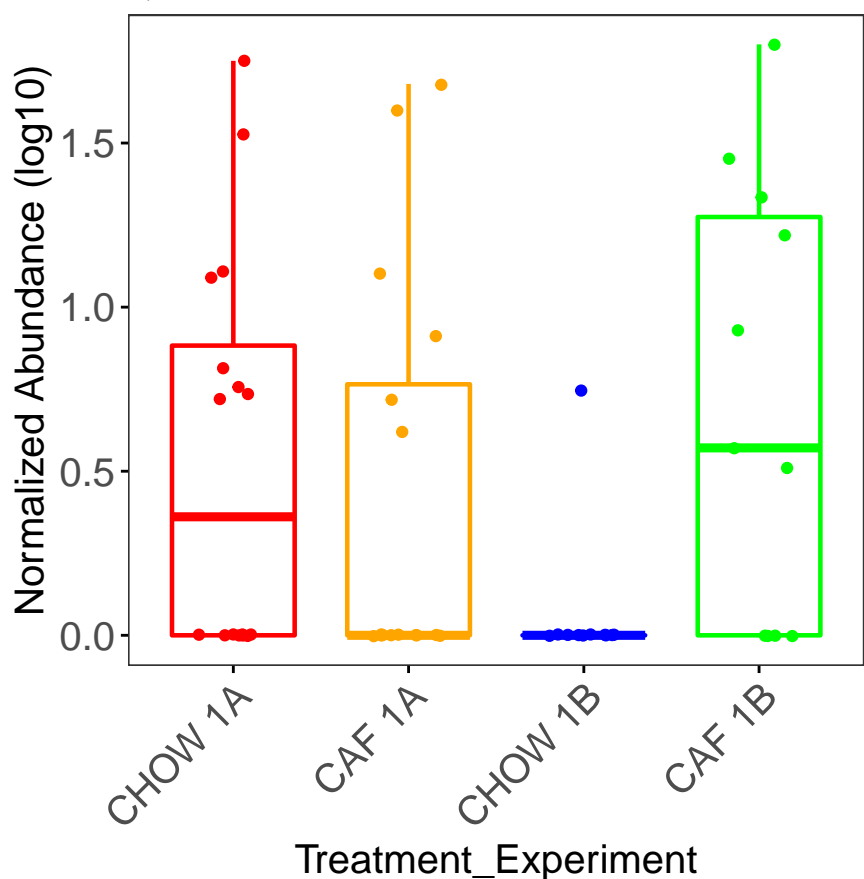

Proteobacteria.D.2\_\_Alphaproteobacteria.D.3\_\_Rhodospirillales.D.4\_\_uncultured  
Experiment 1A FDR = 0.8043  
Experiment 1B FDR = 0.09877

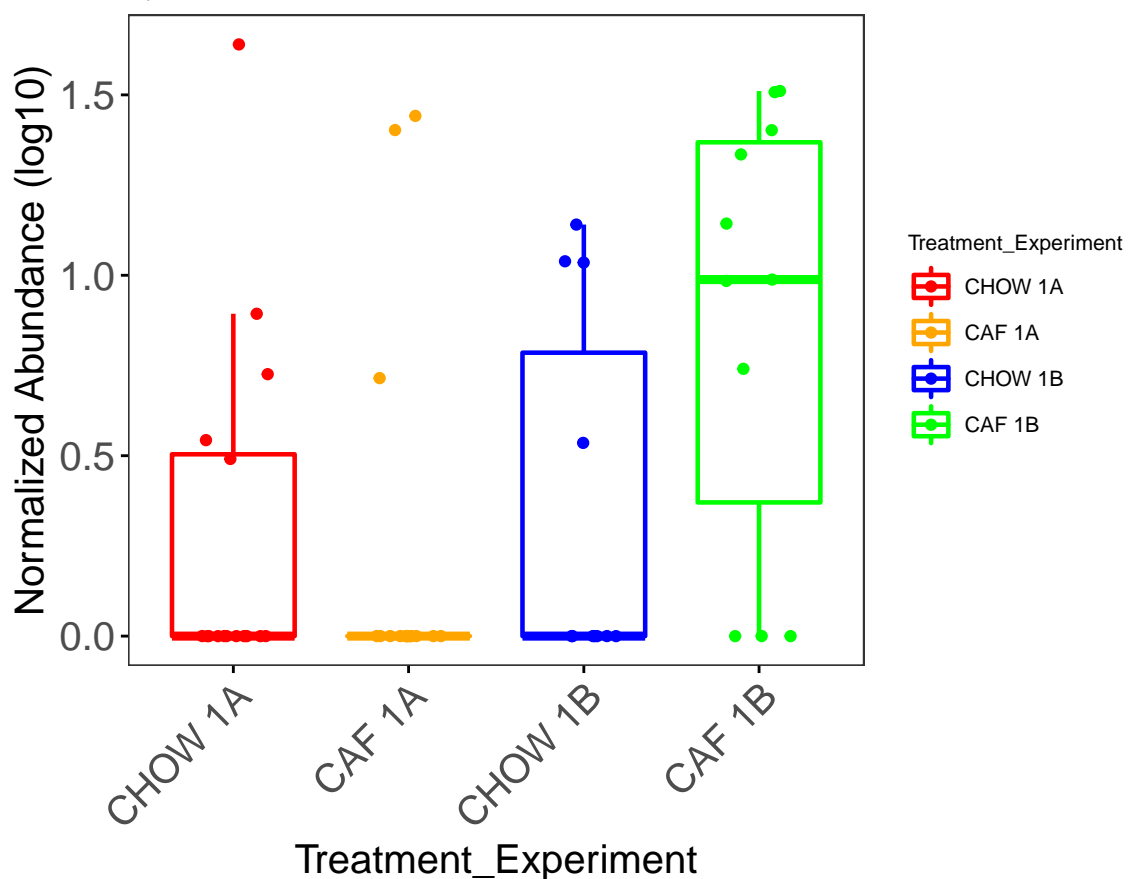

Actinobacteria.D.2\_\_Coriobacterii.D.3\_\_Coriobacteriales.D.4\_\_Coriobacteriales Incertae Sedis  
Experiment 1A FDR = 0.728  
Experiment 1B FDR = 0.0034

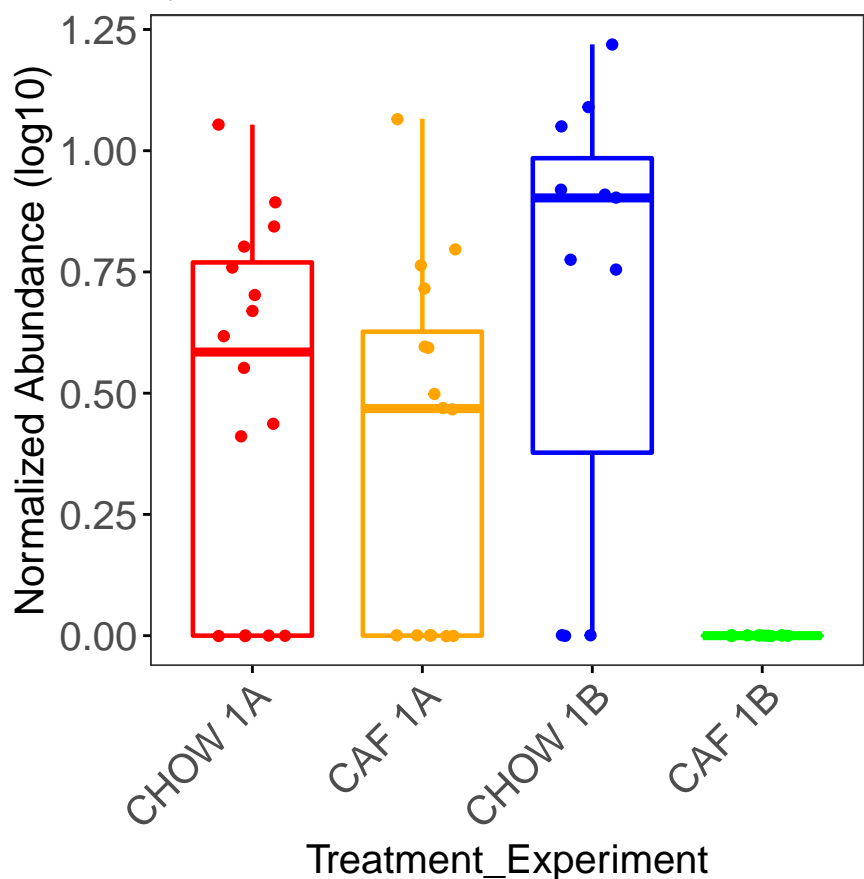

Firmicutes.D.2\_\_Clostridia.D.3\_\_Clostridiales.D.4\_\_Clostridiales vadinBB60 group  
Experiment 1A FDR = 0.69739  
Experiment 1B FDR = 0.03439

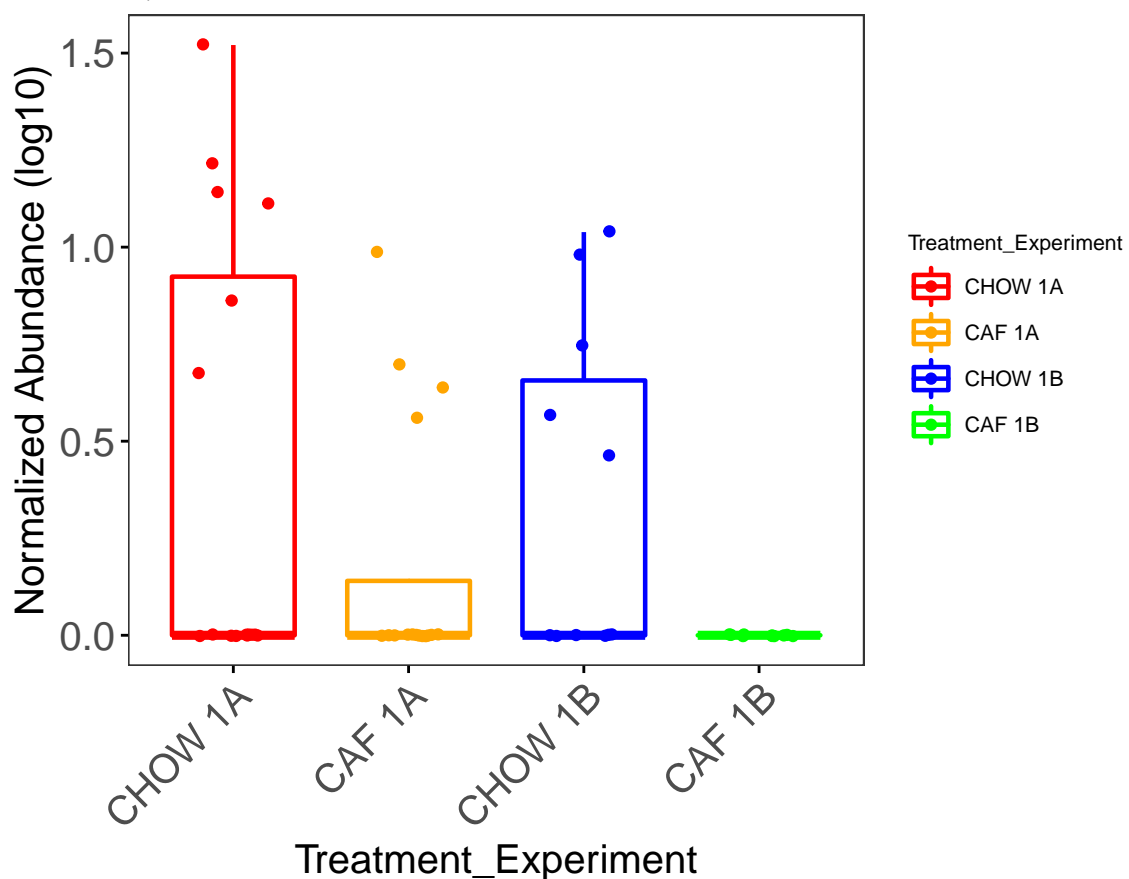



Firmicutes.D.2\_\_Clostridia.D.3\_\_Clostridiales.D.4\_\_Eubacteriaceae  
Experiment 1A FDR = 0.728  
Experiment 1B FDR = 0.01849

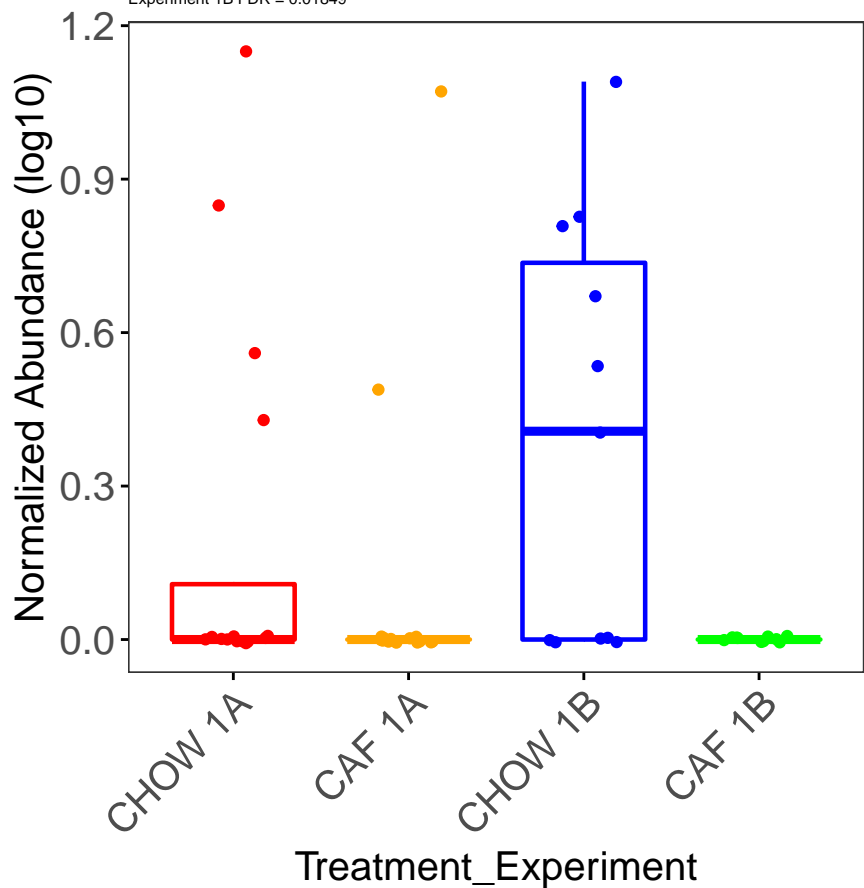

Treatment\_Experiment  
CHOW 1A  
CAF 1A  
CHOW 1B  
CAF 1B

Bacteroidetes.D.2\_\_Bacteroidia.D.3\_\_Bacteroidales.D.4\_\_Muribaculaceae\_\_\_\_  
Experiment 1A FDR = 0.96813  
Experiment 1B FDR = 0.00497

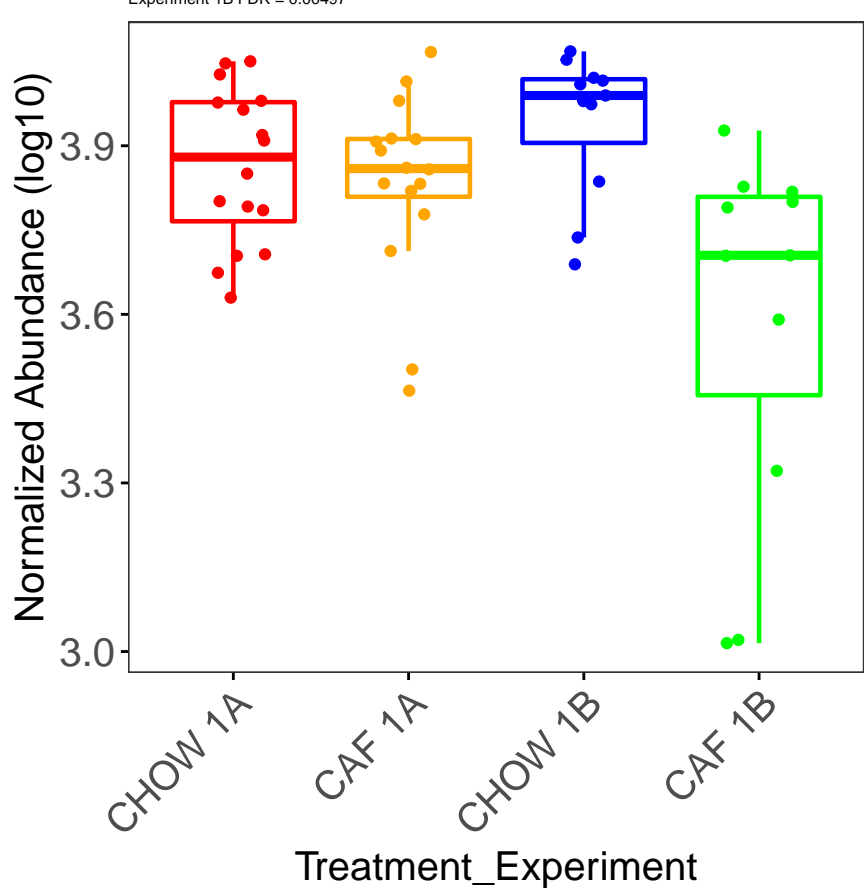

Treatment\_Experiment  
CHOW 1A  
CAF 1A  
CHOW 1B  
CAF 1B

Firmicutes.D.2\_\_Clostridia.D.3\_\_Clostridiales.D.4\_\_Ruminococcaceae.D.5\_\_Ruminococcaceae UCG-014  
Experiment 1A FDR = 0.49839  
Experiment 1B FDR = 0.00639

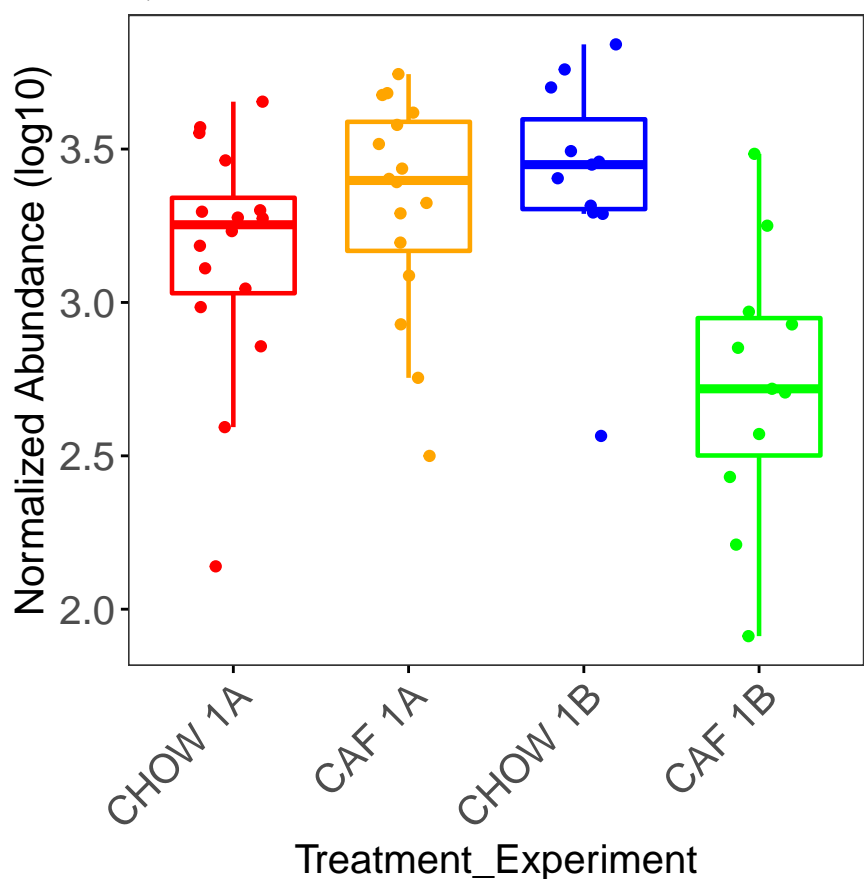

Treatment\_Experiment  
CHOW 1A  
CAF 1A  
CHOW 1B  
CAF 1B

Firmicutes.D.2\_\_Clostridia.D.3\_\_Clostridiales.D.4\_\_Ruminococcaceae\_\_\_\_  
Experiment 1A FDR = 0.67383  
Experiment 1B FDR = 0.0023

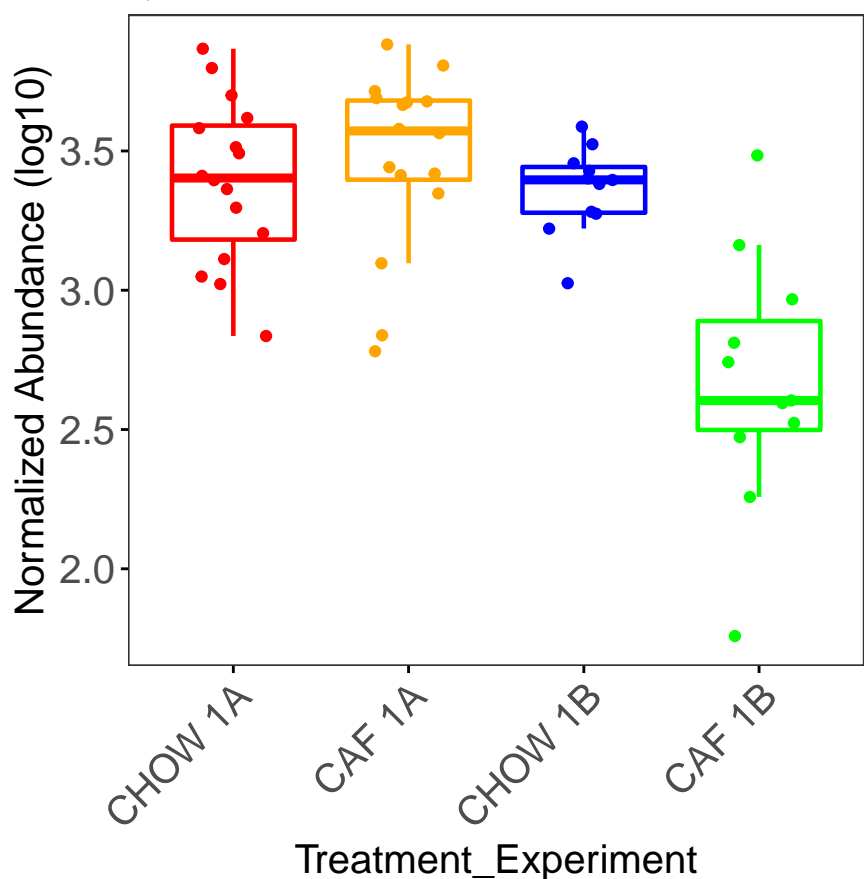

Treatment\_Experiment  
CHOW 1A  
CAF 1A  
CHOW 1B  
CAF 1B

Bacteroidetes.D.2\_\_Bacteroidia.D.3\_\_Bacteroidales\_\_\_\_  
Experiment 1A FDR = 0.55966  
Experiment 1B FDR = 0.03643

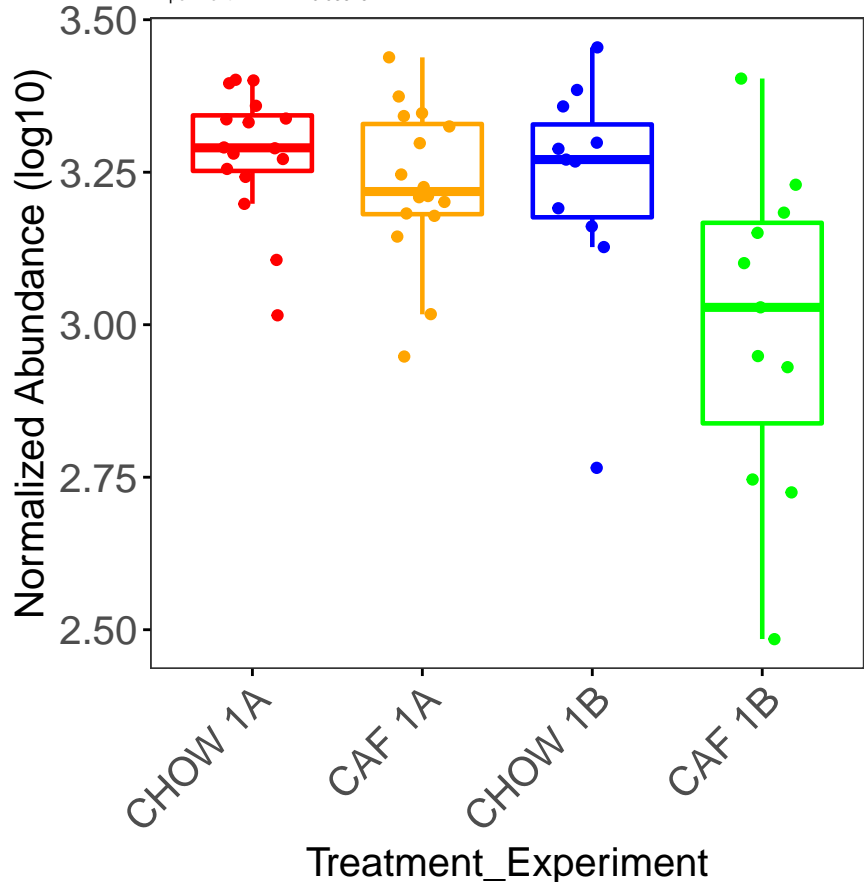

Treatment\_Experiment  
CHOW 1A  
CAF 1A  
CHOW 1B  
CAF 1B

Firmicutes.D.2\_\_Clostridia.D.3\_\_Clostridiales.D.4\_\_Ruminococcaceae.D.5\_\_Ruminococcus 1  
Experiment 1A FDR = 0.79901  
Experiment 1B FDR = 0.03206

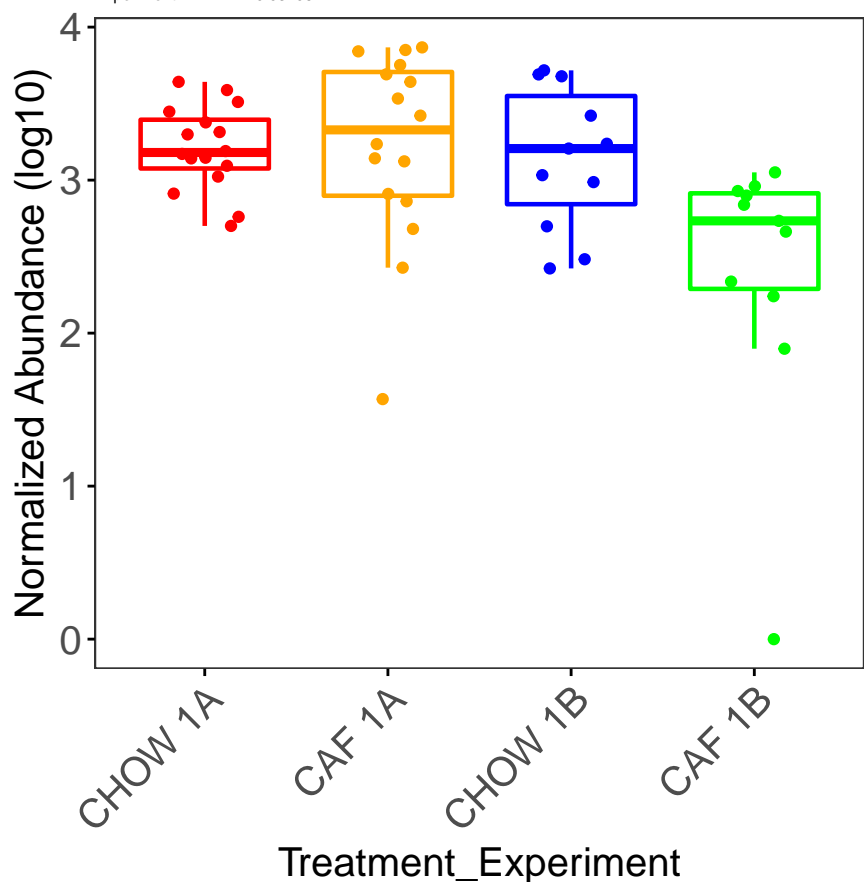

Treatment\_Experiment  
CHOW 1A  
CAF 1A  
CHOW 1B  
CAF 1B

Firmicutes.D.2\_\_Erysipelotrichia.D.3\_\_Erysipelotrichales.D.4\_\_Erysipelotrichaceae.D.5\_\_Allobaculum  
Experiment 1A FDR = 0.99386  
Experiment 1B FDR = 0.00077

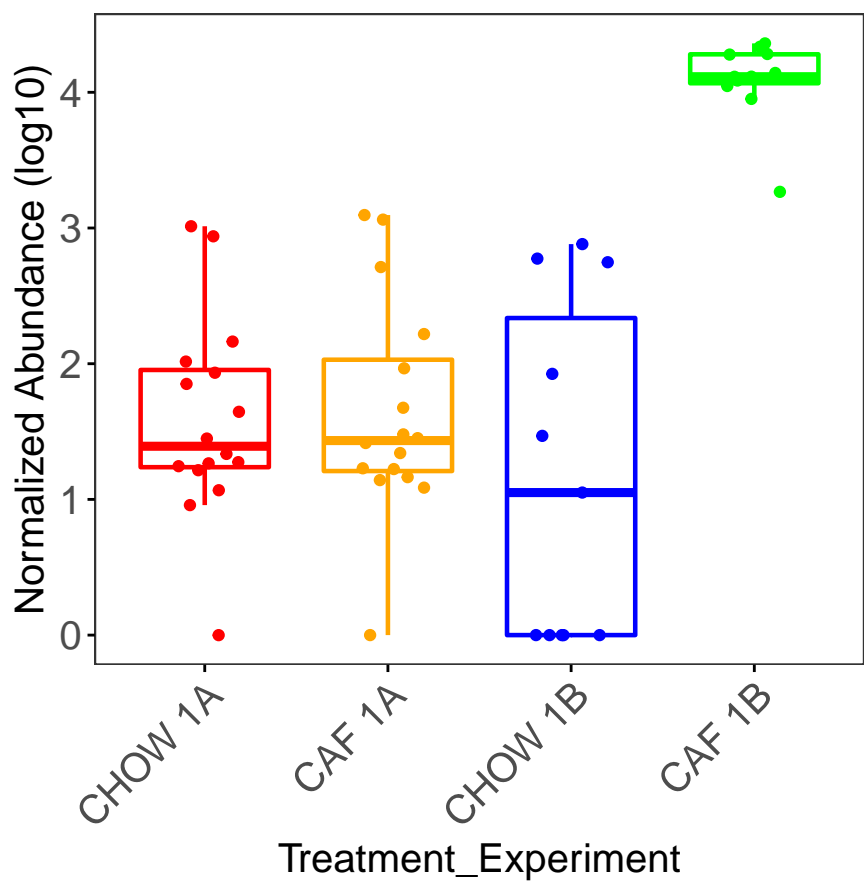

Firmicutes.D.2\_\_Clostridia.D.3\_\_Clostridiales.D.4\_\_Lachnospiraceae\_\_\_\_  
Experiment 1A FDR = 0.30585  
Experiment 1B FDR = 0.0107

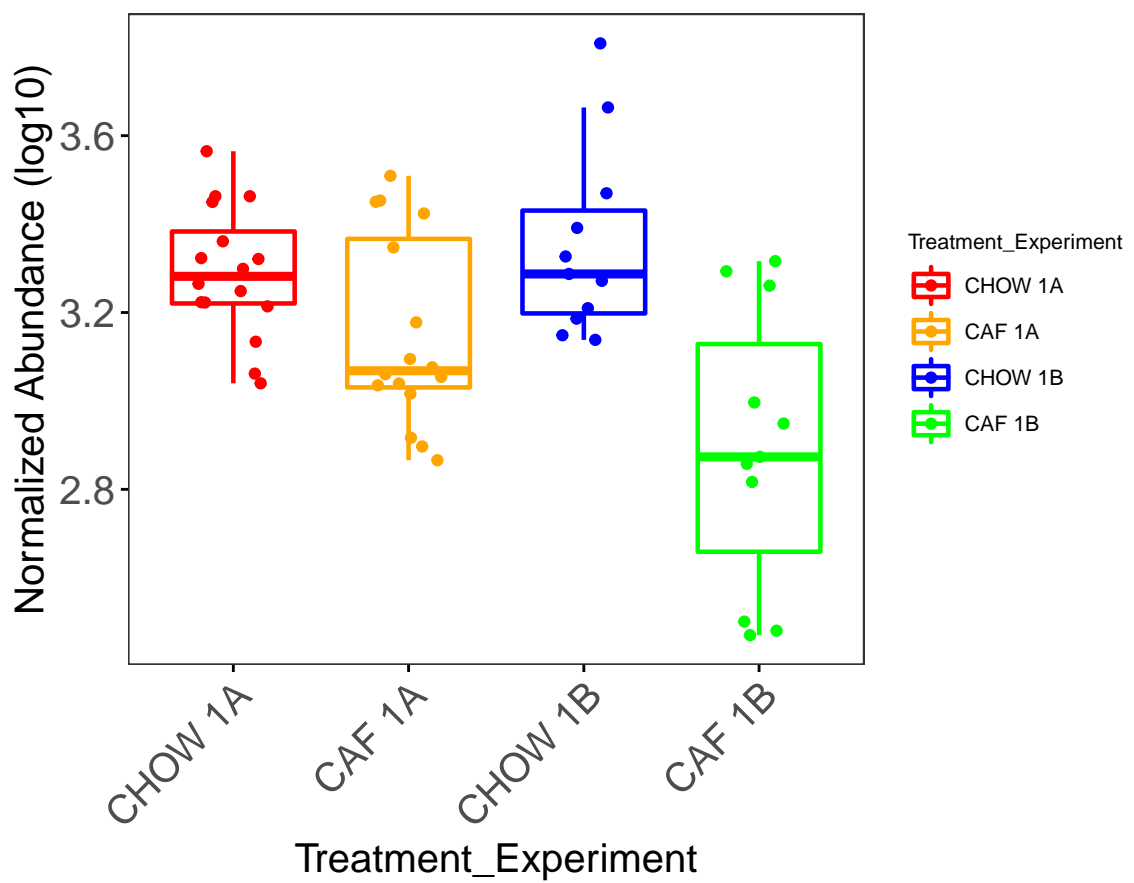

Bacteroidetes.D.2\_\_Bacteroidia.D.3\_\_Bacteroidales.D.4\_\_Prevotellaceae.D.5\_\_Prevotellaceae NK3B31 group  
Experiment 1A FDR = 0.55966  
Experiment 1B FDR = 0.00077

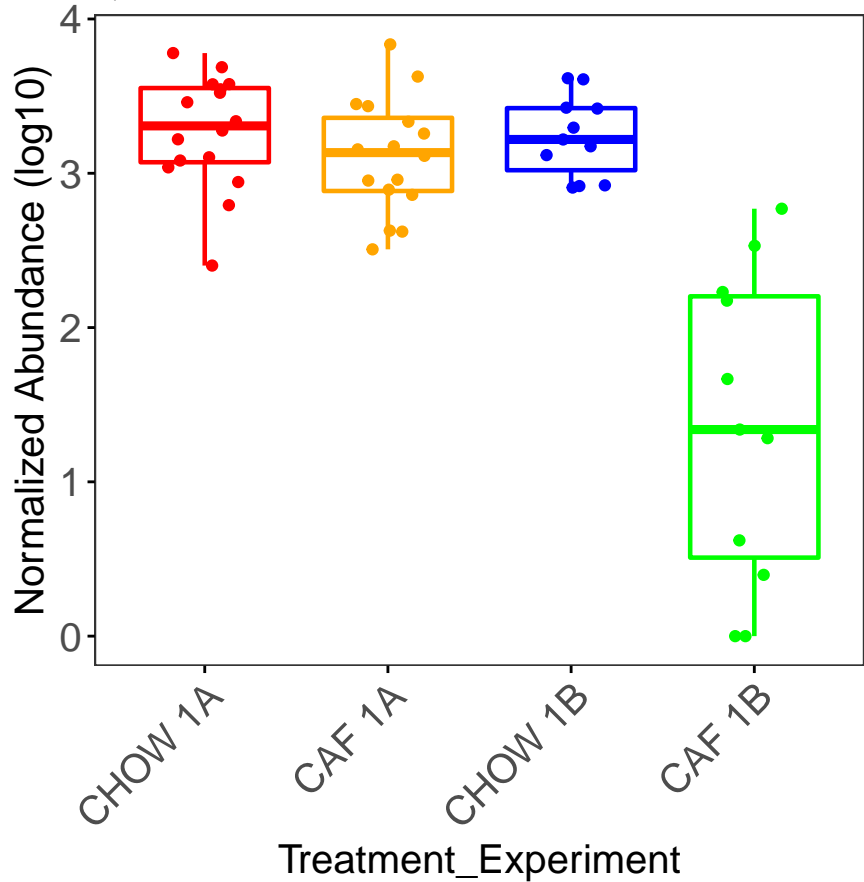

Firmicutes.D.2\_\_Clostridia.D.3\_\_Clostridiales\_\_\_\_  
Experiment 1A FDR = 0.01191  
Experiment 1B FDR = 0.02821

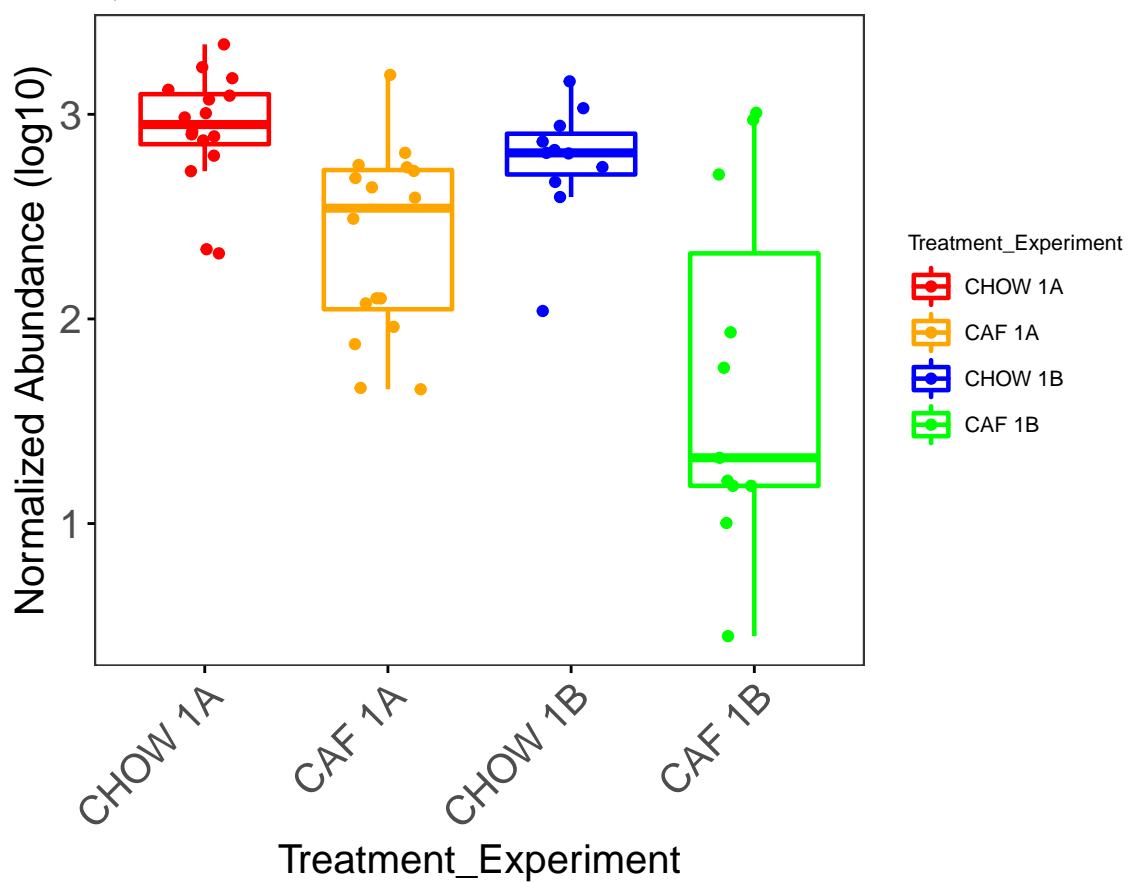

Firmicutes.D.2\_\_Clostridia.D.3\_\_Clostridiales.D.4\_\_Ruminococcaceae.D.5\_\_Ruminiclostridium 5  
Experiment 1A FDR = 1  
Experiment 1B FDR = 0.00067

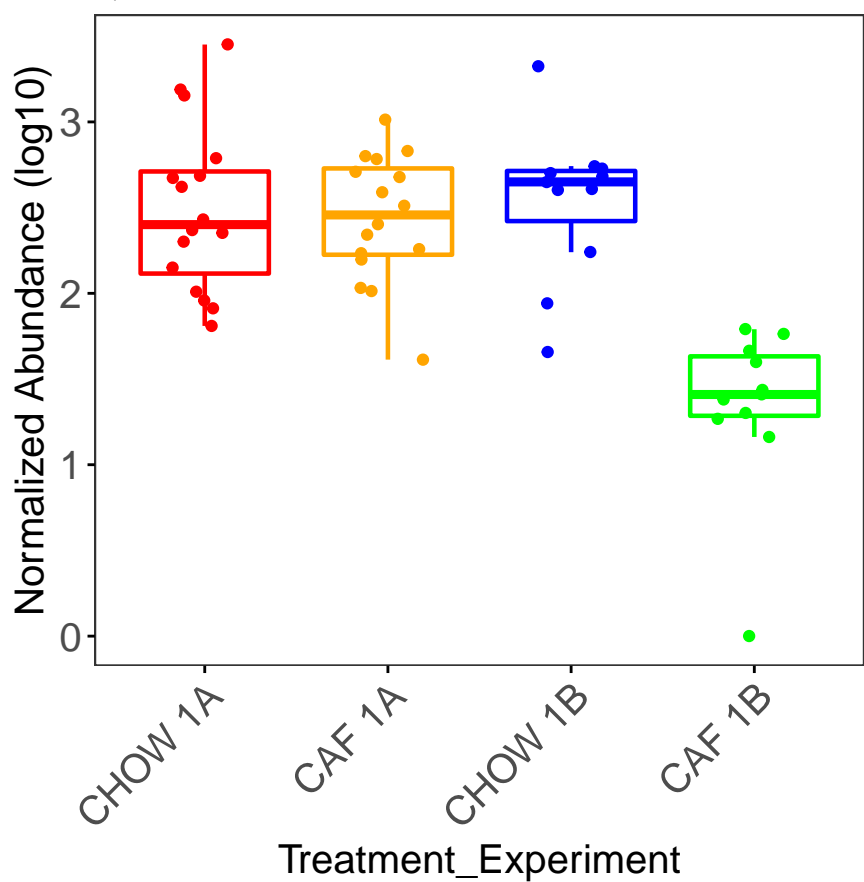

Bacteroidetes.D.2\_\_Bacteroidia.D.3\_\_Bacteroidales.D.4\_\_Prevotellaceae\_\_\_\_  
Experiment 1A FDR = 0.47606  
Experiment 1B FDR = 0.0107

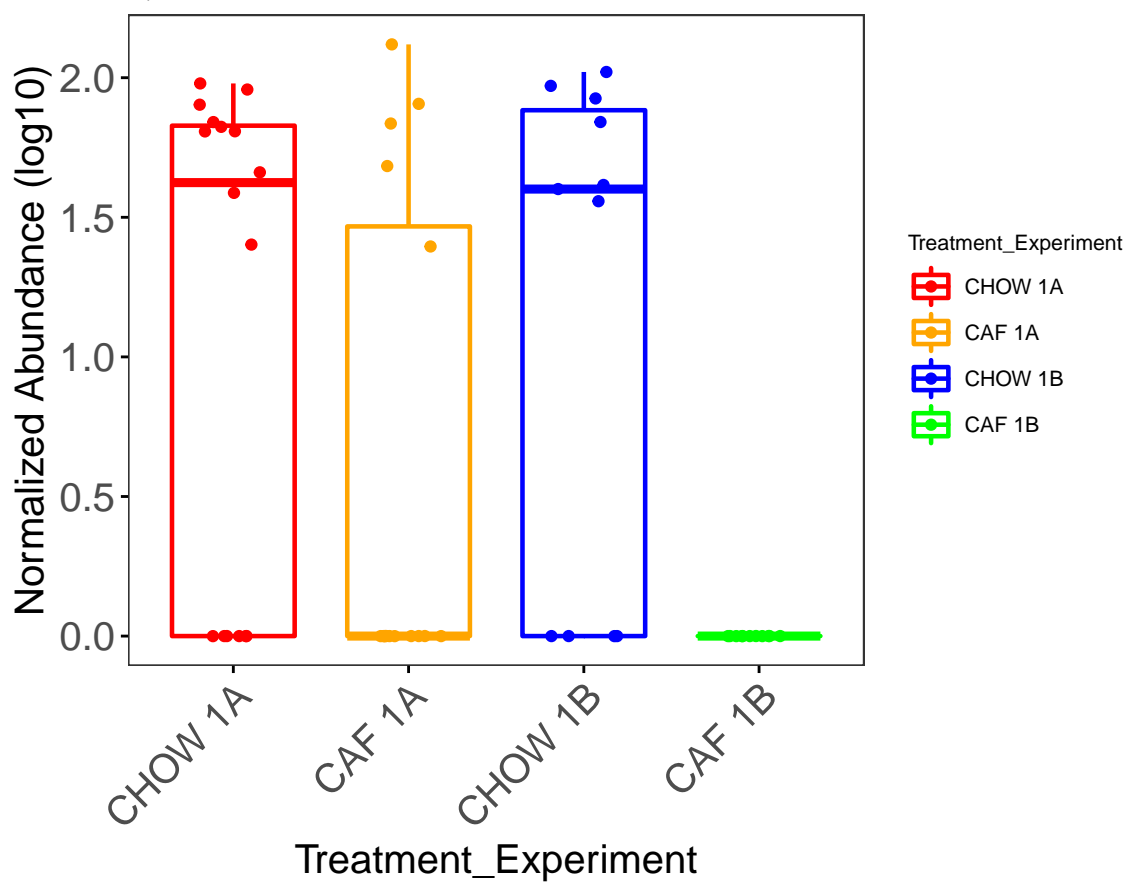

Firmicutes.D.2\_\_Clostridia.D.3\_\_Clostridiales.D.4\_\_Ruminococcaceae.D.5\_\_Ruminococcus 2  
Experiment 1A FDR = 0.94822  
Experiment 1B FDR = 0.01196

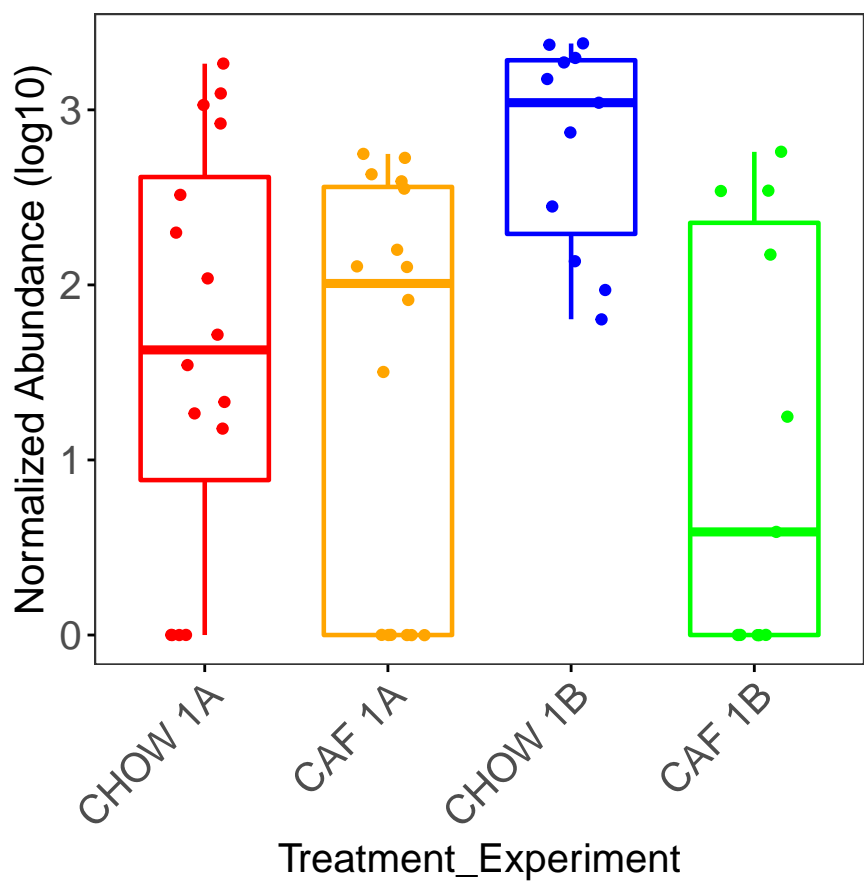

Proteobacteria.D.2\_\_Gammaproteobacteria.D.3\_\_Betaproteobacteriales.D.4\_\_Burkholderiaceae.D.5\_\_Parasutterella  
Experiment 1A FDR = 1  
Experiment 1B FDR = 6e-04

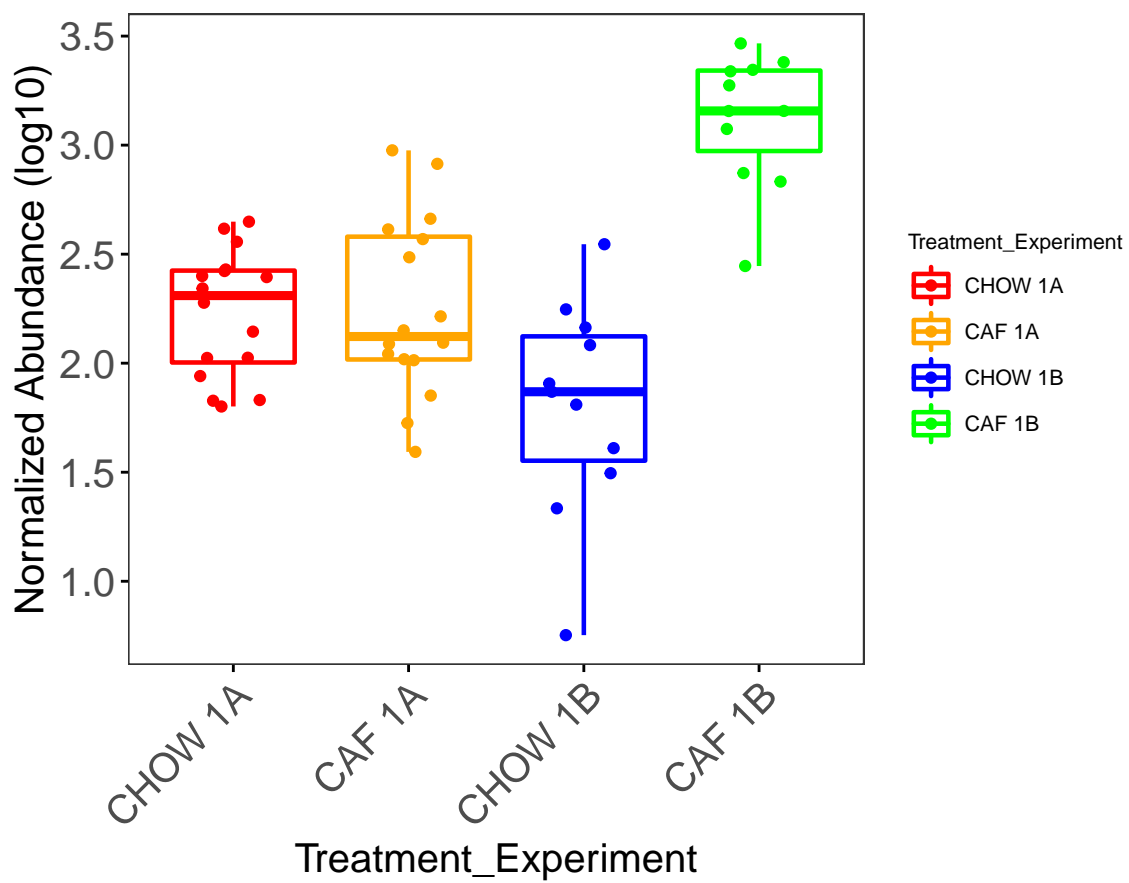

Firmicutes.D.2\_\_Clostridia.D.3\_\_Clostridiales.D.4\_\_Ruminococcaceae.D.5\_\_Ruminococcaceae UCG-013  
Experiment 1A FDR = 0.47606  
Experiment 1B FDR = 0.00153

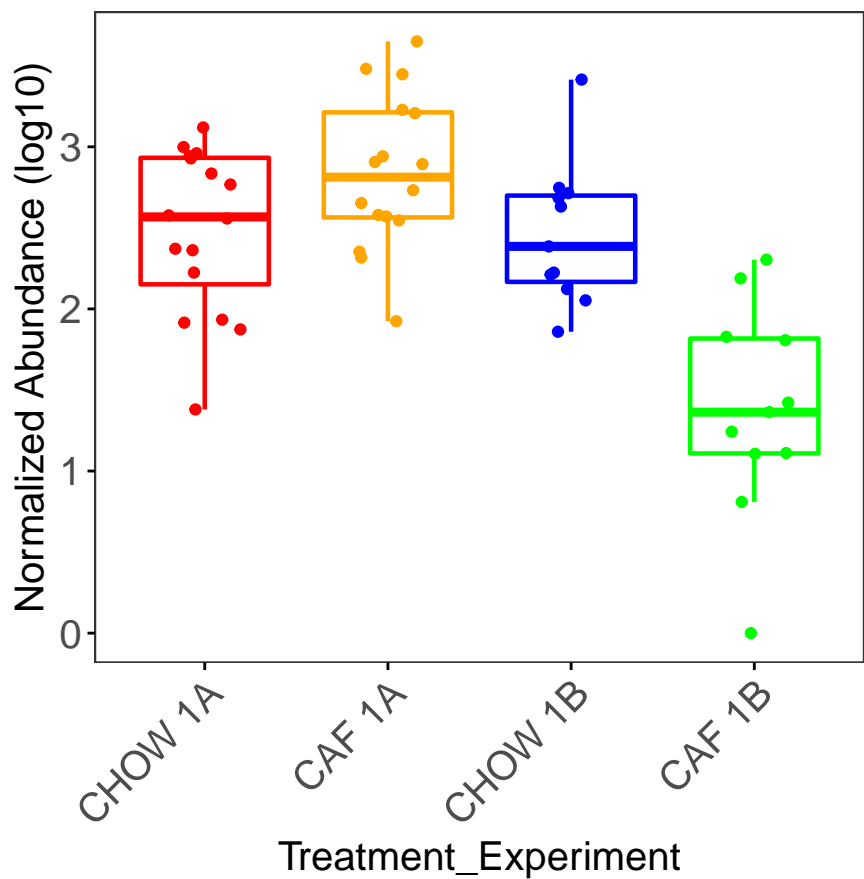

Firmicutes.D.2\_\_Clostridia.D.3\_\_Clostridiales.D.4\_\_Ruminococcaceae.D.5\_\_Ruminiclostridium 6  
Experiment 1A FDR = 0.30585  
Experiment 1B FDR = 0.00105

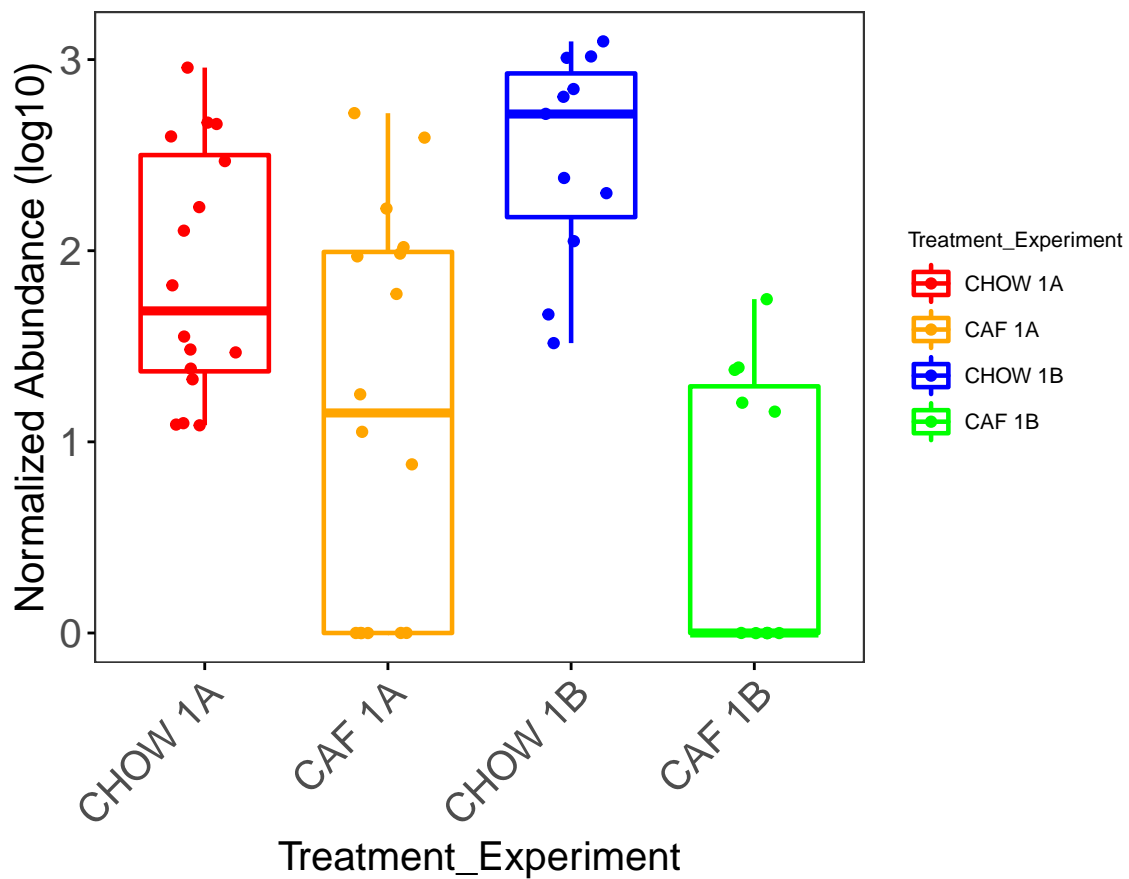

Firmicutes.D.2\_\_Clostridia.D.3\_\_Clostridiales.D.4\_\_Lachnospiraceae.D.5\_\_Lachnospiraceae NK4A136 group  
Experiment 1A FDR = 0.47521  
Experiment 1B FDR = 0.08017

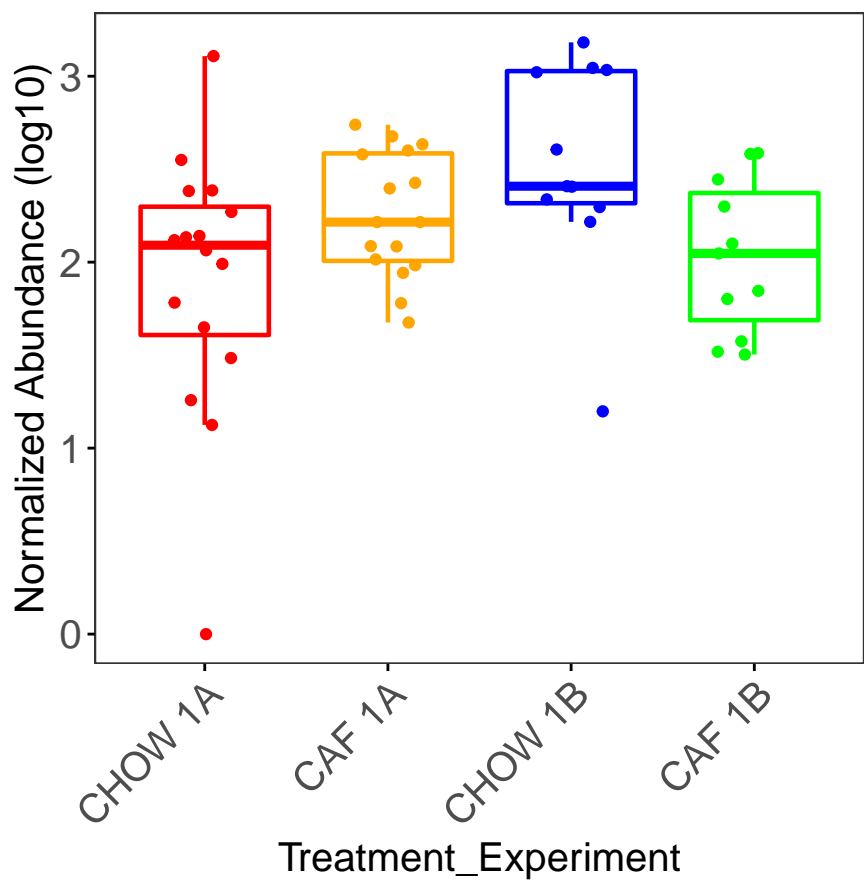

Tenericutes.D.2\_\_Mollicutes.D.3\_\_Mollicutes RF39\_\_\_\_\_  
Experiment 1A FDR = 0.87697  
Experiment 1B FDR = 0.05178

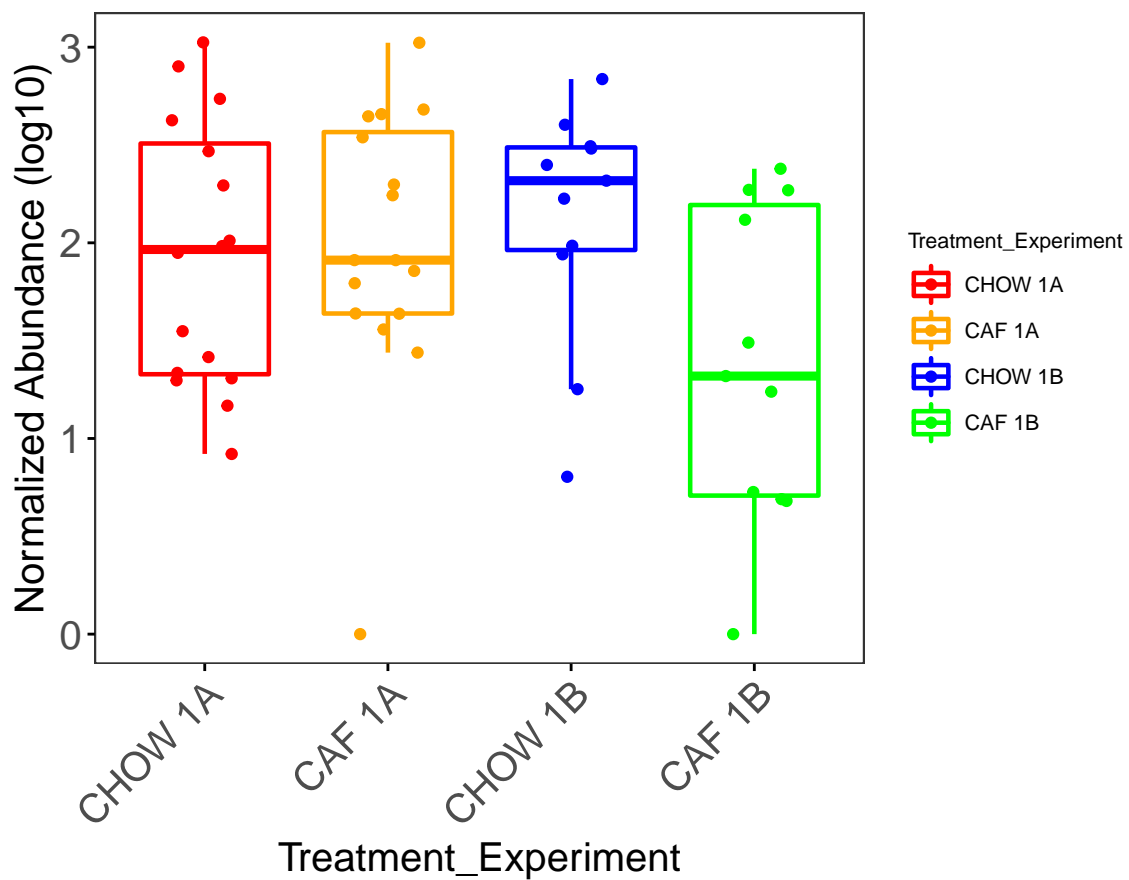

Bacteroidetes.D.2\_\_Bacteroidia.D.3\_\_Bacteroidales.D.4\_\_Tannerellaceae.D.5\_\_Parabacteroides  
Experiment 1A FDR = 0.03488  
Experiment 1B FDR = 0.94873

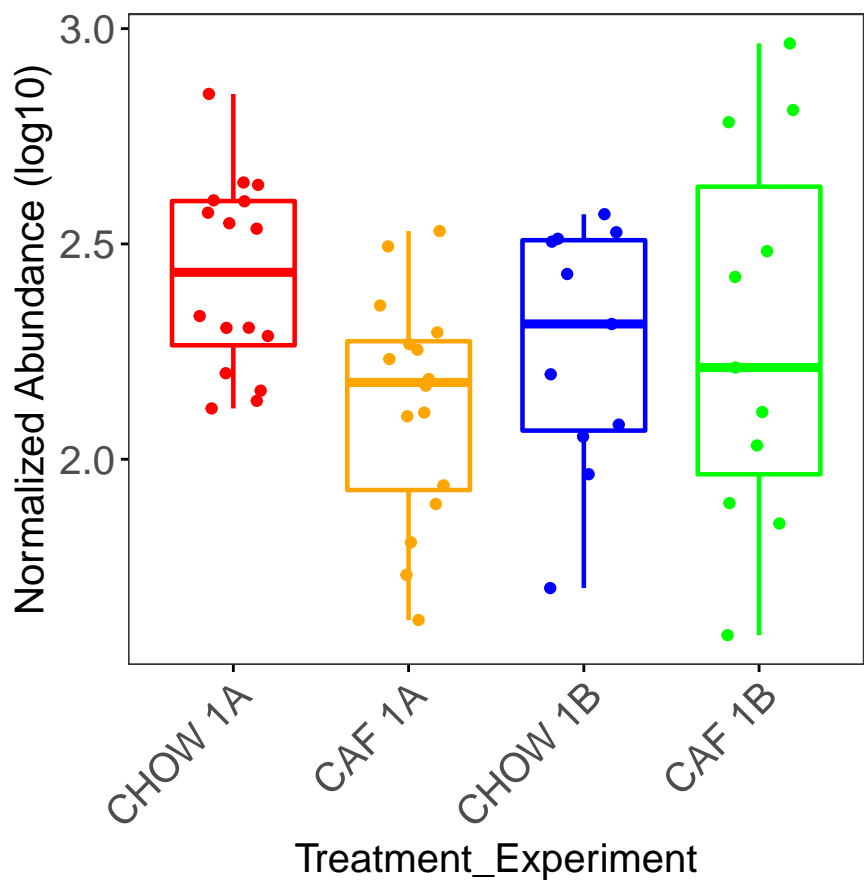

Firmicutes.D.2\_\_Clostridia.D.3\_\_Clostridiales.D.4\_\_Peptostreptococaceae.D.5\_\_Romboutsia  
Experiment 1A FDR = 1  
Experiment 1B FDR = 0.00201

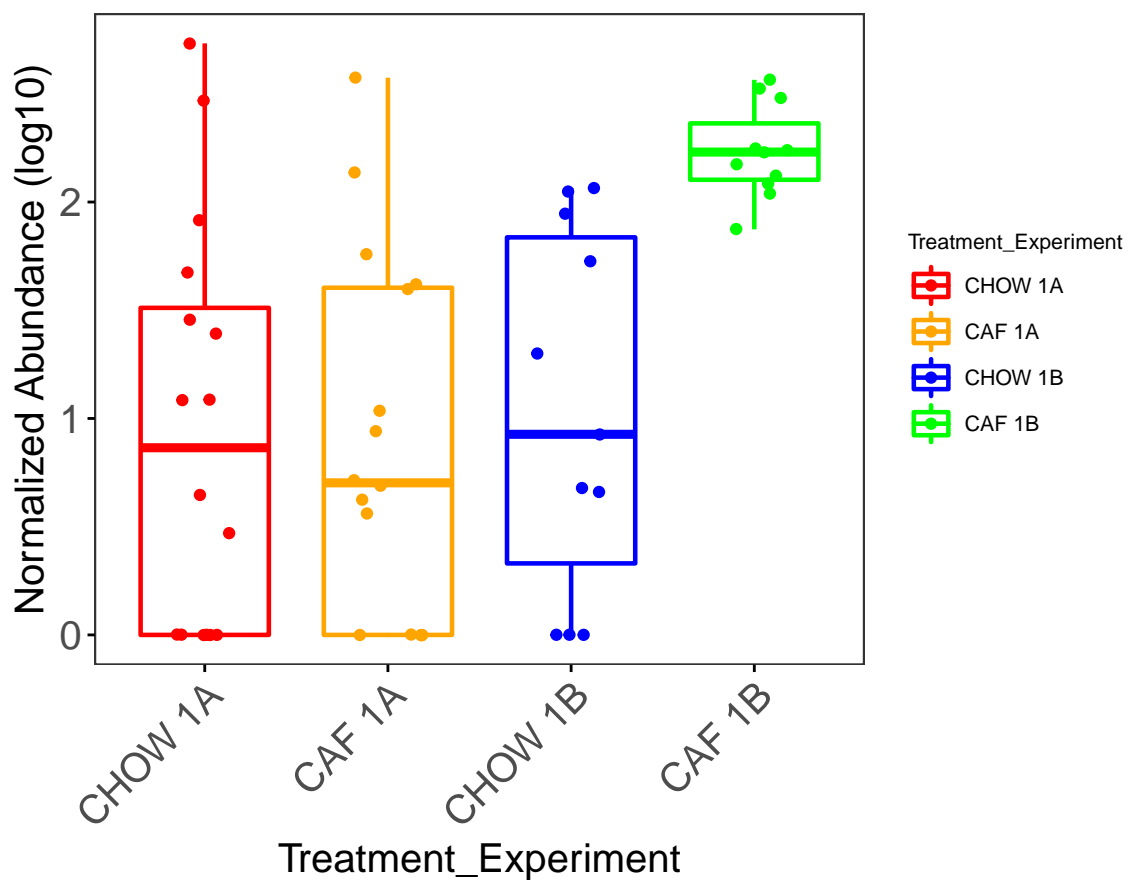

Actinobacteria.D.2\_\_Actinobacteria.D.3\_\_Bifidobacteriales.D.4\_\_Bifidobacteriaceae.D.5\_\_Bifidobacterium  
Experiment 1A FDR = 0.65848  
Experiment 1B FDR = 0.00077

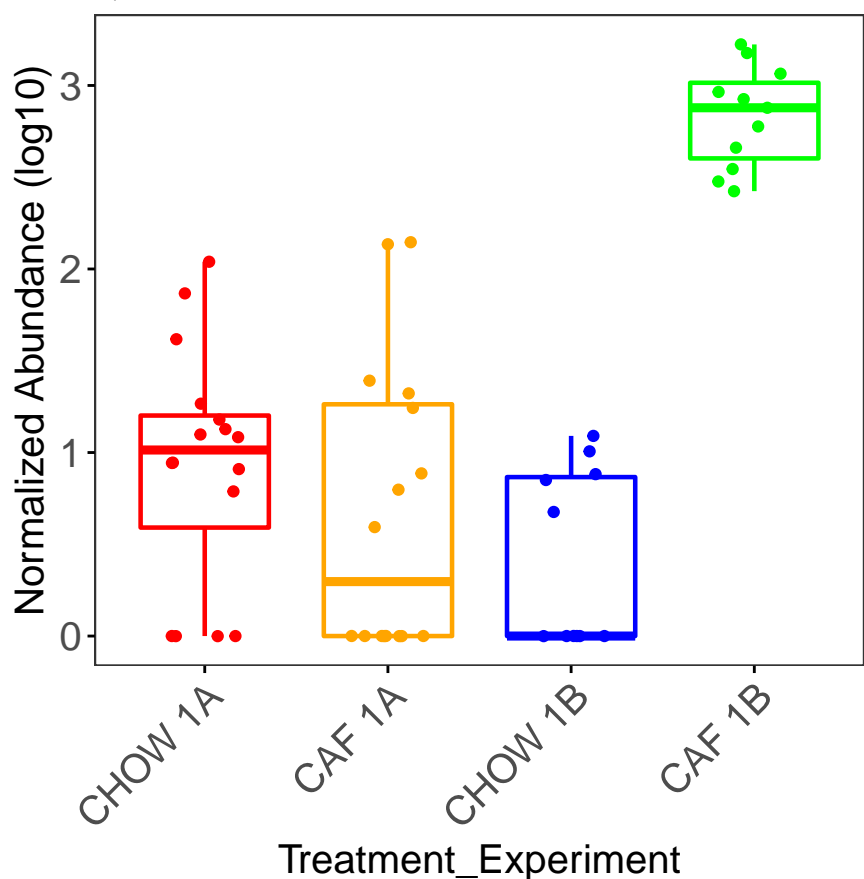

Bacteroidetes.D.2\_\_Bacteroidia.D.3\_\_Bacteroidales.D.4\_\_Prevotellaceae.D.5\_\_Prevotellaceae UCG-001  
Experiment 1A FDR = 0.99386  
Experiment 1B FDR = 0.0048

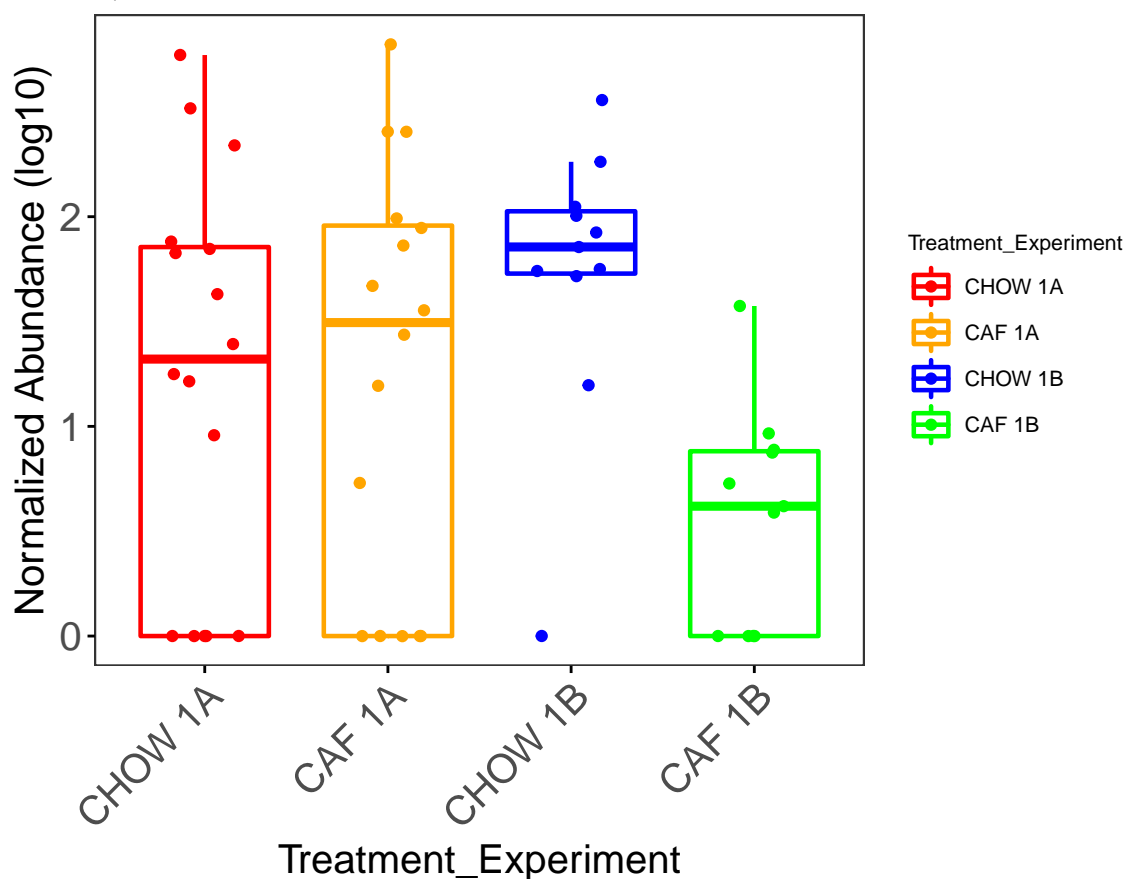

Proteobacteria.D.2\_\_Deltaproteobacteria.D.3\_\_Desulfovibrionales.D.4\_\_Desulfovibrionaceae.D.5\_\_Desulfovibrio  
Experiment 1A FDR = 1  
Experiment 1B FDR = 0.03643

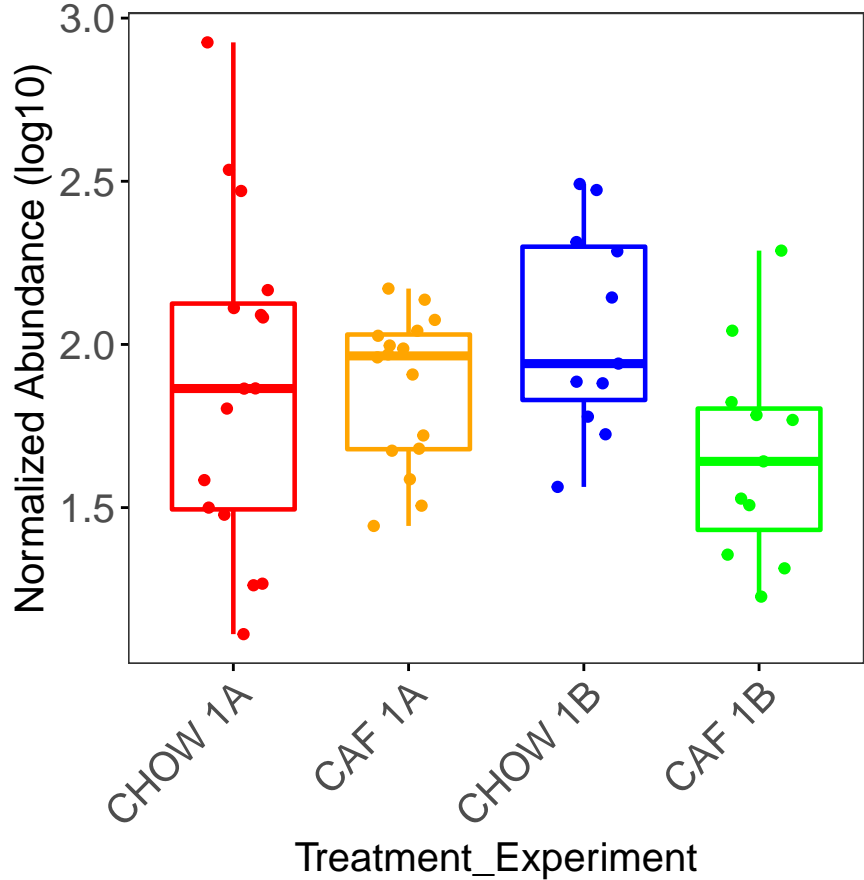

Firmicutes.D.2\_\_Erysipelotrichia.D.3\_\_Erysipelotrichales.D.4\_\_Erysipelotrichaceae.D.5\_\_Faecalibaculum  
Experiment 1A FDR = 0.47521  
Experiment 1B FDR = 0.00077

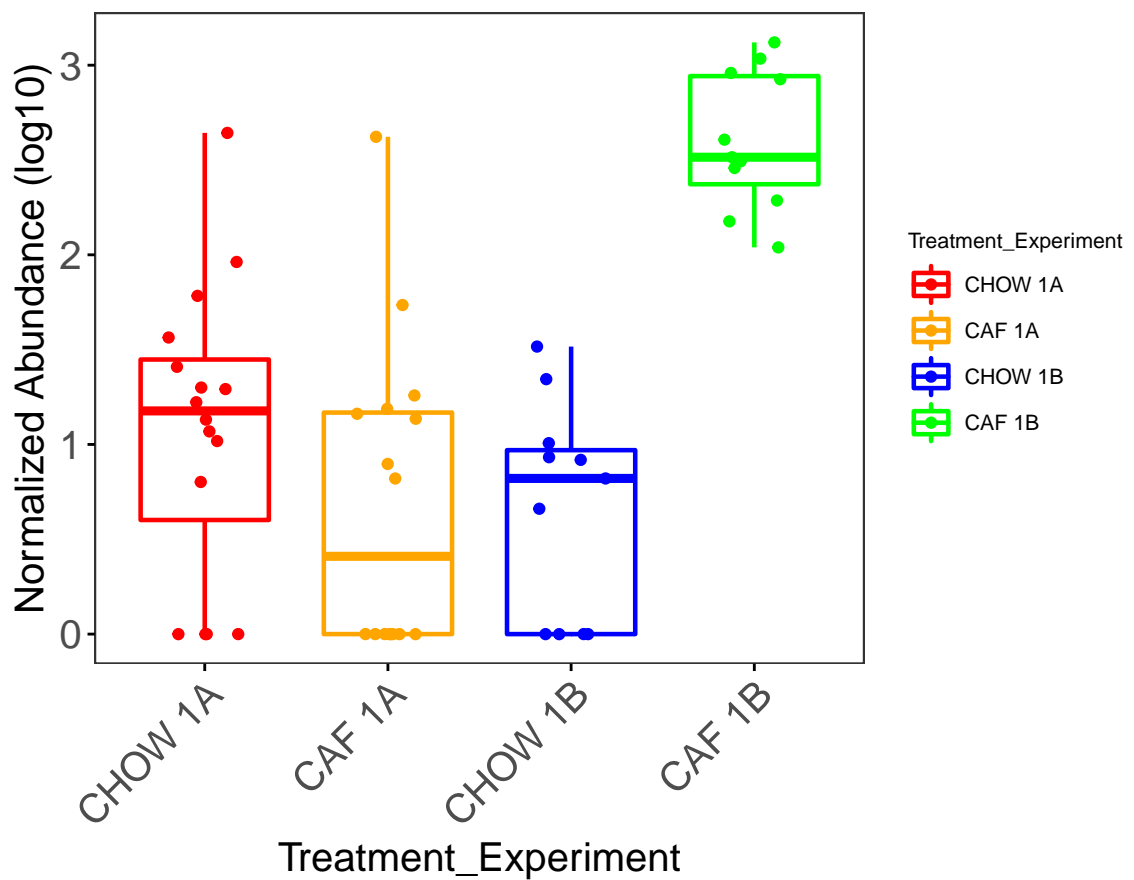

Firmicutes.  
Experiment 1A FDR = 0.06952  
Experiment 1B FDR = 0.70828

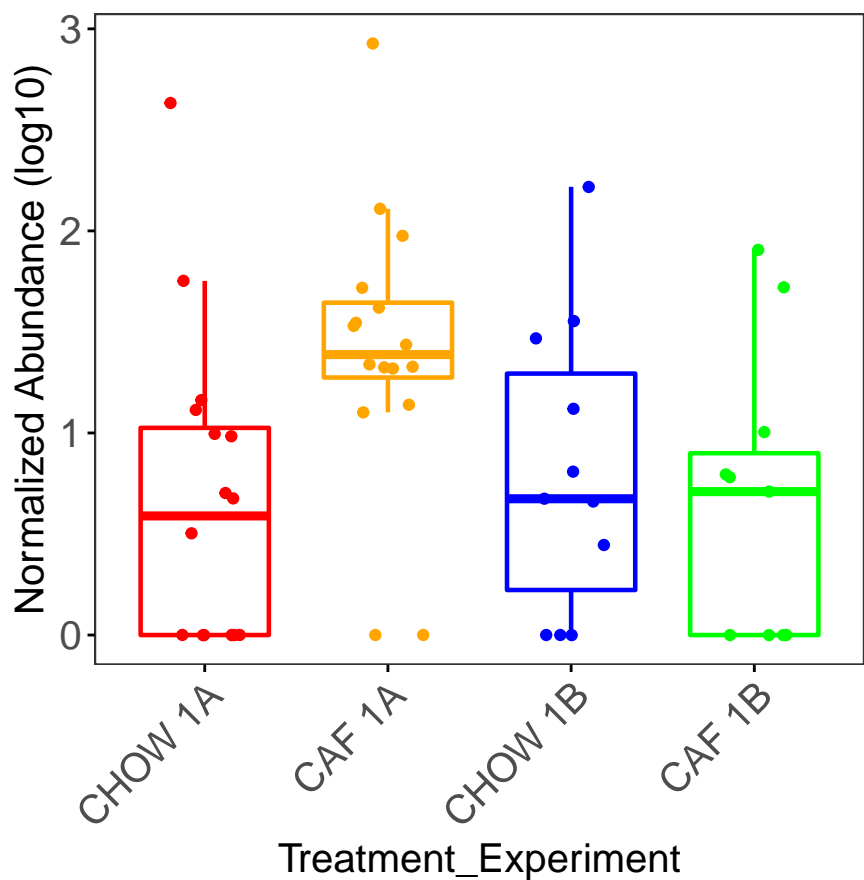

Bacteroidetes.D\_2\_Bacteroidia.D\_3\_Bacteroidales.D\_4\_Prevotellaceae.D\_5\_Paraprevotella  
Experiment 1A FDR = 0.30585  
Experiment 1B FDR = 0.00289

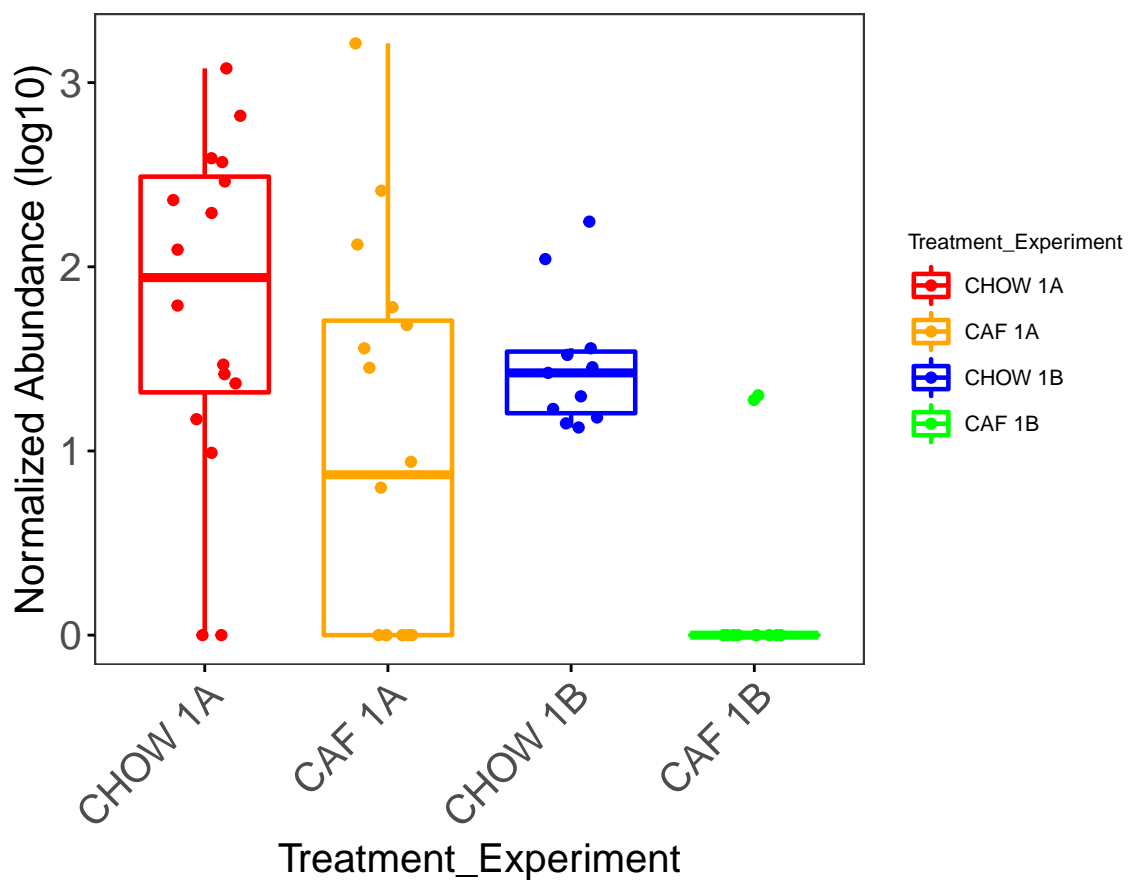

Firmicutes.D\_2\_Clostridia.D\_3\_Clostridiales.D\_4\_Lachnospiraceae.D\_5\_Roseburia  
Experiment 1A FDR = 0.81073  
Experiment 1B FDR = 0.03206

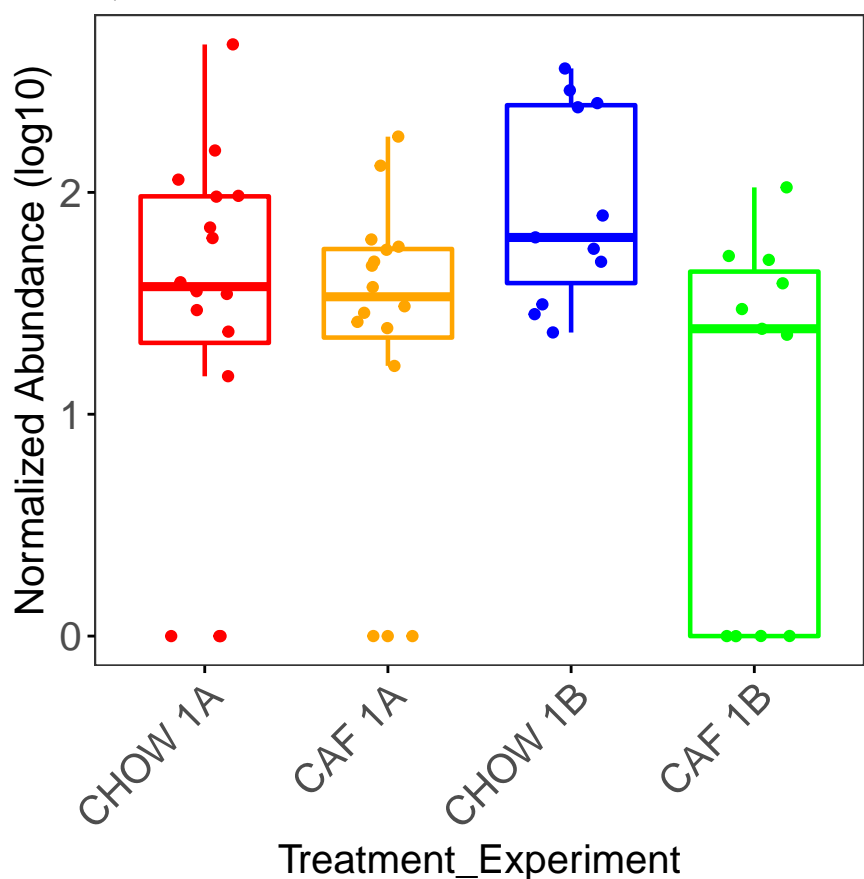

Actinobacteria.D\_2\_Coriobacteriia.D\_3\_Coriobacteriales.D\_4\_Atopobiaceae.D\_5\_Coriobacteriaceae UCG-002  
Experiment 1A FDR = 1  
Experiment 1B FDR = 0.00077

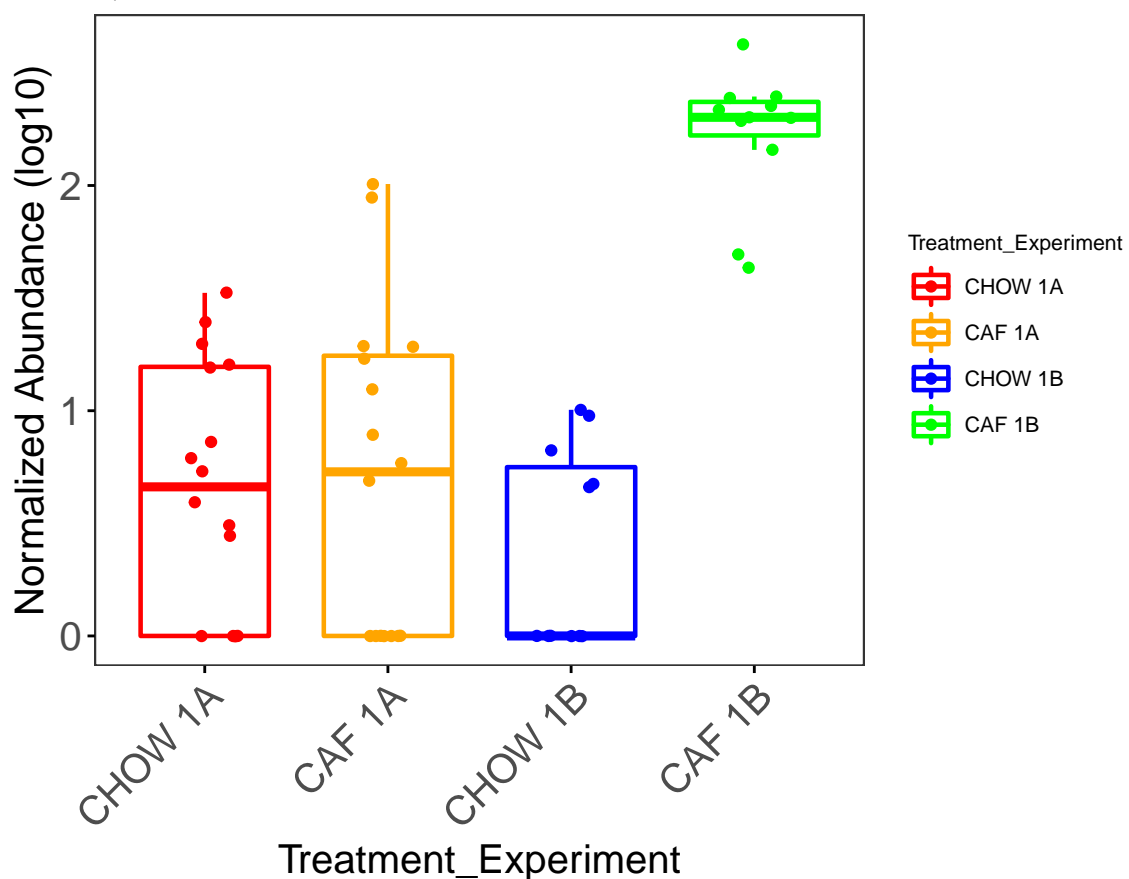

Proteobacteria.D\_2\_Gammaproteobacteria.D\_3\_Betaproteobacteriales.  
Experiment 1A FDR = 0.00022  
Experiment 1B FDR = 0.00067

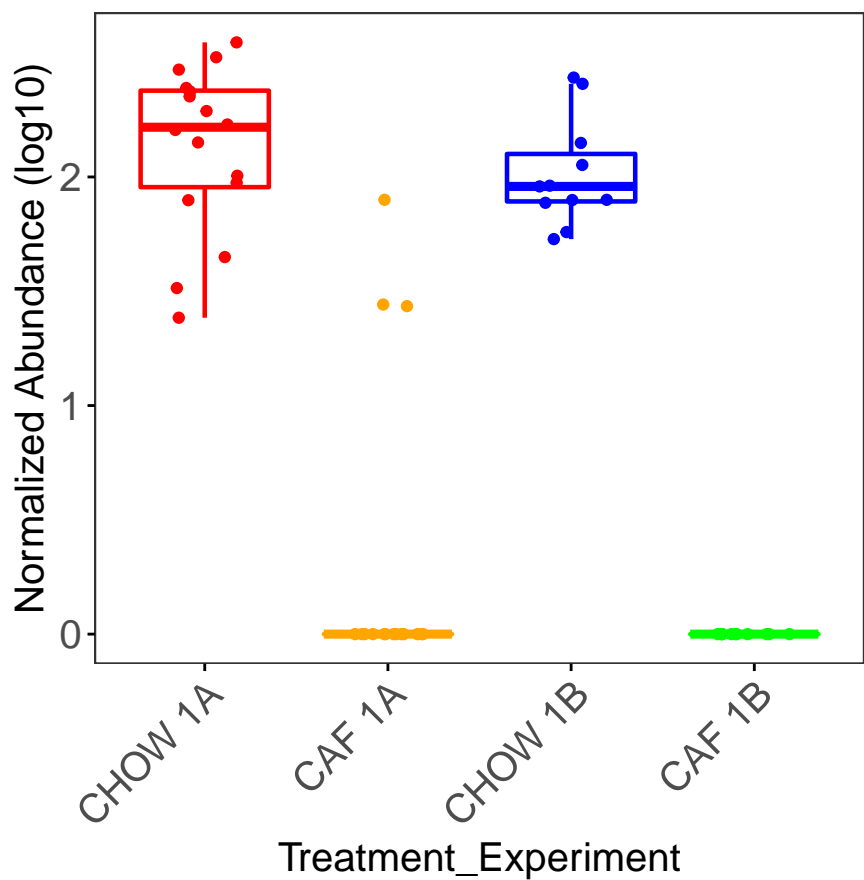

Firmicutes.D\_2\_Clostridia.D\_3\_Clostridiales.D\_4\_Clostridiaceae 1.D\_5\_Clostridium sensu stricto 1  
Experiment 1A FDR = 0.51666  
Experiment 1B FDR = 0.00074

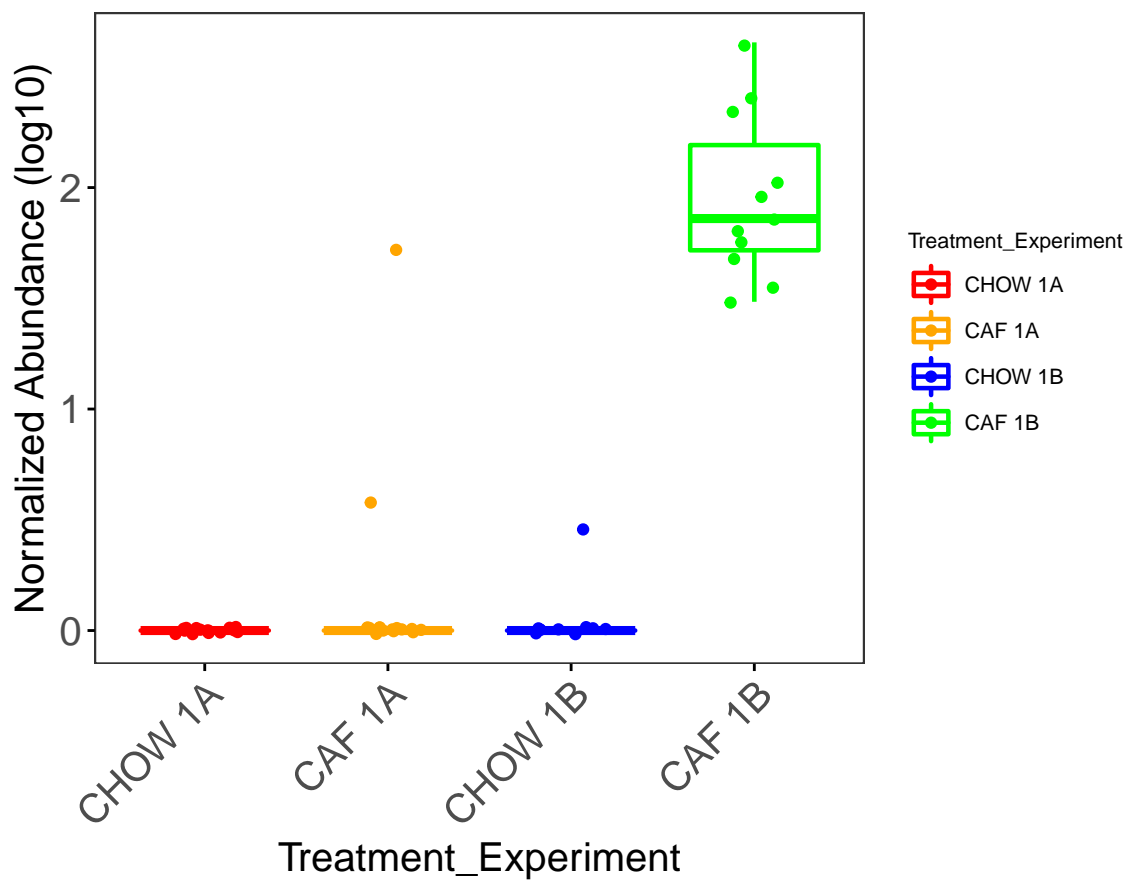

Actinobacteria.D.2\_\_Coriobacteriia.D.3\_\_Coriobacteriales.D.4\_\_uncultured.D.5\_\_uncultured bacterium  
Experiment 1A FDR = 0.82629  
Experiment 1B FDR = 0.00067

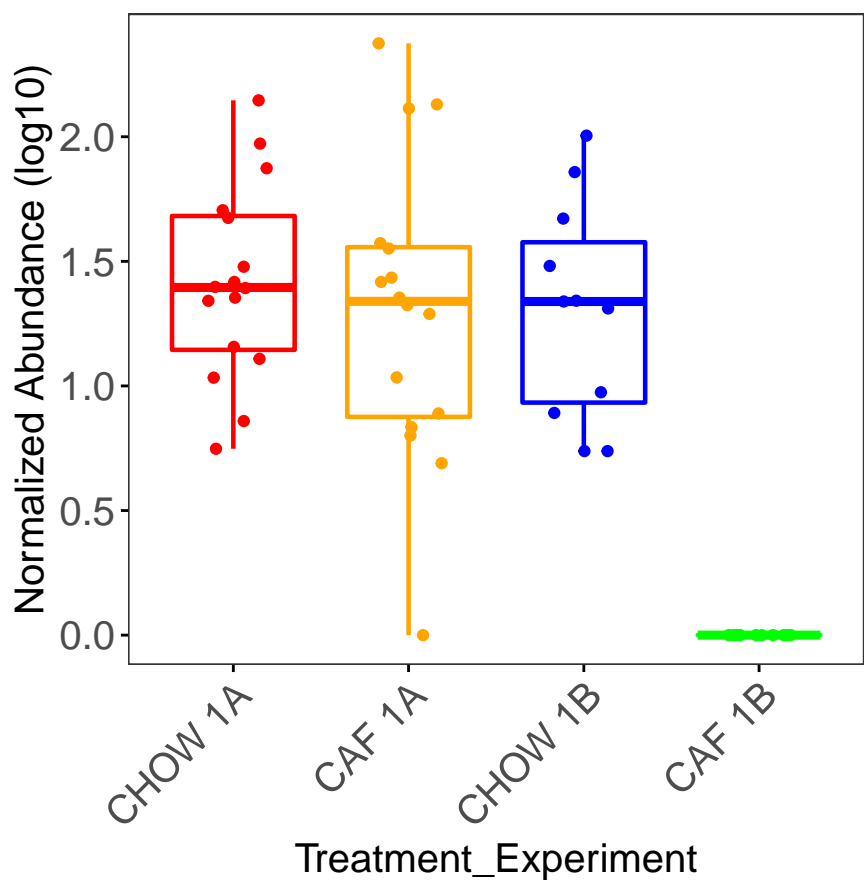

Firmicutes.D.2\_\_Clostridia.D.3\_\_Clostridiales.D.4\_\_Ruminococaceae.D.5\_\_Ruminiclostridium 9  
Experiment 1A FDR = 0.68304  
Experiment 1B FDR = 0.06989

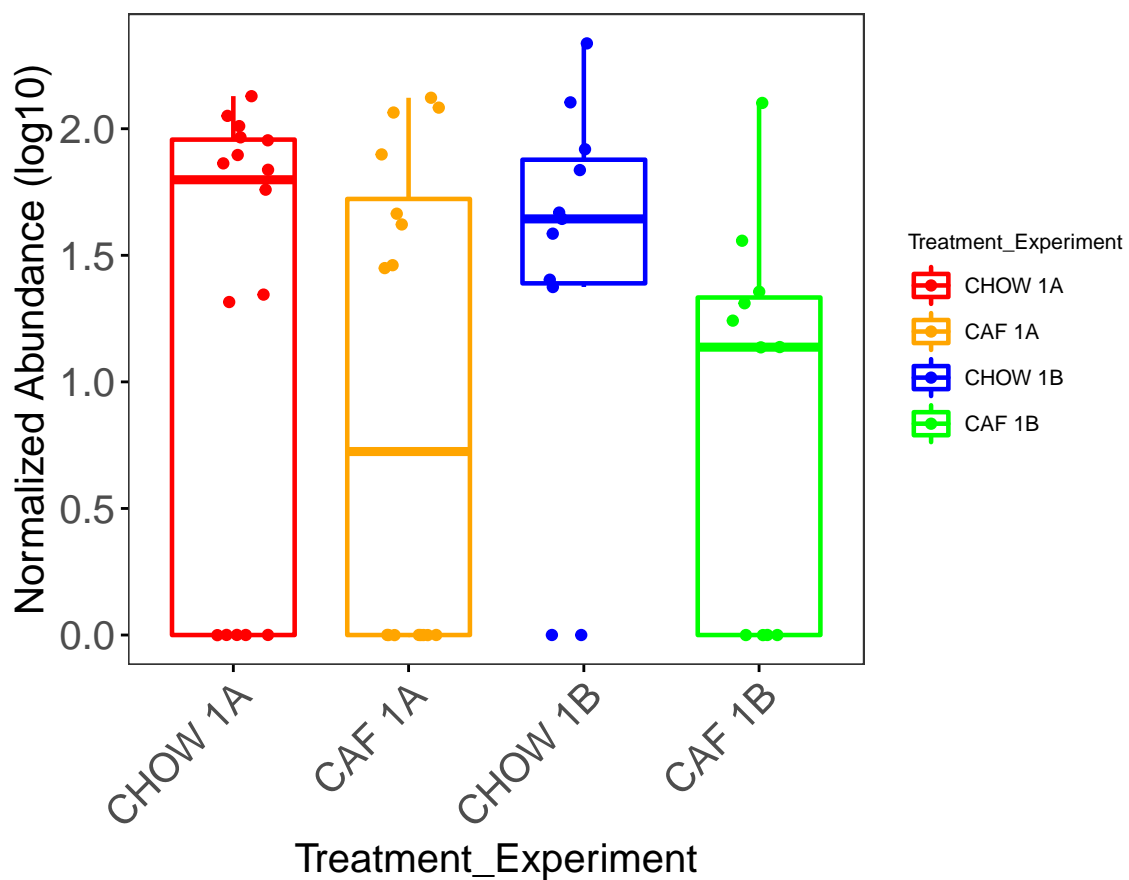

Actinobacteria.D.2\_\_Coriobacteriia.D.3\_\_Coriobacteriales.D.4\_\_Eggerthellaceae\_\_\_  
Experiment 1A FDR = 1  
Experiment 1B FDR = 0.0023

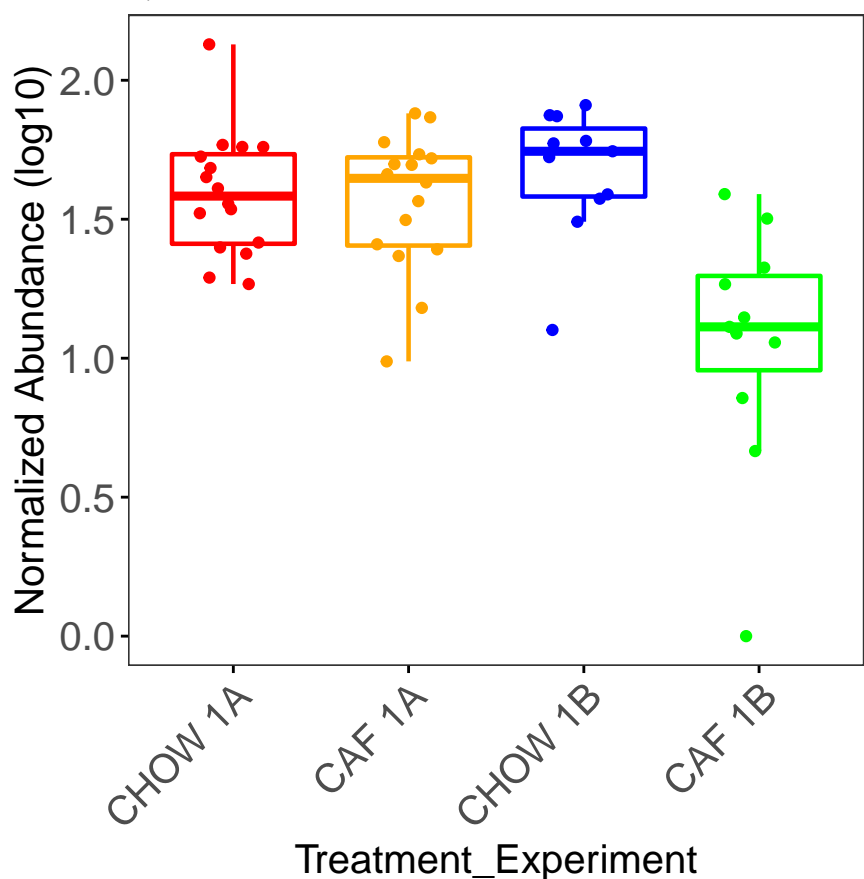

Firmicutes.D.2\_\_Bacilli.D.3\_\_Lactobacillales.D.4\_\_Streptococcaceae.D.5\_\_Streptococcus  
Experiment 1A FDR = 0.4596  
Experiment 1B FDR = 0.06573

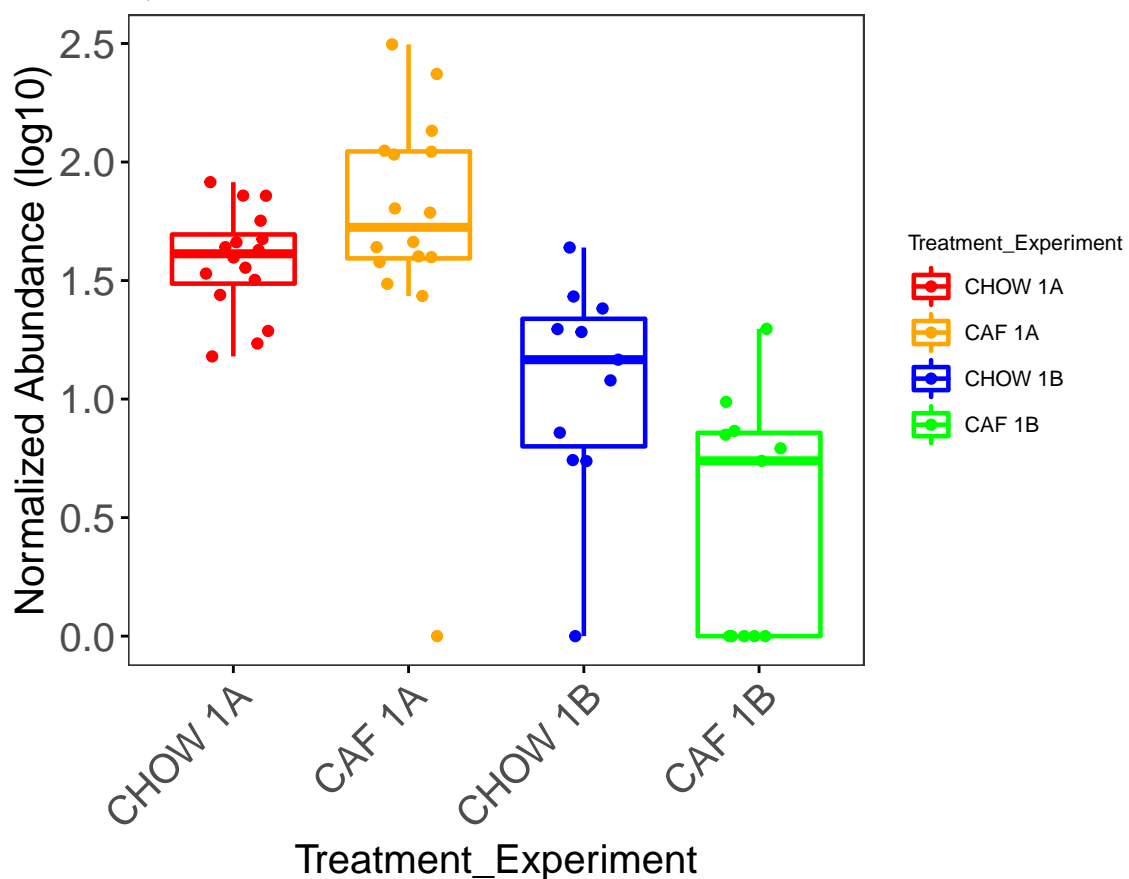

Firmicutes.D.2\_\_Bacilli.D.3\_\_Lactobacillales.D.4\_\_Streptococcaceae.D.5\_\_Lactococcus  
Experiment 1A FDR = 1  
Experiment 1B FDR = 0.00201

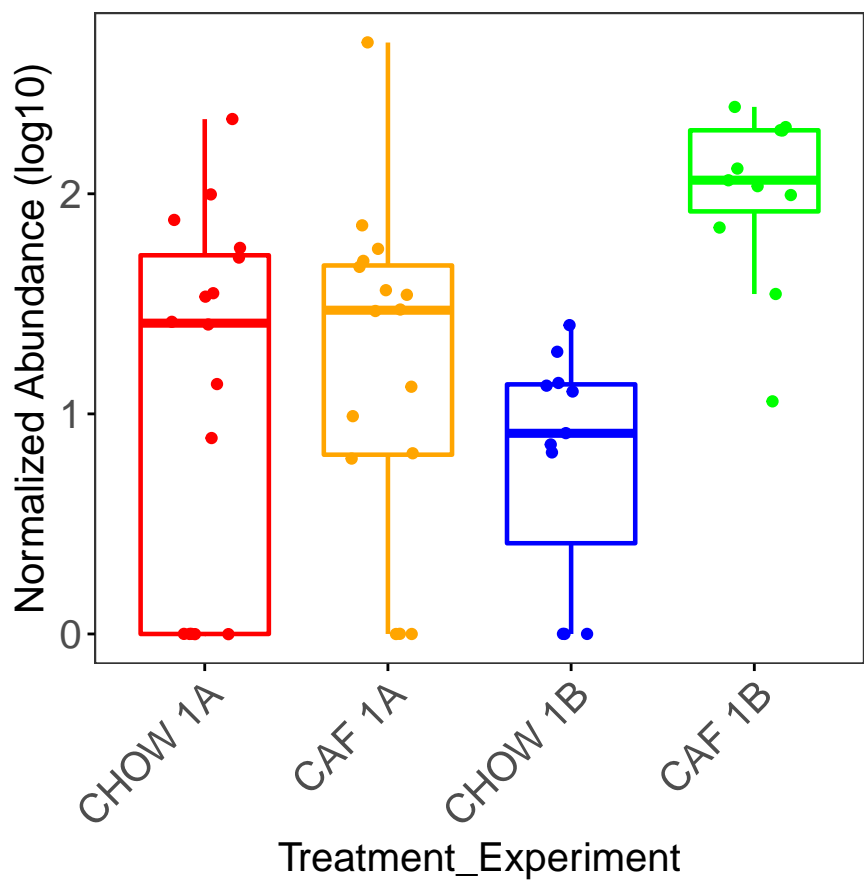

Proteobacteria.D.2\_\_Deltaproteobacteria.D.3\_\_Desulfovibrionales.D.4\_\_Desulfovibrionaceae\_\_\_  
Experiment 1A FDR = 0.30585  
Experiment 1B FDR = 0.09526

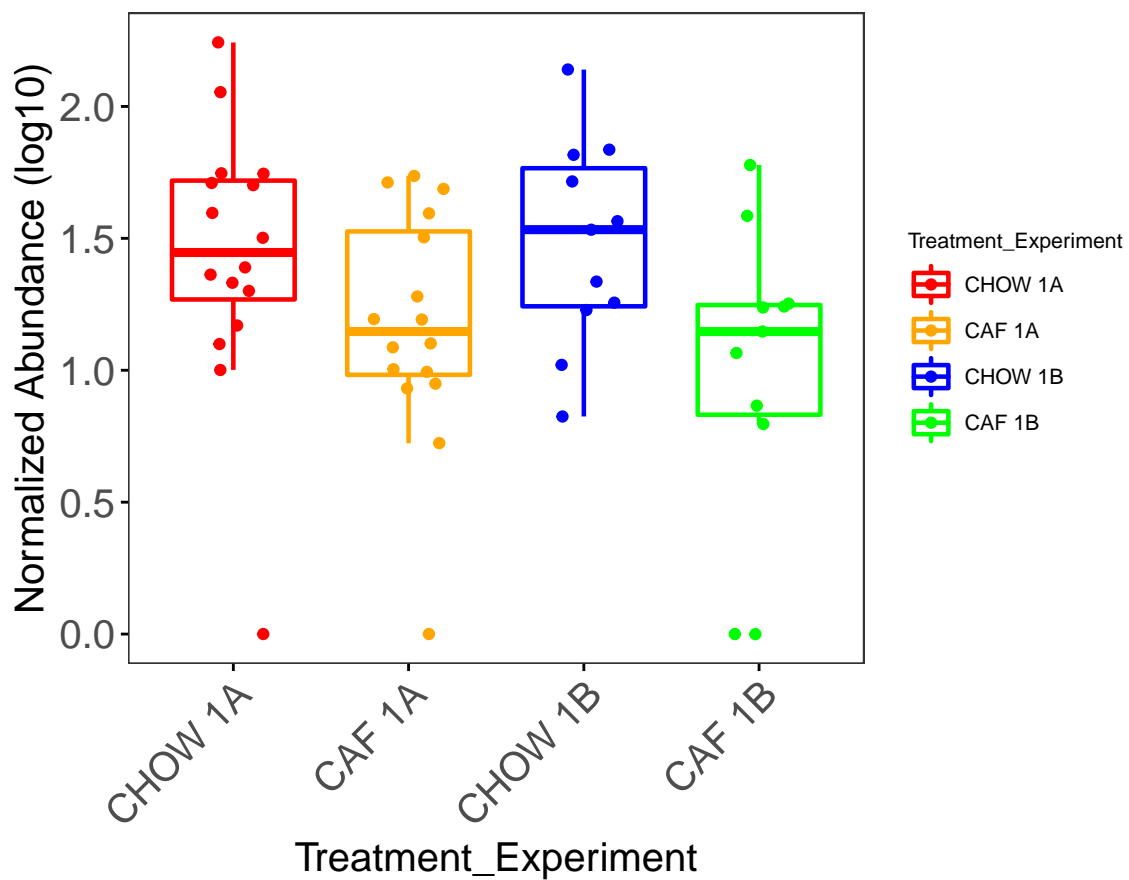

Firmicutes.D.2\_\_Clostridia.D.3\_\_Clostridiales.D.4\_\_Family XIII.\_\_\_\_  
Experiment 1A FDR = 0.65848  
Experiment 1B FDR = 0.04279

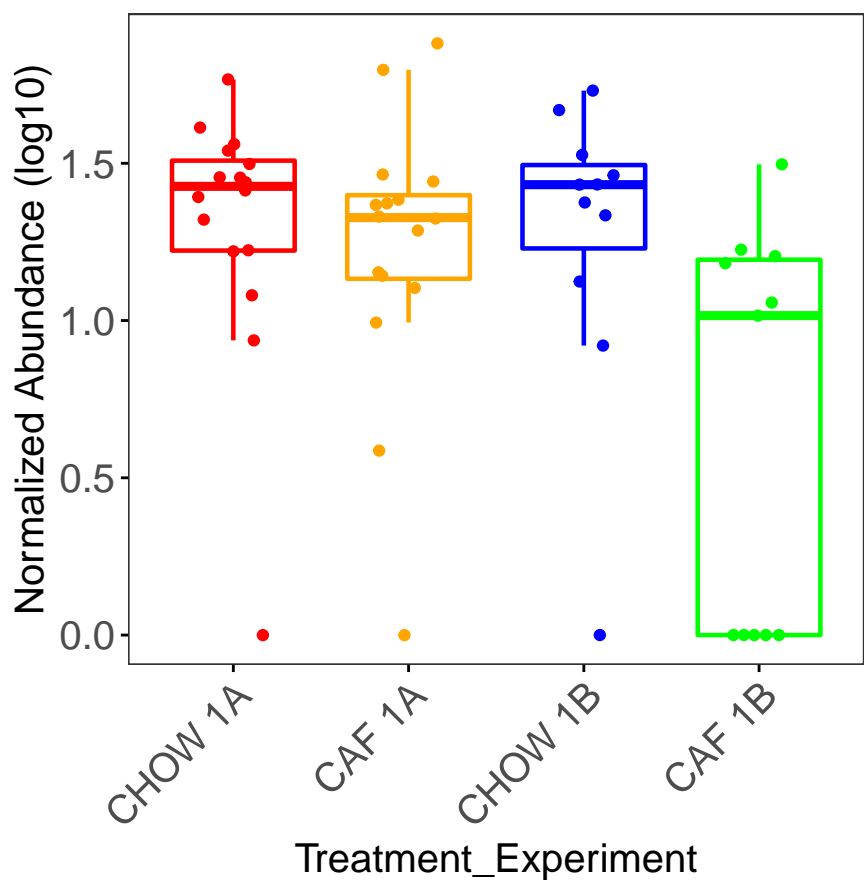

Firmicutes.D.2\_\_Clostridia.D.3\_\_Clostridiales.D.4\_\_Lachnospiraceae.D.5\_\_[Ruminococcus] gnavus group  
Experiment 1A FDR = 0.68304  
Experiment 1B FDR = 0.05818

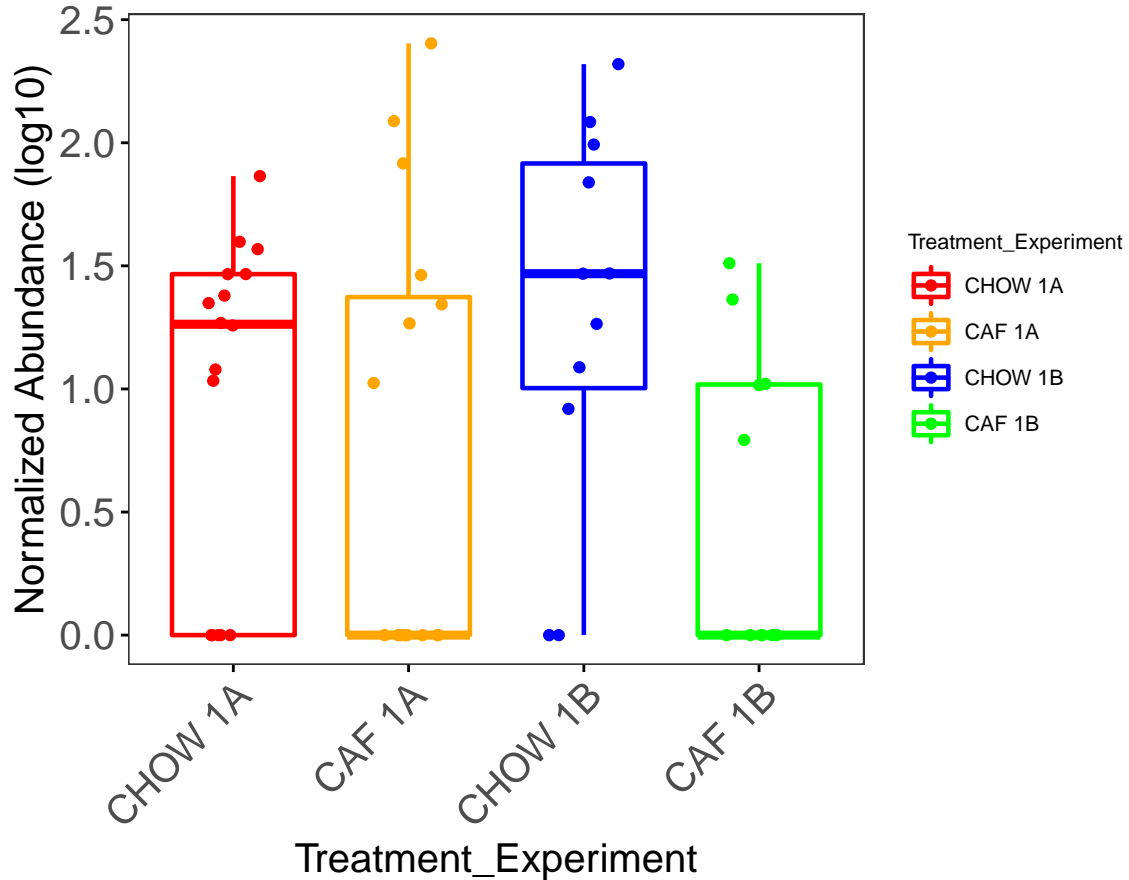

Firmicutes.D.2\_\_Erysipelotrichia.D.3\_\_Erysipelotrichales.D.4\_\_Erysipelotrichaceae.\_\_\_\_  
Experiment 1A FDR = 0.48961  
Experiment 1B FDR = 0.00201

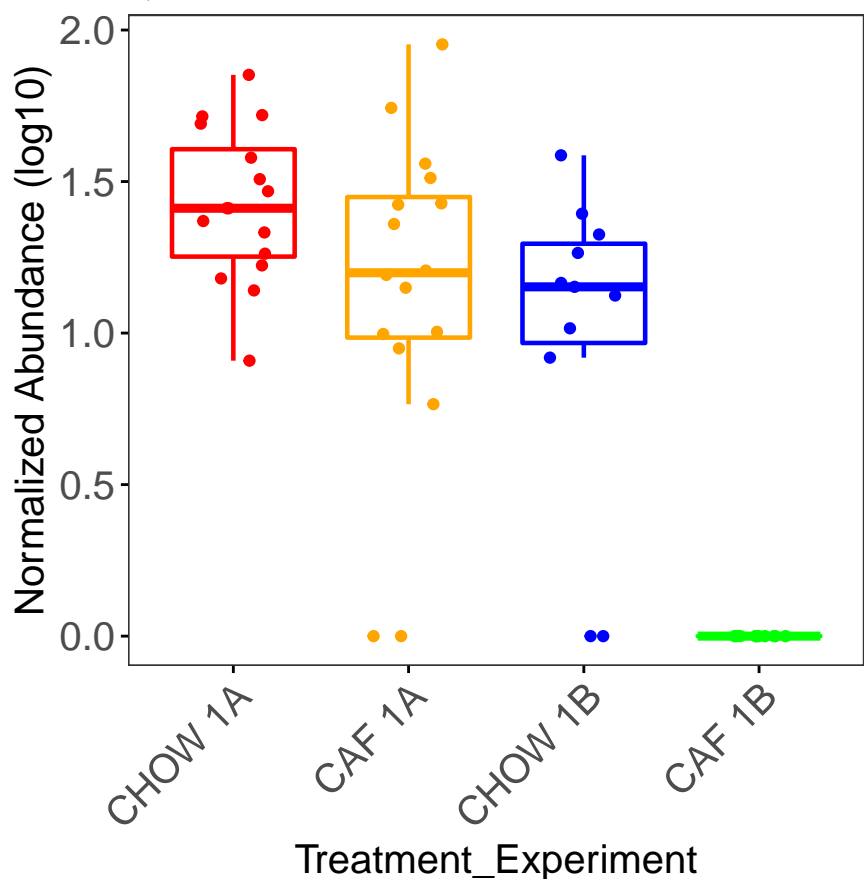

Firmicutes.D.2\_\_Clostridia.D.3\_\_Clostridiales.D.4\_\_Lachnospiraceae.D.5\_\_Sellimonas  
Experiment 1A FDR = 0.25718  
Experiment 1B FDR = 0.06573

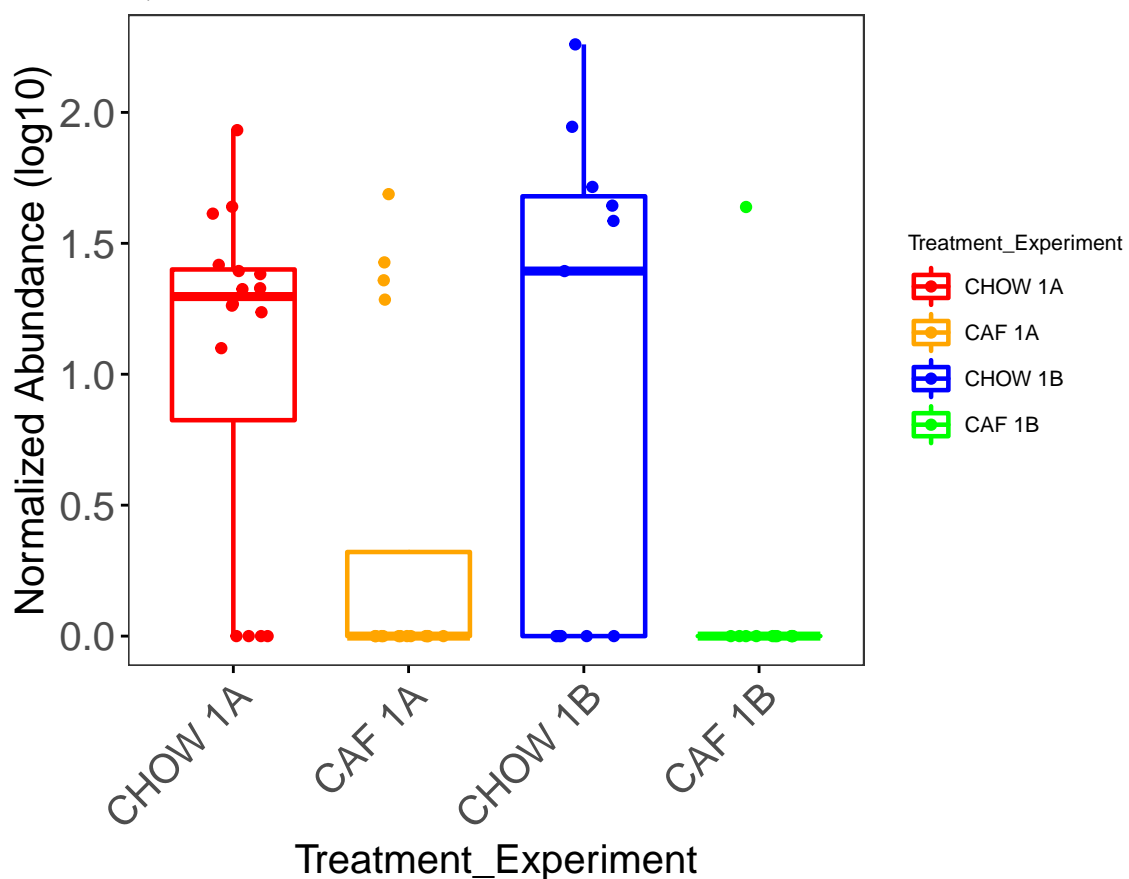

Firmicutes.D.2\_\_Clostridia.D.3\_\_Clostridiales.D.4\_\_Ruminococcaceae.D.5\_\_Harryflintia  
Experiment 1A FDR = 0.86171  
Experiment 1B FDR = 0.03461

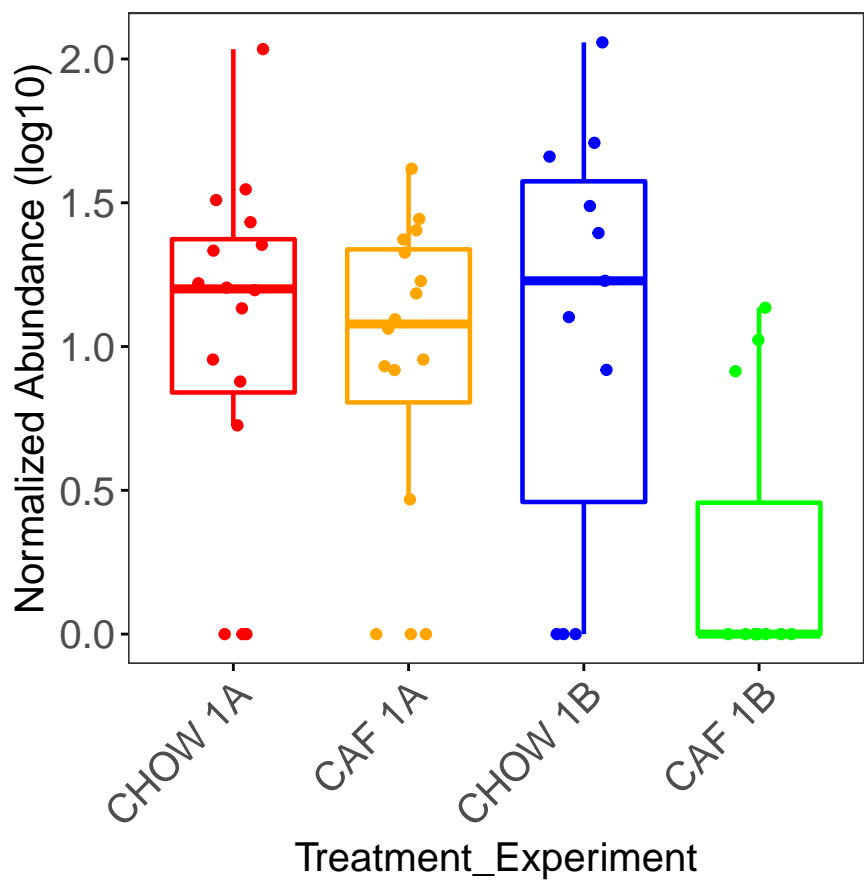

Firmicutes.D.2\_\_Clostridia.D.3\_\_Clostridiales.D.4\_\_Lachnospiraceae.D.5\_\_[Eubacterium] ventriosum group  
Experiment 1A FDR = 0.50959  
Experiment 1B FDR = 0.02455

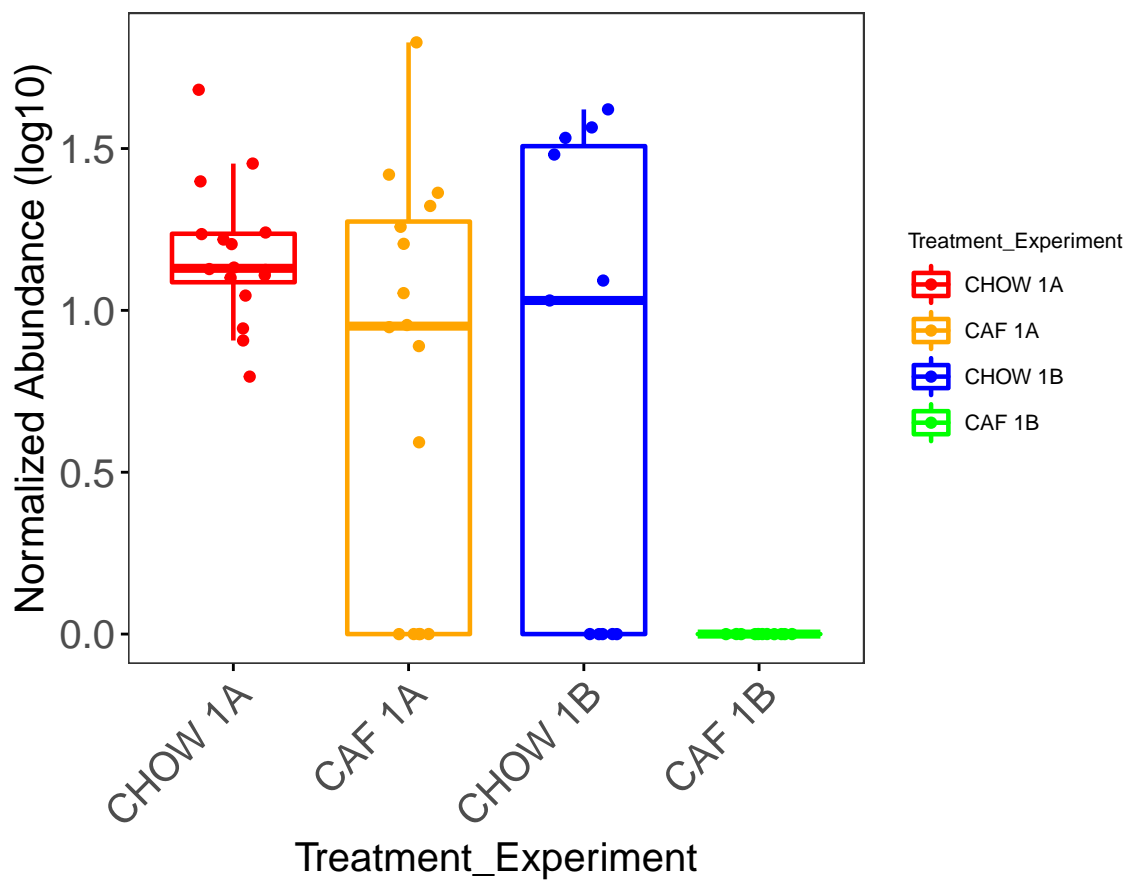

Proteobacteria.D.2\_\_Gammaproteobacteria.D.3\_\_Betaproteobacteriales.D.4\_\_Burkholderiaceae...  
Experiment 1A FDR = 0.01823  
Experiment 1B FDR = 0.29501

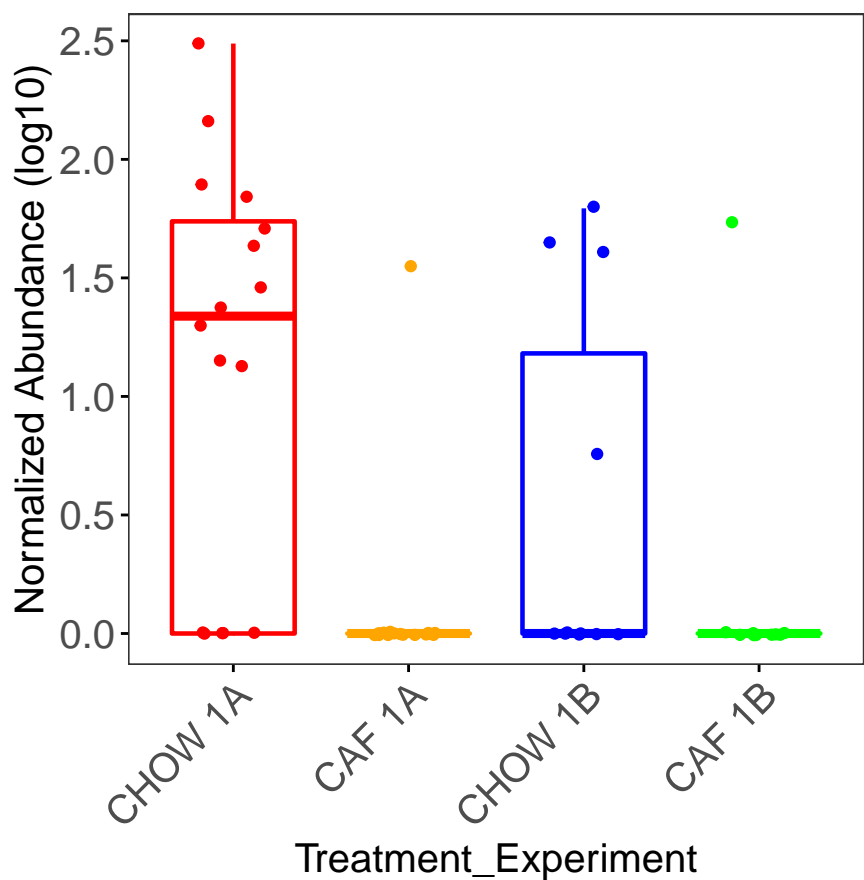

Firmicutes.D.2\_\_Clostridia.D.3\_\_Clostridiales.D.4\_\_Ruminococcaceae.D.5\_\_Candidatus Soleiferrea...  
Experiment 1A FDR = 0.68304  
Experiment 1B FDR = 0.00077

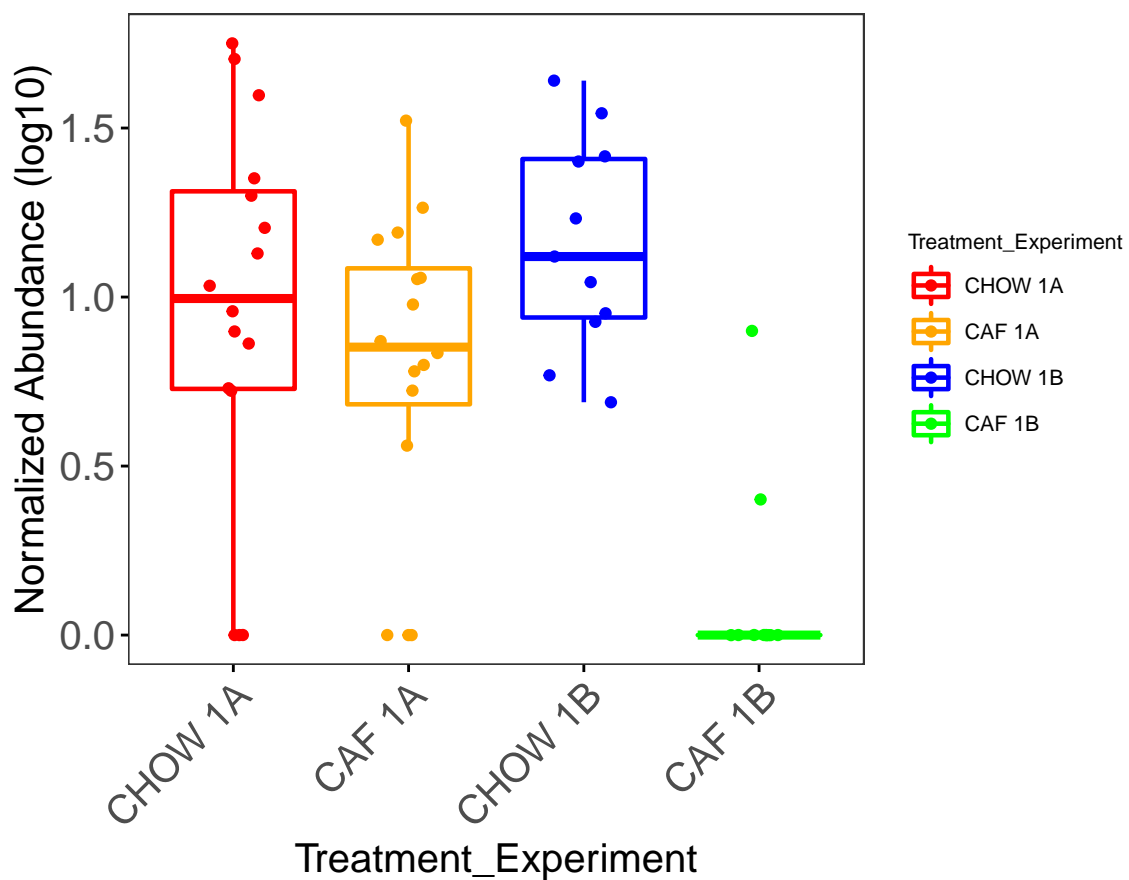

Firmicutes.D.2\_\_Clostridia.D.3\_\_Clostridiales.D.4\_\_Ruminococcaceae.D.5\_\_Negativibacillus...  
Experiment 1A FDR = 0.03488  
Experiment 1B FDR = 0.28428

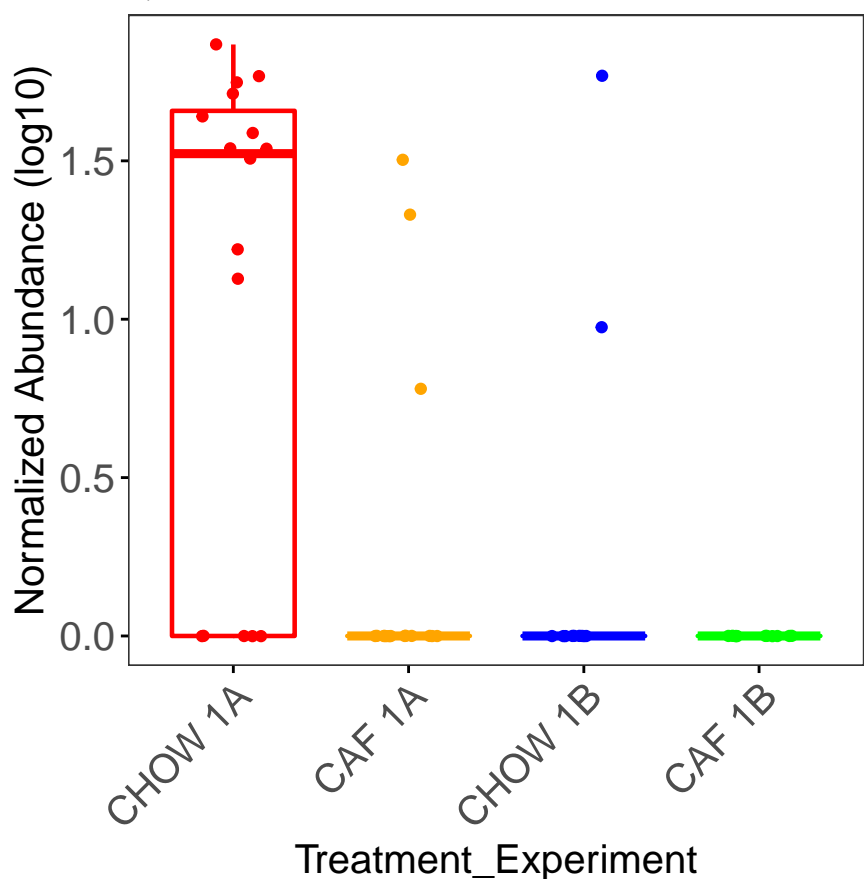

Cyanobacteria.D.2\_\_Melainabacteria.D.3\_\_Gastranaerophilales...  
Experiment 1A FDR = 0.79901  
Experiment 1B FDR = 0.0315

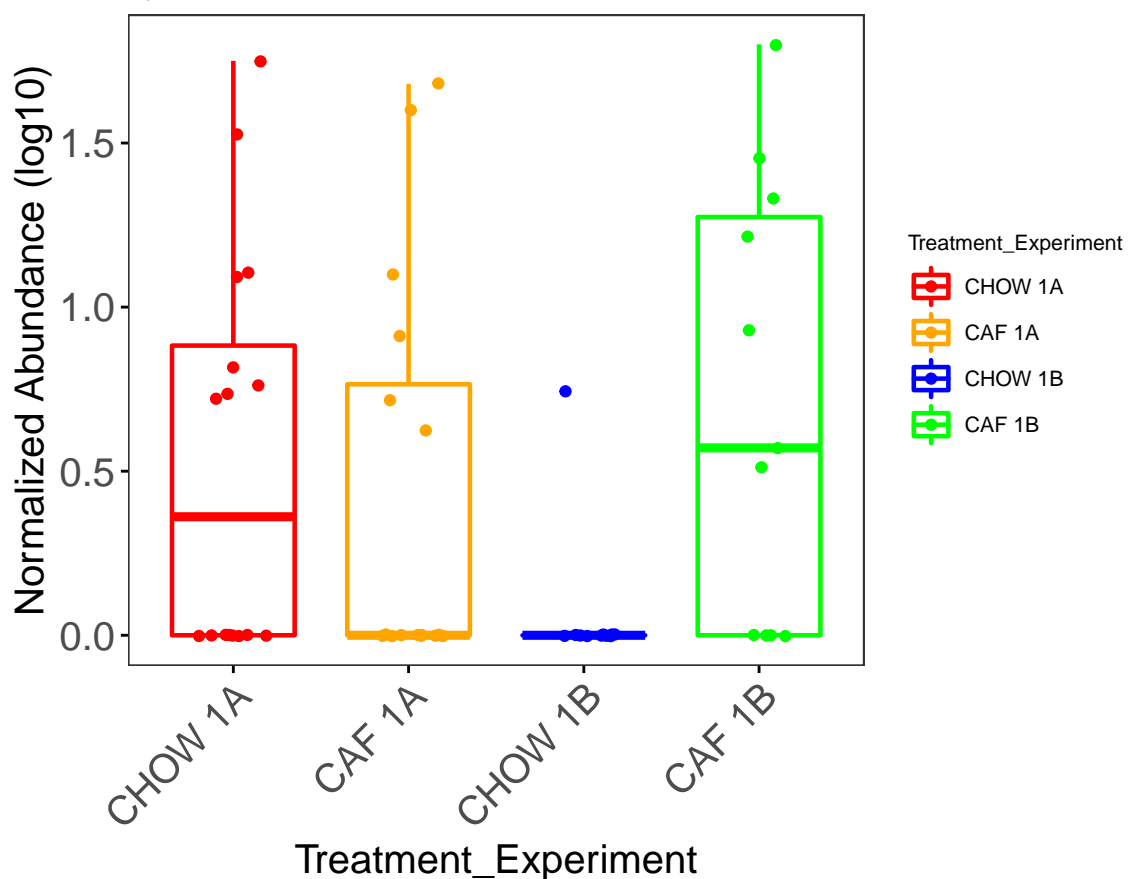

Firmicutes.D.2\_\_Clostridia.D.3\_\_Clostridiales.D.4\_\_Family XIII.D.5\_\_Family XIII UCG-001...  
Experiment 1A FDR = 1  
Experiment 1B FDR = 0.08443

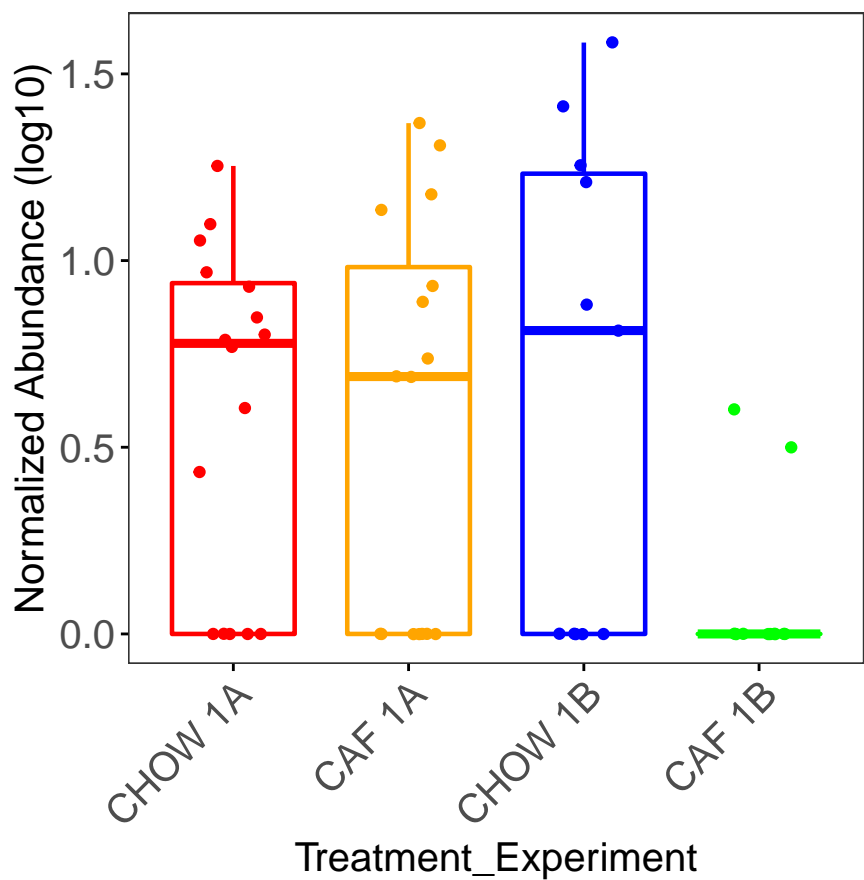

Actinobacteria.D.2\_\_Coriobacteria.D.3\_\_Coriobacteriales.D.4\_\_Coriobacteriales Incertae Sedis.D.5\_\_uncultured...  
Experiment 1A FDR = 0.70708  
Experiment 1B FDR = 0.0048

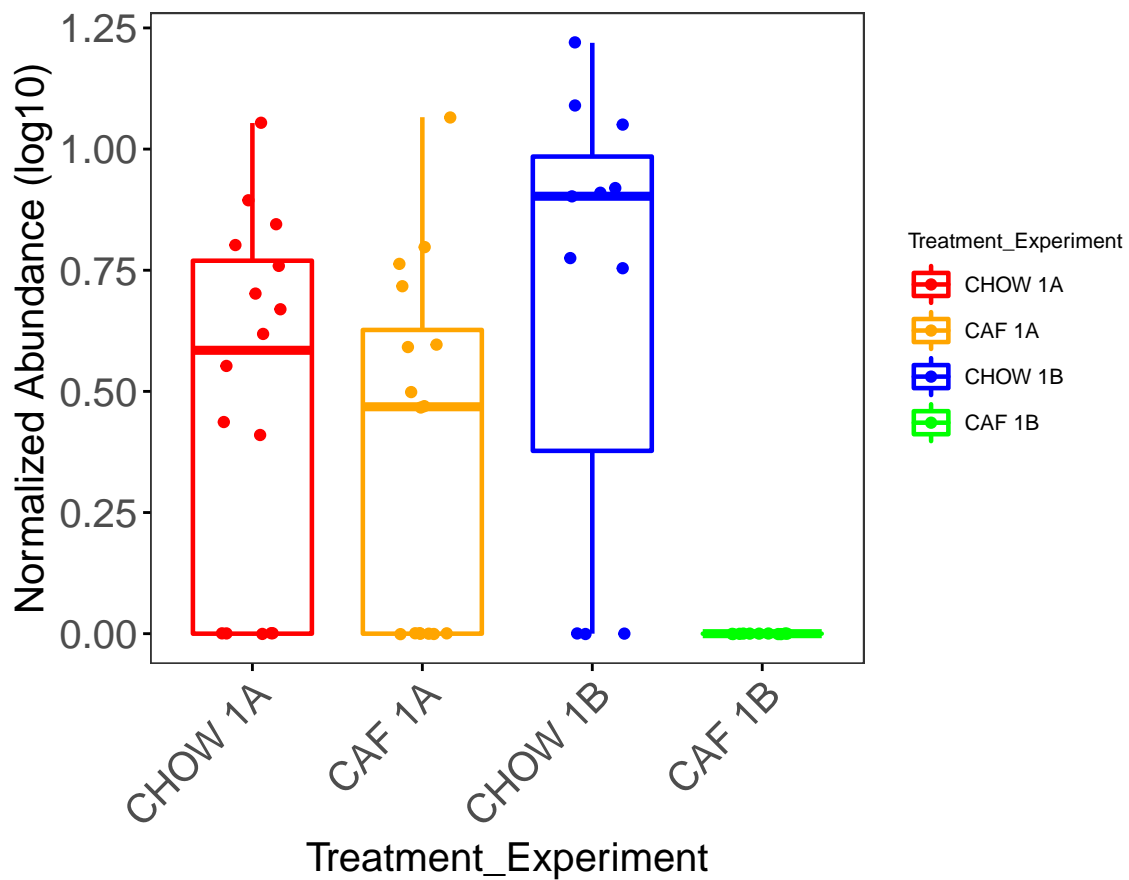



Firmicutes.D.2\_\_Clostridia.D.3\_\_Clostridiales.D.4\_\_Ruminococcaceae.D.5\_\_GCA-900066225  
Experiment 1A FDR = 0.80513  
Experiment 1B FDR = 0.02778

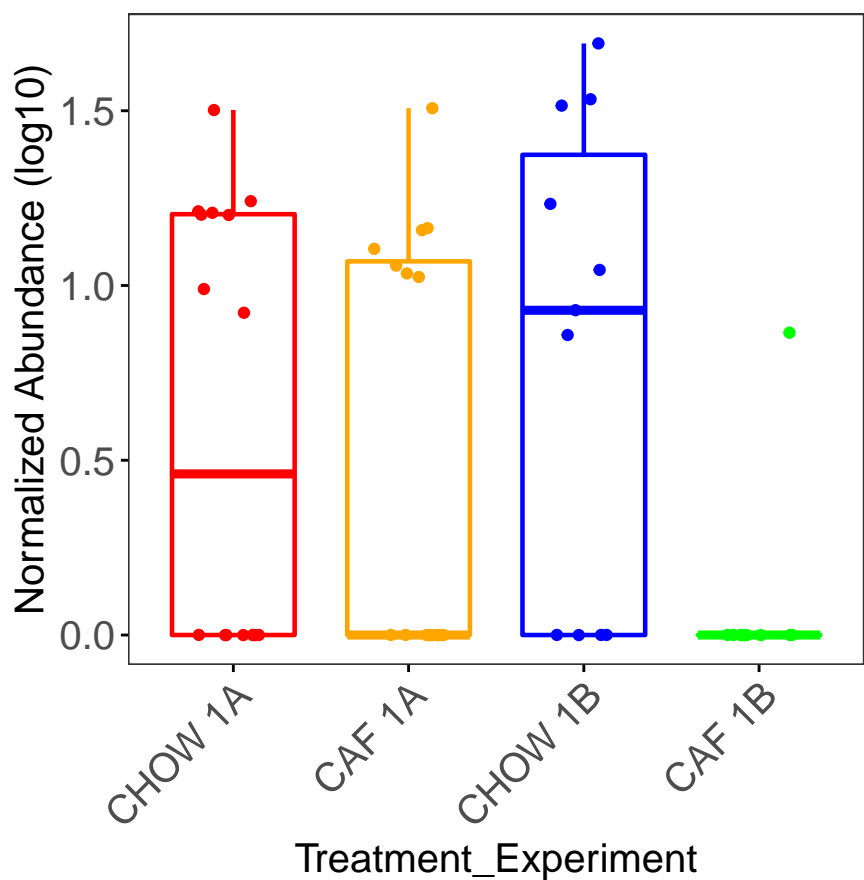

Treatment\_Experiment  
CHOW 1A  
CAF 1A  
CHOW 1B  
CAF 1B

Firmicutes.D.2\_\_Clostridia.D.3\_\_Clostridiales.D.4\_\_Lachnospiraceae.D.5\_\_Tyzzerella  
Experiment 1A FDR = 0.79004  
Experiment 1B FDR = 0.02797

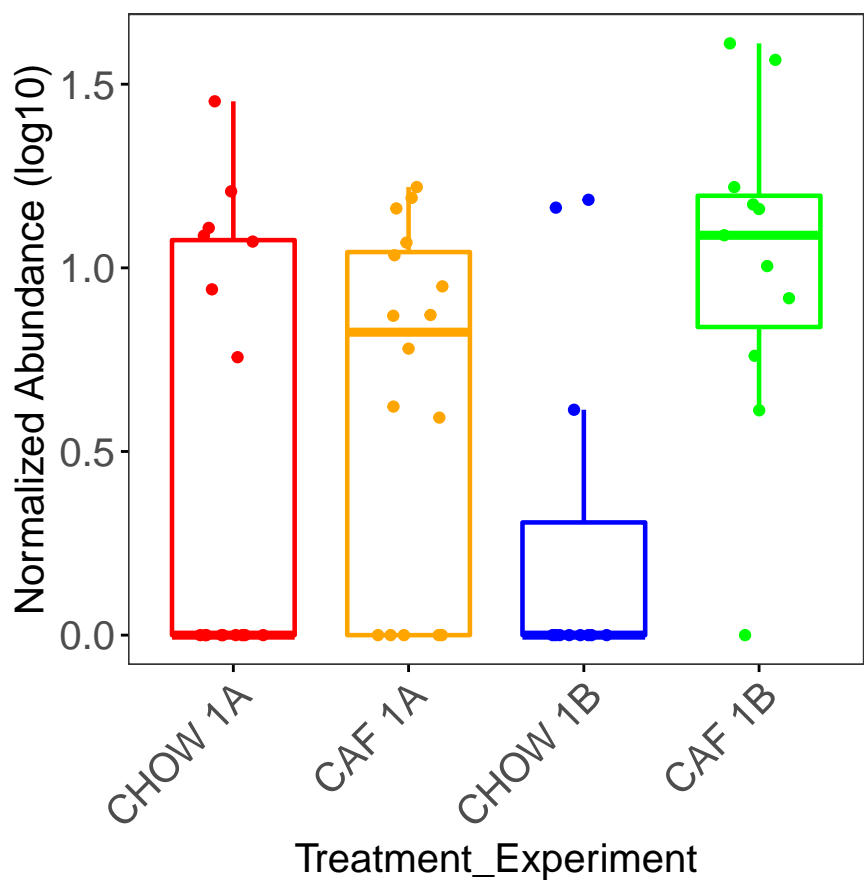

Treatment\_Experiment  
CHOW 1A  
CAF 1A  
CHOW 1B  
CAF 1B

Firmicutes.D.2\_\_Clostridia.D.3\_\_Clostridiales.D.4\_\_Eubacteriaceae.D.5\_\_Anaerofustis  
Experiment 1A FDR = 0.70708  
Experiment 1B FDR = 0.02455

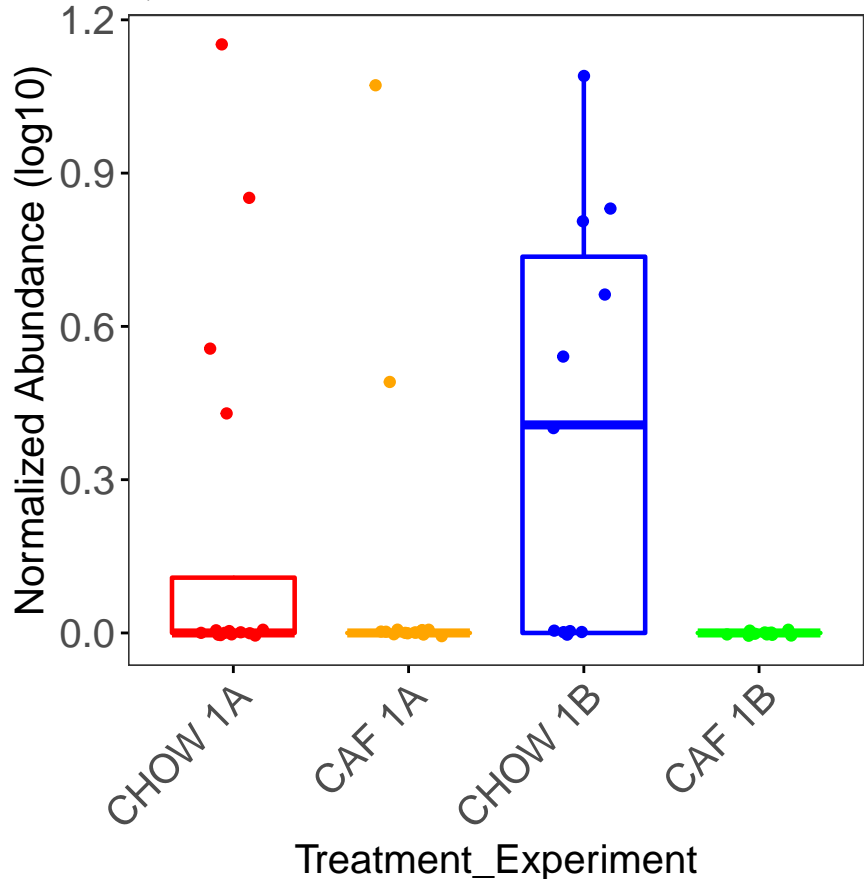

Treatment\_Experiment  
CHOW 1A  
CAF 1A  
CHOW 1B  
CAF 1B

Bacteroidetes.D.2\_\_Bacteroidia.D.3\_\_Bacteroidales.D.4\_\_Muribaculaceae\_\_\_\_  
Experiment 1A FDR = 0.97145  
Experiment 1B FDR = 0.00565

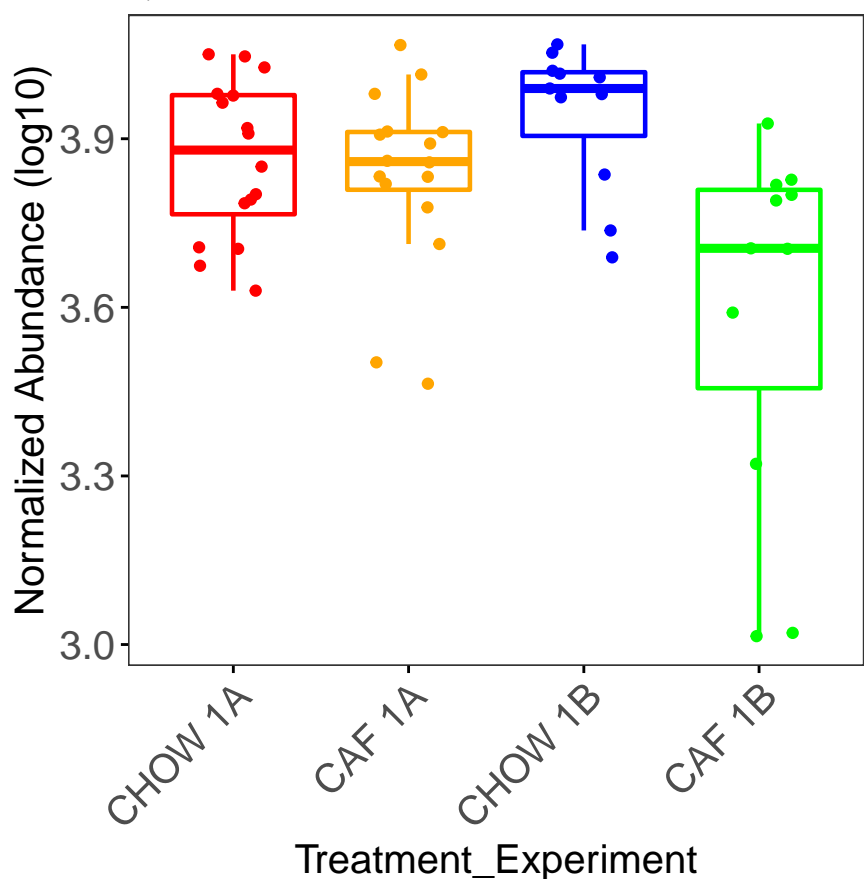

Treatment\_Experiment  
CHOW 1A  
CAF 1A  
CHOW 1B  
CAF 1B

Firmicutes.D.2\_\_Clostridia.D.3\_\_Clostridiales.D.4\_\_Ruminococcaceae\_\_\_\_  
Experiment 1A FDR = 0.68655  
Experiment 1B FDR = 0.00246

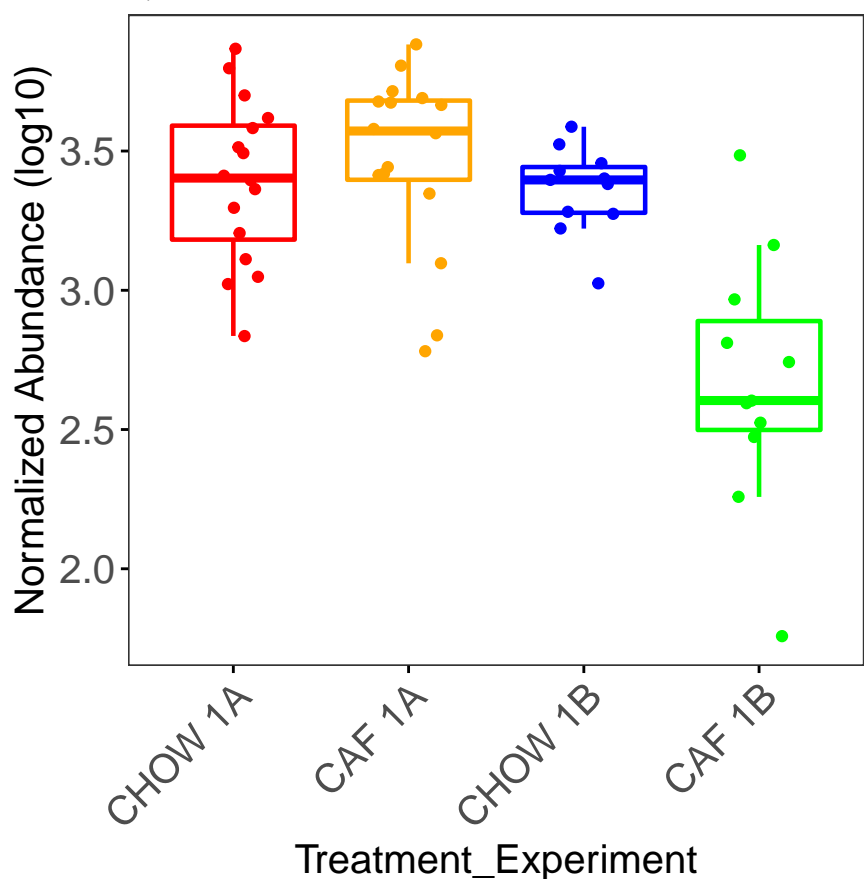

Treatment\_Experiment  
CHOW 1A  
CAF 1A  
CHOW 1B  
CAF 1B

Bacteroidetes.D.2\_\_Bacteroidia.D.3\_\_Bacteroidales\_\_\_\_  
Experiment 1A FDR = 0.56574  
Experiment 1B FDR = 0.03821

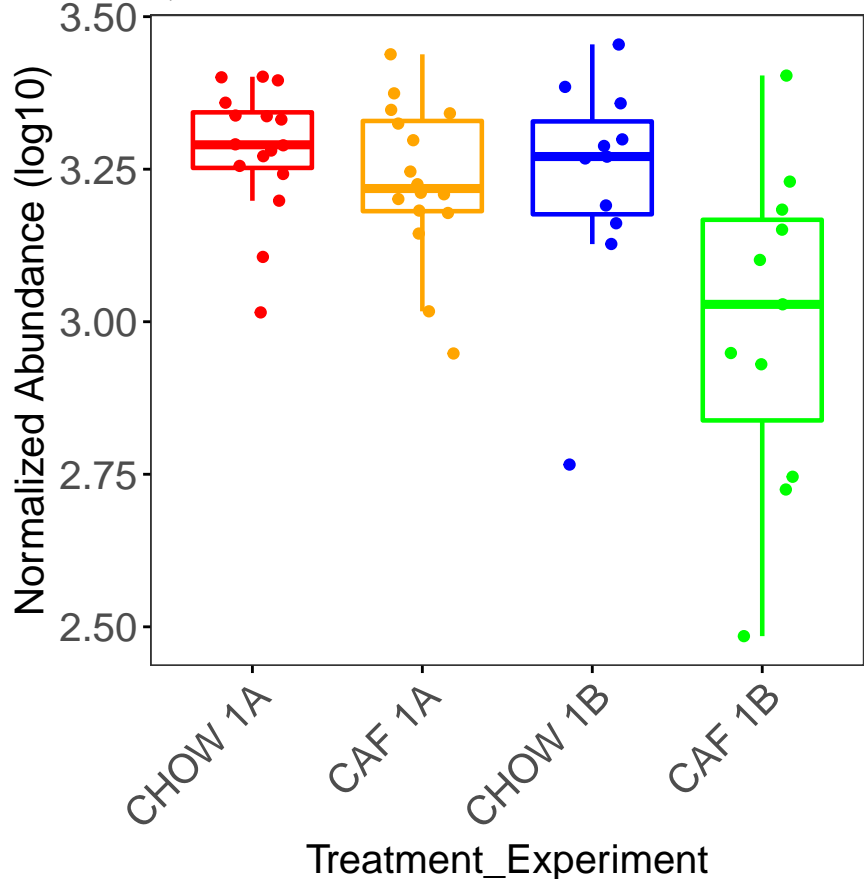

Treatment\_Experiment  
CHOW 1A  
CAF 1A  
CHOW 1B  
CAF 1B

Firmicutes.D.2\_\_Clostridia.D.3\_\_Clostridiales.D.4\_\_Ruminococcaceae.D.5\_\_Ruminococcus 1\_\_\_\_  
Experiment 1A FDR = 0.82894  
Experiment 1B FDR = 0.03328

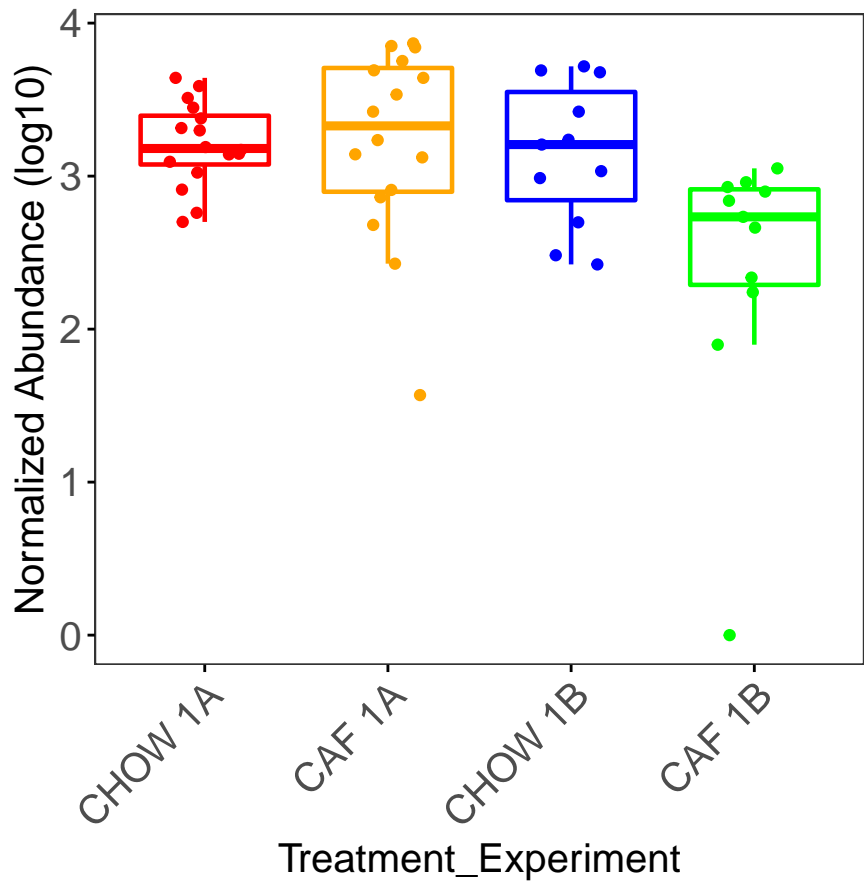

Treatment\_Experiment  
CHOW 1A  
CAF 1A  
CHOW 1B  
CAF 1B

Firmicutes.D.2\_\_Clostridia.D.3\_\_Clostridiales.D.4\_\_Ruminococcaceae.D.5\_\_Ruminococcaceae UCG-014\_\_\_\_  
Experiment 1A FDR = 0.26413  
Experiment 1B FDR = 0.01159

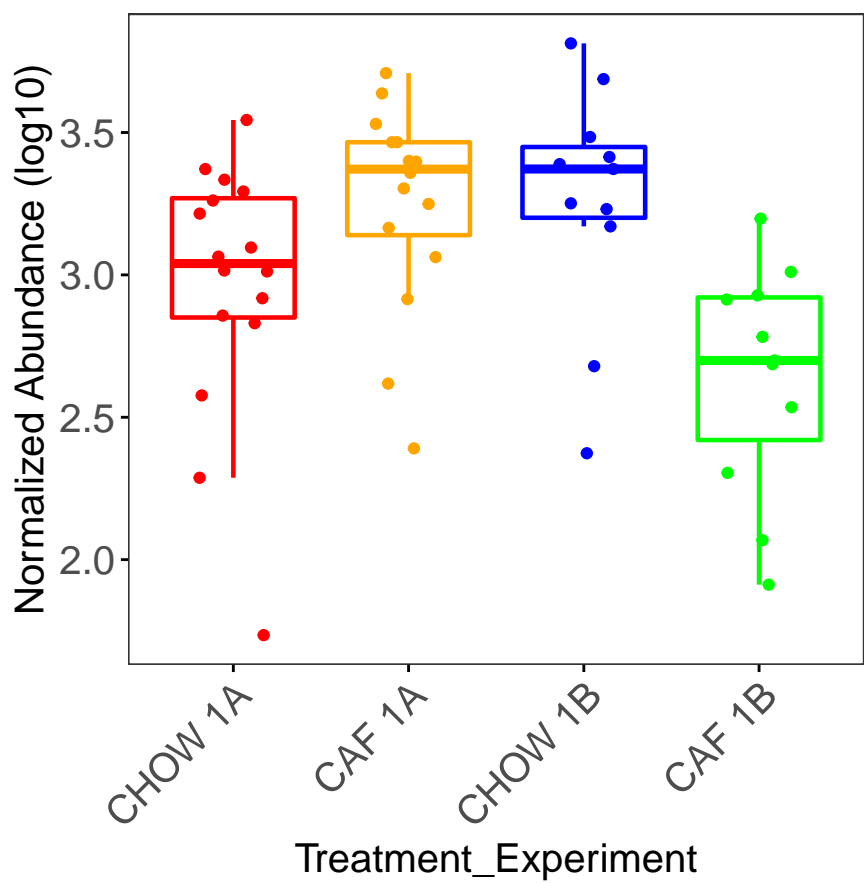

Treatment\_Experiment  
CHOW 1A  
CAF 1A  
CHOW 1B  
CAF 1B

Firmicutes.D.2\_\_Clostridia.D.3\_\_Clostridiales.D.4\_\_Lachnospiraceae\_\_\_\_  
Experiment 1A FDR = 0.3226  
Experiment 1B FDR = 0.01159

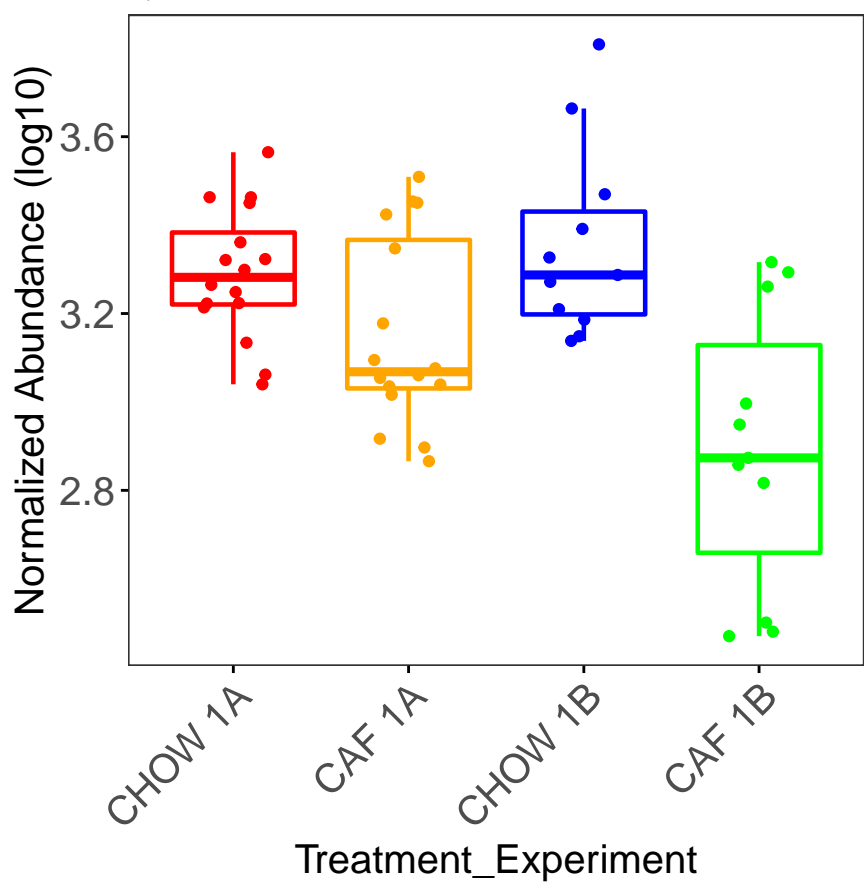

Treatment\_Experiment  
CHOW 1A  
CAF 1A  
CHOW 1B  
CAF 1B

Firmicutes.D.2\_\_Erysipelotrichia.D.3\_\_Erysipelotrichales.D.4\_\_Erysipelotrichaceae.D.5\_\_Allobaculum.D.6\_\_uncultured bacterium\_\_\_\_  
Experiment 1A FDR = 0.56574  
Experiment 1B FDR = 0.00101

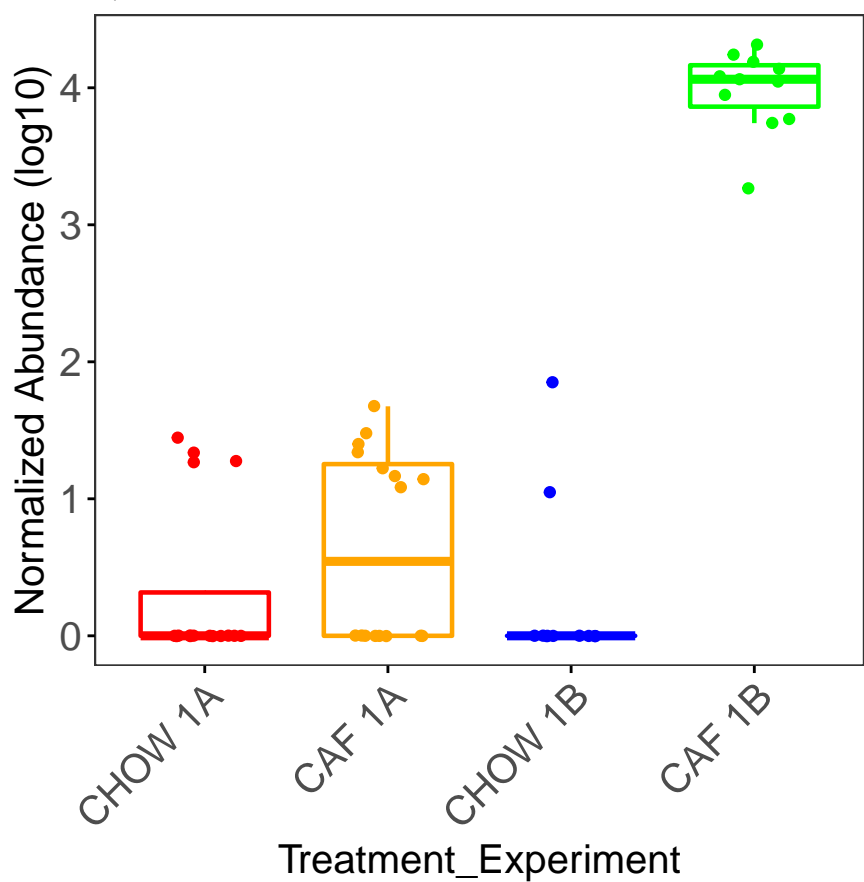

Treatment\_Experiment  
CHOW 1A  
CAF 1A  
CHOW 1B  
CAF 1B

Bacteroidetes.D.2\_\_Bacteroidia.D.3\_\_Bacteroidales.D.4\_\_Prevotellaceae.D.5\_\_Prevotellaceae NK3B31 group\_\_\_\_  
Experiment 1A FDR = 0.56574  
Experiment 1B FDR = 0.00101

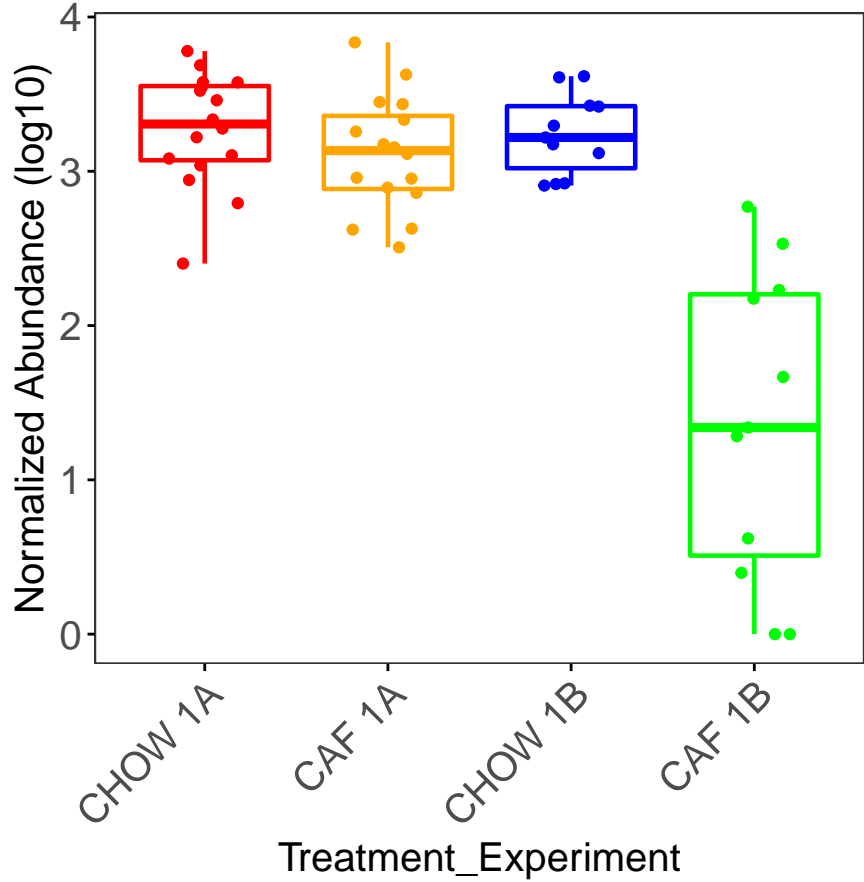

Treatment\_Experiment  
CHOW 1A  
CAF 1A  
CHOW 1B  
CAF 1B

Firmicutes.D.2\_\_Clostridia.D.3\_\_Clostridiales\_\_\_\_  
Experiment 1A FDR = 0.0142  
Experiment 1B FDR = 0.02814

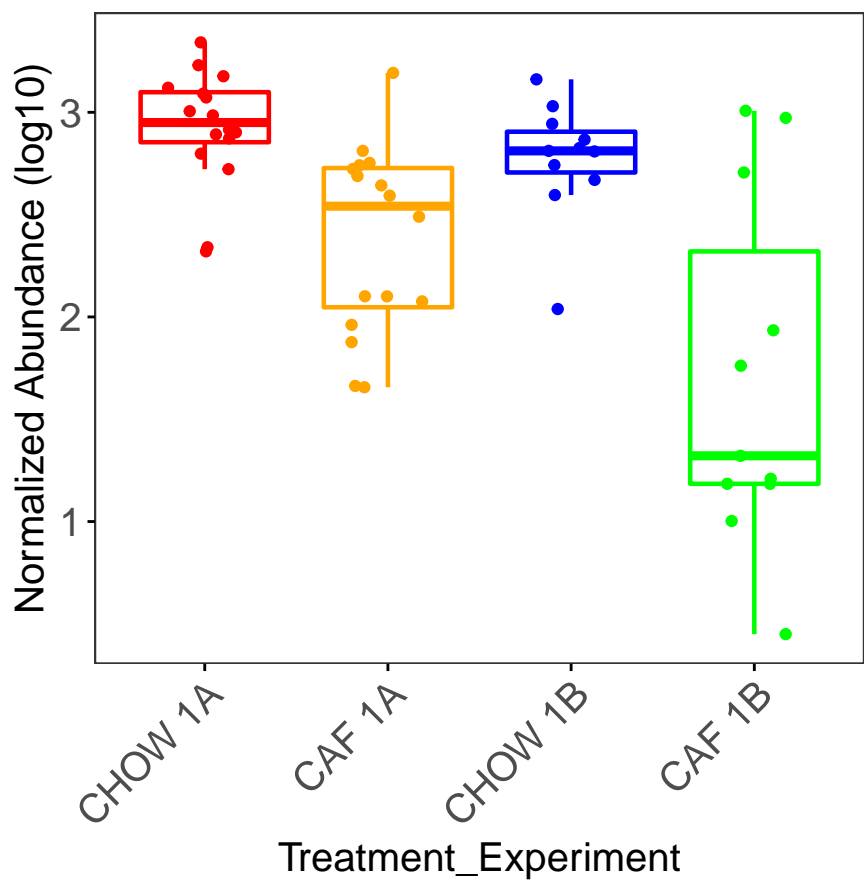

Treatment\_Experiment  
CHOW 1A  
CAF 1A  
CHOW 1B  
CAF 1B

Firmicutes.D.2\_\_Clostridia.D.3\_\_Clostridiales.D.4\_\_Ruminococcaceae.D.5\_\_Ruminiclostridium 5\_\_  
Experiment 1A FDR = 1  
Experiment 1B FDR = 0.00121

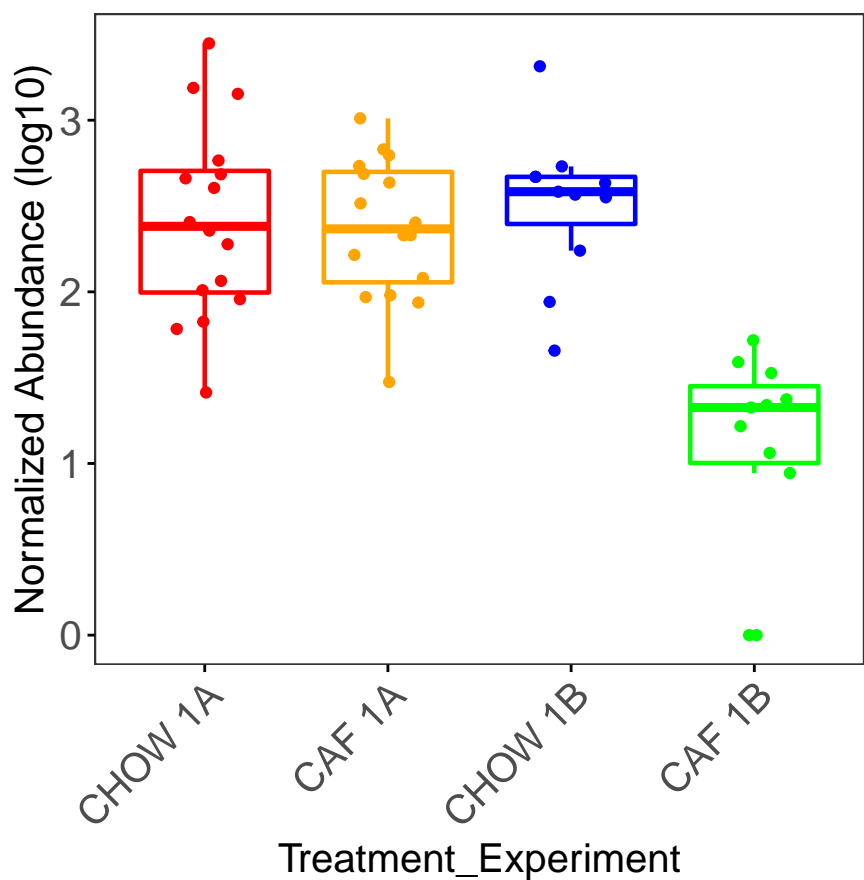

Bacteroidetes.D.2\_\_Bacteroidia.D.3\_\_Bacteroidales.D.4\_\_Prevotellaceae\_\_  
Experiment 1A FDR = 0.46744  
Experiment 1B FDR = 0.01159

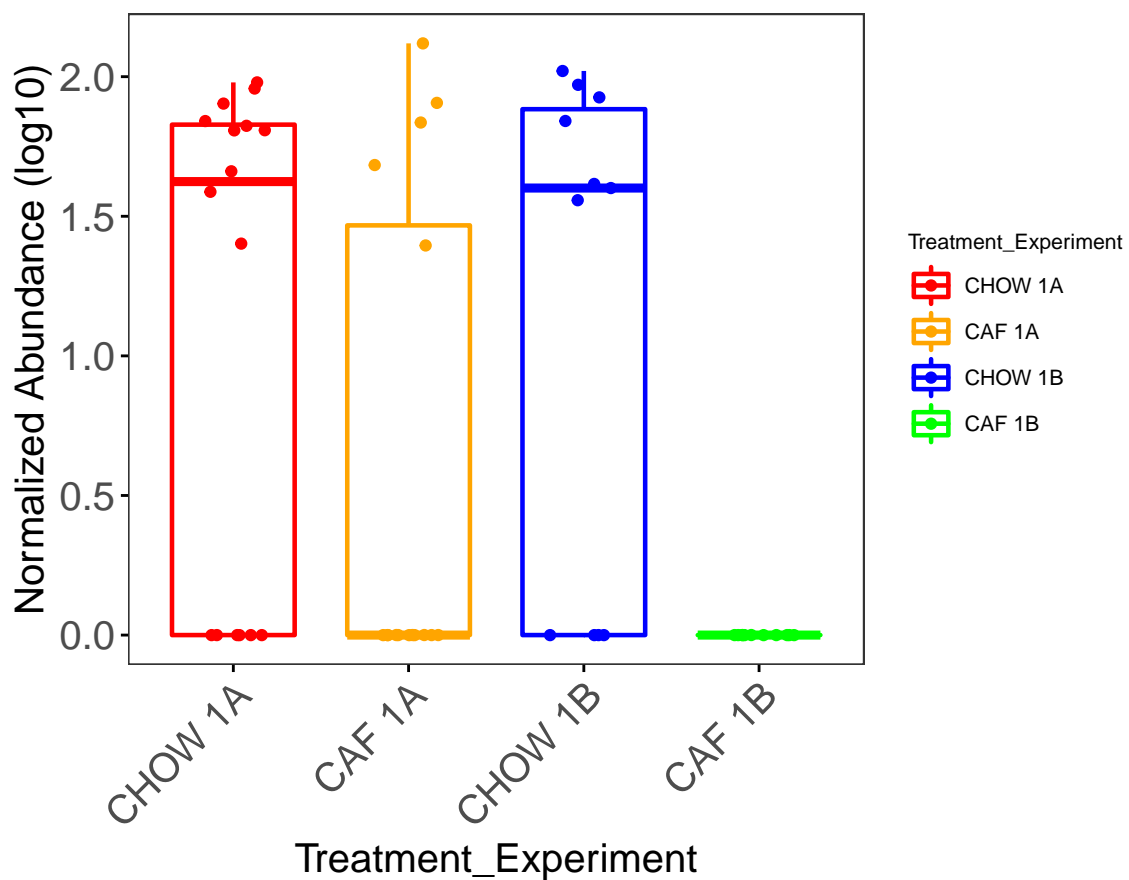

Firmicutes.D.2\_\_Clostridia.D.3\_\_Clostridiales.D.4\_\_Ruminococcaceae.D.5\_\_Ruminococcus 2\_\_  
Experiment 1A FDR = 0.96028  
Experiment 1B FDR = 0.01276

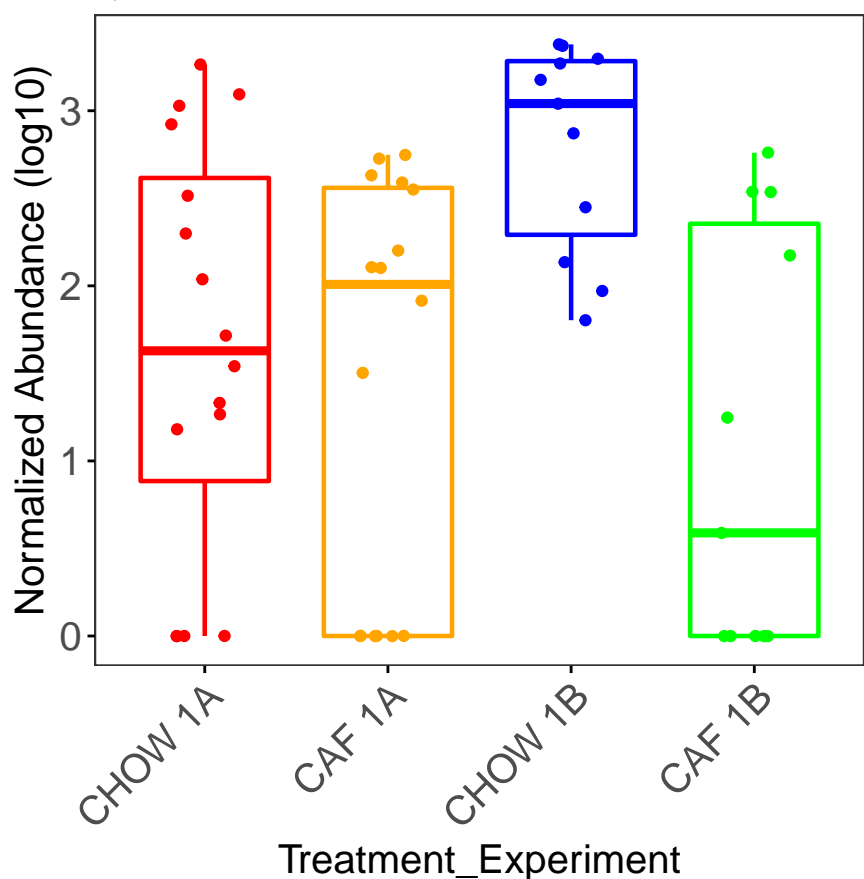

Firmicutes.D.2\_\_Clostridia.D.3\_\_Clostridiales.D.4\_\_Ruminococcaceae.D.5\_\_Ruminococcaceae UCG-013\_\_  
Experiment 1A FDR = 0.46744  
Experiment 1B FDR = 0.0017

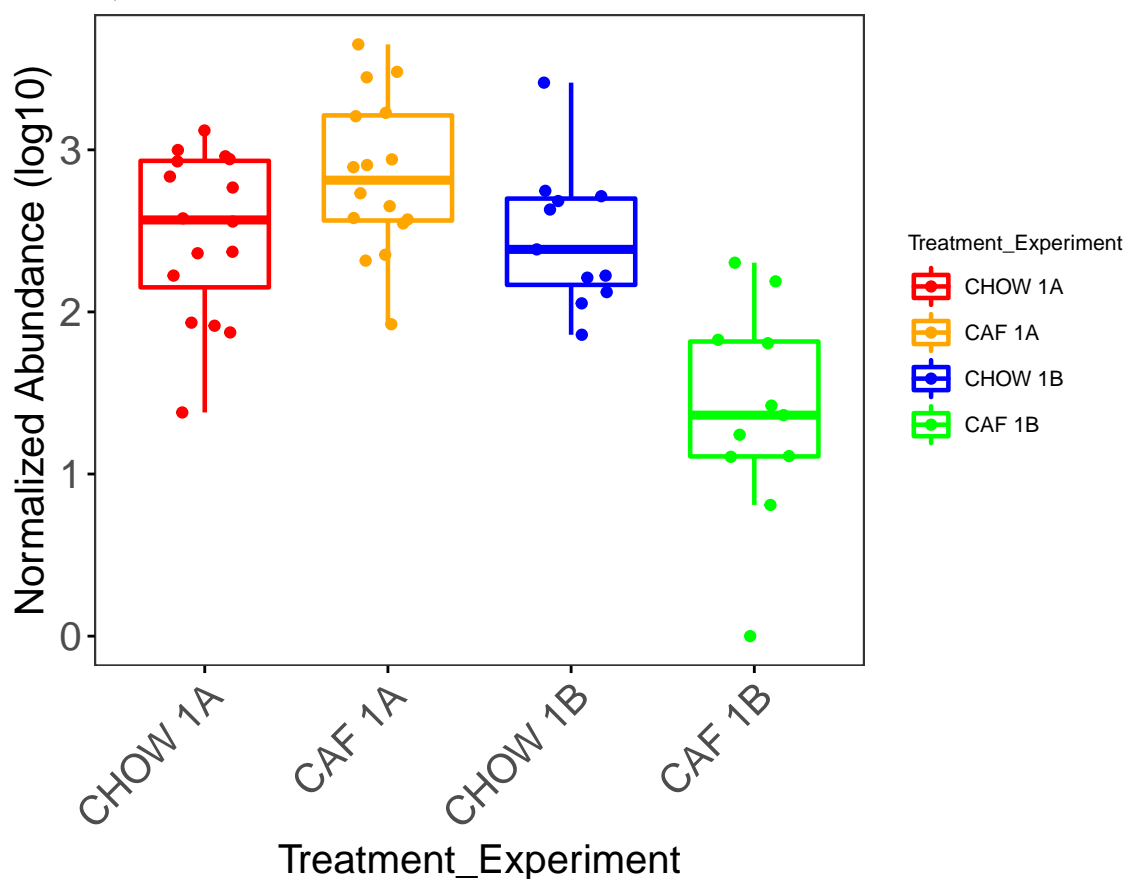

Proteobacteria.D.2\_\_Gammaproteobacteria.D.3\_\_Betaproteobacteriales.D.4\_\_Burkholderiaceae.D.5\_\_Parasutterella\_\_  
Experiment 1A FDR = 1  
Experiment 1B FDR = 0.00071

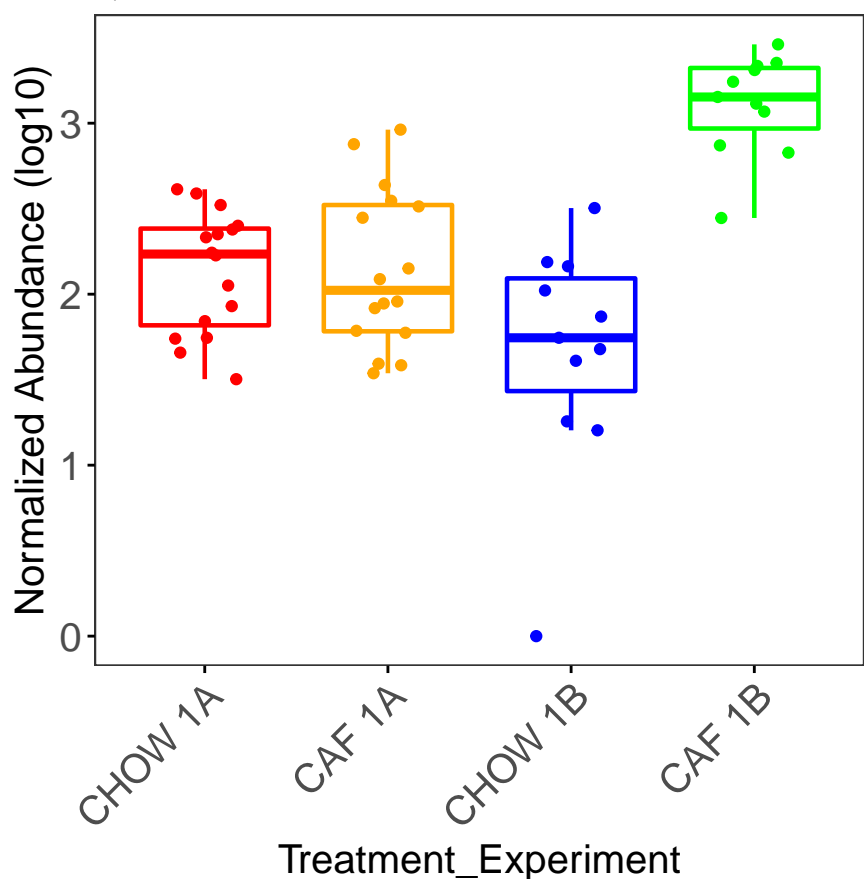

Firmicutes.D.2\_\_Erysipelotrichia.D.3\_\_Erysipelotrichales.D.4\_\_Erysipelotrichaceae.D.5\_\_Allobaculum.D.6\_\_uncultured Allobaculum sp\_\_  
Experiment 1A FDR = 0.90178  
Experiment 1B FDR = 0.00758

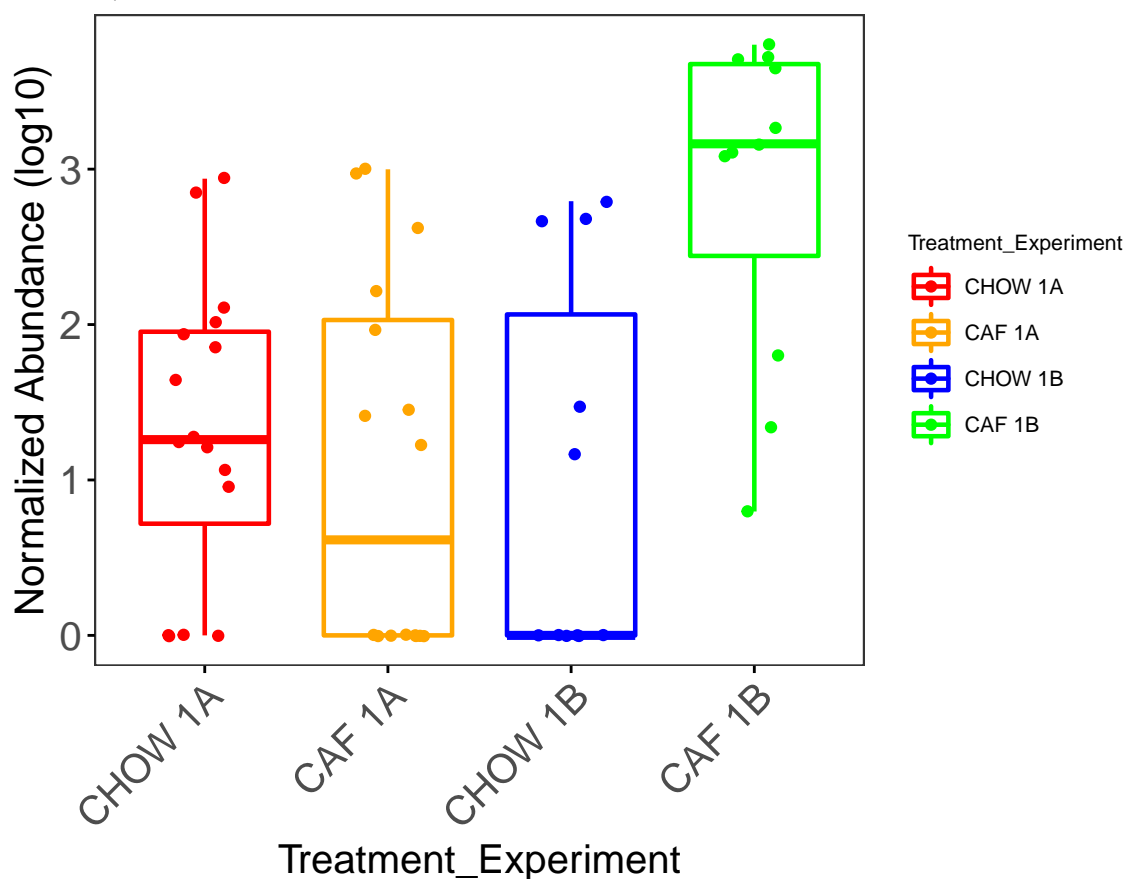

Firmicutes.D.2\_\_Clostridia.D.3\_\_Clostridiales.D.4\_\_Ruminococcaceae.D.5\_\_Ruminiclostridium 6...  
Experiment 1A FDR = 0.3226  
Experiment 1B FDR = 0.00125

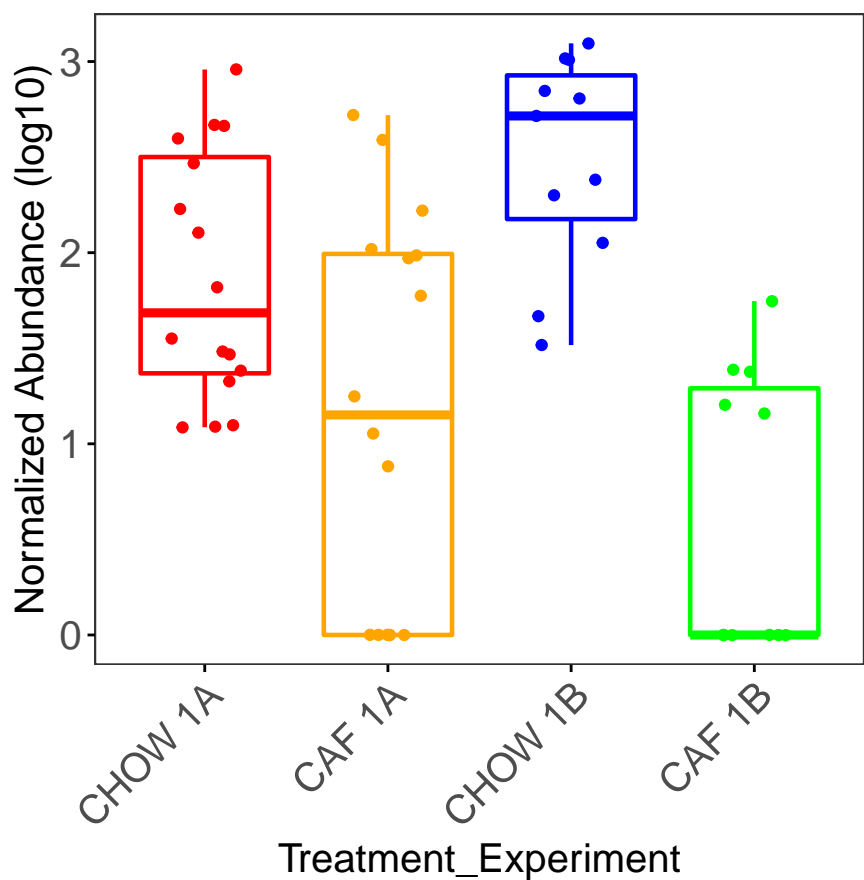

Tenericutes.D.2\_\_Mollicutes.D.3\_\_Mollicutes RF39...  
Experiment 1A FDR = 0.92415  
Experiment 1B FDR = 0.04906

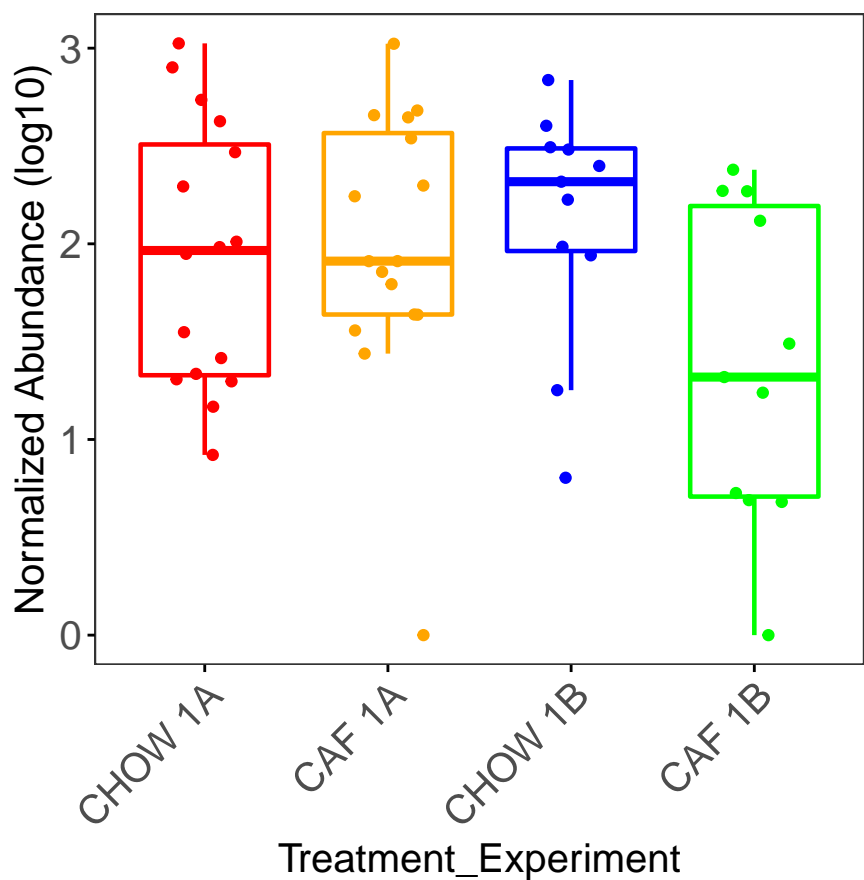

Firmicutes.D.2\_\_Clostridia.D.3\_\_Clostridiales.D.4\_\_Ruminococcaceae.D.5\_\_[Eubacterium] coprostanoligenes group.D.6\_\_gut metagenome  
Experiment 1A FDR = 0.3226  
Experiment 1B FDR = 0.047

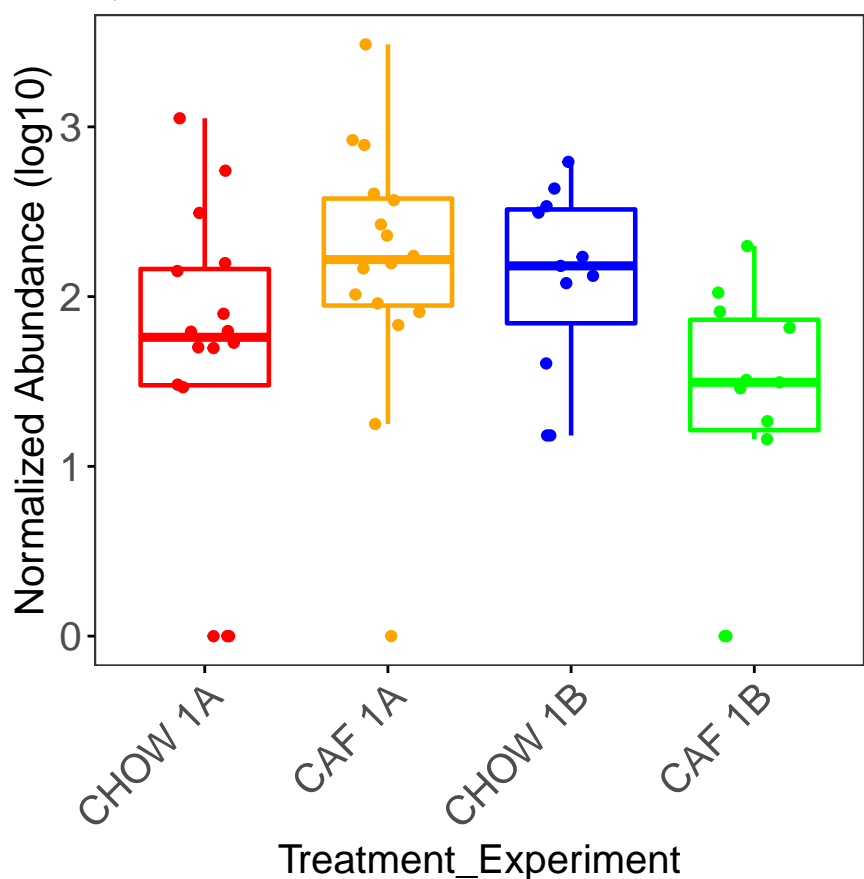

Bacteroidetes.D.2\_\_Bacteroidia.D.3\_\_Bacteroidales.D.4\_\_Tannerellaceae.D.5\_\_Parabacteroides...  
Experiment 1A FDR = 0.05198  
Experiment 1B FDR = 0.95638

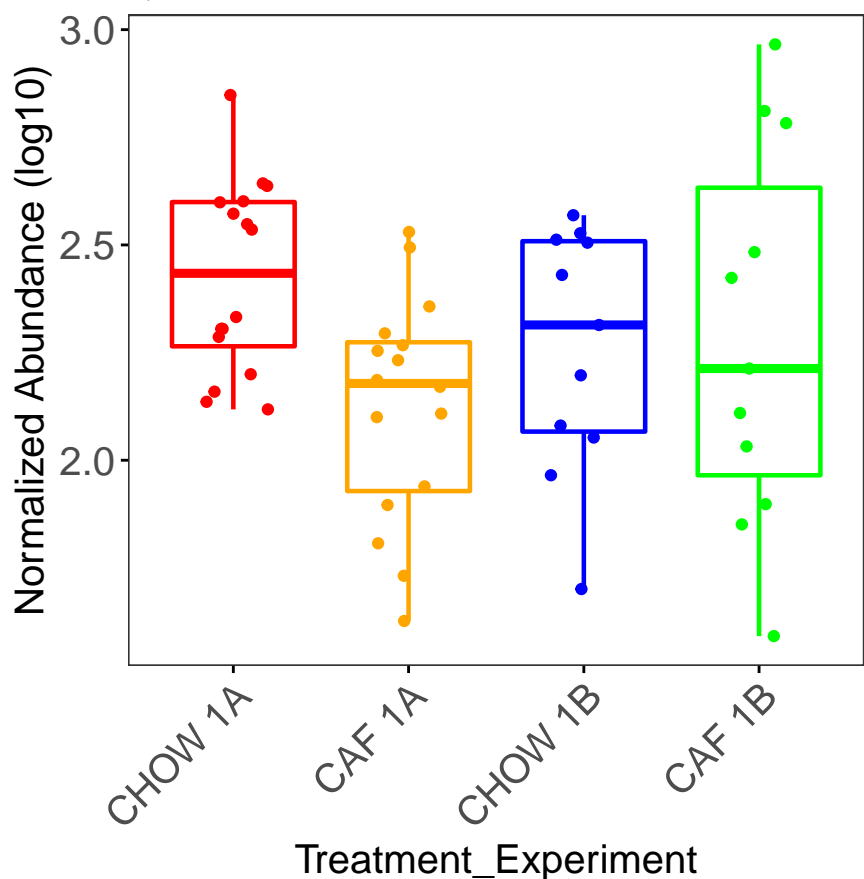

Firmicutes.D.2\_\_Clostridia.D.3\_\_Clostridiales.D.4\_\_Peptostreptococcaceae.D.5\_\_Romboutsia...  
Experiment 1A FDR = 1  
Experiment 1B FDR = 0.00213

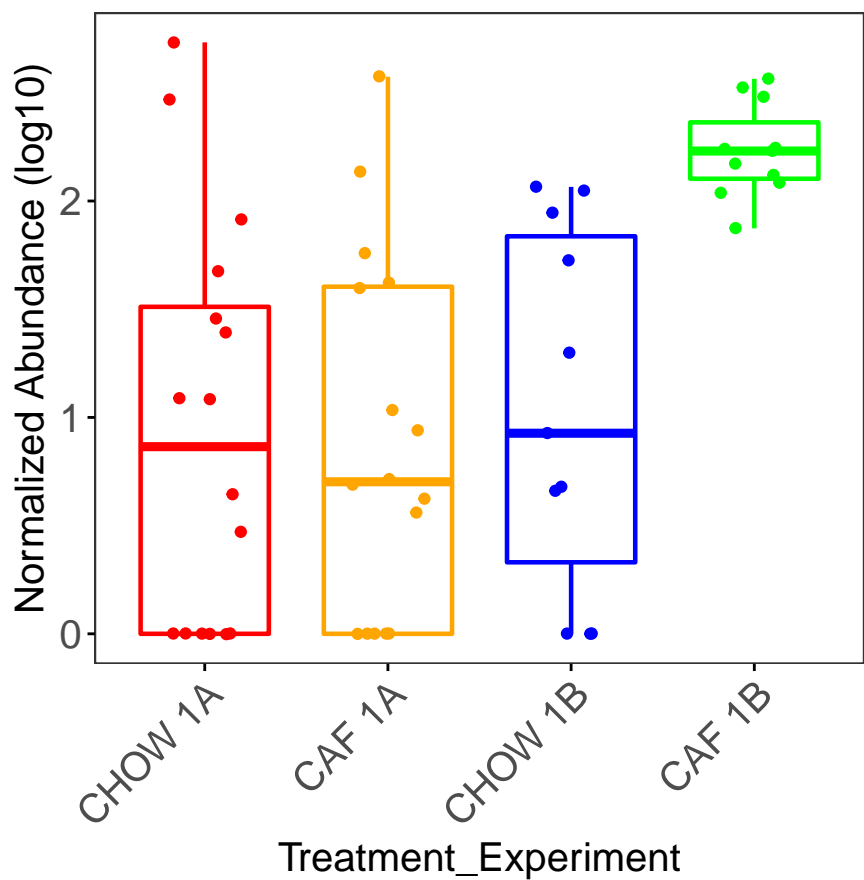

Actinobacteria.D.2\_\_Actinobacteria.D.3\_\_Bifidobacteriales.D.4\_\_Bifidobacteriaceae.D.5\_\_Bifidobacterium...  
Experiment 1A FDR = 0.66879  
Experiment 1B FDR = 0.00101

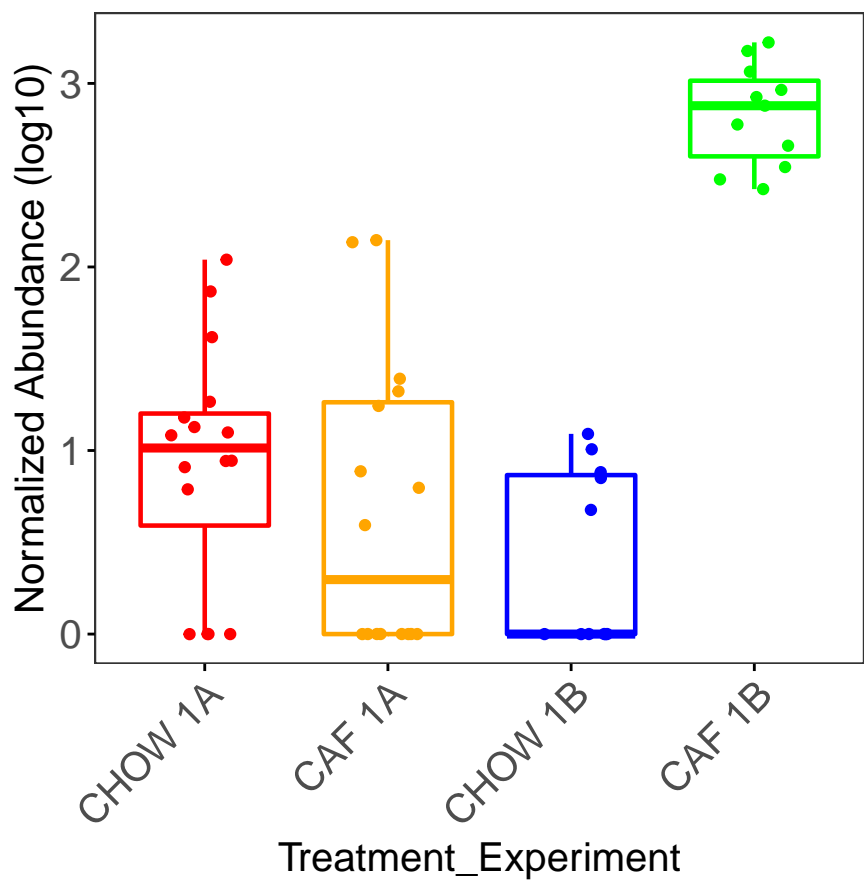

Firmicutes.D.2\_\_Clostridia.D.3\_\_Clostridiales.D.4\_\_Ruminococcaceae.D.5\_\_Ruminococcaceae UCG-014.D.6\_\_unidentified rumen bacterium JW  
Experiment 1A FDR = 0.36073  
Experiment 1B FDR = 0.01159

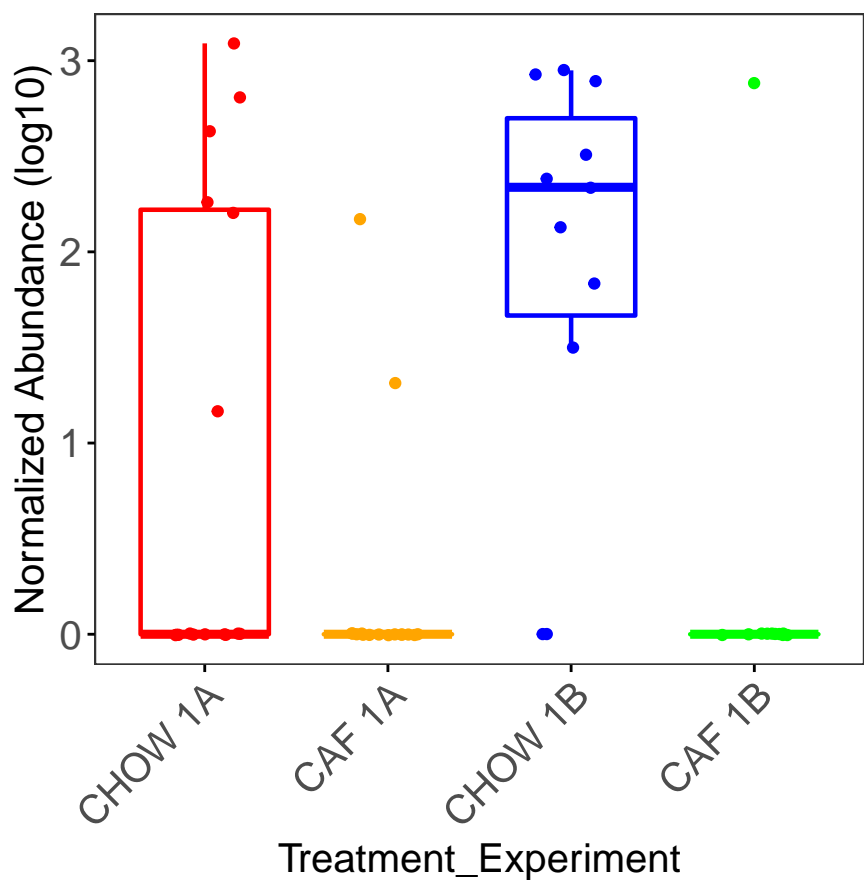

Treatment\_Experiment  
CHOW 1A  
CAF 1A  
CHOW 1B  
CAF 1B

Bacteroidetes.D.2\_\_Bacteroidia.D.3\_\_Bacteroidales.D.4\_\_Prevotellaceae.D.5\_\_Prevotellaceae UCG-001...  
Experiment 1A FDR = 1  
Experiment 1B FDR = 0.00546

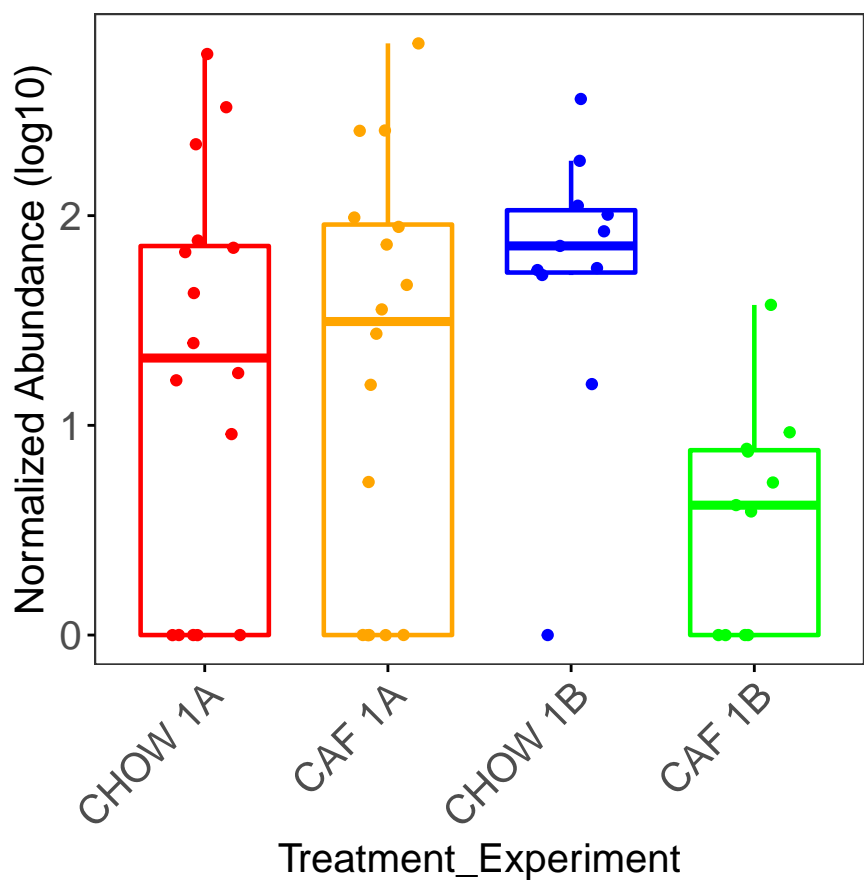

Treatment\_Experiment  
CHOW 1A  
CAF 1A  
CHOW 1B  
CAF 1B

Proteobacteria.D.2\_\_Deltaproteobacteria.D.3\_\_Desulfovibrionales.D.4\_\_Desulfovibrionaceae.D.5\_\_Desulfovibrio...  
Experiment 1A FDR = 1  
Experiment 1B FDR = 0.03821

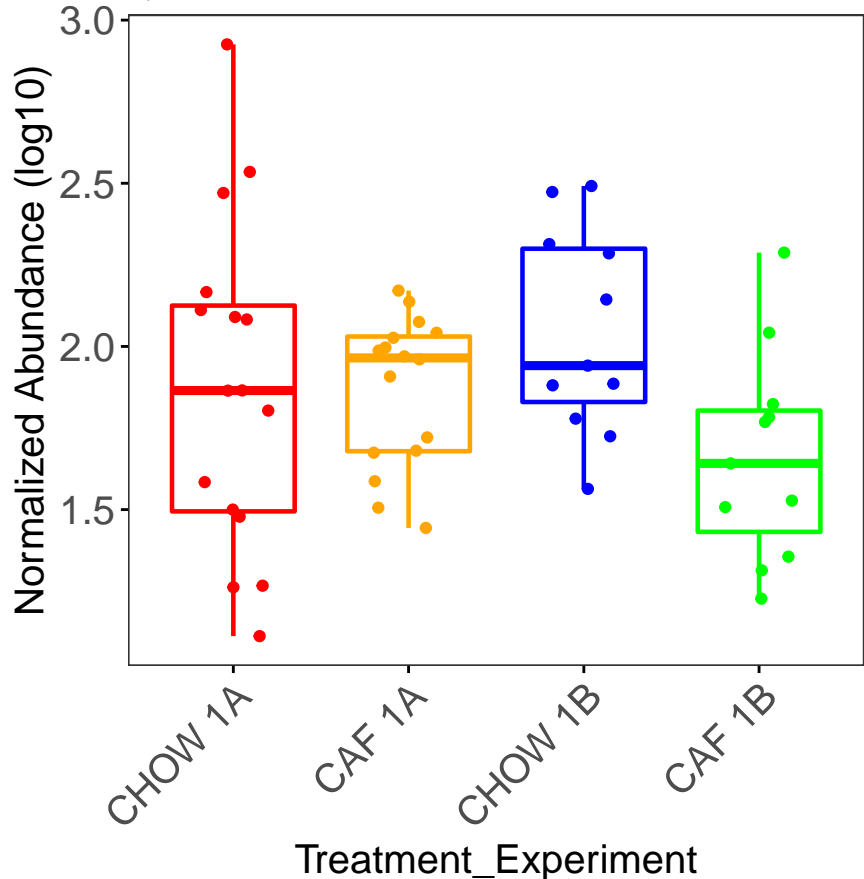

Treatment\_Experiment  
CHOW 1A  
CAF 1A  
CHOW 1B  
CAF 1B

Firmicutes.D.2\_\_Erysipelotrichia.D.3\_\_Erysipelotrichales.D.4\_\_Erysipelotrichaceae.D.5\_\_Faecalibaculum.D.6\_\_uncultured bacterium  
Experiment 1A FDR = 0.46744  
Experiment 1B FDR = 0.00101

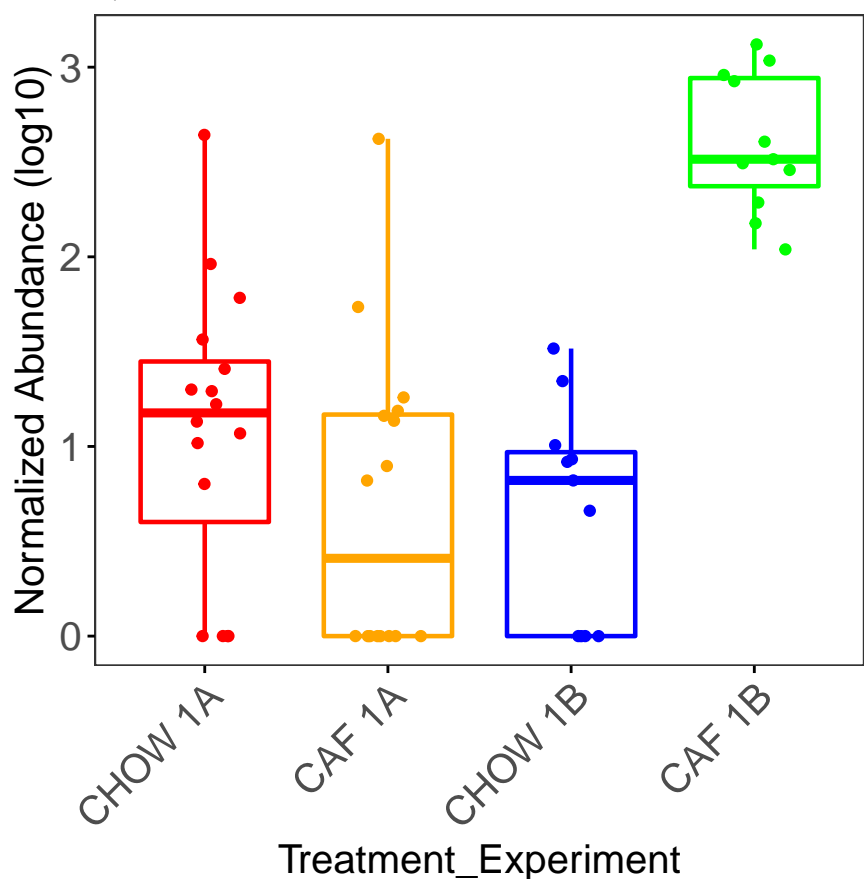

Treatment\_Experiment  
CHOW 1A  
CAF 1A  
CHOW 1B  
CAF 1B

Firmicutes...  
Experiment 1A FDR = 0.08288  
Experiment 1B FDR = 0.7171

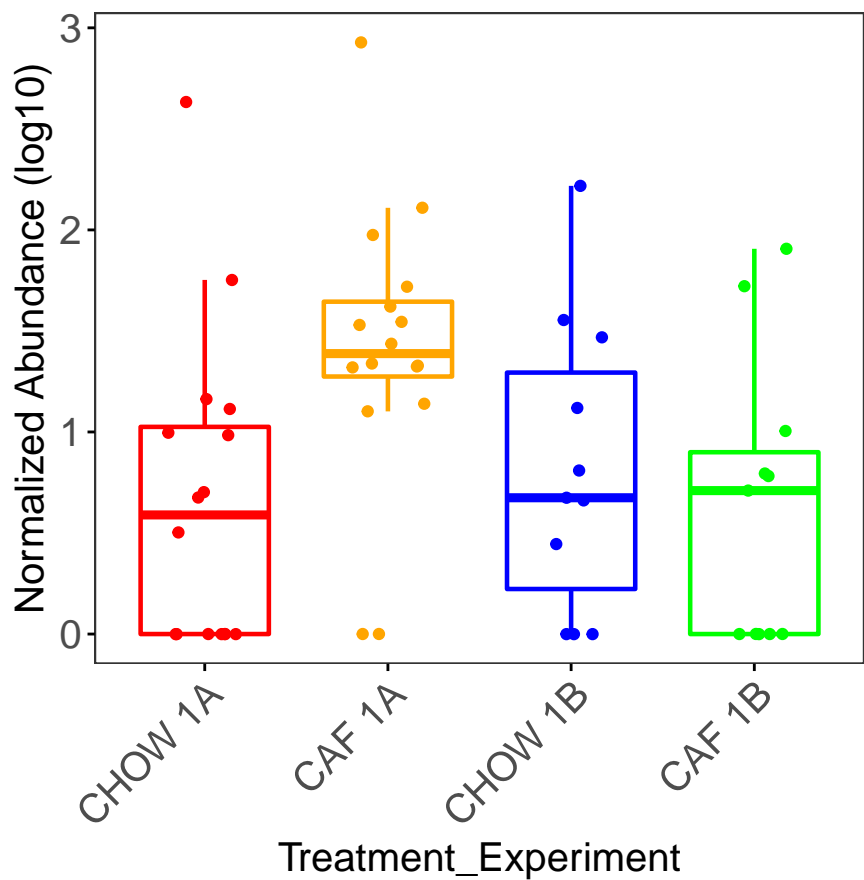

Treatment\_Experiment  
CHOW 1A  
CAF 1A  
CHOW 1B  
CAF 1B

Firmicutes.D.2\_\_Clostridia.D.3\_\_Clostridiales.D.4\_\_Lachnospiraceae.D.5\_\_Roseburia...  
Experiment 1A FDR = 0.72981  
Experiment 1B FDR = 0.04107

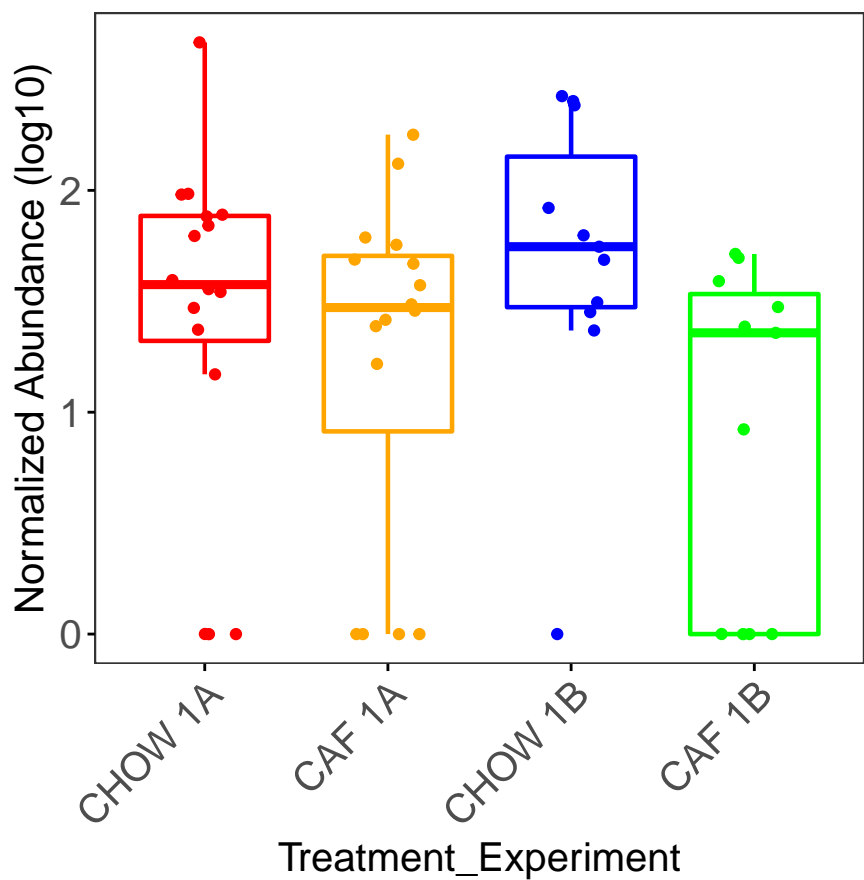

Treatment\_Experiment  
CHOW 1A  
CAF 1A  
CHOW 1B  
CAF 1B

Actinobacteria.D.2\_\_Coriobacterii.D.3\_\_Coriobacteriales.D.4\_\_Atopobiaceae.D.5\_\_Coriobacteriaceae UCG-002.D.6\_\_uncultured bacterium  
Experiment 1A FDR = 1  
Experiment 1B FDR = 0.00101

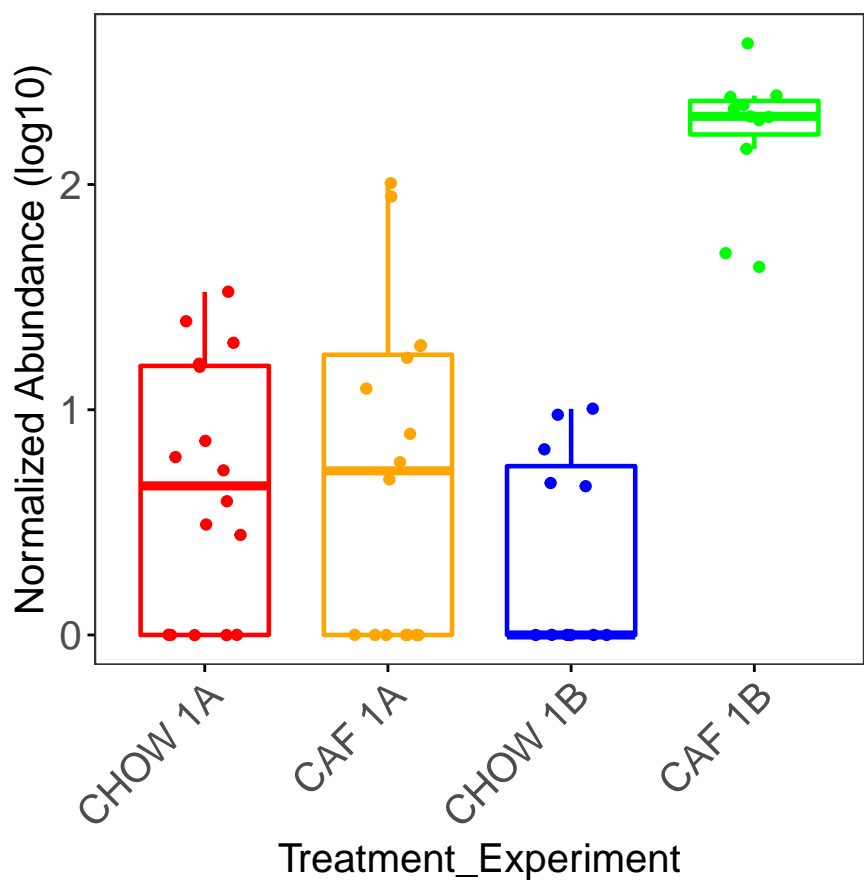

Treatment\_Experiment  
CHOW 1A  
CAF 1A  
CHOW 1B  
CAF 1B

Proteobacteria.D.2\_\_Gammaproteobacteria.D.3\_\_Betaproteobacteriales.\_\_\_\_\_  
Experiment 1A FDR = 0.00026  
Experiment 1B FDR = 0.00101

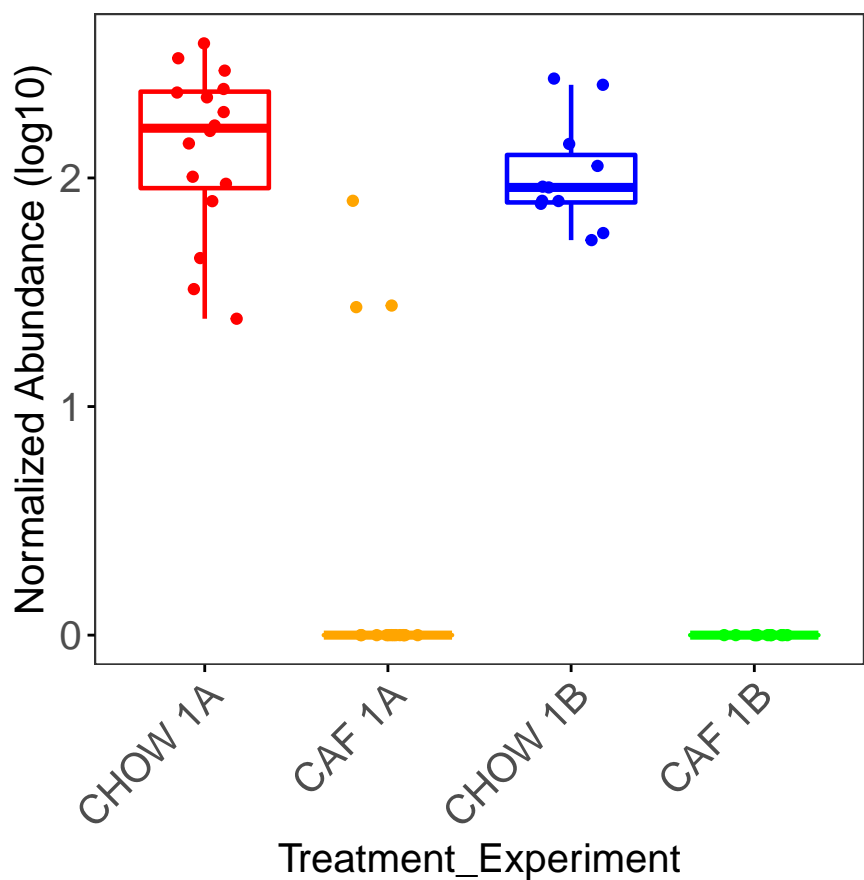

Treatment\_Experiment  
CHOW 1A  
CAF 1A  
CHOW 1B  
CAF 1B

Firmicutes.D.2\_\_Clostridia.D.3\_\_Clostridiales.D.4\_\_Clostridiaceae.1.D.5\_\_Clostridium sensu stricto 1\_\_\_\_  
Experiment 1A FDR = 0.53496  
Experiment 1B FDR = 0.00101

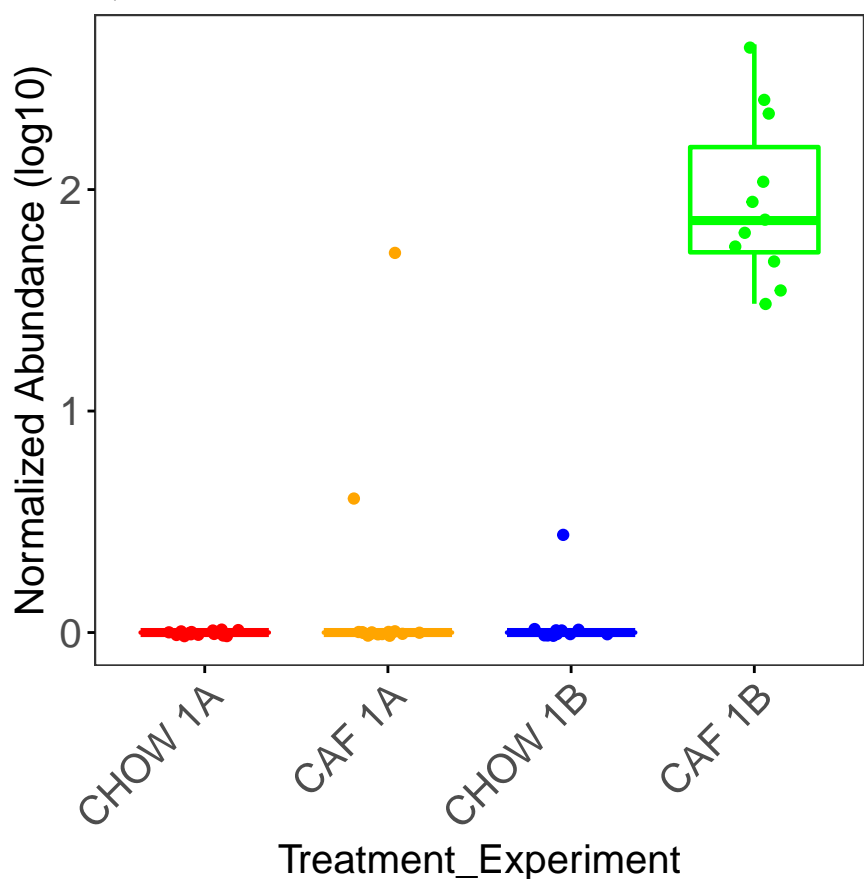

Treatment\_Experiment  
CHOW 1A  
CAF 1A  
CHOW 1B  
CAF 1B

Bacteroidetes.D.2\_\_Bacteroidia.D.3\_\_Bacteroidales.D.4\_\_Prevotellaceae.D.5\_\_Paraprevotella\_\_\_\_  
Experiment 1A FDR = 0.3226  
Experiment 1B FDR = 0.00101

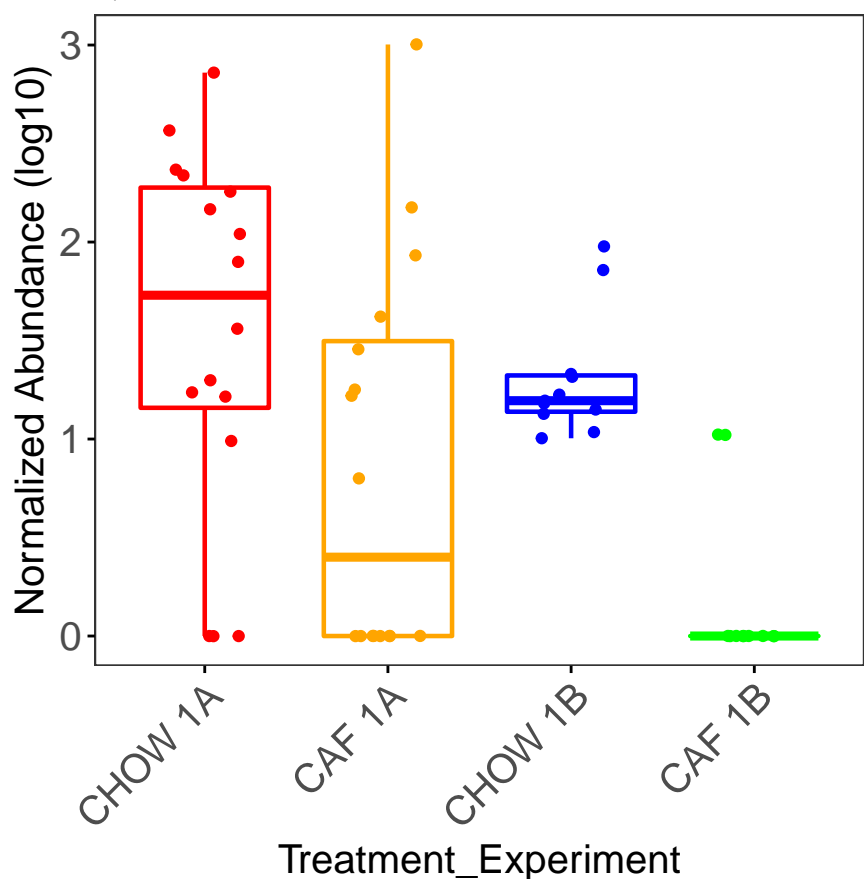

Treatment\_Experiment  
CHOW 1A  
CAF 1A  
CHOW 1B  
CAF 1B

Actinobacteria.D.2\_\_Coriobacterii.D.3\_\_Coriobacteriales.D.4\_\_uncultured.D.5\_\_uncultured bacterium.D.6\_\_uncultured bacterium\_\_\_\_  
Experiment 1A FDR = 0.89678  
Experiment 1B FDR = 0.00101

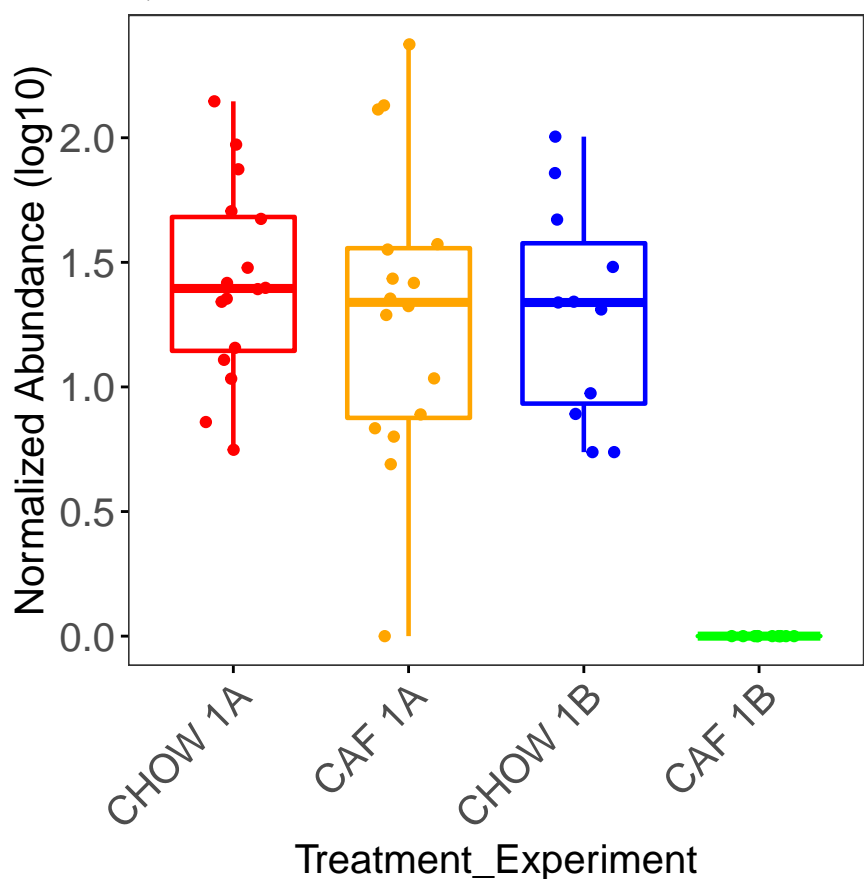

Treatment\_Experiment  
CHOW 1A  
CAF 1A  
CHOW 1B  
CAF 1B

Firmicutes.D.2\_\_Clostridia.D.3\_\_Clostridiales.D.4\_\_Ruminococcaceae.D.5\_\_Ruminococcaceae UCG-005.D.6\_\_uncultured bacterium adhufec10\_\_\_\_  
Experiment 1A FDR = 0.06069  
Experiment 1B FDR = 0.35305

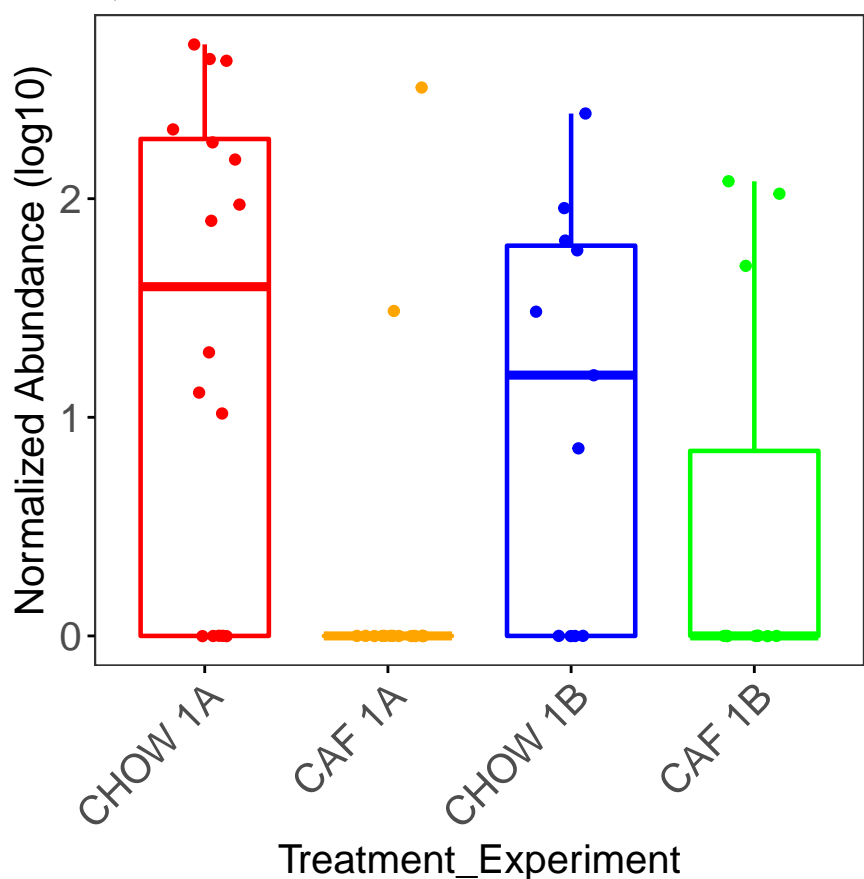

Treatment\_Experiment  
CHOW 1A  
CAF 1A  
CHOW 1B  
CAF 1B

Firmicutes.D.2\_\_Clostridia.D.3\_\_Clostridiales.D.4\_\_Ruminococcaceae.D.5\_\_Ruminiclostridium 9...  
Experiment 1A FDR = 0.72245  
Experiment 1B FDR = 0.06625

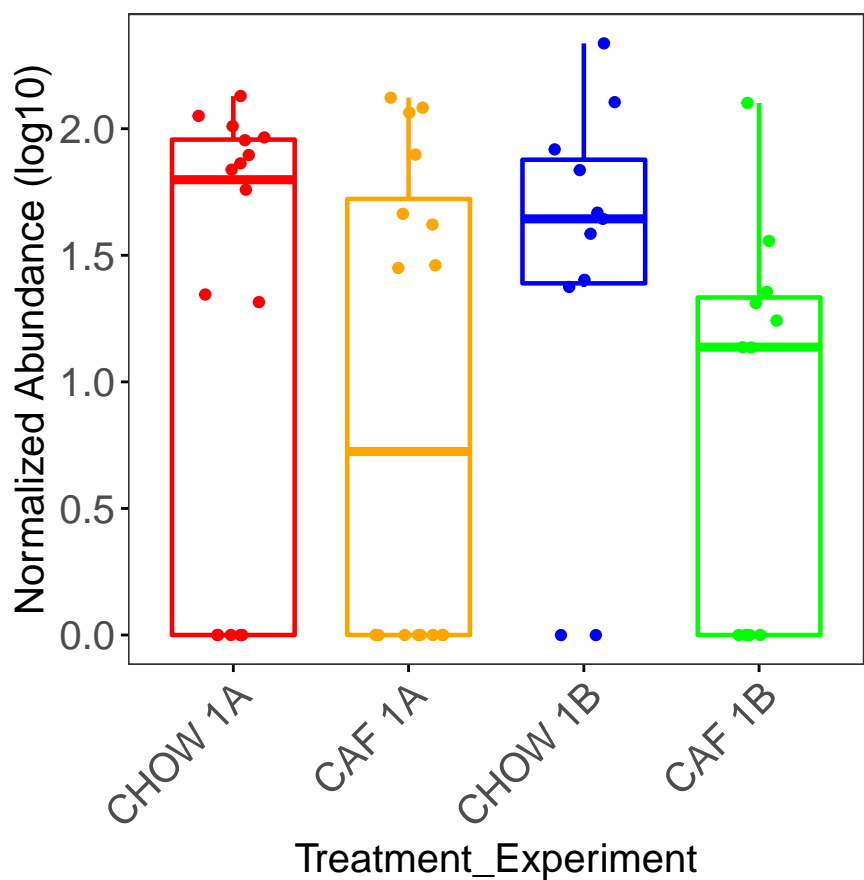

Actinobacteria.D.2\_\_Coriobacteria.D.3\_\_Coriobacteriales.D.4\_\_Eggerthellaceae...  
Experiment 1A FDR = 1  
Experiment 1B FDR = 0.00246

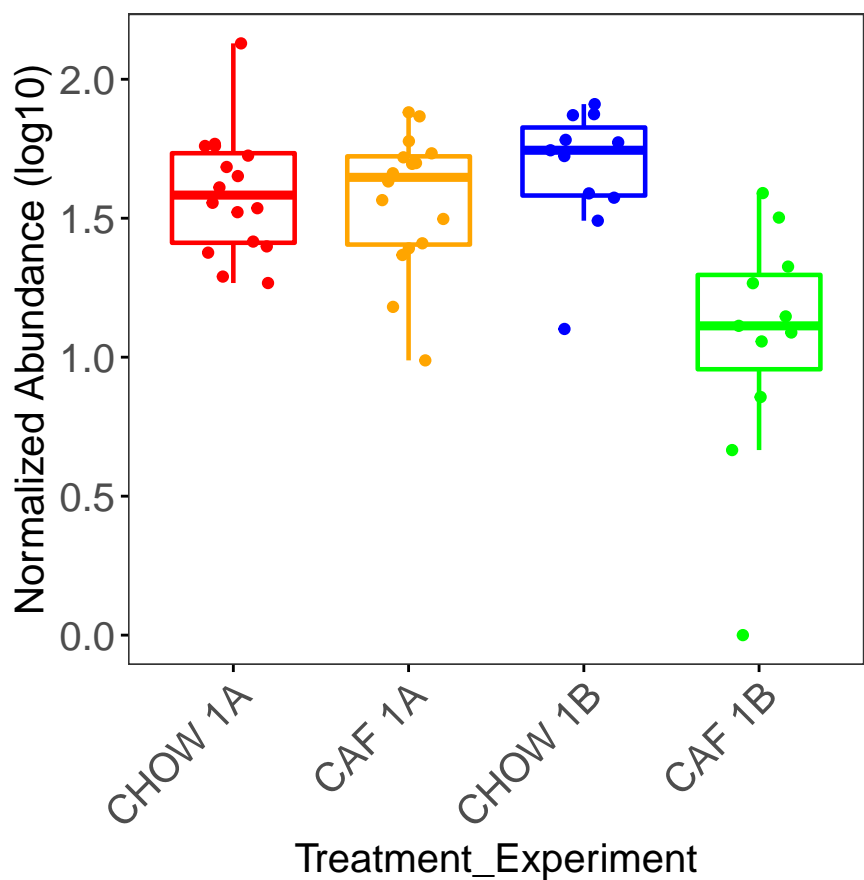

Firmicutes.D.2\_\_Clostridia.D.3\_\_Clostridiales.D.4\_\_Christensenellaceae.D.5\_\_Christensenellaceae R-7 group...  
Experiment 1A FDR = 0.3226  
Experiment 1B FDR = 0.01527

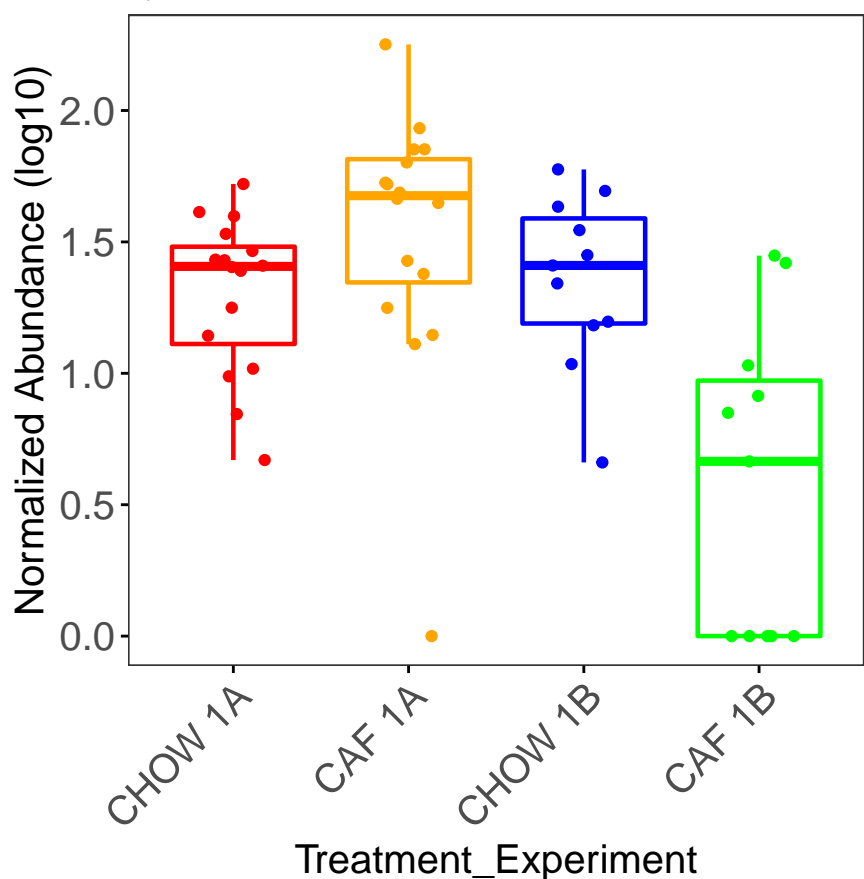

Firmicutes.D.2\_\_Bacilli.D.3\_\_Lactobacillales.D.4\_\_Streptococcaceae.D.5\_\_Streptococcus...  
Experiment 1A FDR = 0.43461  
Experiment 1B FDR = 0.06201

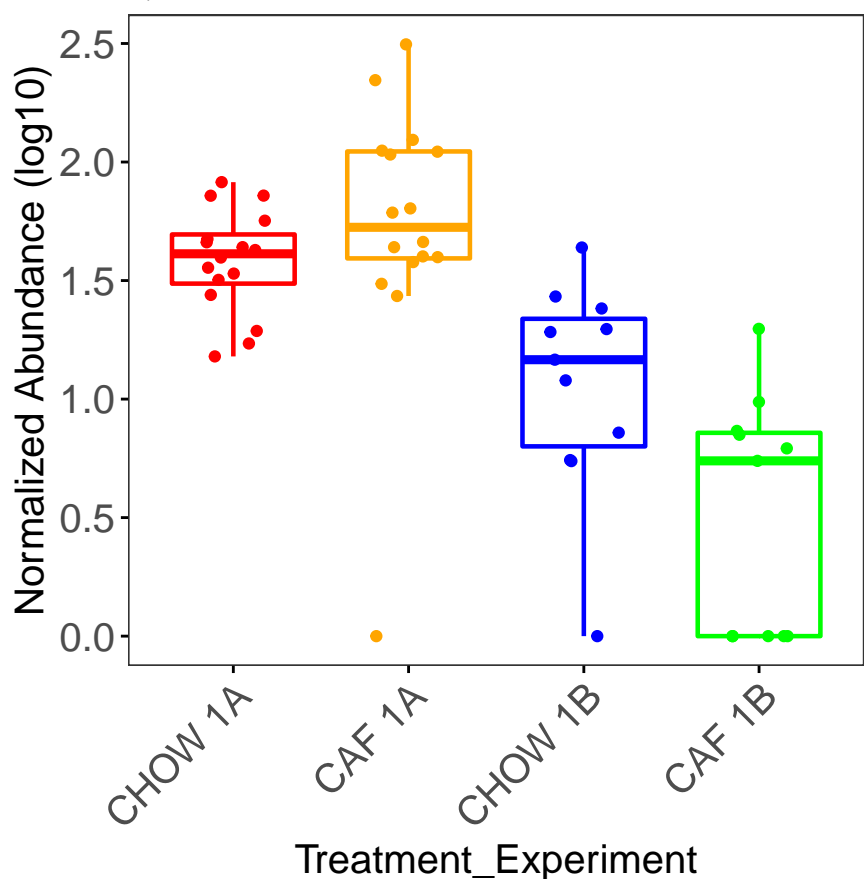

Firmicutes.D.2\_\_Bacilli.D.3\_\_Lactobacillales.D.4\_\_Streptococcaceae.D.5\_\_Lactococcus...  
Experiment 1A FDR = 1  
Experiment 1B FDR = 0.00213

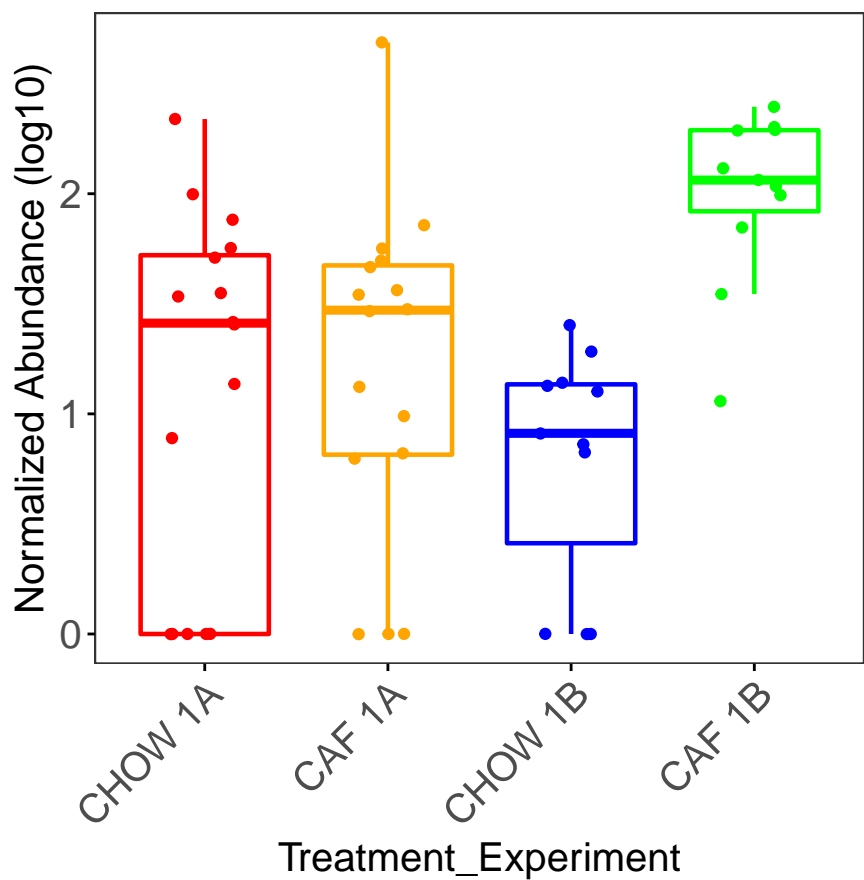

Bacteroidetes.D.2\_\_Bacteroidia.D.3\_\_Bacteroidales.D.4\_\_Prevotellaceae.D.5\_\_Paraprevotella.D.6\_\_uncultured organism...  
Experiment 1A FDR = 0.3373  
Experiment 1B FDR = 0.02634

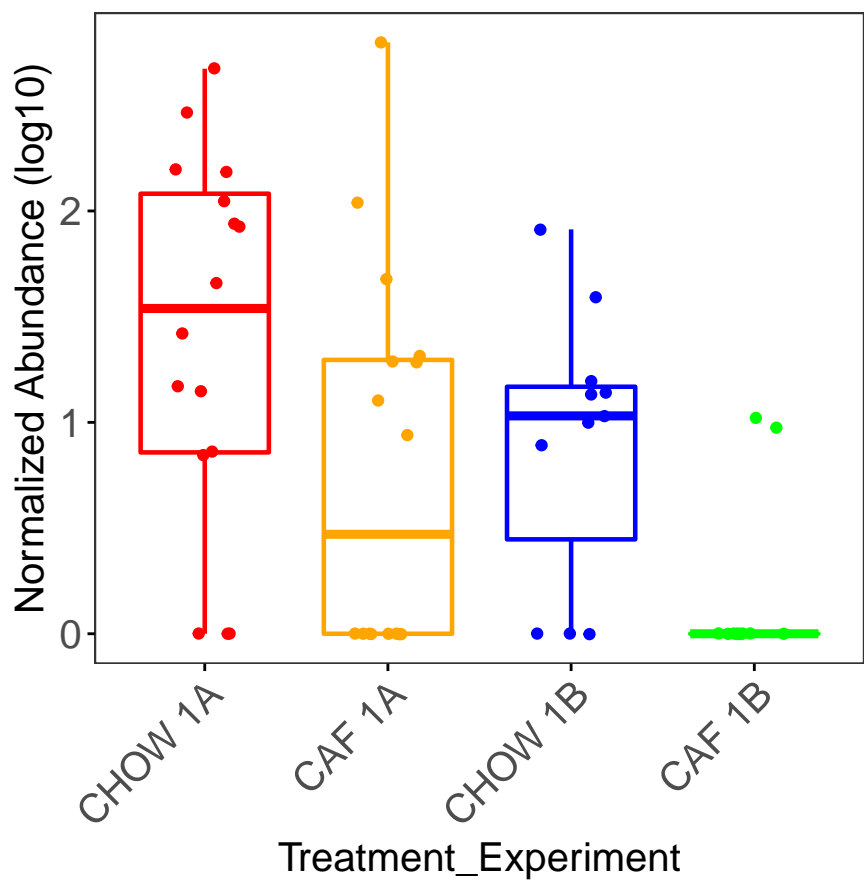

Proteobacteria.D.2\_\_Deltaproteobacteria.D.3\_\_Desulfovibrionales.D.4\_\_Desulfovibrionaceae.....  
Experiment 1A FDR = 0.3226  
Experiment 1B FDR = 0.09152

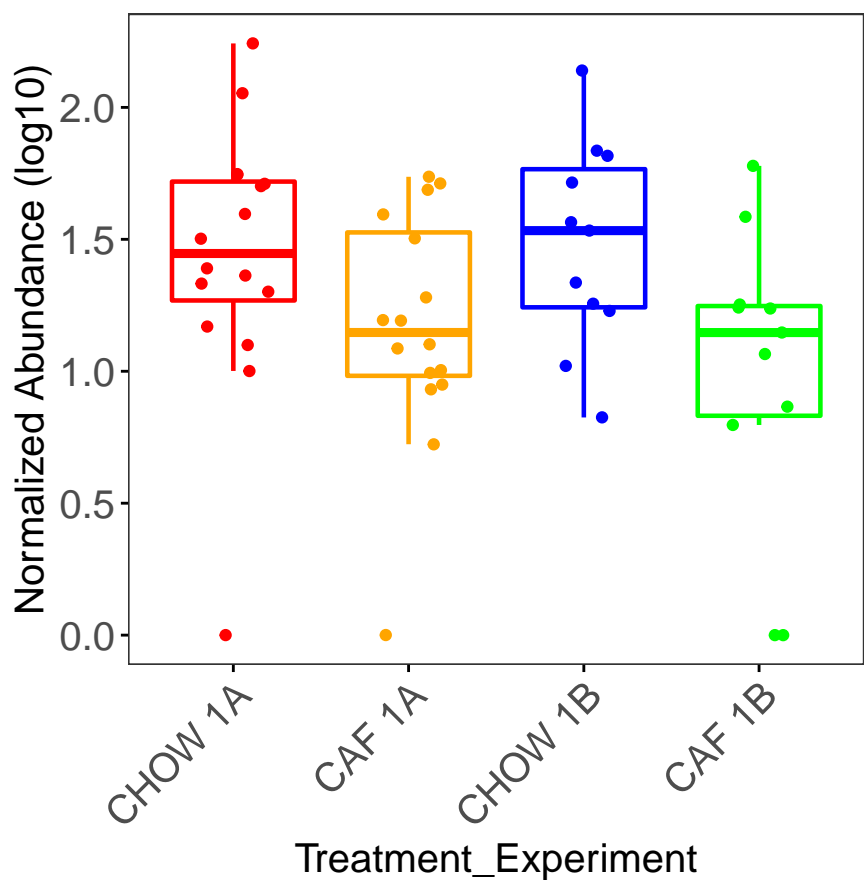

Firmicutes.D.2\_\_Clostridia.D.3\_\_Clostridiales.D.4\_\_Lachnospiraceae.D.5\_\_[Eubacterium] xylanophilum group.D.6\_\_uncultured bacterium  
Experiment 1A FDR = 0.72981  
Experiment 1B FDR = 0.04333

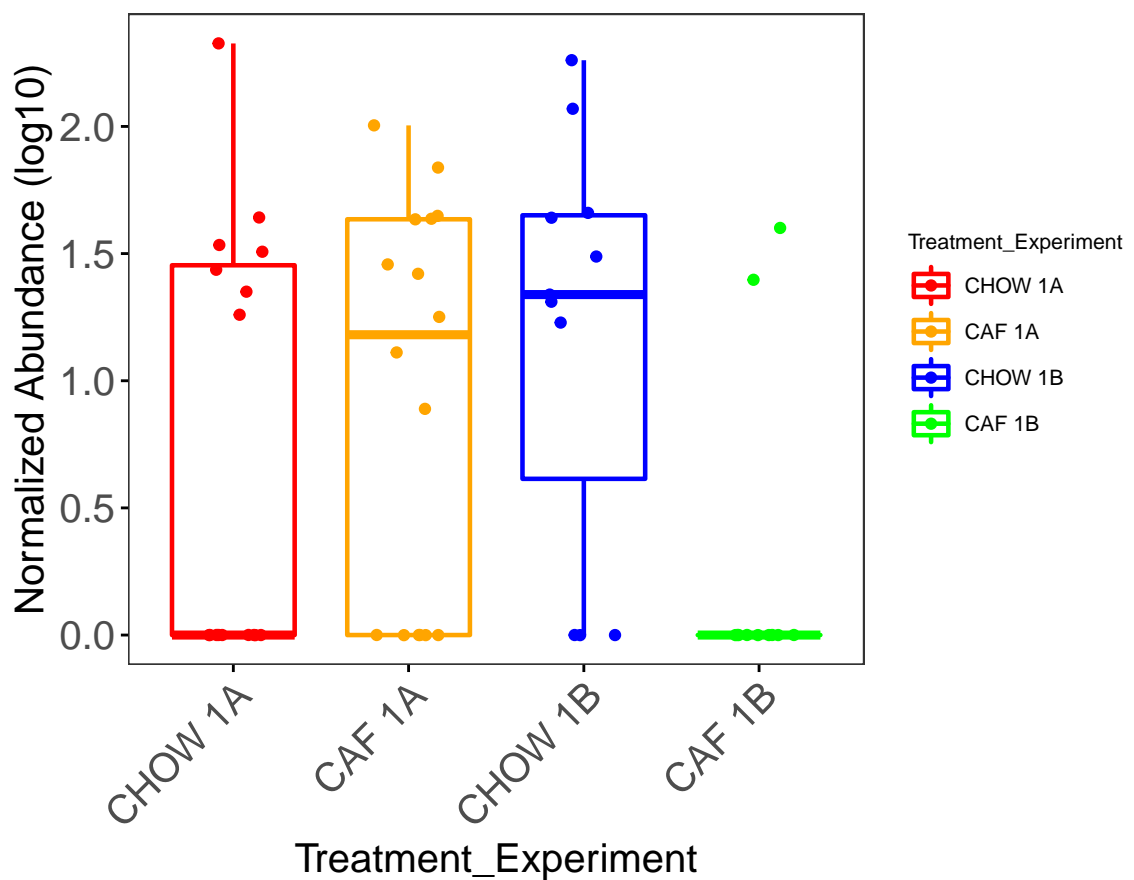

Firmicutes.D.2\_\_Clostridia.D.3\_\_Clostridiales.D.4\_\_Christensenellaceae.D.5\_\_Christensenellaceae R-7 group.D.6\_\_uncultured prokaryote  
Experiment 1A FDR = 0.92743  
Experiment 1B FDR = 0.08077

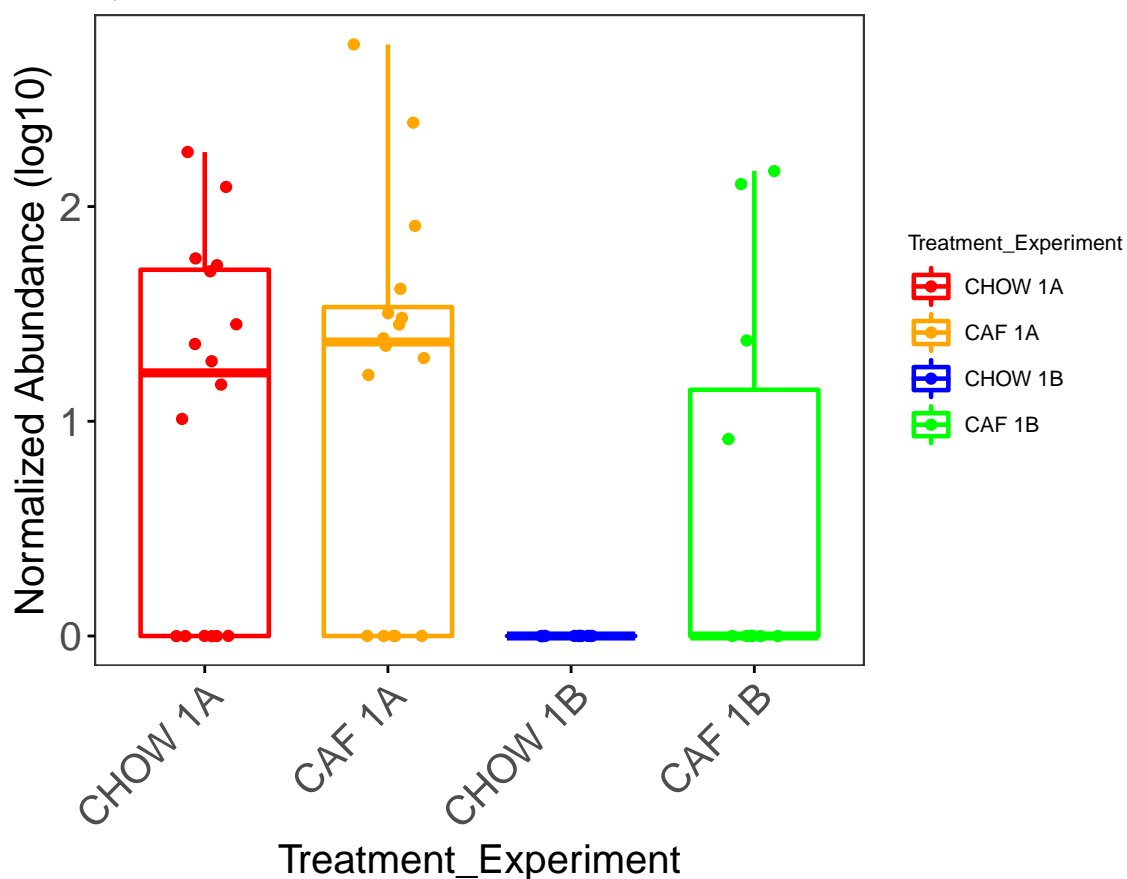

Firmicutes.D.2\_\_Clostridia.D.3\_\_Clostridiales.D.4\_\_Family XIII.....  
Experiment 1A FDR = 0.66879  
Experiment 1B FDR = 0.04208

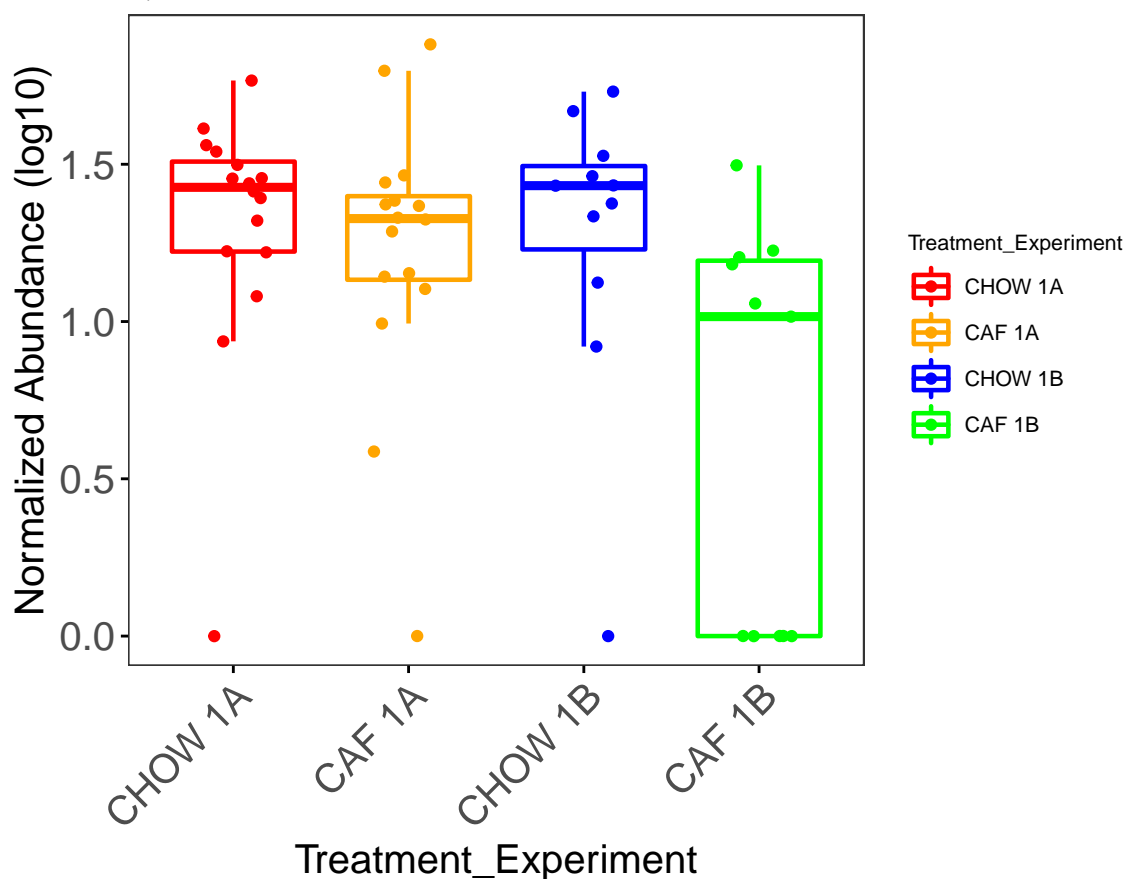

Firmicutes.D.2\_\_Clostridia.D.3\_\_Clostridiales.D.4\_\_Ruminococcaceae.D.5\_\_Ruminococcaceae NK4A214 group.D.6\_\_gut metagenome  
Experiment 1A FDR = 1  
Experiment 1B FDR = 0.0191

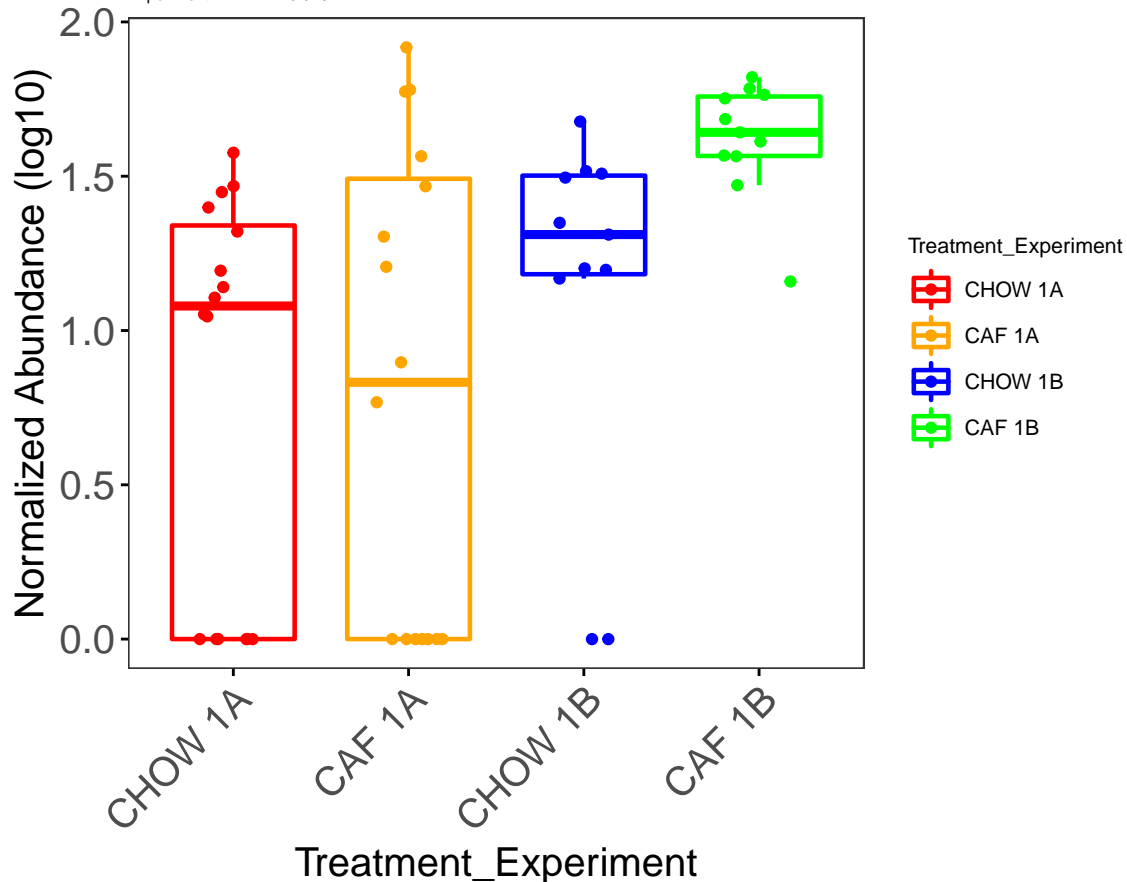

Firmicutes.D.2\_\_Clostridia.D.3\_\_Clostridiales.D.4\_\_Lachnospiraceae.D.5\_\_[Ruminococcus] gnnavus group.....  
Experiment 1A FDR = 0.72245  
Experiment 1B FDR = 0.05541

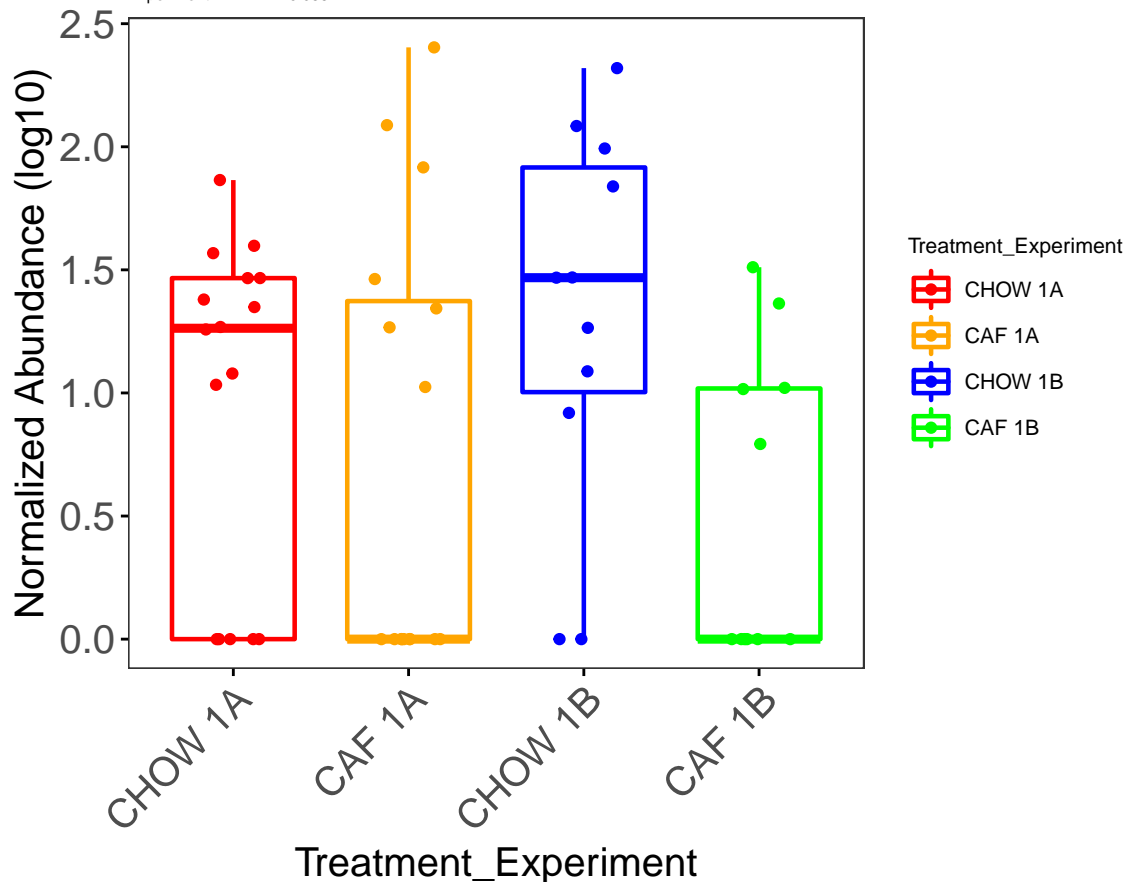



Firmicutes.D.2\_\_Erysipelotrichia.D.3\_\_Erysipelotrichales.D.4\_\_Erysipelotrichaceae\_\_\_\_\_  
Experiment 1A FDR = 0.4837  
Experiment 1B FDR = 0.00213

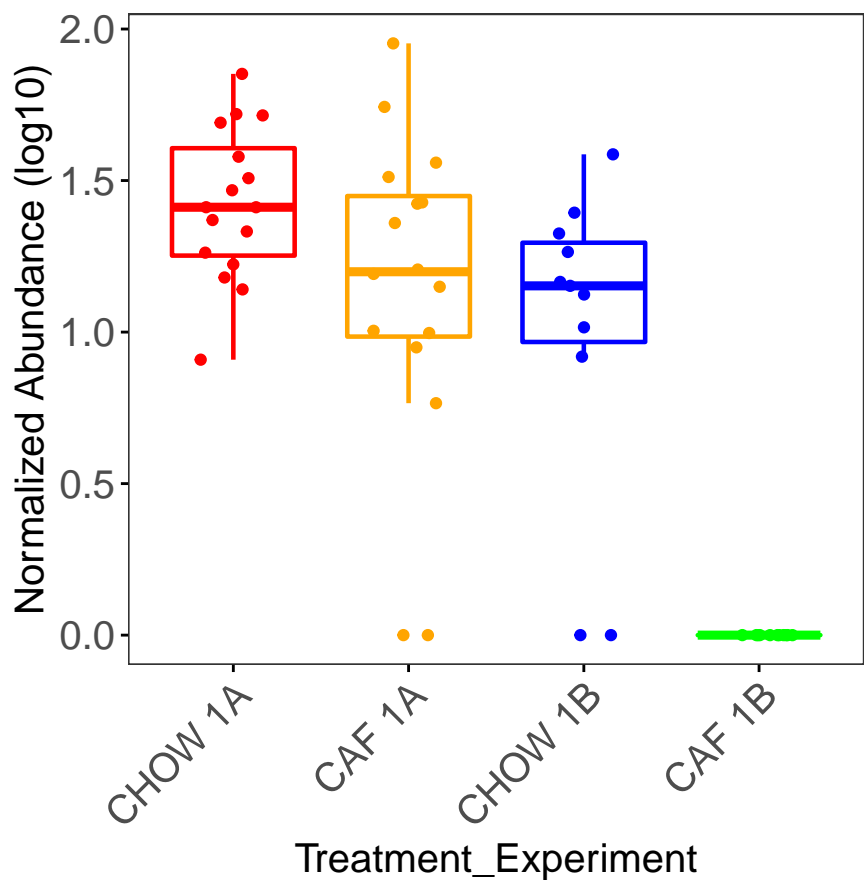

Firmicutes.D.2\_\_Clostridia.D.3\_\_Clostridiales.D.4\_\_Ruminococcaceae.D.5\_\_Ruminiclostridium 5.D.6\_\_uncultured Clostridiales bacterium\_\_\_\_\_  
Experiment 1A FDR = 0.46744  
Experiment 1B FDR = 0.06081

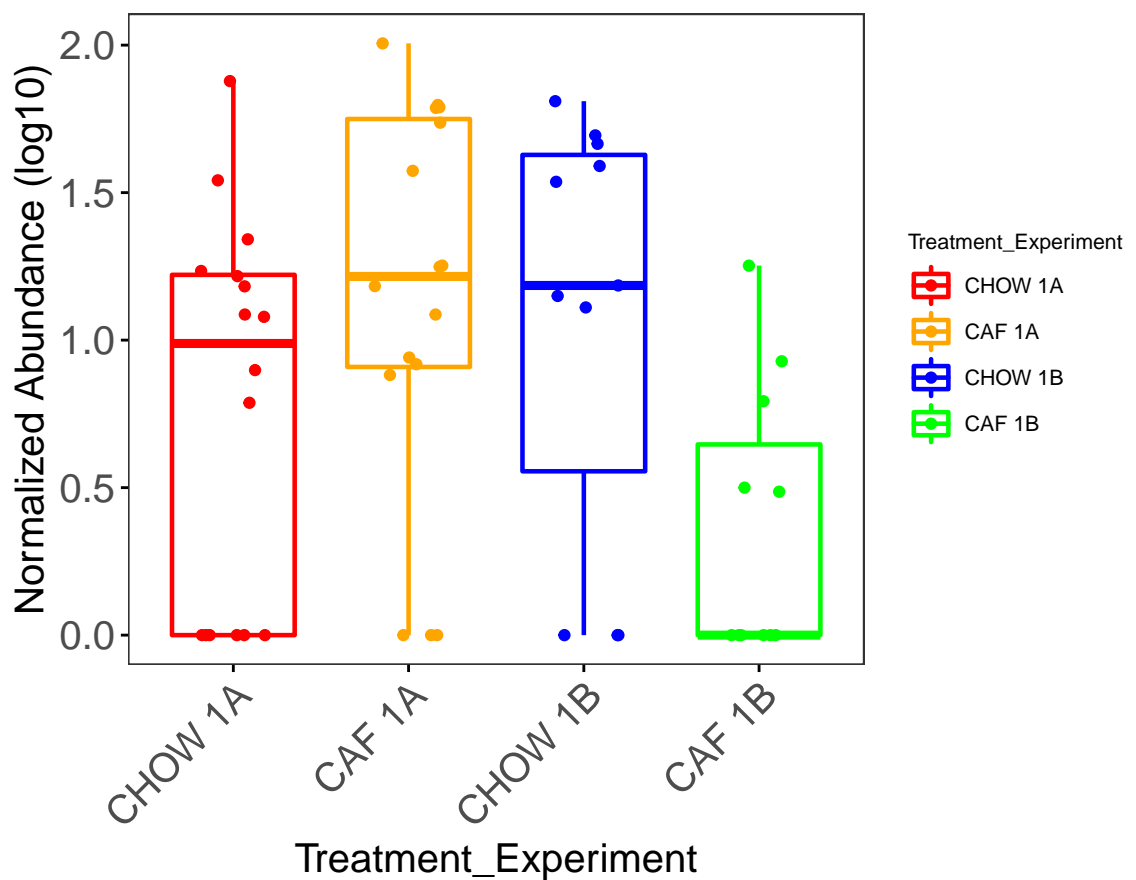

Firmicutes.D.2\_\_Clostridia.D.3\_\_Clostridiales.D.4\_\_Lachnospiraceae.D.5\_\_Sellimonas.D.6\_\_uncultured Blautia sp\_\_\_\_\_  
Experiment 1A FDR = 0.25475  
Experiment 1B FDR = 0.06201

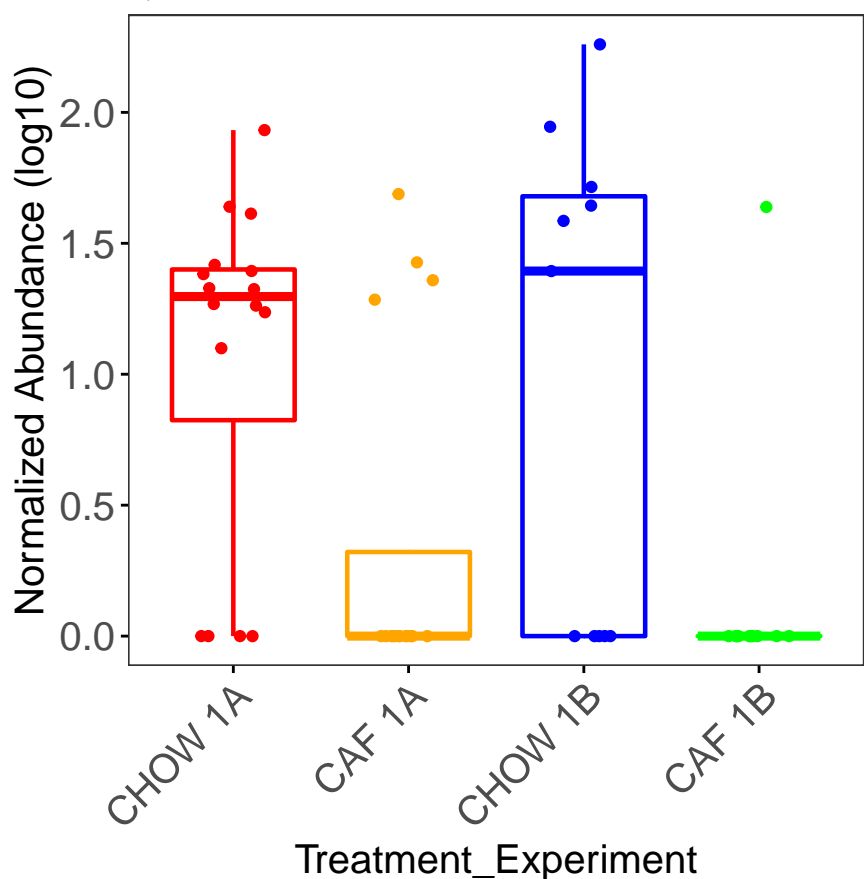

Firmicutes.D.2\_\_Clostridia.D.3\_\_Clostridiales.D.4\_\_Ruminococcaceae.D.5\_\_Harryflintia.D.6\_\_uncultured bacterium\_\_\_\_\_  
Experiment 1A FDR = 0.96678  
Experiment 1B FDR = 0.03821

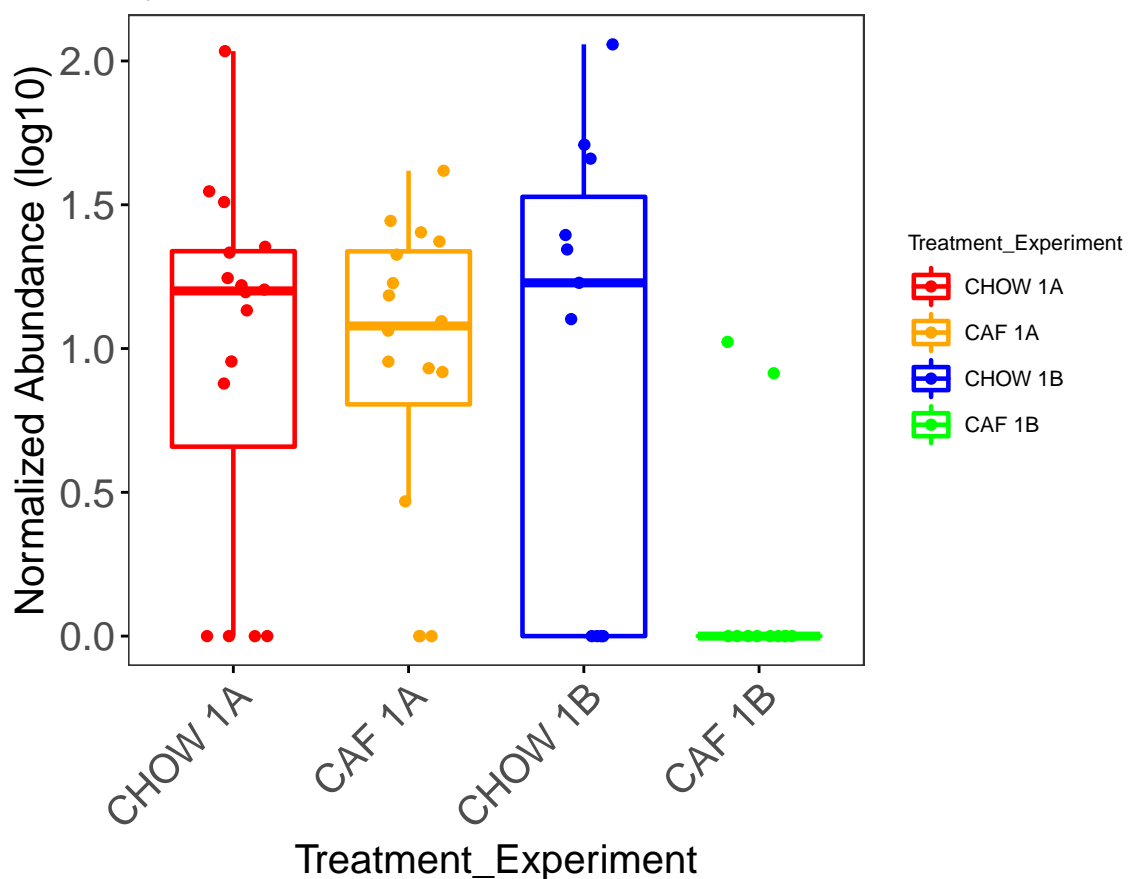

Proteobacteria.D.2\_\_Gammaproteobacteria.D.3\_\_Betaproteobacteriales.D.4\_\_Burkholderiaceae\_\_\_\_\_  
Experiment 1A FDR = 0.02174  
Experiment 1B FDR = 0.29191

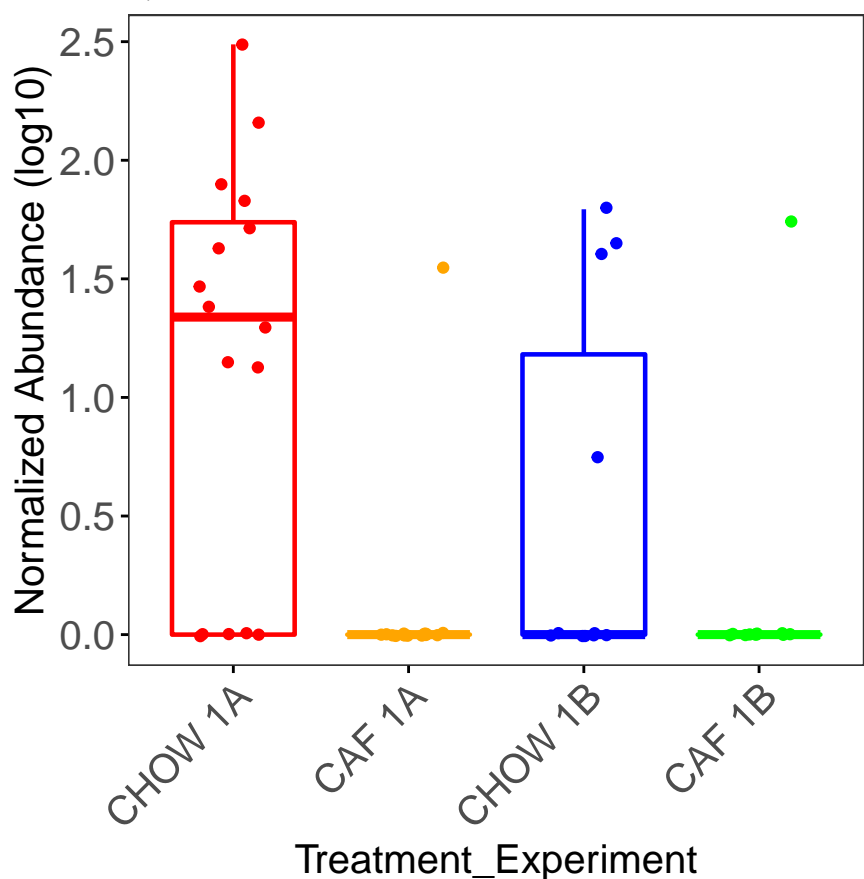

Firmicutes.D.2\_\_Clostridia.D.3\_\_Clostridiales.D.4\_\_Lachnospiraceae.D.5\_\_[Eubacterium] ventriosum group.D.6\_\_uncultured Clostridiales bacterium\_\_\_\_\_  
Experiment 1A FDR = 0.52548  
Experiment 1B FDR = 0.0248

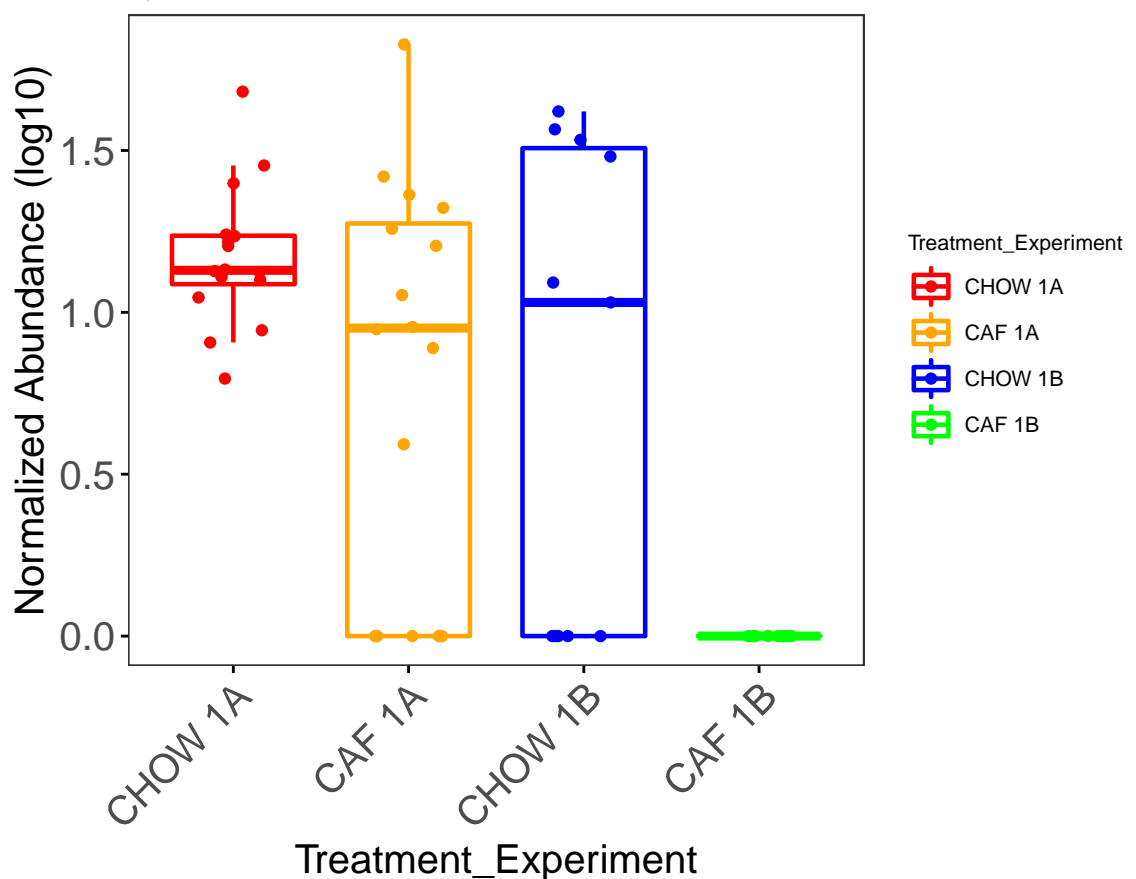

Firmicutes.D.2\_\_Clostridia.D.3\_\_Clostridiales.D.4\_\_Ruminococcaceae.D.5\_\_Intestinimonas...  
Experiment 1A FDR = 1  
Experiment 1B FDR = 0.04107

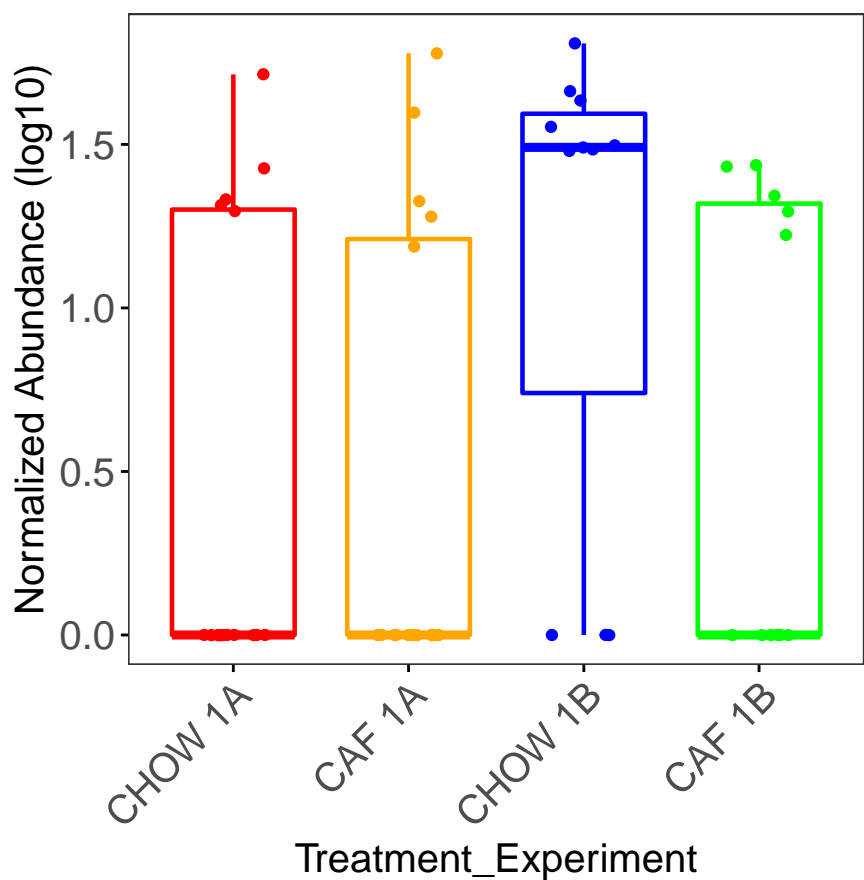

Treatment\_Experiment  
CHOW 1A  
CAF 1A  
CHOW 1B  
CAF 1B

Firmicutes.D.2\_\_Clostridia.D.3\_\_Clostridiales.D.4\_\_Ruminococcaceae.D.5\_\_Ruminococcaceae UCG-005.D.6\_\_uncultured Clostridiales bacte...  
Experiment 1A FDR = 0.96074  
Experiment 1B FDR = 0.00213

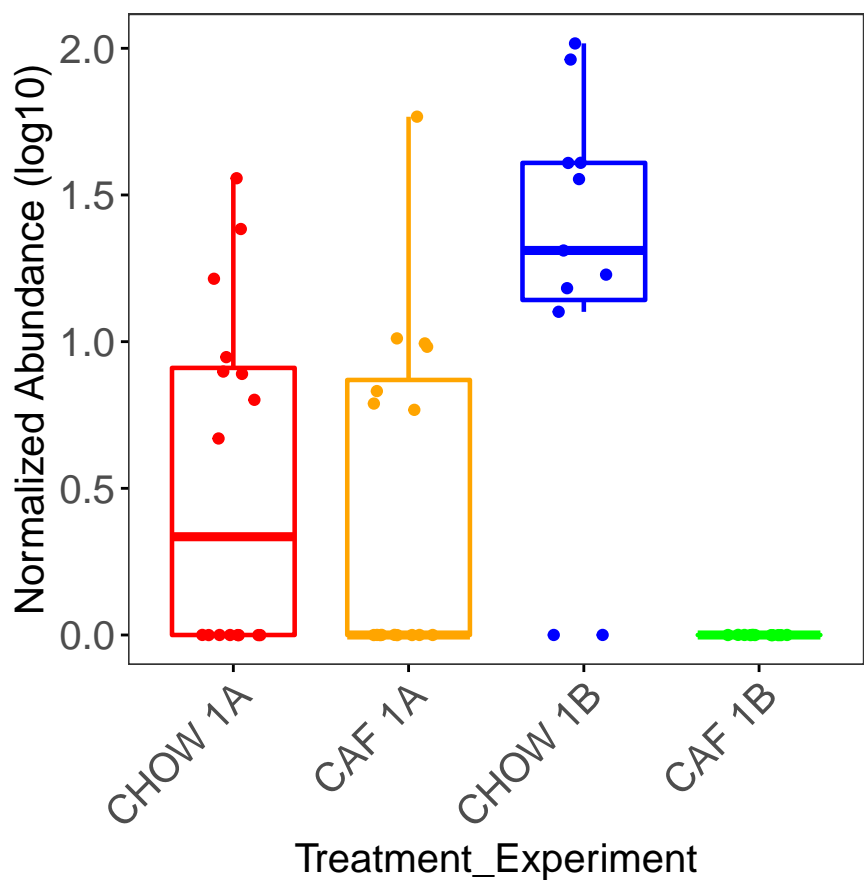

Treatment\_Experiment  
CHOW 1A  
CAF 1A  
CHOW 1B  
CAF 1B

Cyanobacteria.D.2\_\_Melainabacteria.D.3\_\_Gastranaerophilales...  
Experiment 1A FDR = 0.81489  
Experiment 1B FDR = 0.03157

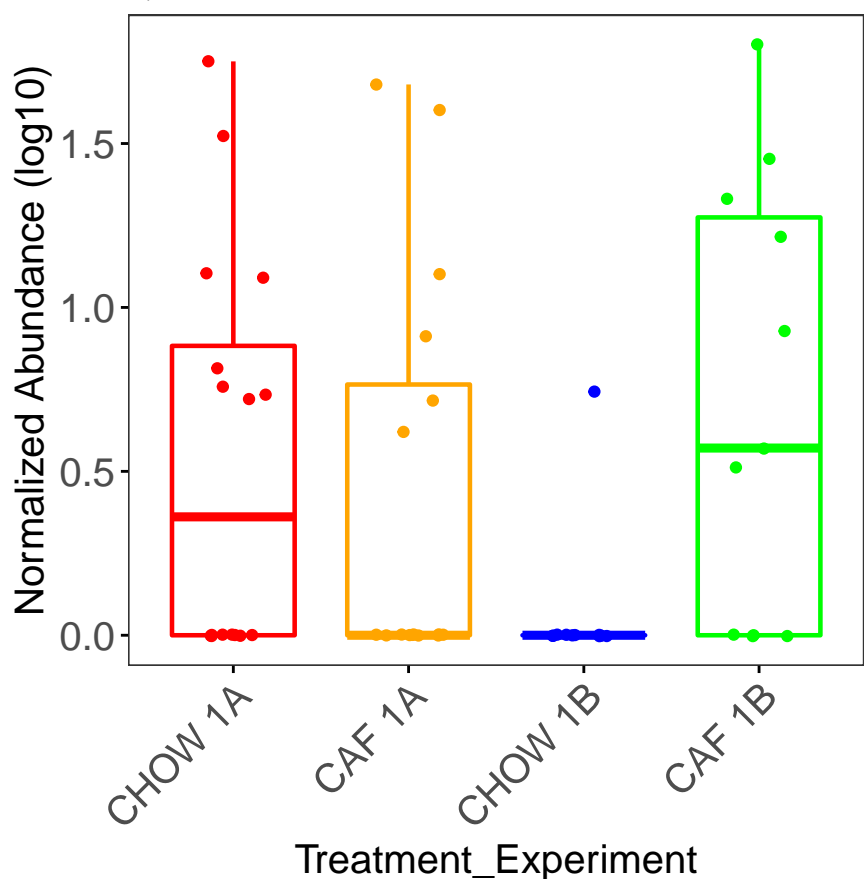

Treatment\_Experiment  
CHOW 1A  
CAF 1A  
CHOW 1B  
CAF 1B

Firmicutes.D.2\_\_Clostridia.D.3\_\_Clostridiales.D.4\_\_Ruminococcaceae.D.5\_\_Candidatus Soleaeferrea.D.6\_\_Bittarella massiliensis  
Experiment 1A FDR = 0.60275  
Experiment 1B FDR = 0.00145

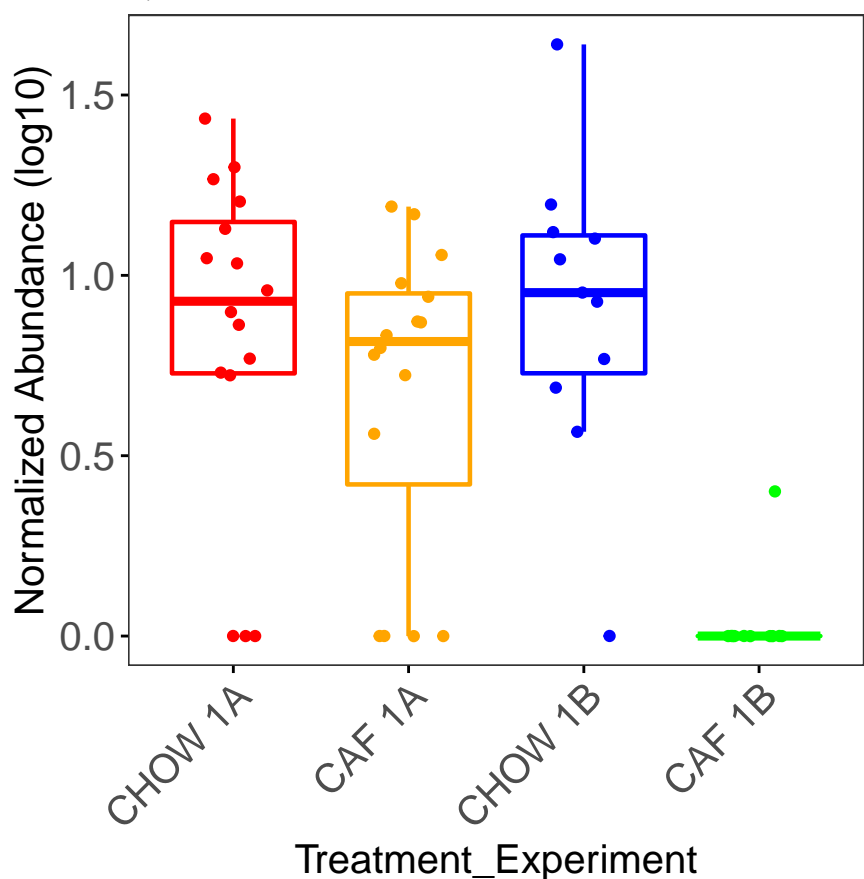

Treatment\_Experiment  
CHOW 1A  
CAF 1A  
CHOW 1B  
CAF 1B

Firmicutes.D.2\_\_Clostridia.D.3\_\_Clostridiales.D.4\_\_Family XIII.D.5\_\_Family XIII UCG-001.D.6\_\_uncultured bacterium  
Experiment 1A FDR = 1  
Experiment 1B FDR = 0.08077

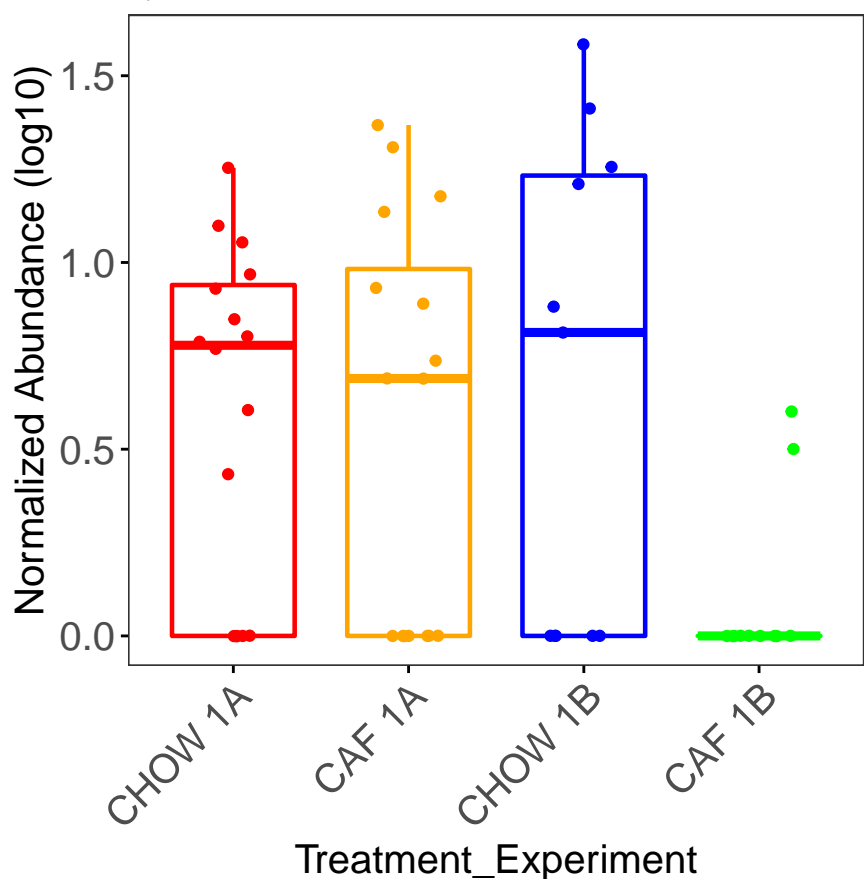

Treatment\_Experiment  
CHOW 1A  
CAF 1A  
CHOW 1B  
CAF 1B

Actinobacteria.D.2\_\_Coriobacteria.D.3\_\_Coriobacteriales.D.4\_\_Coriobacteriales Incertae Sedis.D.5\_\_uncultured.D.6\_\_gut metagenome  
Experiment 1A FDR = 0.72981  
Experiment 1B FDR = 0.00546

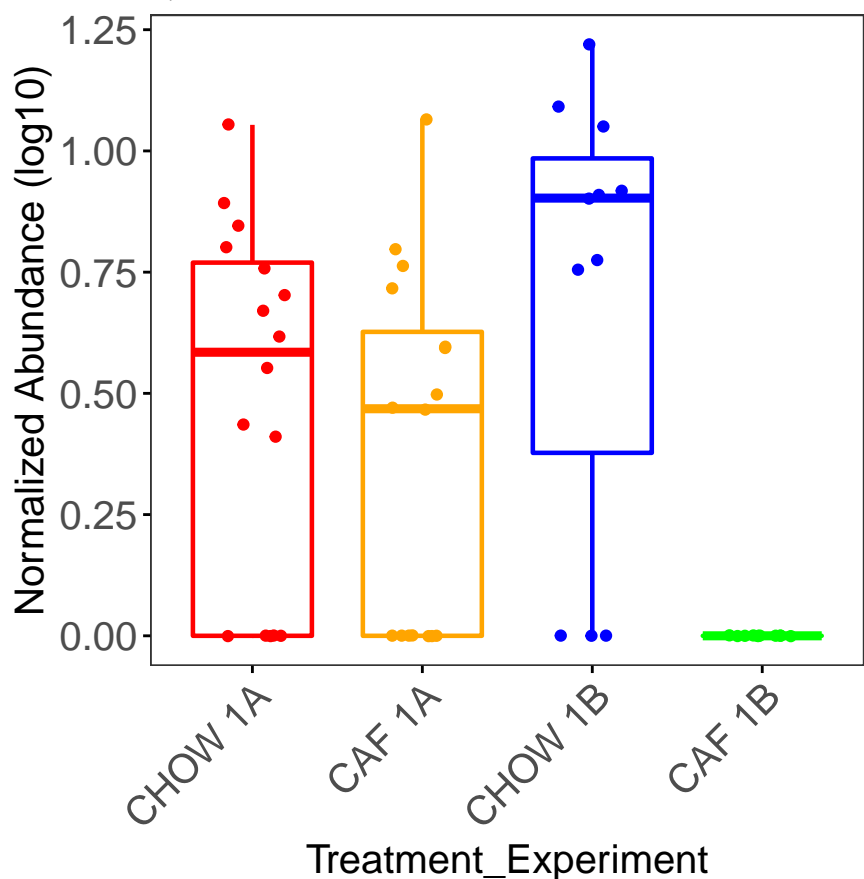

Treatment\_Experiment  
CHOW 1A  
CAF 1A  
CHOW 1B  
CAF 1B

Firmicutes.D.2\_\_Clostridia.D.3\_\_Clostridiales.D.4\_\_Lachnospiraceae.D.5\_\_Tyzzerella...  
Experiment 1A FDR = 0.80194  
Experiment 1B FDR = 0.02775

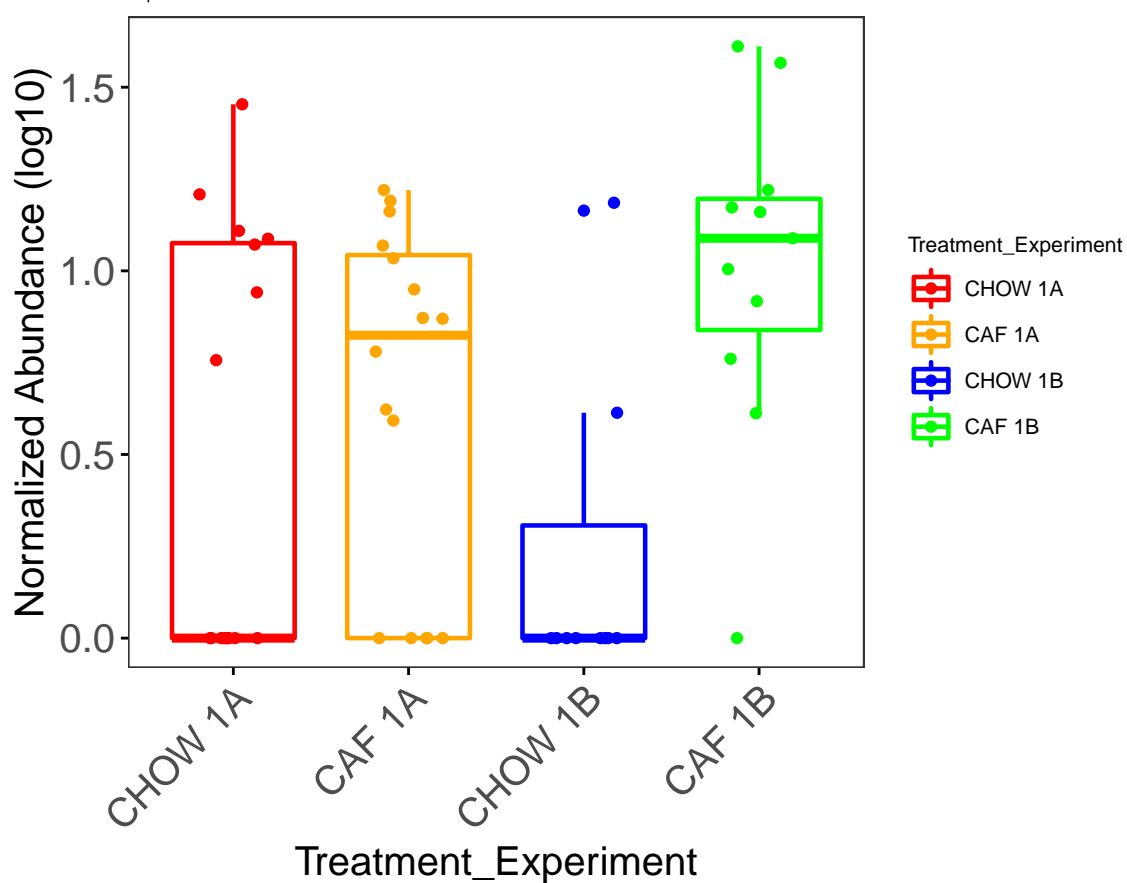

Firmicutes.D.2\_\_Clostridia.D.3\_\_Clostridiales.D.4\_\_Ruminococcaceae.D.5\_\_GCA-900066225.D.6\_\_uncultured Anaerotruncus sp...  
Experiment 1A FDR = 0.92743  
Experiment 1B FDR = 0.0274

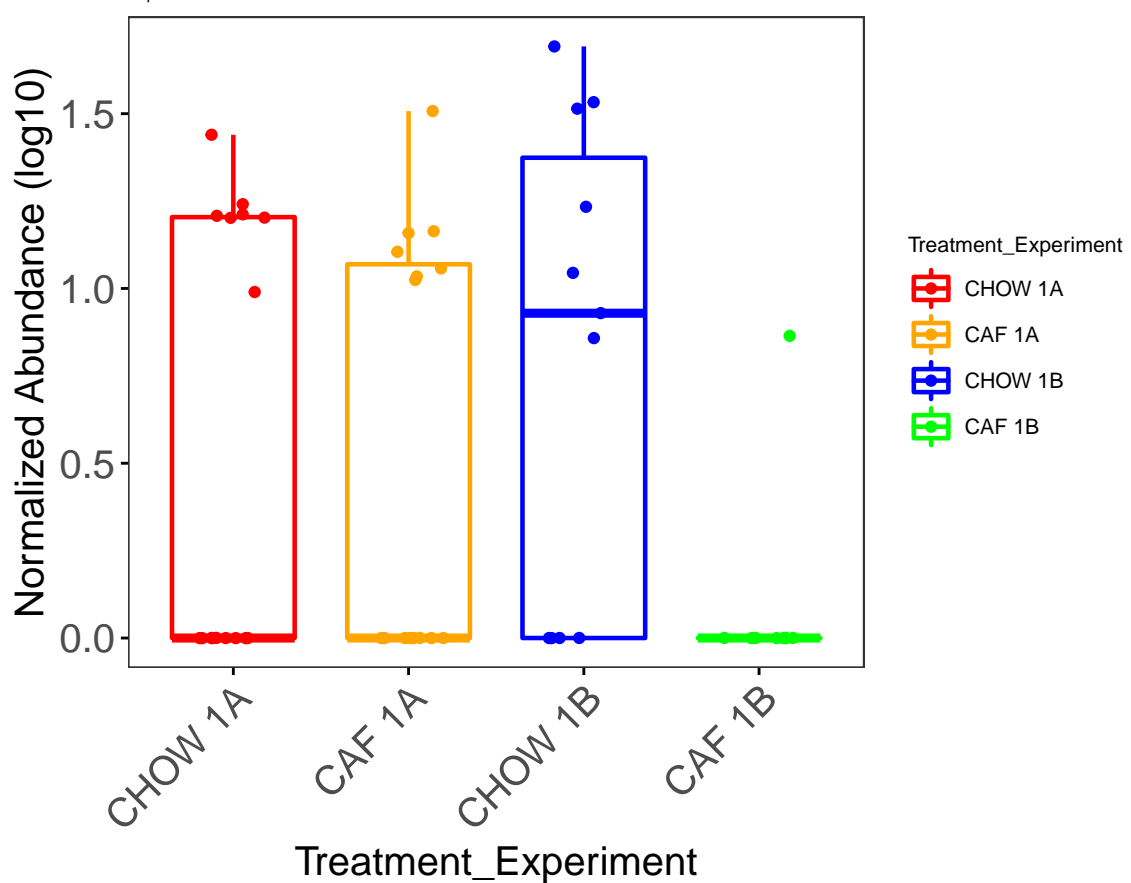

Firmicutes.D.2\_\_Clostridia.D.3\_\_Clostridiales.D.4\_\_Ruminococcaceae.D.5\_\_Ruminiclostridium 5.D.6\_\_gut metagenome  
Experiment 1A FDR = 0.54993  
Experiment 1B FDR = 0.04107

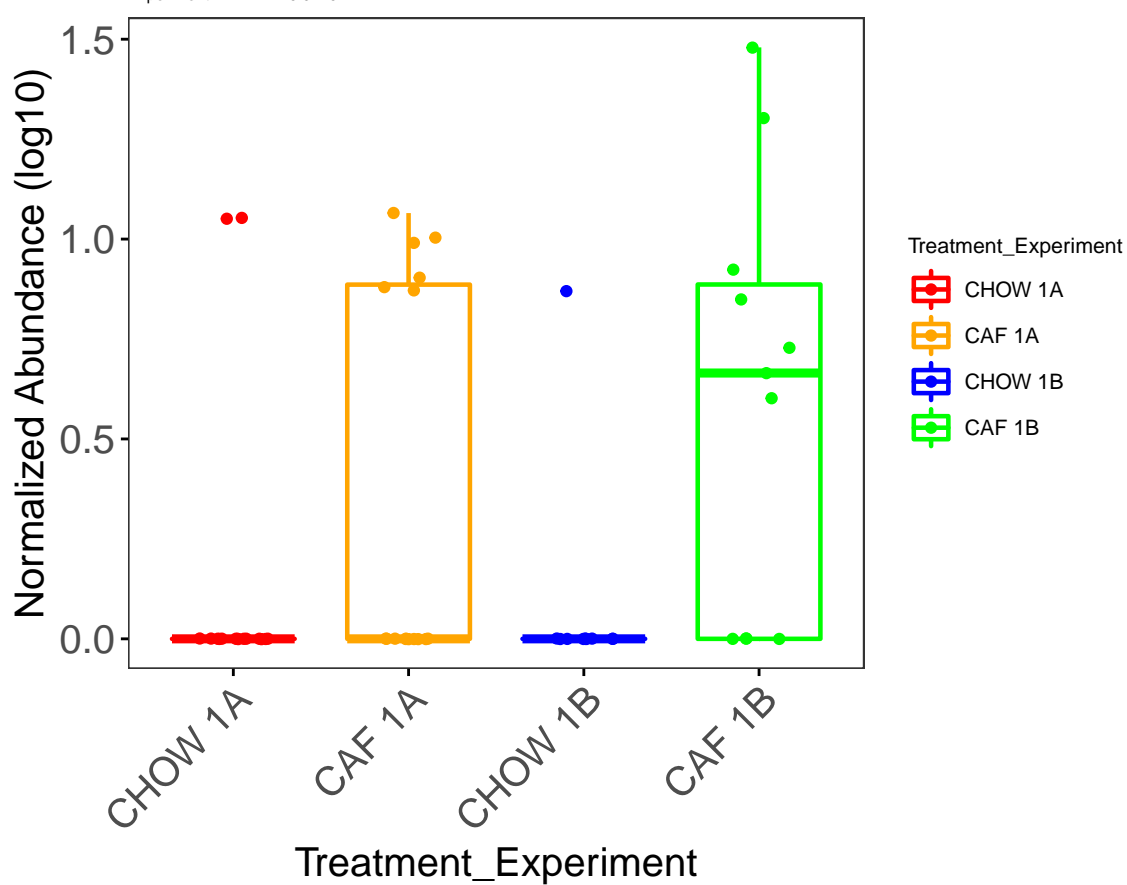

Firmicutes.D.2\_\_Clostridia.D.3\_\_Clostridiales.D.4\_\_Eubacteriaceae.D.5\_\_Anaerofustis...  
Experiment 1A FDR = 0.72981  
Experiment 1B FDR = 0.0248

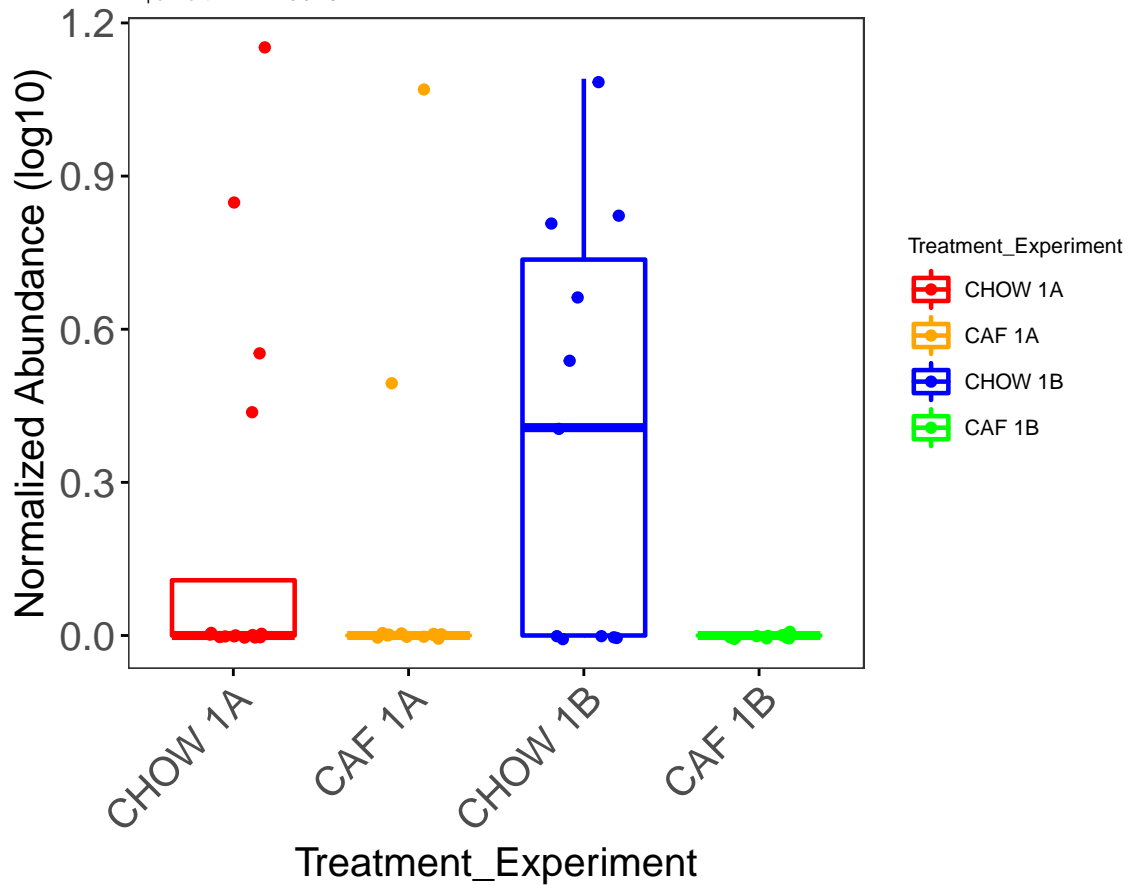

**Supplemental Figure 3 Abundance of the gut microbiota in the CAF vs CHOW groups when analyzed either before (1A) or after (1B) healthy dietary intervention. CHOW: chow-fed; CAF: cafeteria diet; FDR: false discovery rate**
