# Supplementary material
Source: PubMed Central journal article supplement (PMC8957635)
Supplement: NIHMS1741890-supplement-Figure_S4.pdf [file NIHMS1741890-supplement-Figure_S4.pdf]

Firmicutes  
Experiment 2A FDR = 0.08889  
Experiment 2B FDR = 0.01197

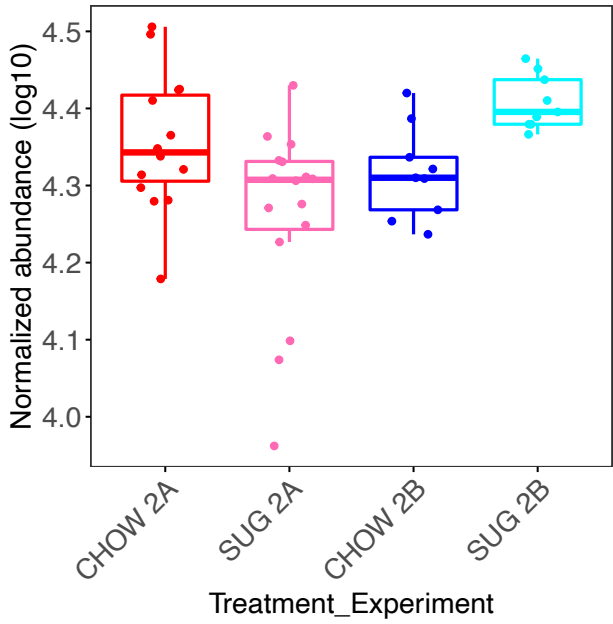

Bacteroidetes  
Experiment 2A FDR = 0.08889  
Experiment 2B FDR = 0.00074

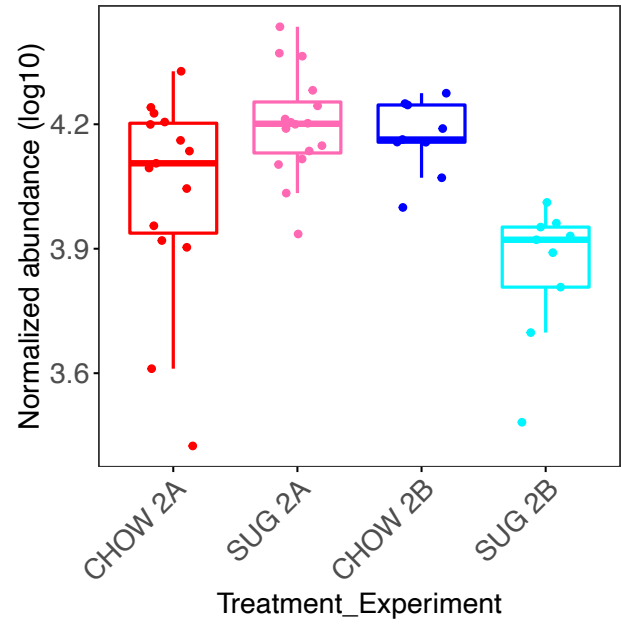

Proteobacteria  
Experiment 2A FDR = 0.08889  
Experiment 2B FDR = 0.09056

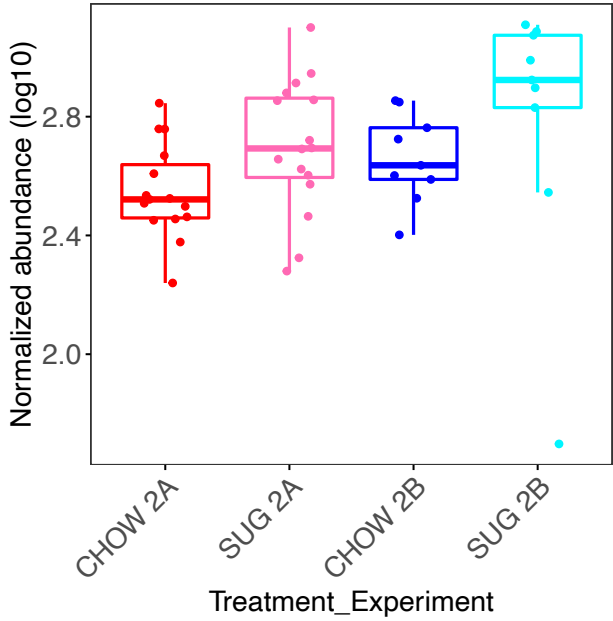

Tenericutes  
Experiment 2A FDR = 0.37123  
Experiment 2B FDR = 0.05498

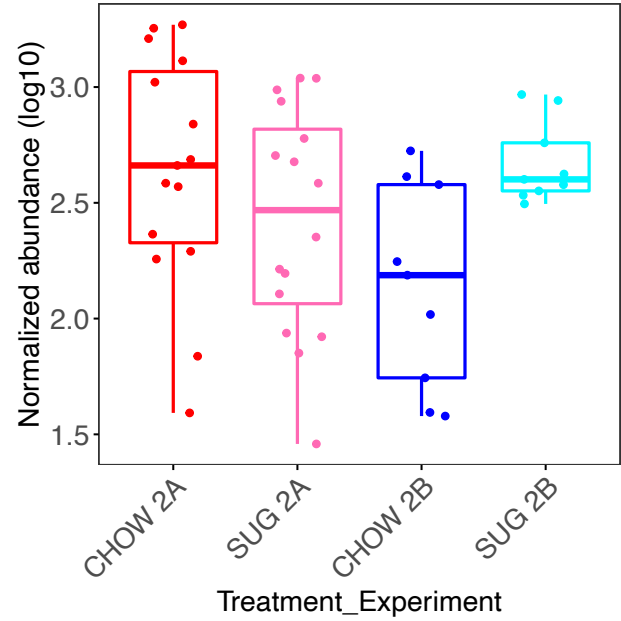

Actinobacteria  
Experiment 2A FDR = 0.43067  
Experiment 2B FDR = 0.00555

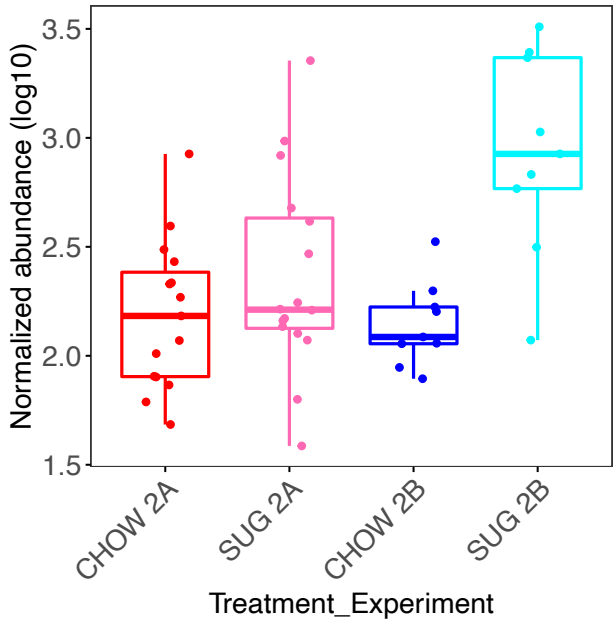

Cyanobacteria  
Experiment 2A FDR = 0.95088  
Experiment 2B FDR = 0.09471

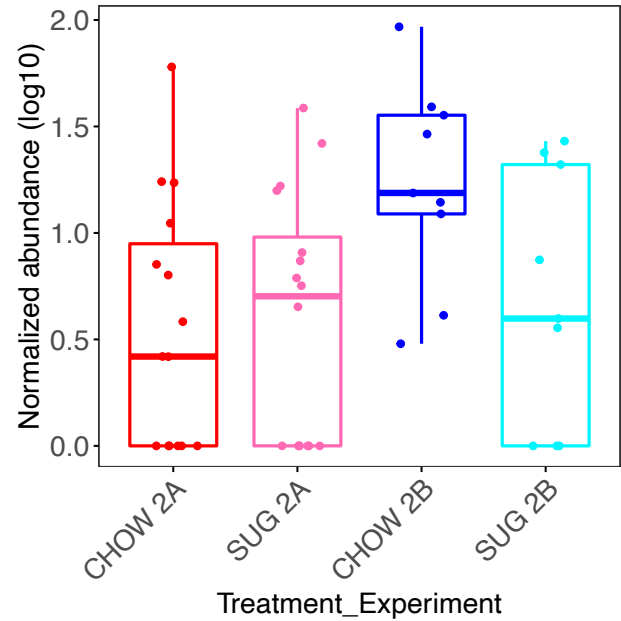

Deferribacteres  
Experiment 2A FDR = 0.08889  
Experiment 2B FDR = 0.23132

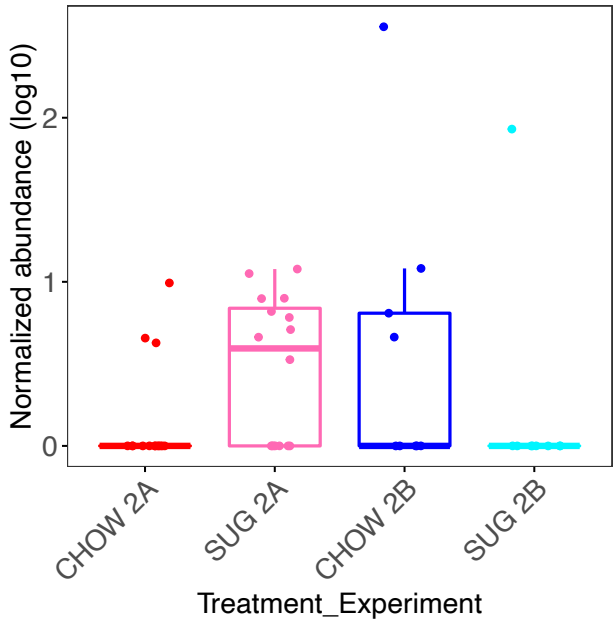

Firmicutes.D.2\_Clostridia  
Experiment 2A FDR = 0.00666  
Experiment 2B FDR = 0.64801

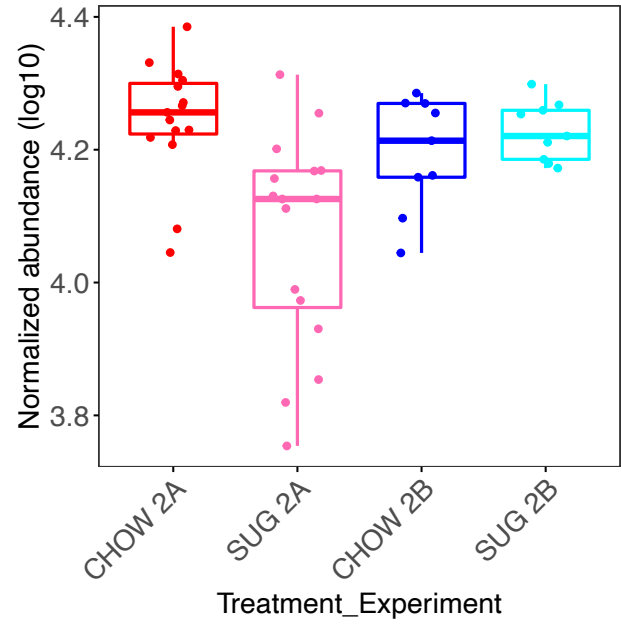

Bacteroidetes.D.2\_Bacteroidia  
Experiment 2A FDR = 0.09259  
Experiment 2B FDR = 0.00062

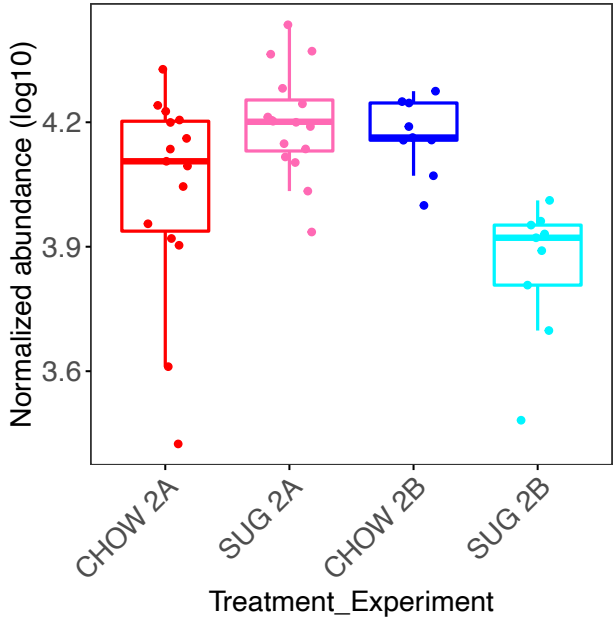

Firmicutes.D.2\_Erysipelotrichia  
Experiment 2A FDR = 0.08688  
Experiment 2B FDR = 0.00062

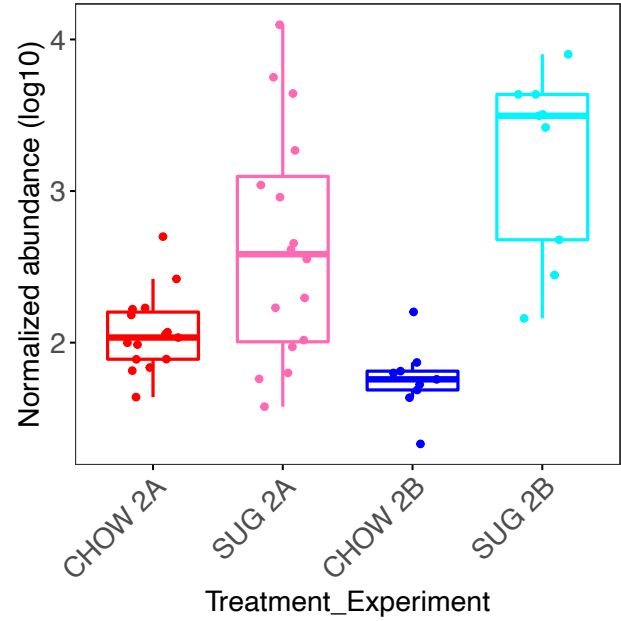

Proteobacteria.D.2\_Gammaproteobacteria  
Experiment 2A FDR = 0.01505  
Experiment 2B FDR = 0.13531

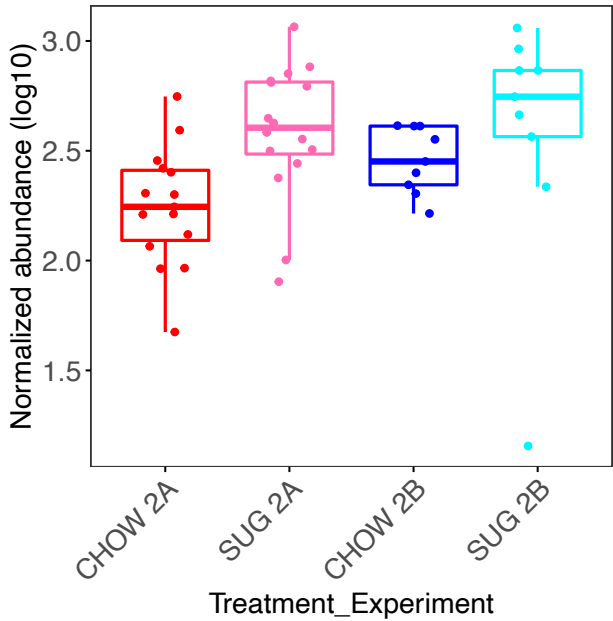

Tenericutes.D.2\_Mollicutes  
Experiment 2A FDR = 0.37123  
Experiment 2B FDR = 0.0733

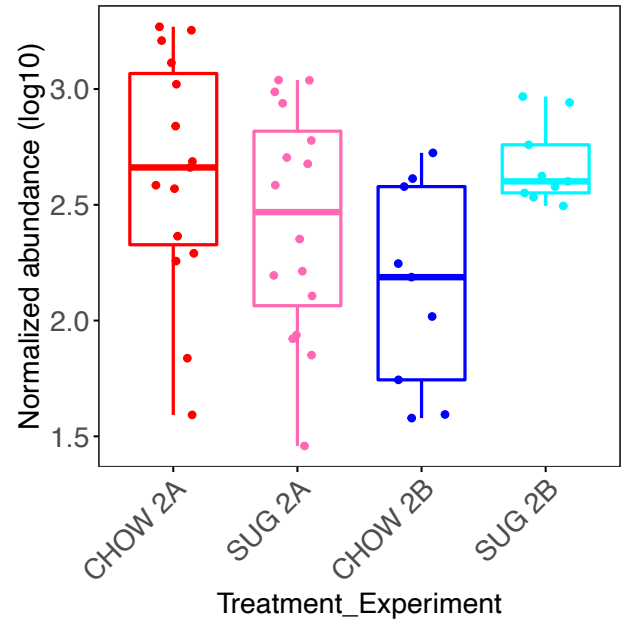

Actinobacteria.D.2\_Actinobacteria  
Experiment 2A FDR = 0.02762  
Experiment 2B FDR = 0.00082

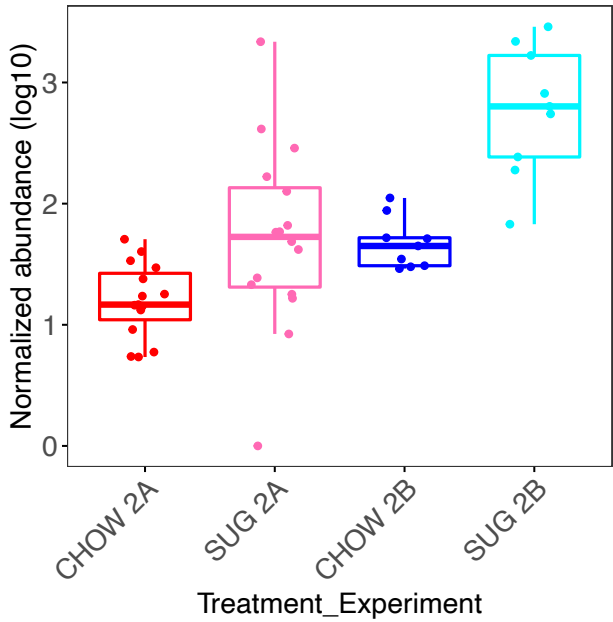

Actinobacteria.D.2\_Coriobacteria  
Experiment 2A FDR = 1  
Experiment 2B FDR = 0.0398

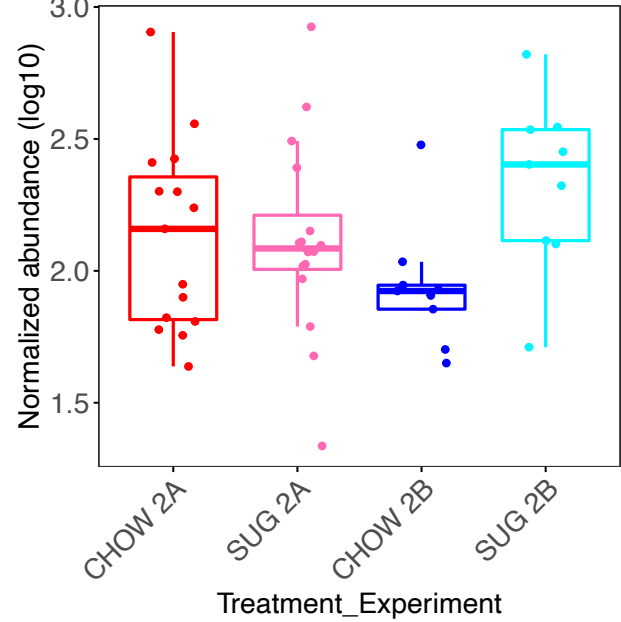

Proteobacteria.D.2\_Deltaproteobacteria  
Experiment 2A FDR = 0.05703  
Experiment 2B FDR = 0.79617

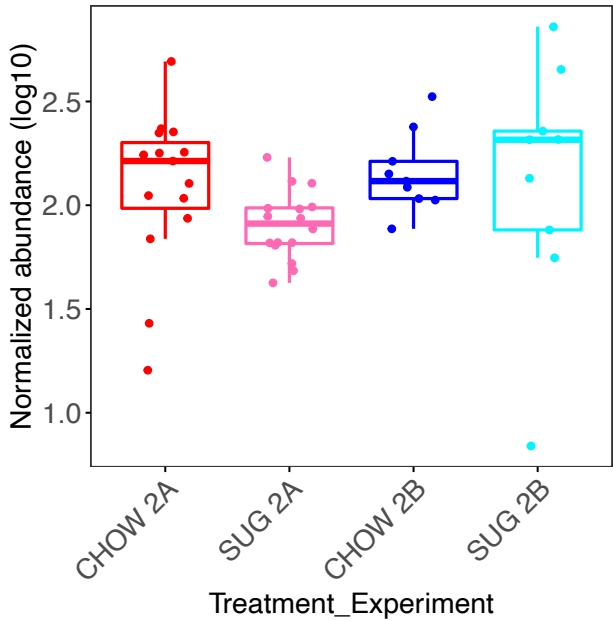

Deferribacteres.D.2\_Deferribacteres  
Experiment 2A FDR = 0.08688  
Experiment 2B FDR = 0.33734

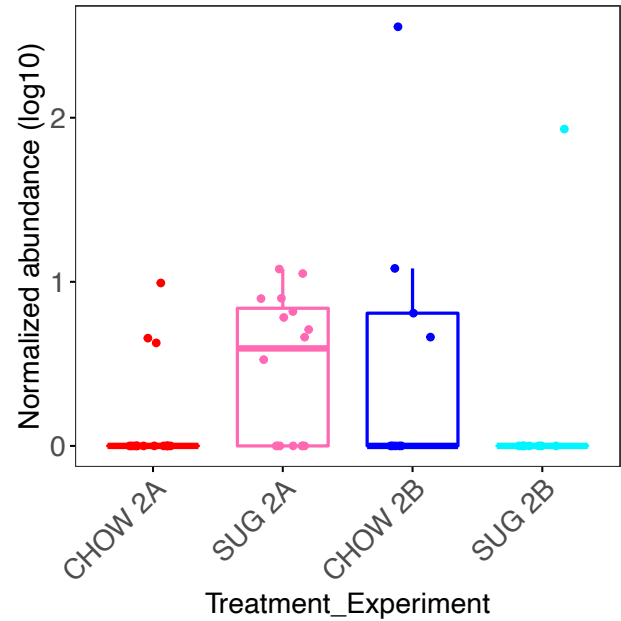

Firmicutes.D.2\_Clostridia.D.3\_Clostridiales  
Experiment 2A FDR = 0.00739  
Experiment 2B FDR = 0.66529

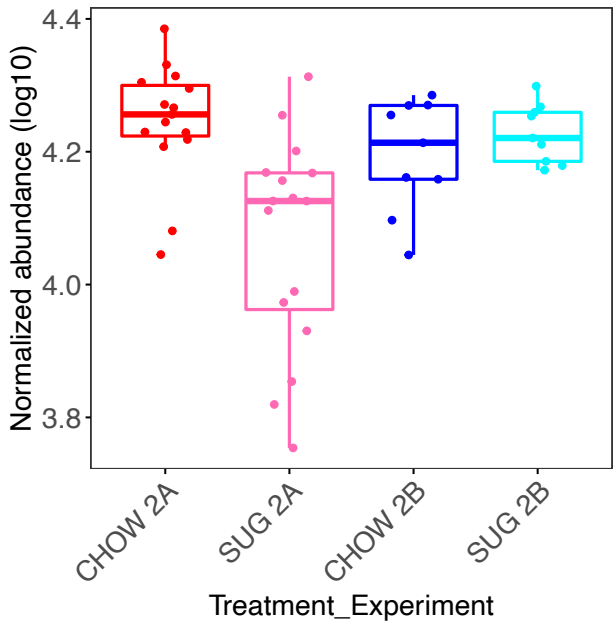

Bacteroidetes.D.2\_Bacteroidia.D.3\_Bacteroidales  
Experiment 2A FDR = 0.21213  
Experiment 2B FDR = 9e-04

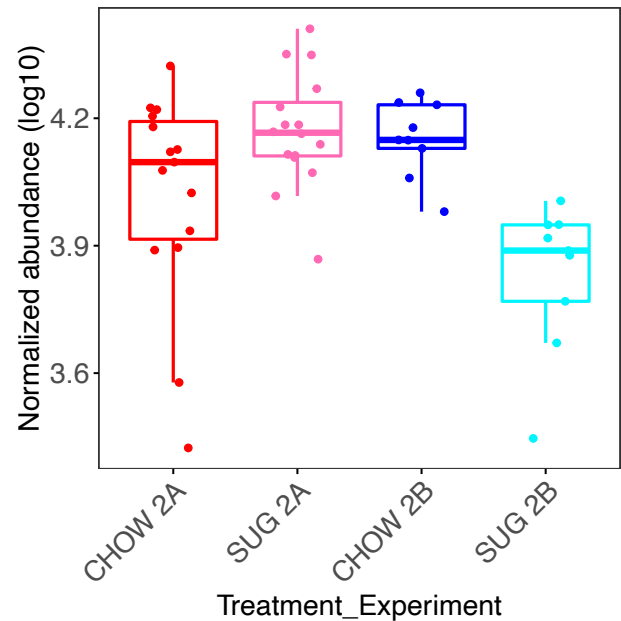

Firmicutes.D.2\_Erysipelotrichia.D.3\_Erysipelotrichales  
Experiment 2A FDR = 0.0325  
Experiment 2B FDR = 9e-04

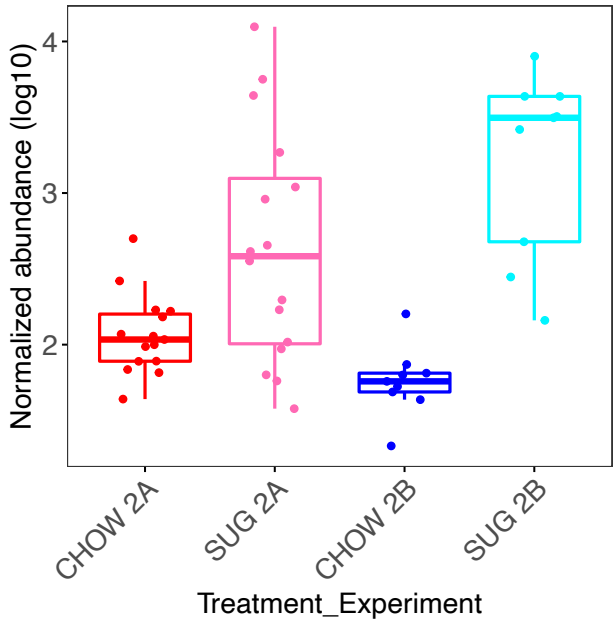

Proteobacteria.D.2\_Gammaproteobacteria.D.3\_Betaproteobacteriales  
Experiment 2A FDR = 0.00986  
Experiment 2B FDR = 0.59819

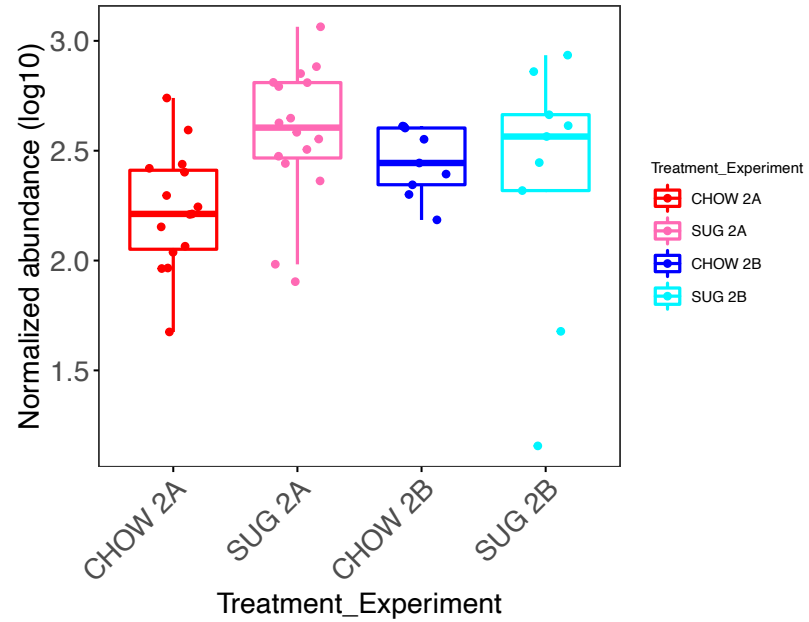

Tenericutes.D.2\_Mollicutes.D.3\_Mollicutes RF39  
Experiment 2A FDR = 0.49791  
Experiment 2B FDR = 0.08959

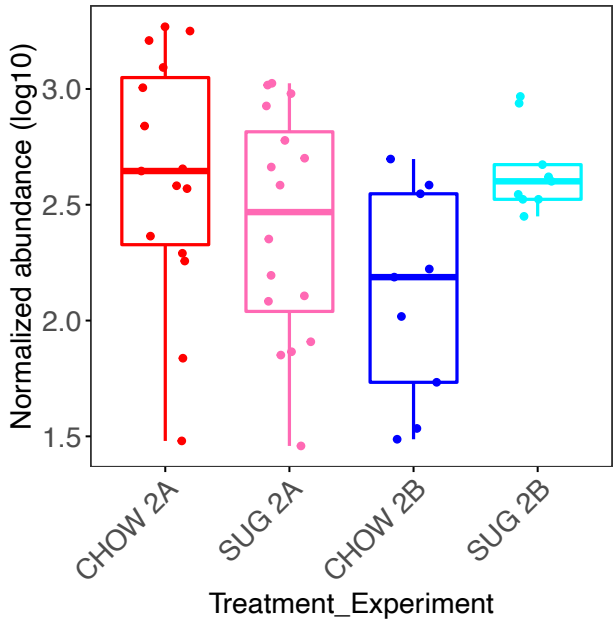

Bacteroidetes.D.2\_Bacteroidia\_\_\_\_  
Experiment 2A FDR = 0.00738  
Experiment 2B FDR = 0.08253

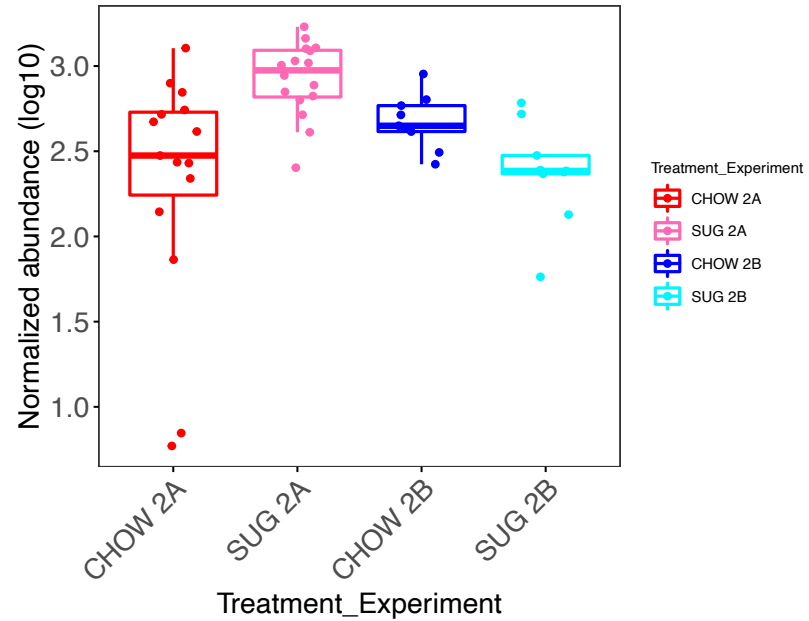

Actinobacteria.D.2\_Actinobacteria.D.3\_Bifidobacteriales  
Experiment 2A FDR = 0.00738  
Experiment 2B FDR = 0.00362

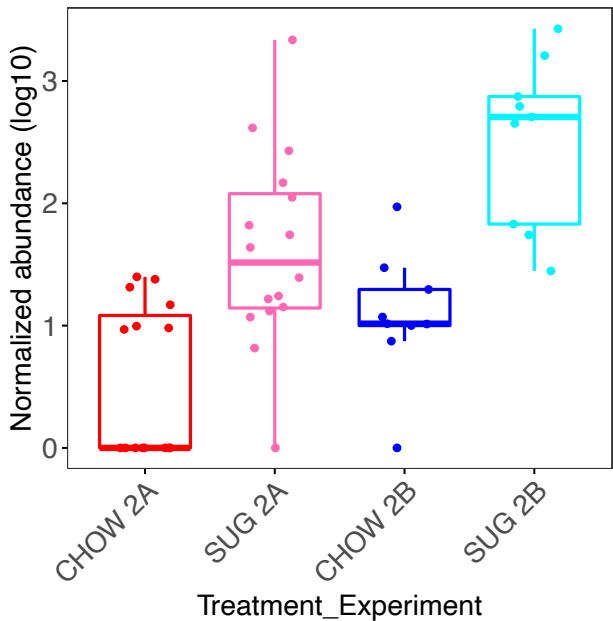

Actinobacteria.D.2\_Coriobacteria.D.3\_Coriobacteriales  
Experiment 2A FDR = 1  
Experiment 2B FDR = 0.05837

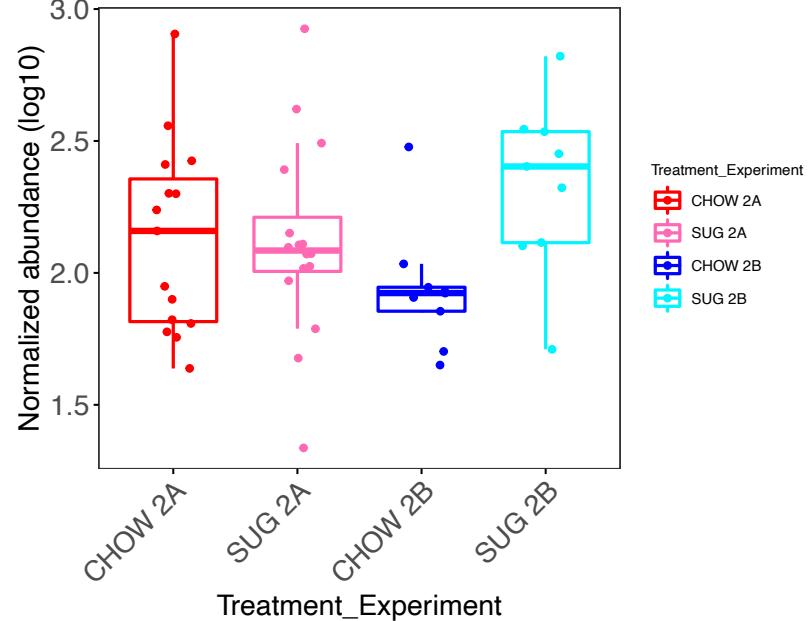

Proteobacteria.D.2\_Deltaproteobacteria.D.3\_Desulfovibrionales  
Experiment 2A FDR = 0.04997  
Experiment 2B FDR = 0.79617

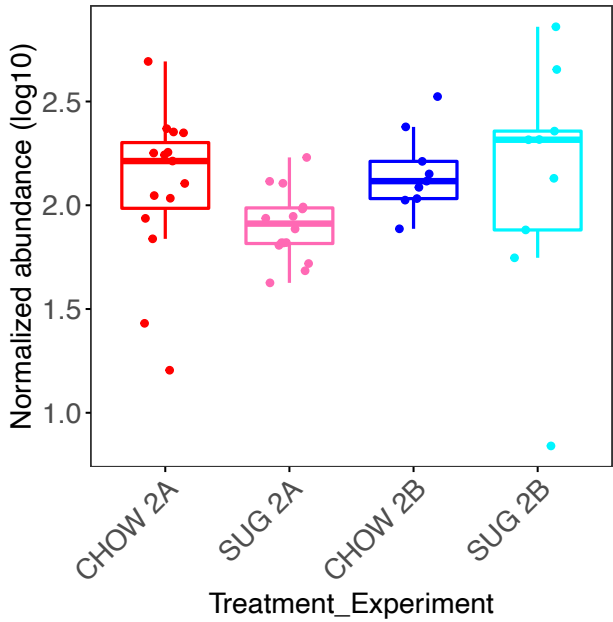

Deferribacteres.D.2\_Deferribacteres.D.3\_Deferribacterales  
Experiment 2A FDR = 0.08314  
Experiment 2B FDR = 0.32964

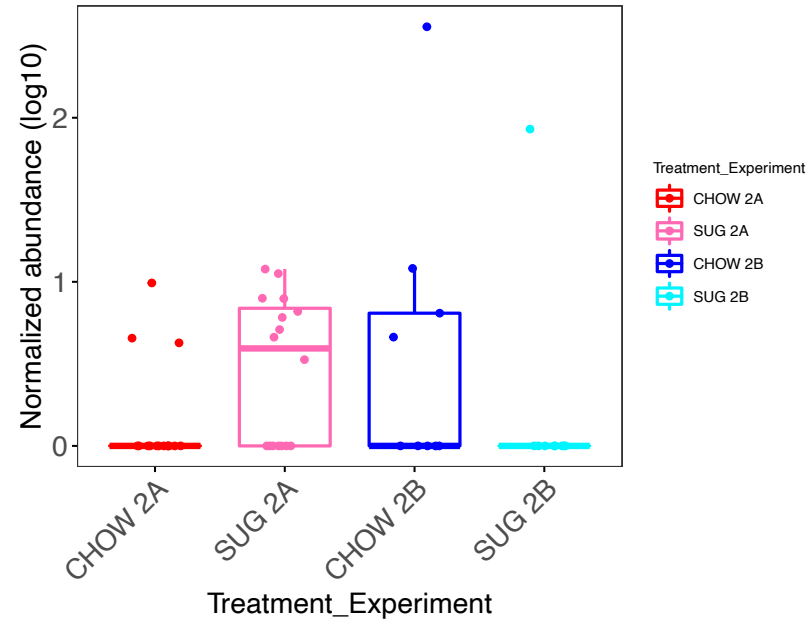

Bacteroidetes.D.2\_Bacteroidia.D.3\_Flavobacteriales  
Experiment 2A FDR = 0.01384  
Experiment 2B FDR = 0.75004

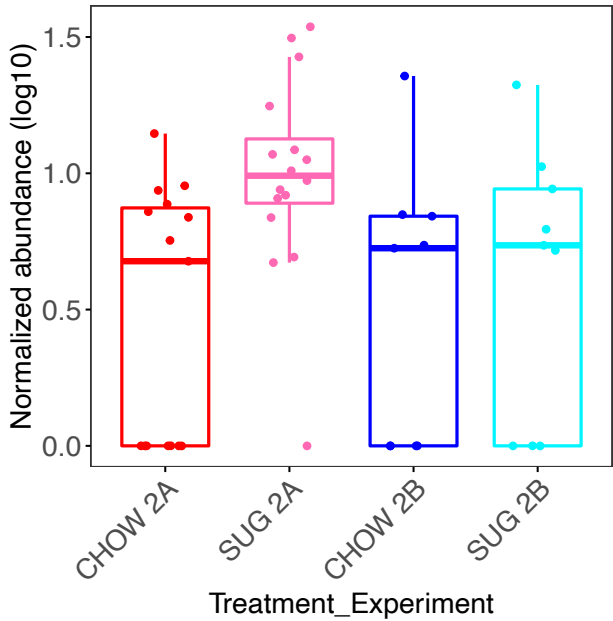

Proteobacteria.D.2\_Alphaproteobacteria\_...  
Experiment 2A FDR = 0.01384  
Experiment 2B FDR = 0.299

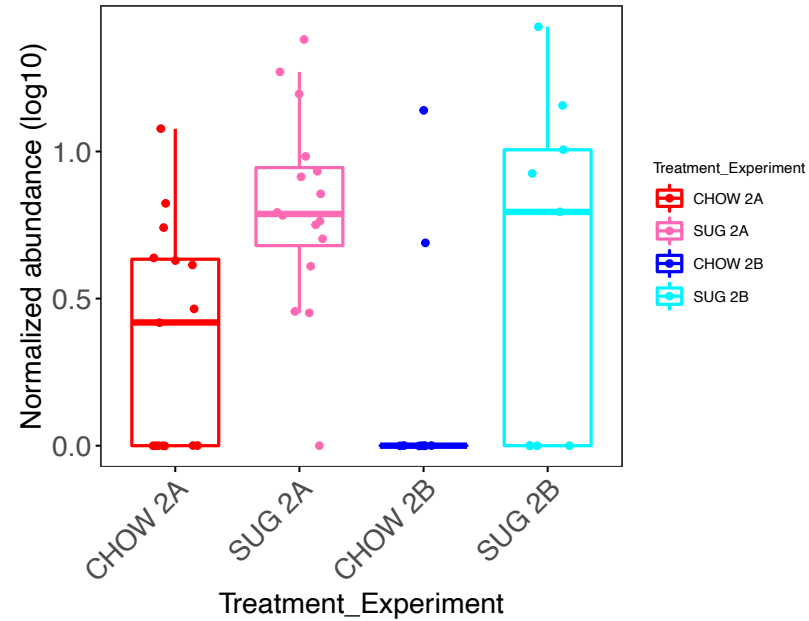

Firmicutes.D.2\_Clostridia.D.3\_Clostridiales.D.4\_Ruminococaceae  
Experiment 2A FDR = 0.01173  
Experiment 2B FDR = 0.52577

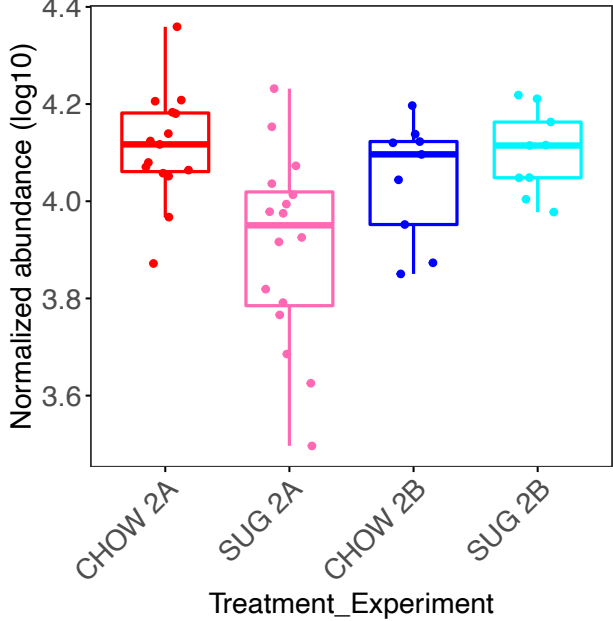

Bacteroidetes.D.2\_Bacteroidia.D.3\_Bacteroidales.D.4\_Muribaculaceae  
Experiment 2A FDR = 0.62391  
Experiment 2B FDR = 0.00387

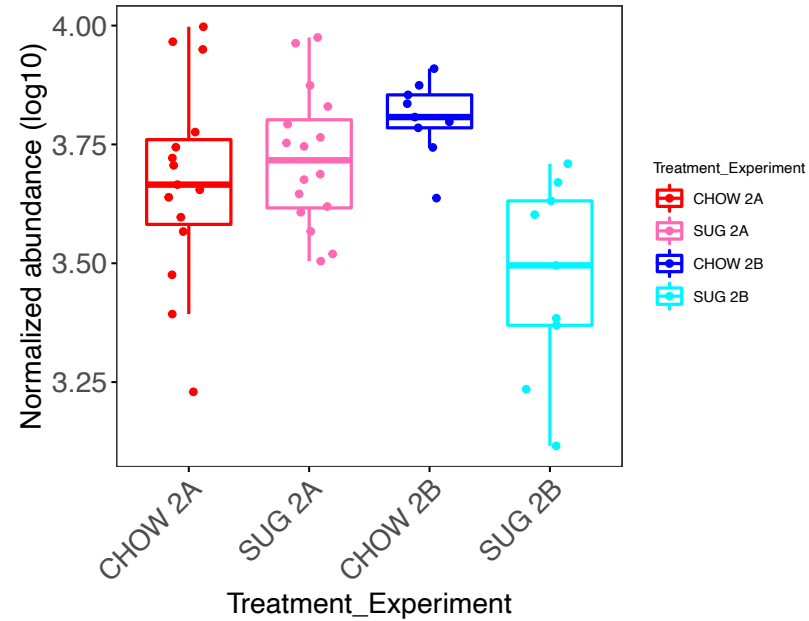

Firmicutes.D.2\_\_Erysipelotrichia.D.3\_\_Erysipelotrichales.D.4\_\_Erysipelotrichaceae  
Experiment 2A FDR = 0.11447  
Experiment 2B FDR = 0.00387

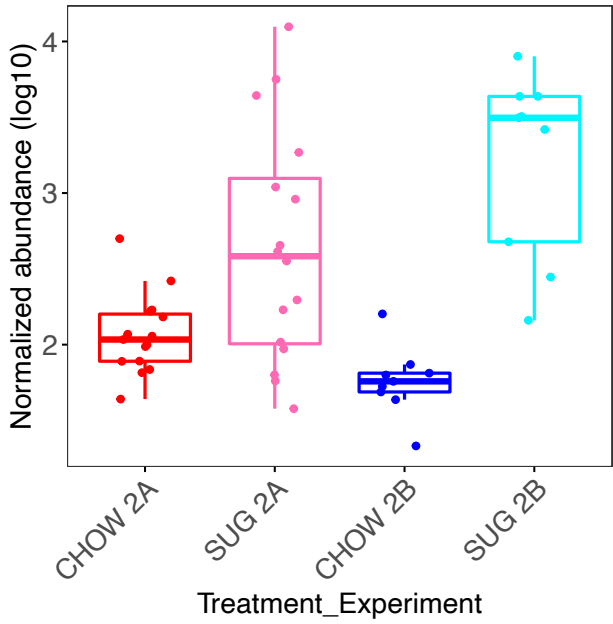

Bacteroidetes.D.2\_\_Bacteroidia.D.3\_\_Bacteroidales\_\_\_  
Experiment 2A FDR = 0.34626  
Experiment 2B FDR = 0.08816

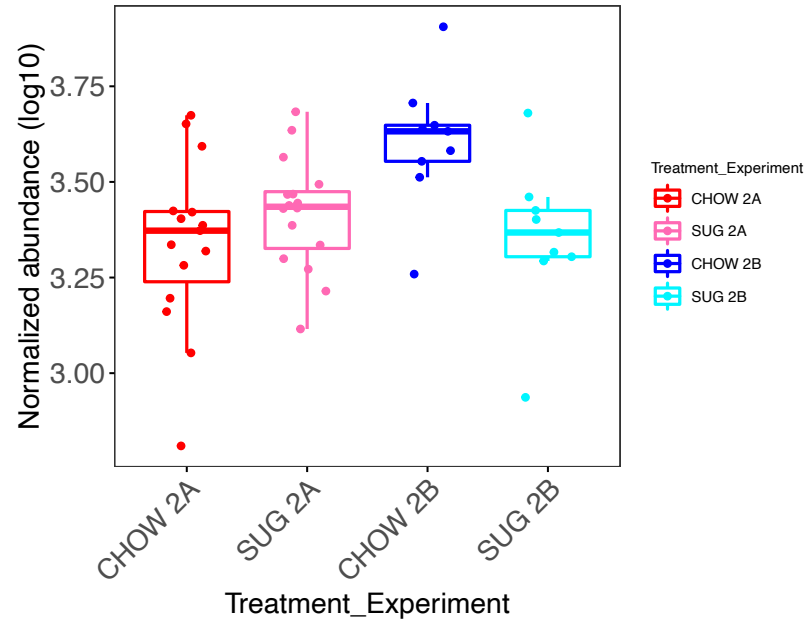

Bacteroidetes.D.2\_\_Bacteroidia.D.3\_\_Bacteroidales.D.4\_\_Prevotellaceae  
Experiment 2A FDR = 0.17862  
Experiment 2B FDR = 0.00967

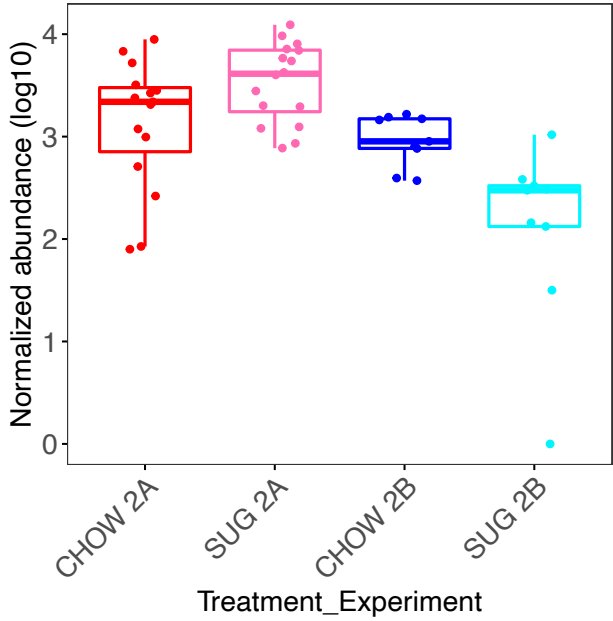

Bacteroidetes.D.2\_\_Bacteroidia.D.3\_\_Bacteroidales.D.4\_\_Bacteroidaceae  
Experiment 2A FDR = 0.06838  
Experiment 2B FDR = 0.1044

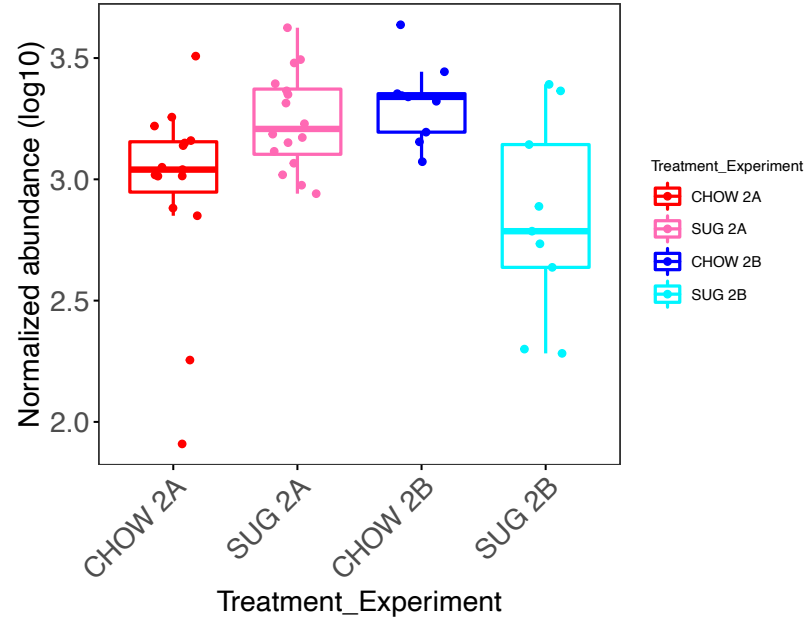

Firmicutes.D.2\_\_Clostridia.D.3\_\_Clostridiales\_\_\_  
Experiment 2A FDR = 0.73851  
Experiment 2B FDR = 0.04568

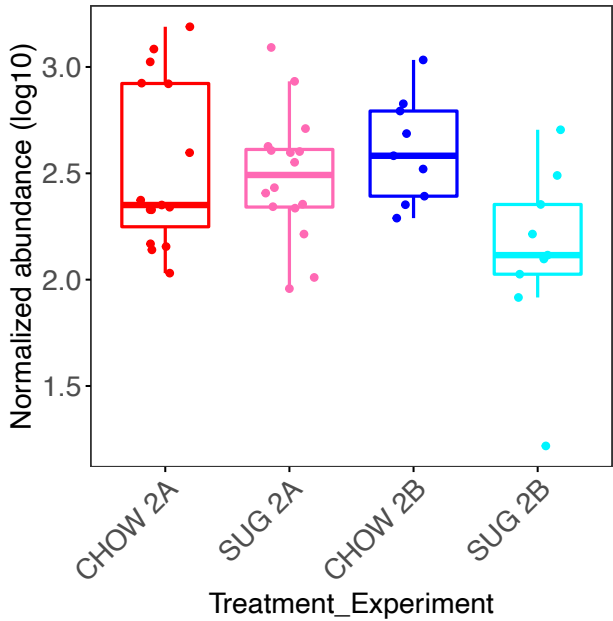

Proteobacteria.D.2\_\_Gammaproteobacteria.D.3\_\_Betaproteobacteriales.D.4\_\_Burkholderiaceae  
Experiment 2A FDR = 0.01017  
Experiment 2B FDR = 0.25551

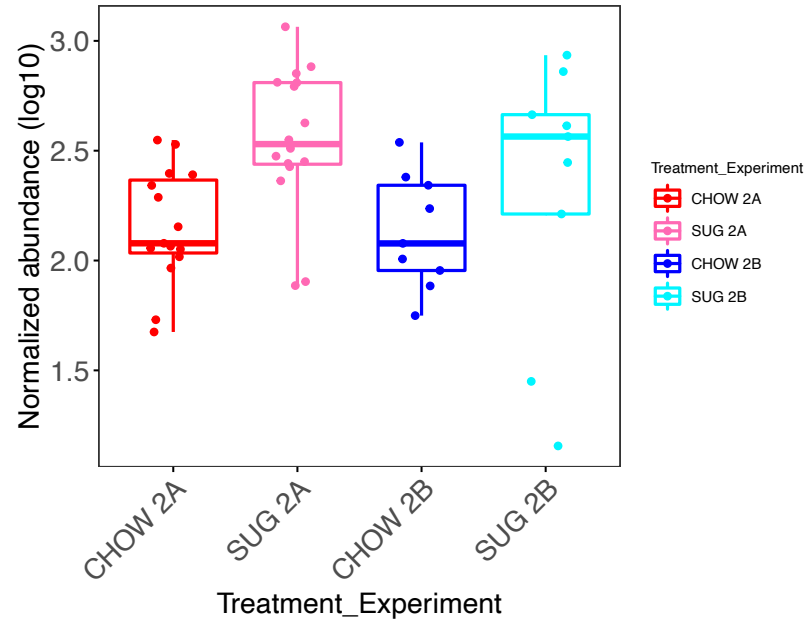

Bacteroidetes.D.2\_\_Bacteroidia...  
Experiment 2A FDR = 0.01017  
Experiment 2B FDR = 0.08816

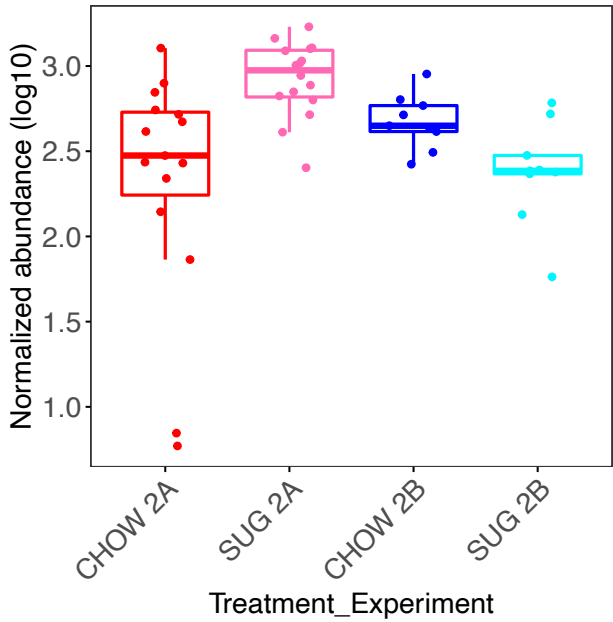

Bacteroidetes.D.2\_\_Bacteroidia.D.3\_\_Bacteroidales.D.4\_\_Tannerellaceae  
Experiment 2A FDR = 0.01017  
Experiment 2B FDR = 0.10564

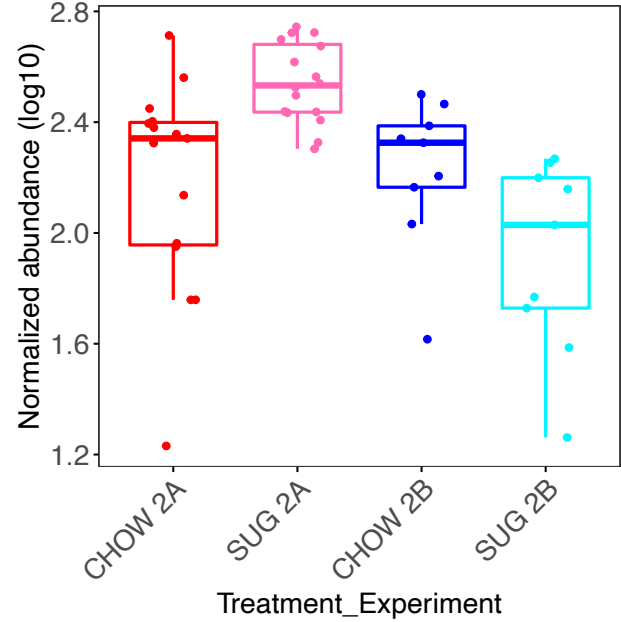

Actinobacteria.D.2\_\_Actinobacteria.D.3\_\_Bifidobacteriales.D.4\_\_Bifidobacteriaceae  
Experiment 2A FDR = 0.01017  
Experiment 2B FDR = 0.00464

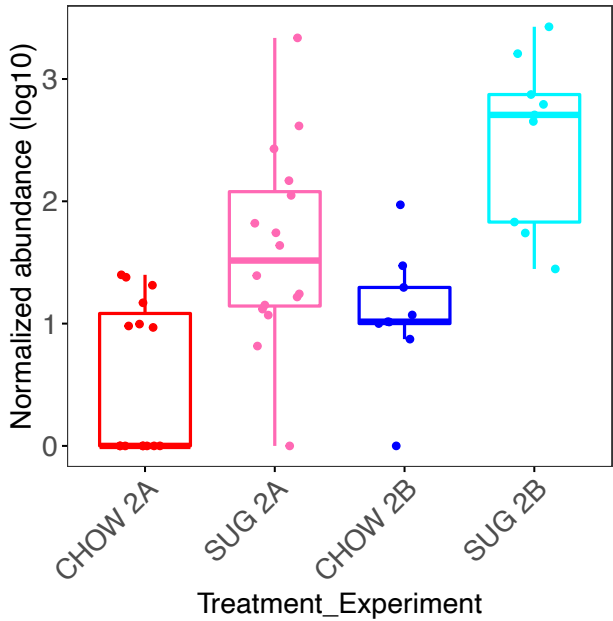

Proteobacteria.D.2\_\_Deltaproteobacteria.D.3\_\_Desulfufovibrionales.D.4\_\_Desulfufovibrionaceae  
Experiment 2A FDR = 0.06838  
Experiment 2B FDR = 0.79617

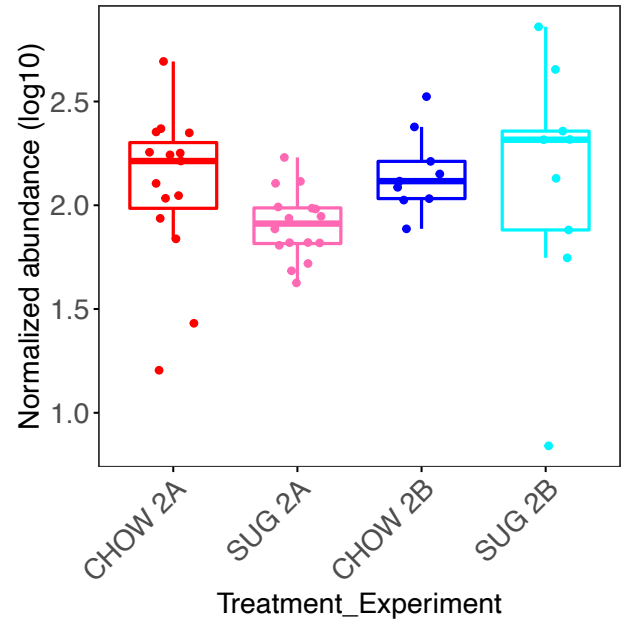

Actinobacteria.D.2\_\_Coriobacteria.D.3\_\_Coriobacteriales.D.4\_\_Atopobiaceae  
Experiment 2A FDR = 0.01017  
Experiment 2B FDR = 0.00456

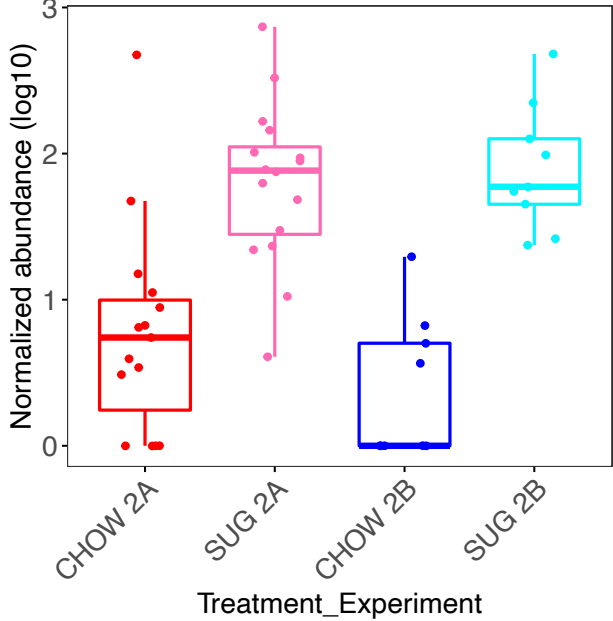

Proteobacteria.D.2\_\_Gammaproteobacteria.D.3\_\_Betaproteobacteriales...  
Experiment 2A FDR = 0.14984  
Experiment 2B FDR = 0.00456

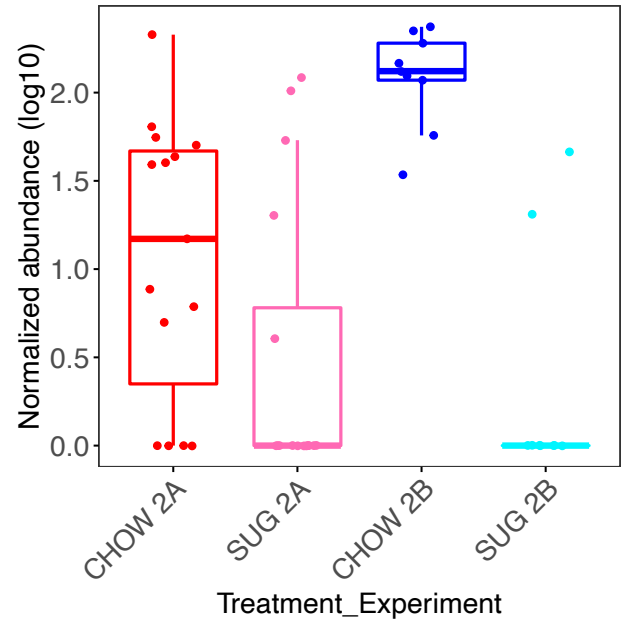

Firmicutes.D.2\_\_Clostridia.D.3\_\_Clostridiales.D.4\_\_Clostridiaceae 1  
Experiment 2A FDR = 0.06132  
Experiment 2B FDR = 0.03982

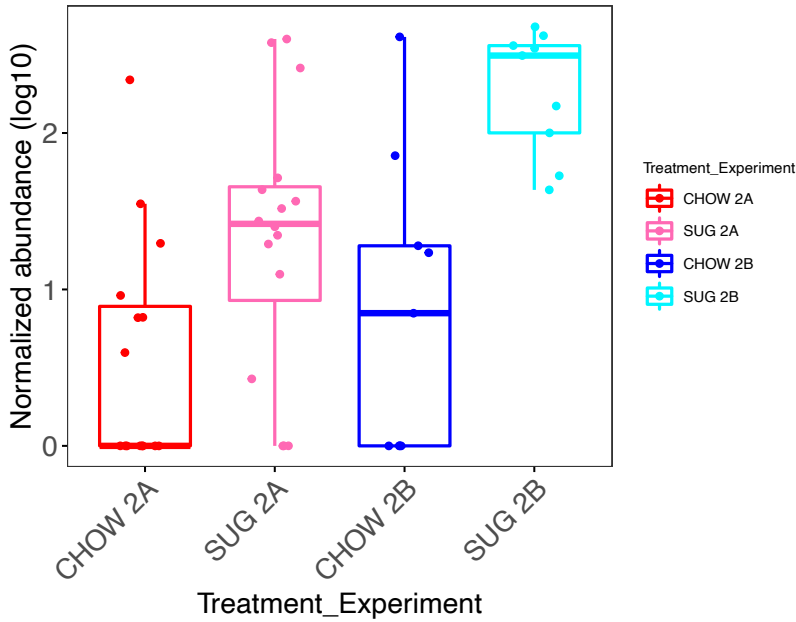

Actinobacteria.D.2\_\_Coriobacteria.D.3\_\_Coriobacteriales.D.4\_\_uncultured  
Experiment 2A FDR = 0.09419  
Experiment 2B FDR = 0.21018

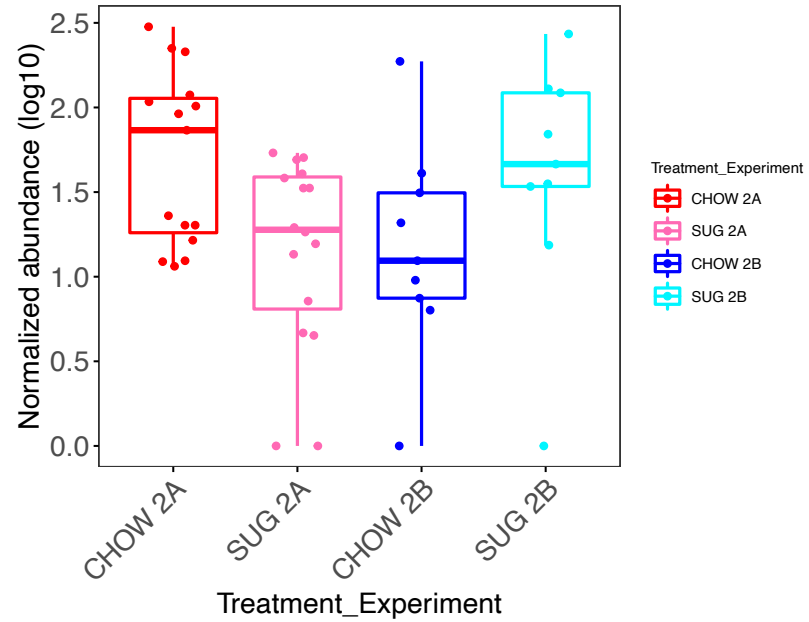

Firmicutes.D.2\_\_Clostridia.D.3\_\_Clostridiales.D.4\_\_Defluviitaleaceae  
Experiment 2A FDR = 0.06838  
Experiment 2B FDR = 0.33722

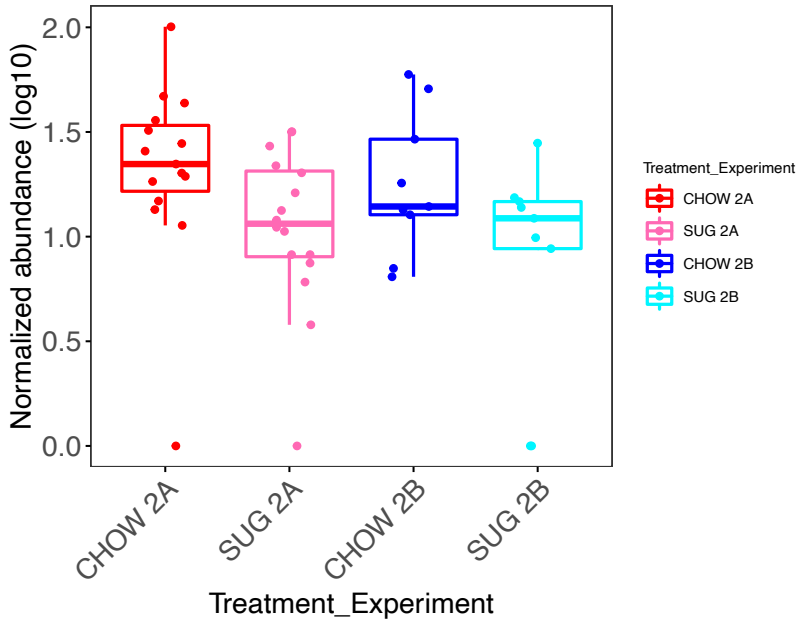

Bacteroidetes.D.2\_\_Bacteroidia.D.3\_\_Flavobacteriales.D.4\_\_Flavobacteriaceae  
Experiment 2A FDR = 0.02166  
Experiment 2B FDR = 0.74777

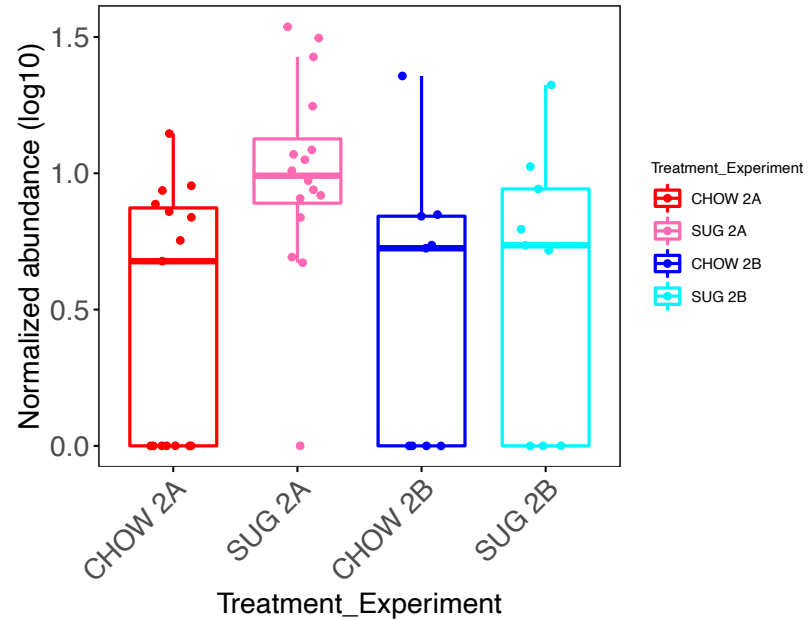

Proteobacteria.D.2\_\_Alphaproteobacteria.....  
Experiment 2A FDR = 0.02166  
Experiment 2B FDR = 0.25551

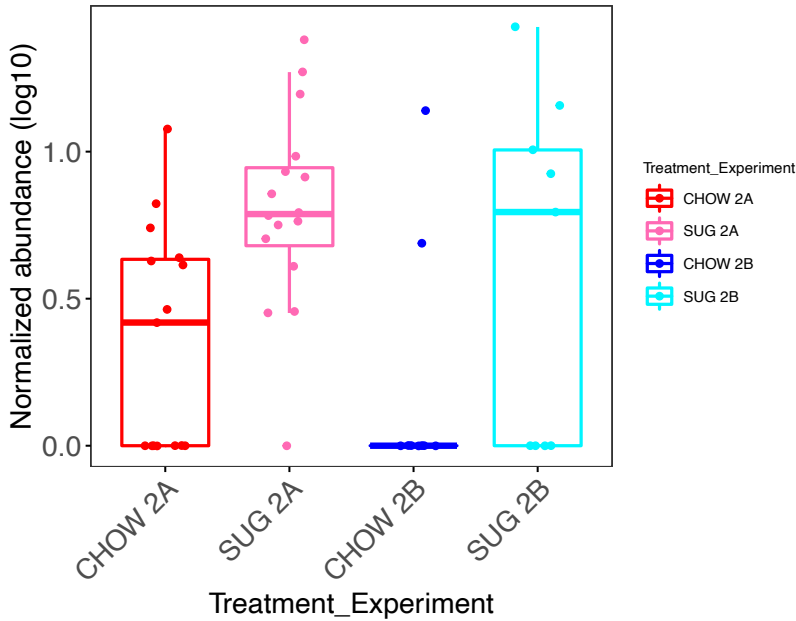

Bacteroidetes.D.2\_\_Bacteroidia.D.3\_\_Bacteroidales.D.4\_\_Muribaculaceae.....  
Experiment 2A FDR = 0.64741  
Experiment 2B FDR = 0.03057

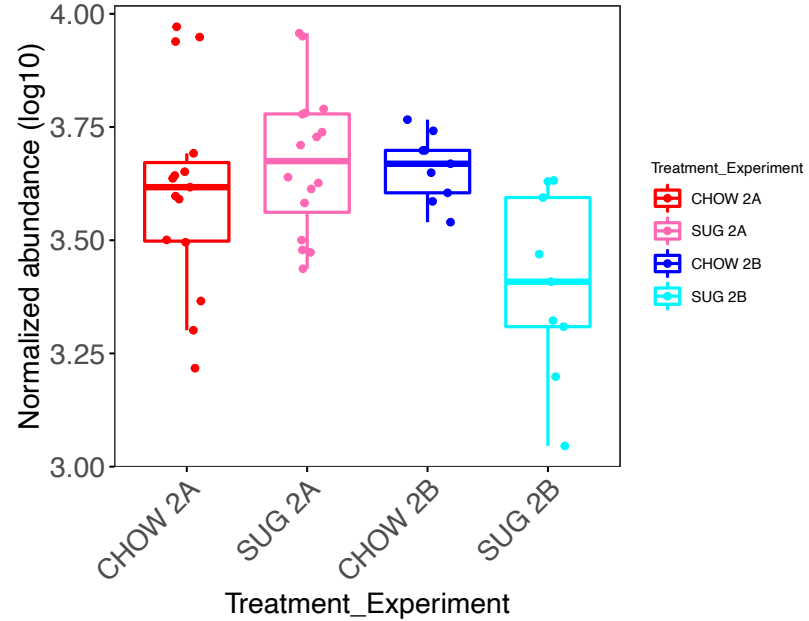



Firmicutes.D.2\_\_Erysipelotrichia.D.3\_\_Erysipelotrichales.D.4\_\_Erysipelotrichaceae.D.5\_\_Allobaculum  
Experiment 2A FDR = 0.27157  
Experiment 2B FDR = 0.03057

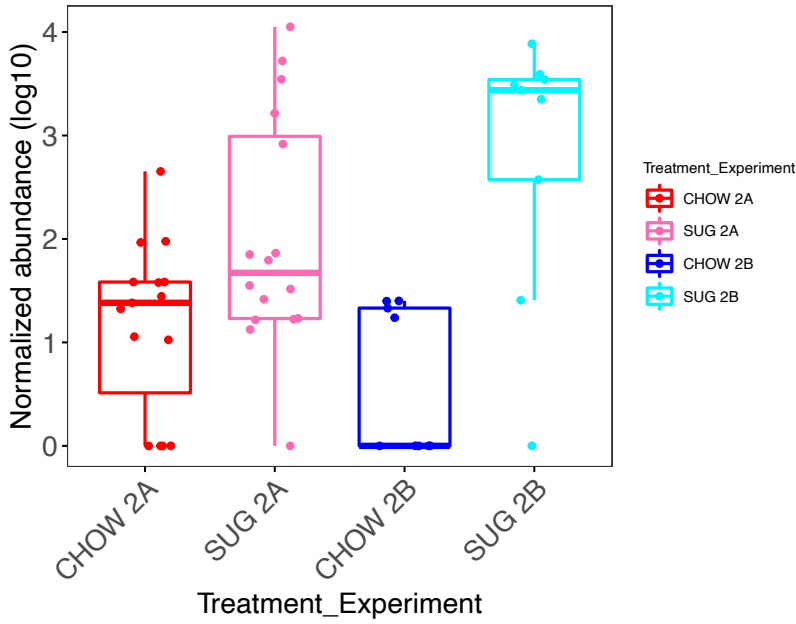

Bacteroidetes.D.2\_\_Bacteroidia.D.3\_\_Bacteroidales.D.4\_\_Bacteroidaceae.D.5\_\_Bacteroides  
Experiment 2A FDR = 0.09972  
Experiment 2B FDR = 0.11868

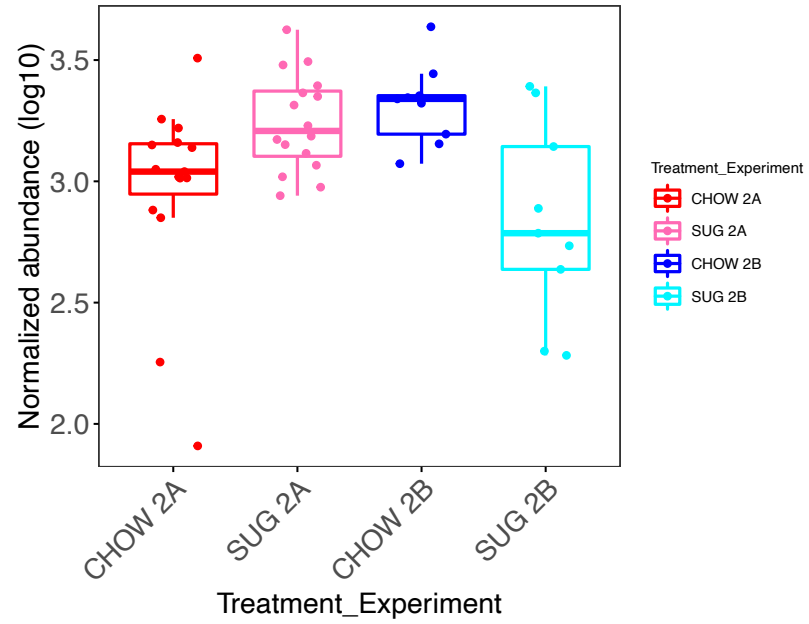

Firmicutes.D.2\_\_Clostridia.D.3\_\_Clostridiales.D.4\_\_Ruminococcaceae.D.5\_\_[Eubacterium] coprostanoligenes group  
Experiment 2A FDR = 0.0139  
Experiment 2B FDR = 0.8203

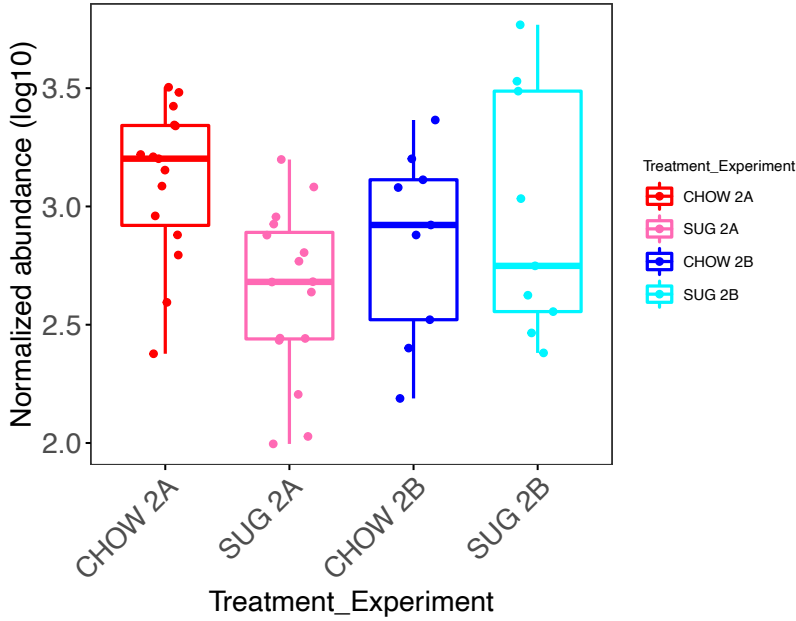

Bacteroidetes.D.2\_\_Bacteroidia.D.3\_\_Bacteroidales.D.4\_\_Prevotellaceae.D.5\_\_Prevotella 9  
Experiment 2A FDR = 0.06257  
Experiment 2B FDR = 0.71239

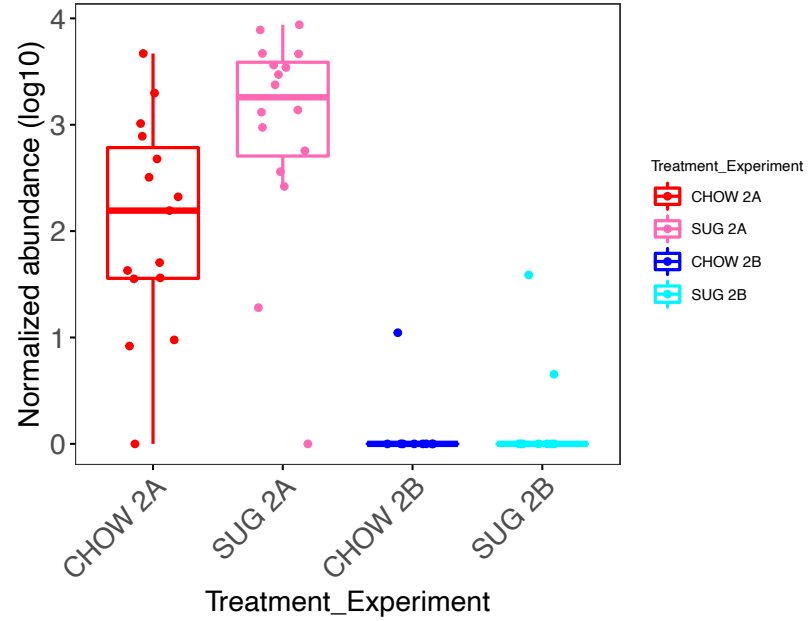

Firmicutes.D.2\_\_Clostridia.D.3\_\_Clostridiales.....  
Experiment 2A FDR = 0.8986  
Experiment 2B FDR = 0.06608

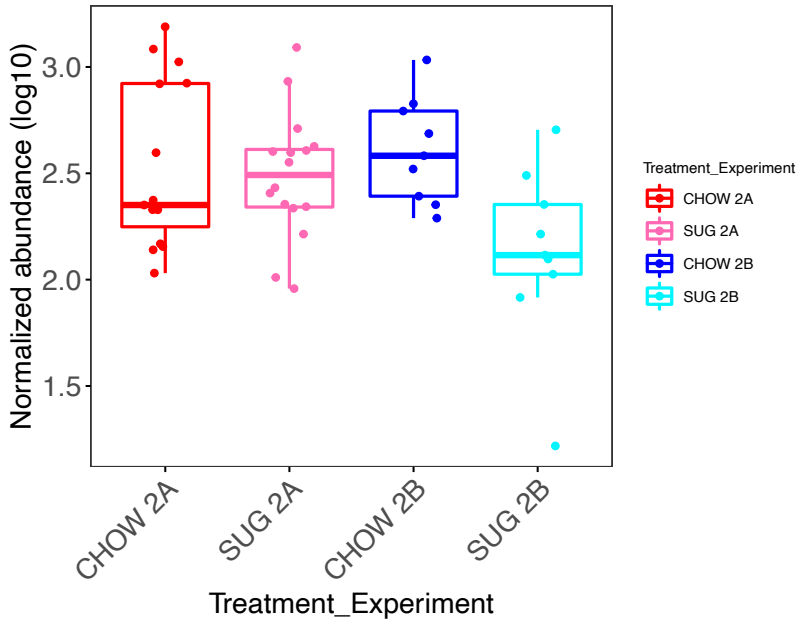

Firmicutes.D.2\_\_Clostridia.D.3\_\_Clostridiales.D.4\_\_Ruminococcaceae.D.5\_\_Ruminiclostridium 5  
Experiment 2A FDR = 0.01804  
Experiment 2B FDR = 0.7232

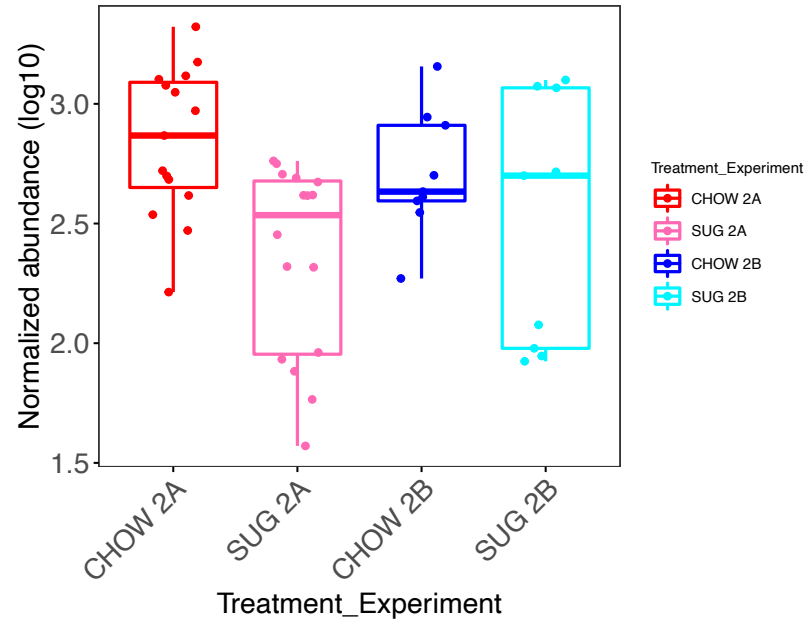

Proteobacteria.D.2\_Gammaproteobacteria.D.3\_Betaproteobacteriales.D.4\_Burkholderiaceae.D.5\_Parasutterella  
Experiment 2A FDR = 0.0139  
Experiment 2B FDR = 0.29683

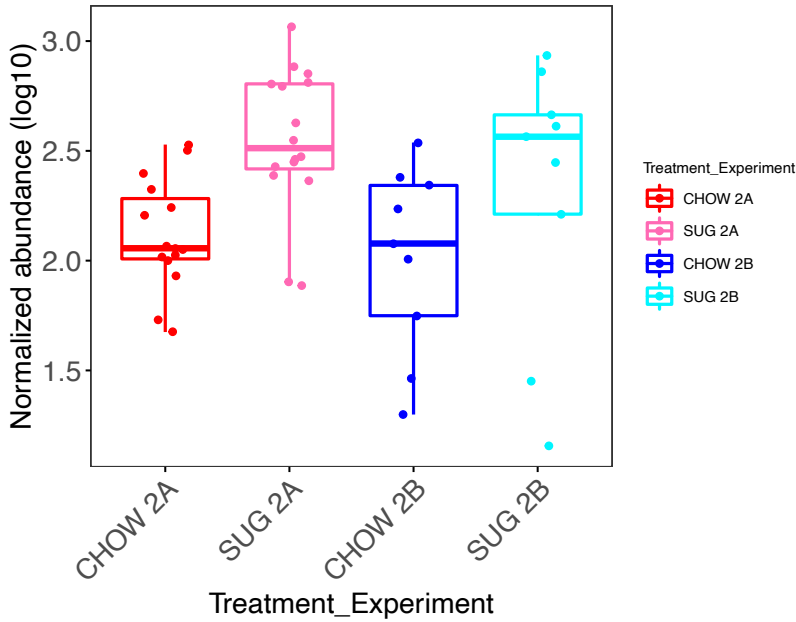

Bacteroidetes.D.2\_Bacteroidia.D.3\_Bacteroidales.D.4\_Bacteroidales.D.5\_Muribaculaceae.D.5\_uncultured bacterium  
Experiment 2A FDR = 0.48648  
Experiment 2B FDR = 0.02895

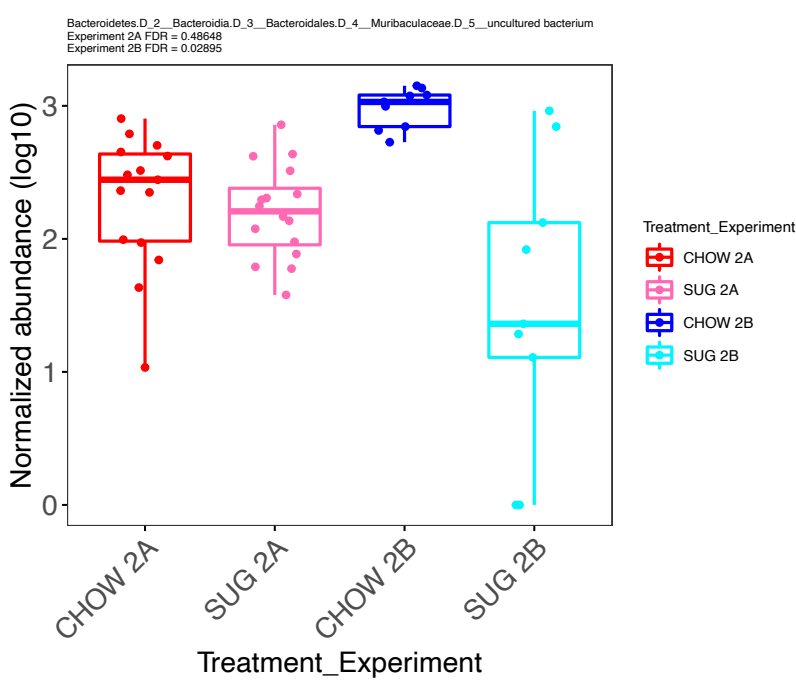

Bacteroidetes.D.2\_Bacteroidia.D.3\_Bacteroidales.D.4\_Tannerellaceae.D.5\_Parabacteroides  
Experiment 2A FDR = 0.0139  
Experiment 2B FDR = 0.13374

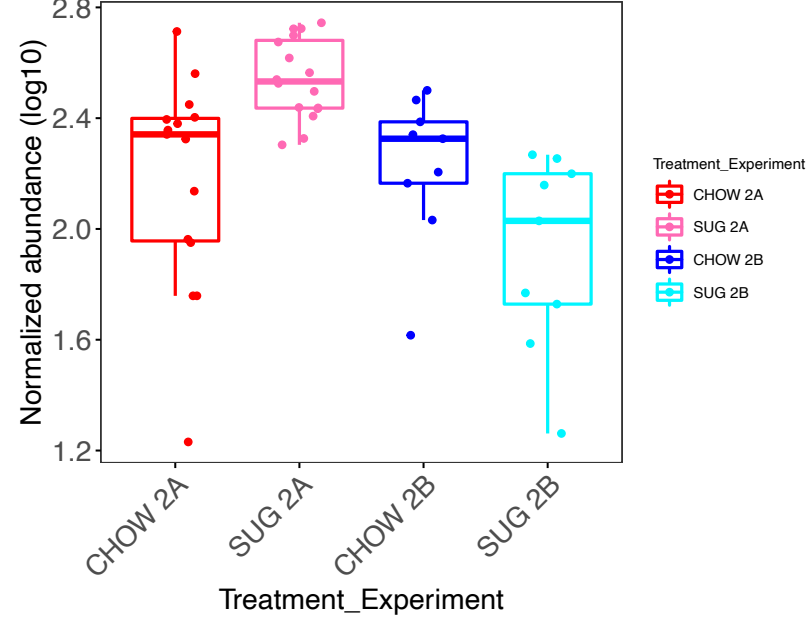

Actinobacteria.D.2\_Actinobacteria.D.3\_Bifidobacteriales.D.4\_Bifidobacteriaceae.D.5\_Bifidobacterium  
Experiment 2A FDR = 0.0139  
Experiment 2B FDR = 0.01007

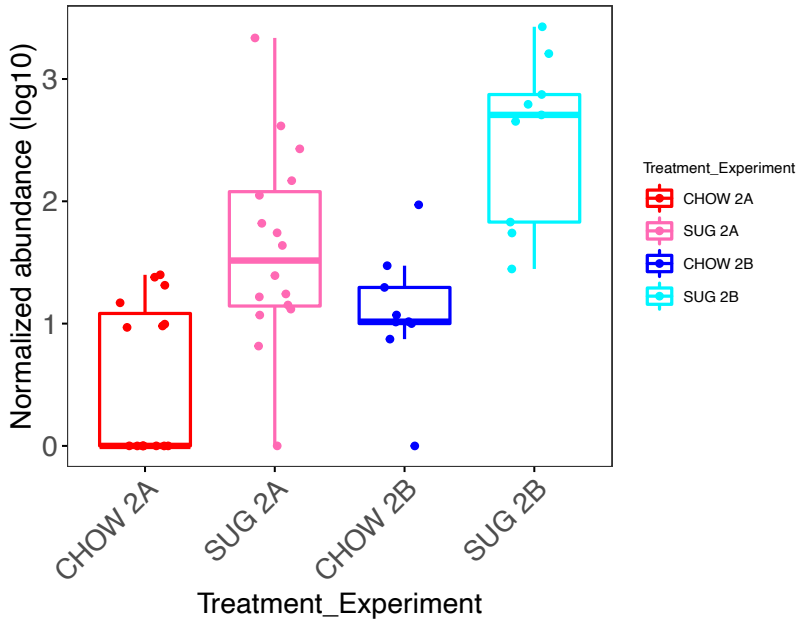

Bacteroidetes.D.2\_Bacteroidia.D.3\_Bacteroidales.D.4\_Muribaculaceae.D.5\_uncultured Bacteroidales bacterium  
Experiment 2A FDR = 0.81621  
Experiment 2B FDR = 0.0042

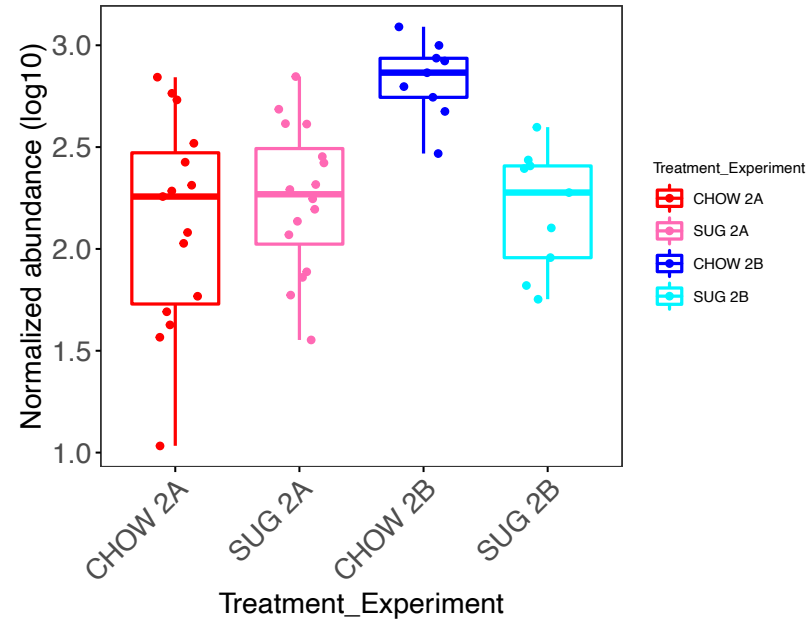

Bacteroidetes.D.2\_Bacteroidia.D.3\_Bacteroidales.D.4\_Prevotellaceae.D.5\_Prevotellaceae UCG-001  
Experiment 2A FDR = 0.79946  
Experiment 2B FDR = 0.01329

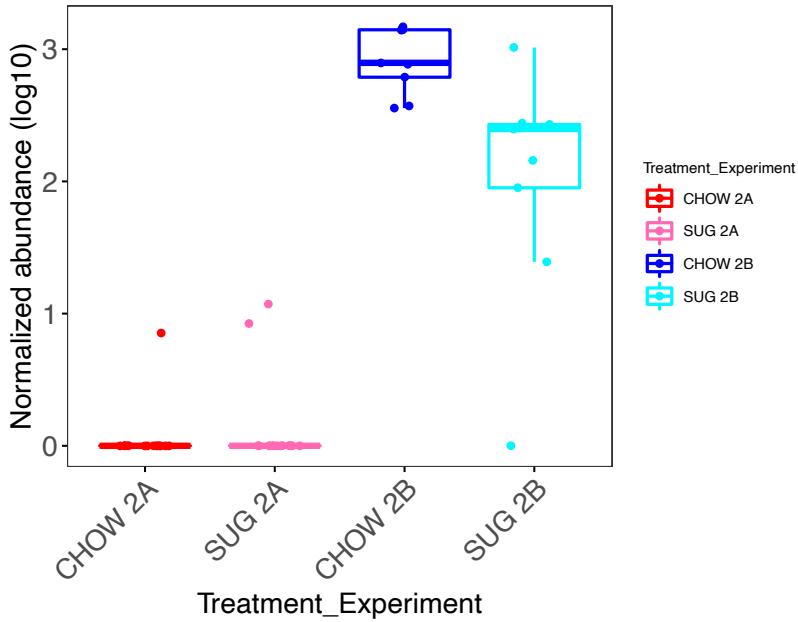

Firmicutes.D.2\_Erysipelotrichia.D.3\_Erysipelotrichales.D.4\_Erysipelotrichaceae.D.5\_Faecalibaculum  
Experiment 2A FDR = 0.23238  
Experiment 2B FDR = 0.0042

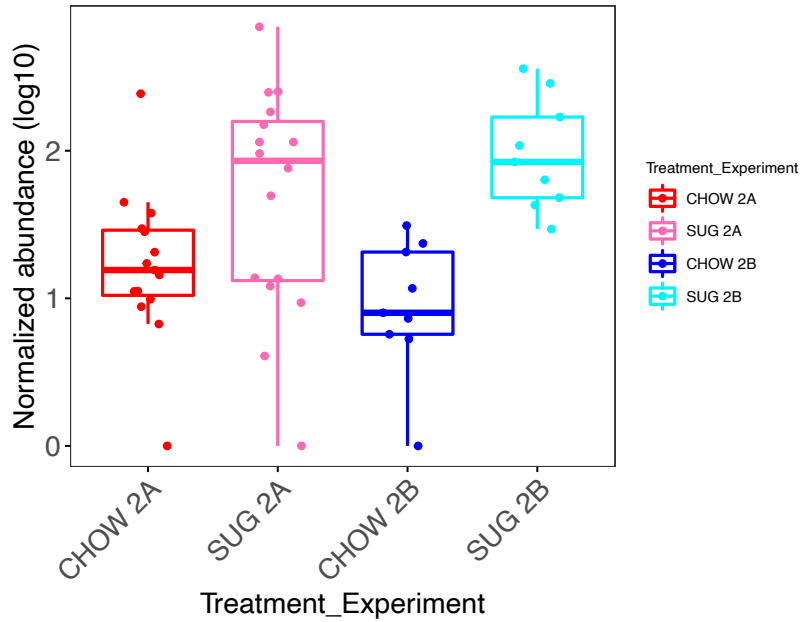

Firmicutes.D.2\_Erysipelotrichia.D.3\_Erysipelotrichales.D.4\_Erysipelotrichaceae.D.5\_Dubosiella  
Experiment 2A FDR = 0.0524  
Experiment 2B FDR = 0.06158

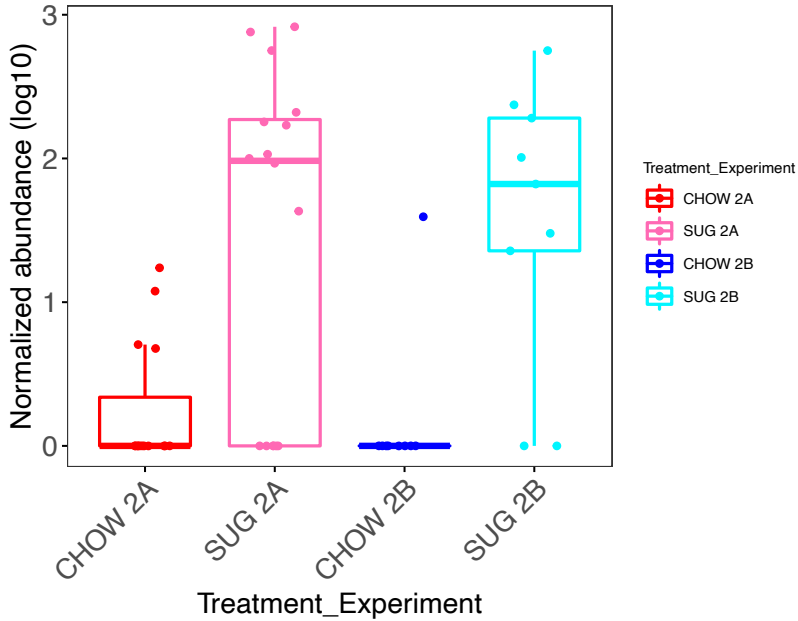

Actinobacteria.D.2\_Coriorbacteria.D.3\_Coriorbacteriales.D.4\_Attopiaceae.D.5\_Coriorbacteriaceae UCG-002  
Experiment 2A FDR = 0.0139  
Experiment 2B FDR = 0.0099

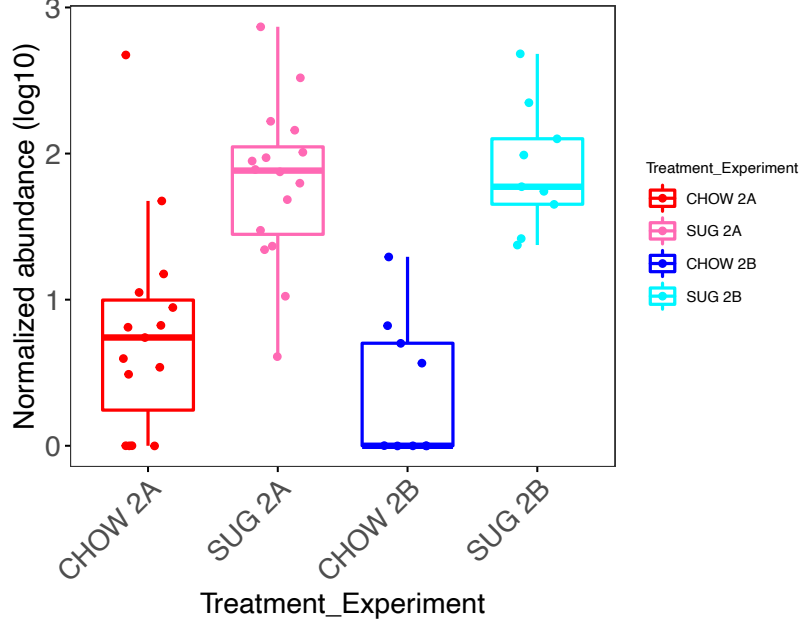

Proteobacteria.D.2\_Gammaproteobacteria.D.3\_Betaproteobacteriales.....  
Experiment 2A FDR = 0.21071  
Experiment 2B FDR = 0.0099

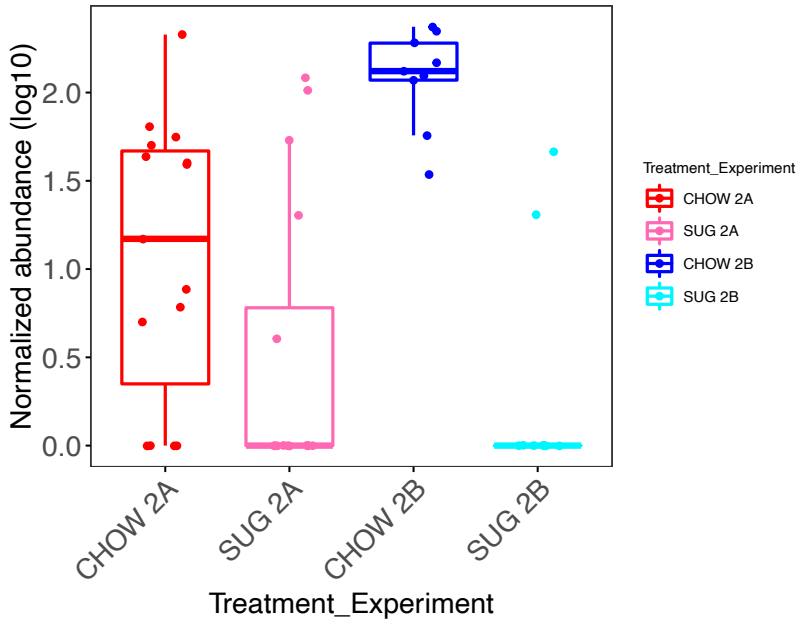

Bacteroidetes.D.2\_Bacteroidia.D.3\_Bacteroidales.D.4\_Muribaculaceae.D.5\_Muribaculum  
Experiment 2A FDR = 0.8886  
Experiment 2B FDR = 0.08893

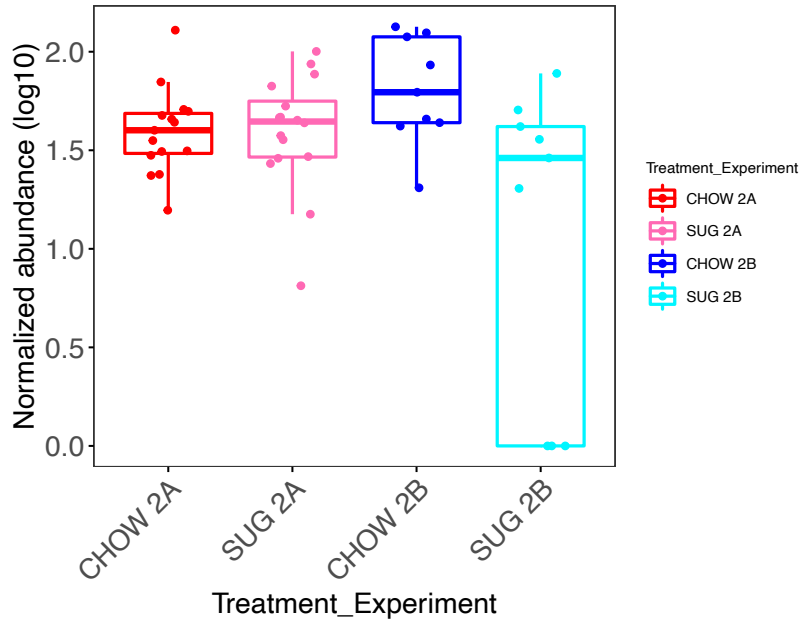

Firmicutes.D.2\_\_Clostridia.D.3\_\_Clostridiales.D.4\_\_Clostridiaceae.1.D.5\_\_Clostridium sensu stricto 1  
Experiment 2A FDR = 0.16777  
Experiment 2B FDR = 0.03057

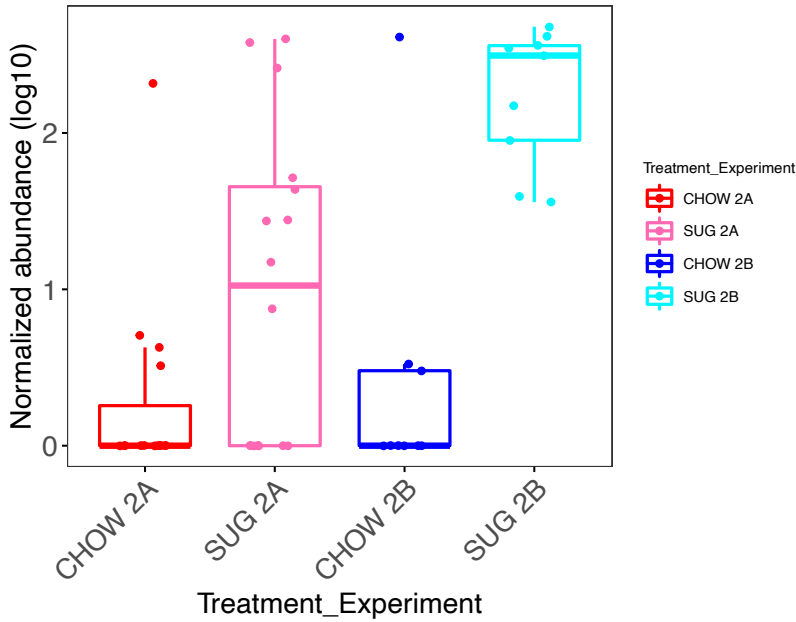

Firmicutes.D.2\_\_Erysipelotrichia.D.3\_\_Erysipelotrichales.D.4\_\_Erysipelotrichaceae.D.5\_\_Erysipelatoclostridium  
Experiment 2A FDR = 0.93378  
Experiment 2B FDR = 0.08893

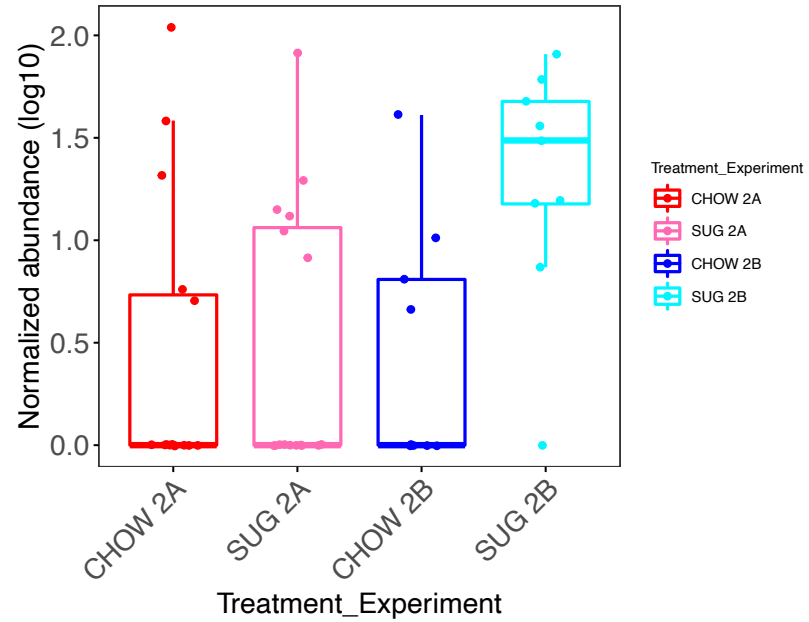

Firmicutes.D.2\_\_Bacilli.D.3\_\_Lactobacillales.D.4\_\_Streptococcaceae.D.5\_\_Lactococcus  
Experiment 2A FDR = 0.0139  
Experiment 2B FDR = 0.46016

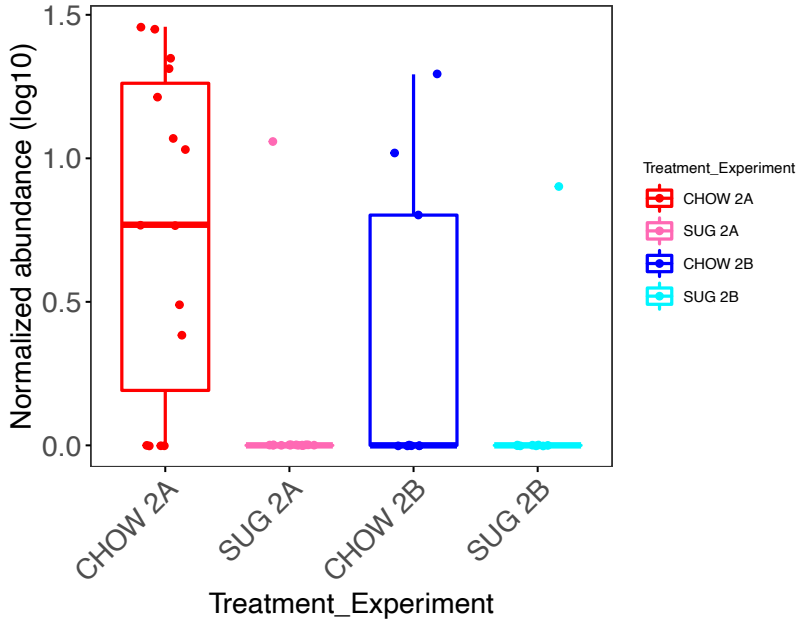

Firmicutes.D.2\_\_Clostridia.D.3\_\_Clostridiales.D.4\_\_Lachnospiraceae.D.5\_\_[Ruminococcus] gnavus group  
Experiment 2A FDR = 0.0139  
Experiment 2B FDR = 0.29683

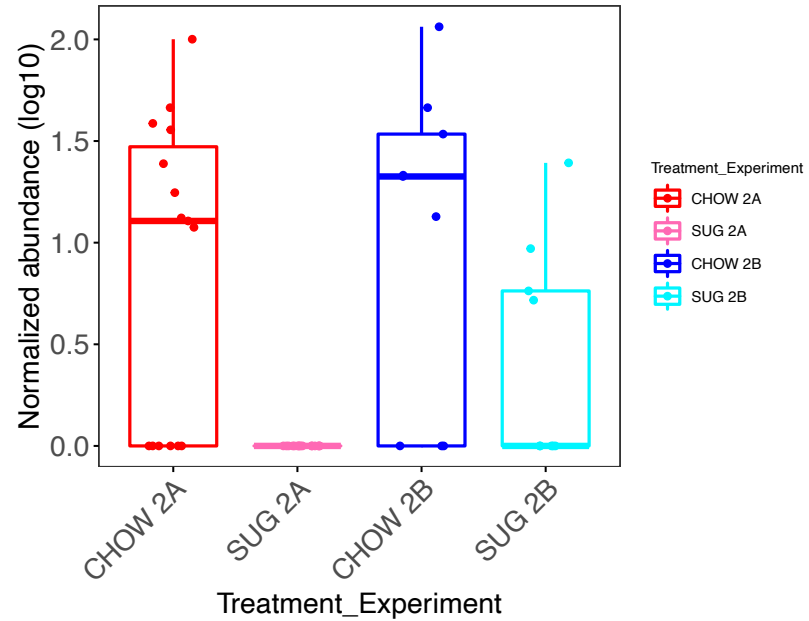

Firmicutes.D.2\_\_Erysipelotrichia.D.3\_\_Erysipelotrichales.D.4\_\_Erysipelotrichaceae\_\_\_\_  
Experiment 2A FDR = 0.0524  
Experiment 2B FDR = 1

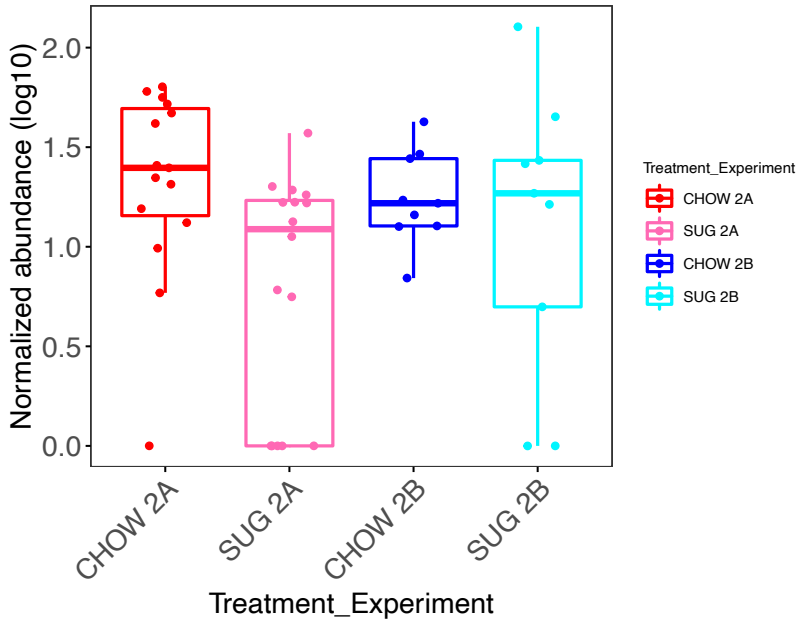

Firmicutes.D.2\_\_Clostridia.D.3\_\_Clostridiales.D.4\_\_Deffluviitaleaceae.D.5\_\_Deffluviitaleaceae UCG-011  
Experiment 2A FDR = 0.09819  
Experiment 2B FDR = 0.40512

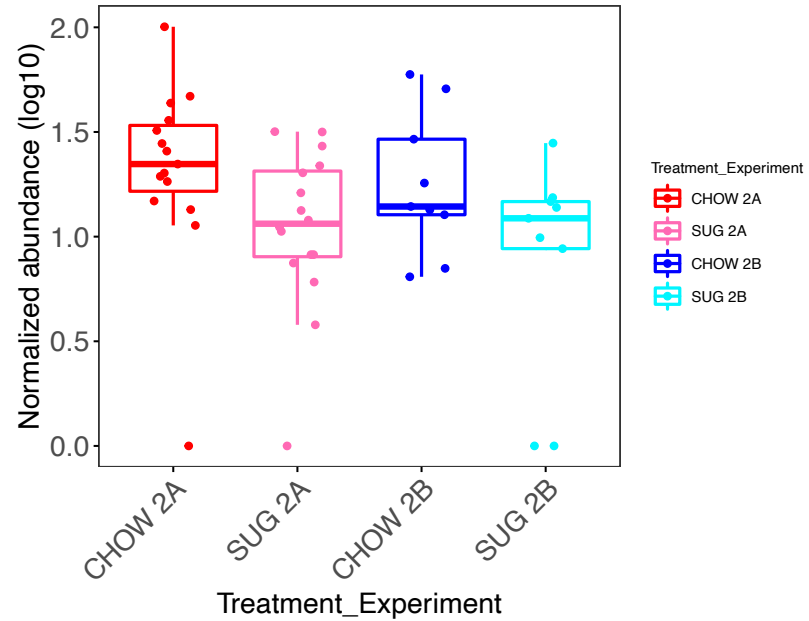

Firmicutes.D.2\_\_Clostridia.D.3\_\_Clostridiales.D.4\_\_Ruminococcaceae.D.5\_\_Intestinimonas  
Experiment 2A FDR = 0.33519  
Experiment 2B FDR = 0.08893

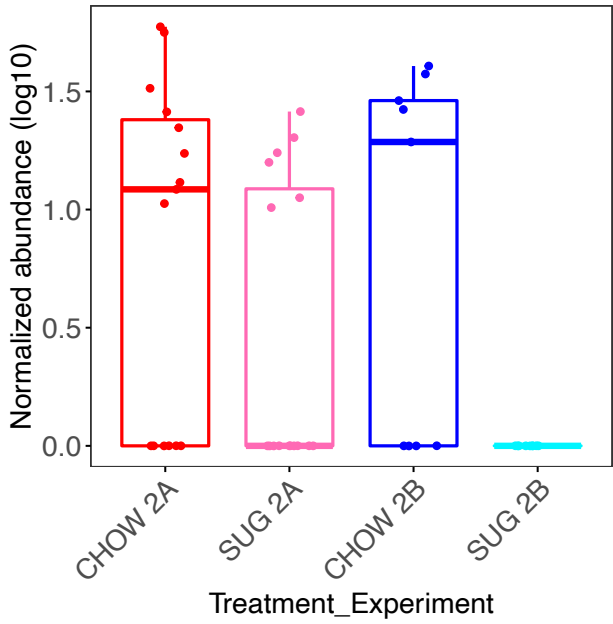

Firmicutes.D.2\_\_Clostridia.D.3\_\_Clostridiales.D.4\_\_Lachnospiraceae.D.5\_\_Lachnospiraceae.FCS020.group  
Experiment 2A FDR = 0.01531  
Experiment 2B FDR = 0.30137

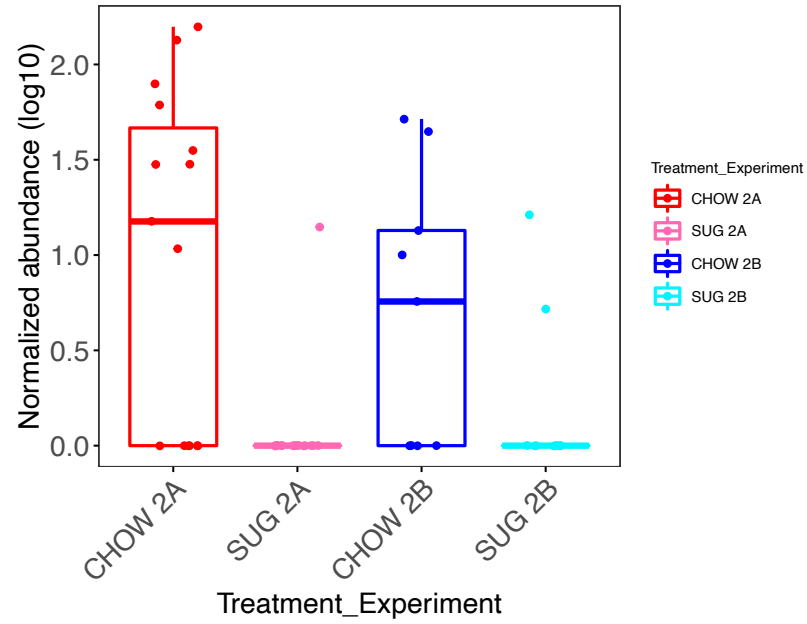

Firmicutes.D.2\_\_Clostridia.D.3\_\_Clostridiales.D.4\_\_Lachnospiraceae.D.5\_\_A2  
Experiment 2A FDR = 0.15547  
Experiment 2B FDR = 0.08893

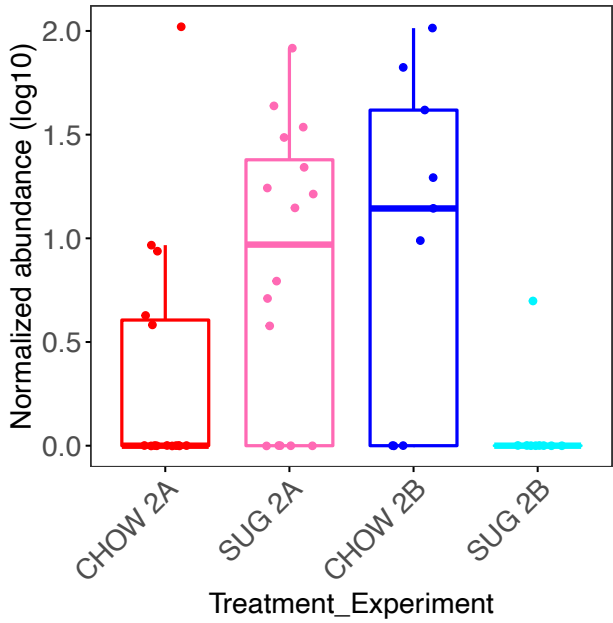

Firmicutes.D.2\_\_Clostridia.D.3\_\_Clostridiales.D.4\_\_Lachnospiraceae.D.5\_\_ASF356  
Experiment 2A FDR = 0.06257  
Experiment 2B FDR = 0.65201

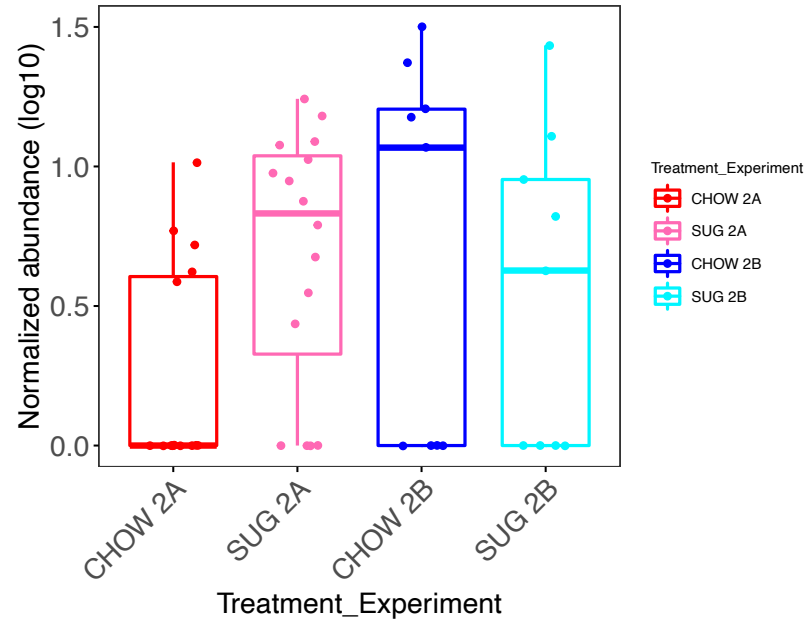

Bacteroidetes.D.2\_\_Bacteroidia.D.3\_\_Flavobacteriales.D.4\_\_Flavobacteriaceae.D.5\_\_uncultured  
Experiment 2A FDR = 0.03031  
Experiment 2B FDR = 0.76069

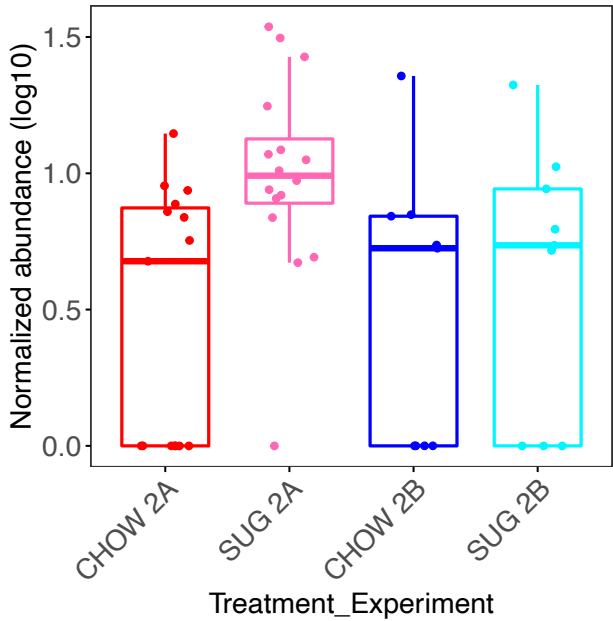

Proteobacteria.D.2\_\_Alphaproteobacteria.....  
Experiment 2A FDR = 0.03159  
Experiment 2B FDR = 0.30137

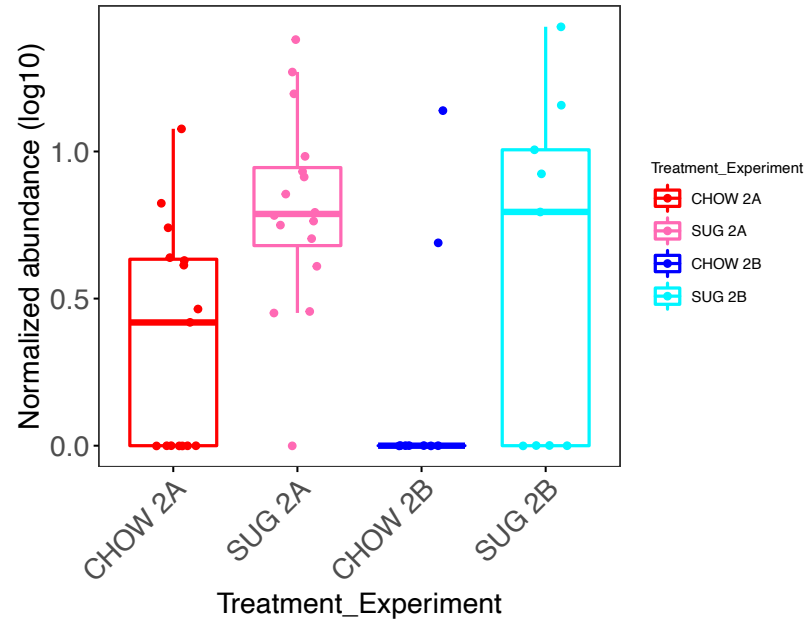

Bacteroidetes.D.2\_\_Bacteroidia.D.3\_\_Bacteroidales.D.4\_\_Muribaculaceae\_\_\_\_\_

Experiment 2A FDR = 0.63414

Experiment 2B FDR = 0.03269

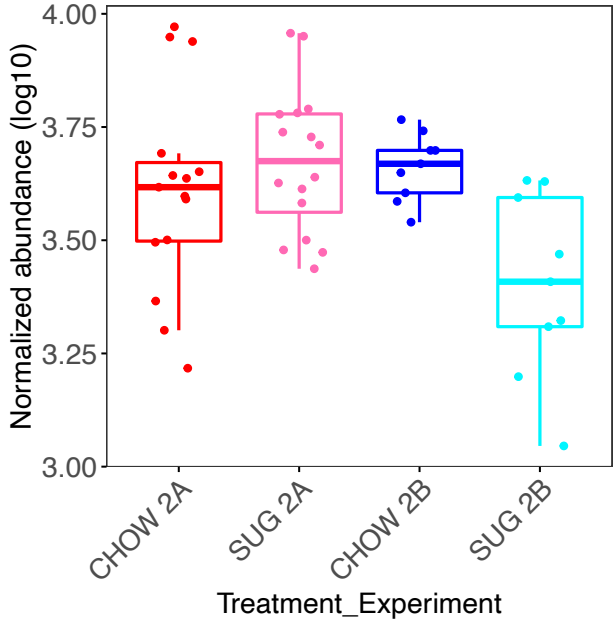

Firmicutes.D.2\_\_Erysipelotrichia.D.3\_\_Erysipelotrichales.D.4\_\_Erysipelotrichaceae.D.5\_\_Allobaculum.D.6\_\_uncultured bacterium

Experiment 2A FDR = 0.29063

Experiment 2B FDR = 0.03269

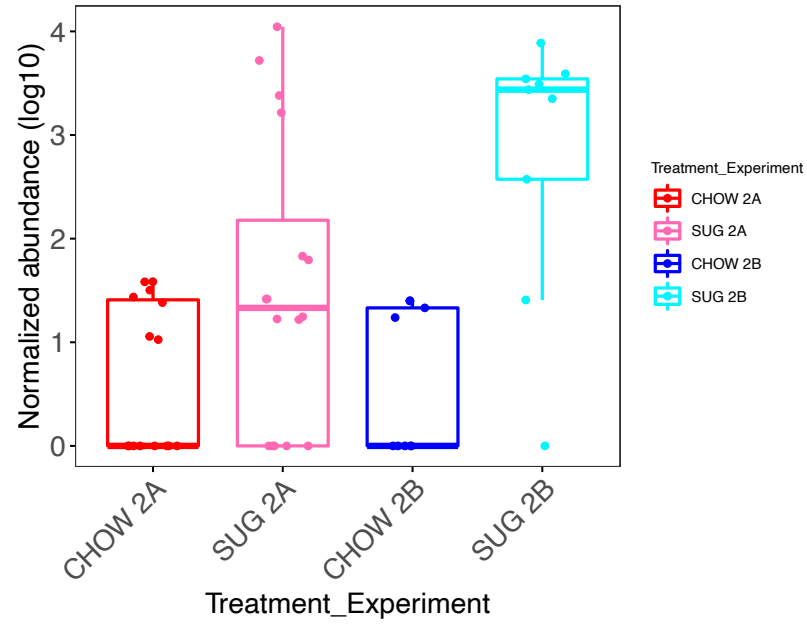

Bacteroidetes.D.2\_\_Bacteroidia.D.3\_\_Bacteroidales.D.4\_\_Prevotellaceae.D.5\_\_Prevotella.9\_\_\_\_\_

Experiment 2A FDR = 0.07564

Experiment 2B FDR = 0.71837

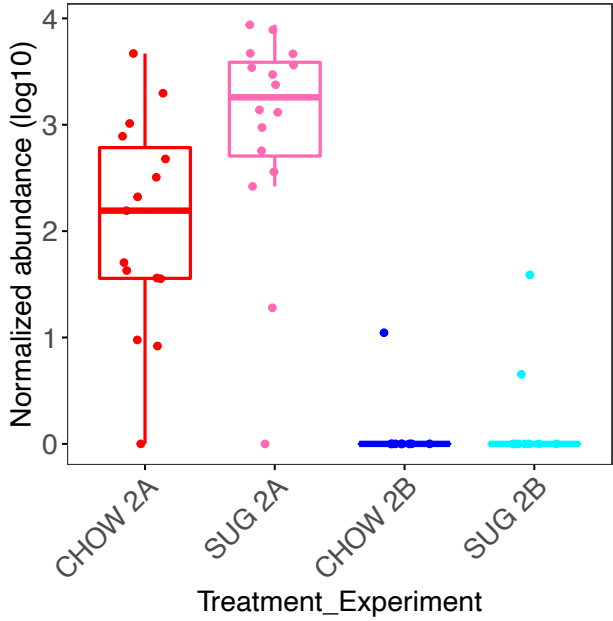

Firmicutes.D.2\_\_Clostridia.D.3\_\_Clostridiales\_\_\_\_\_

Experiment 2A FDR = 0.86891

Experiment 2B FDR = 0.07177

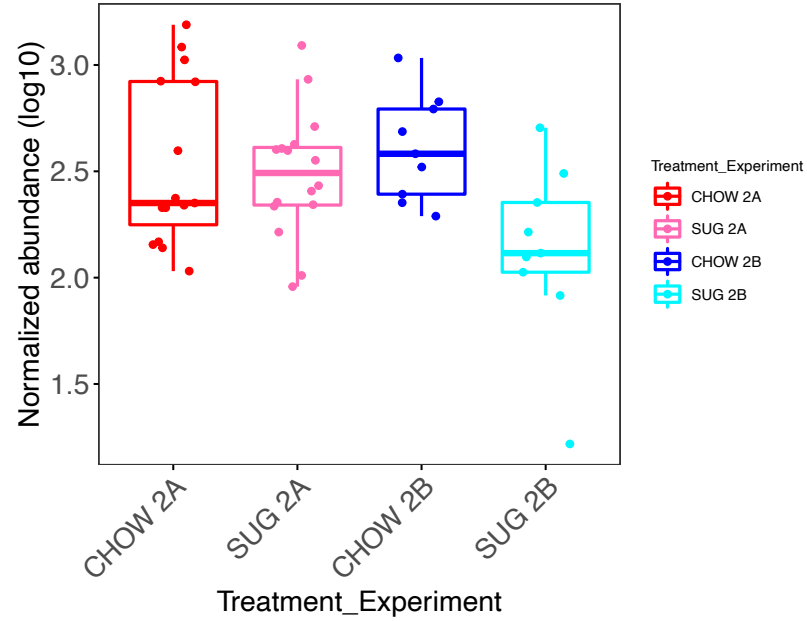

Firmicutes.D.2\_\_Clostridia.D.3\_\_Clostridiales.D.4\_\_Ruminococcaceae.D.5\_\_Ruminiclostridium.5\_\_\_\_\_

Experiment 2A FDR = 0.01471

Experiment 2B FDR = 0.79684

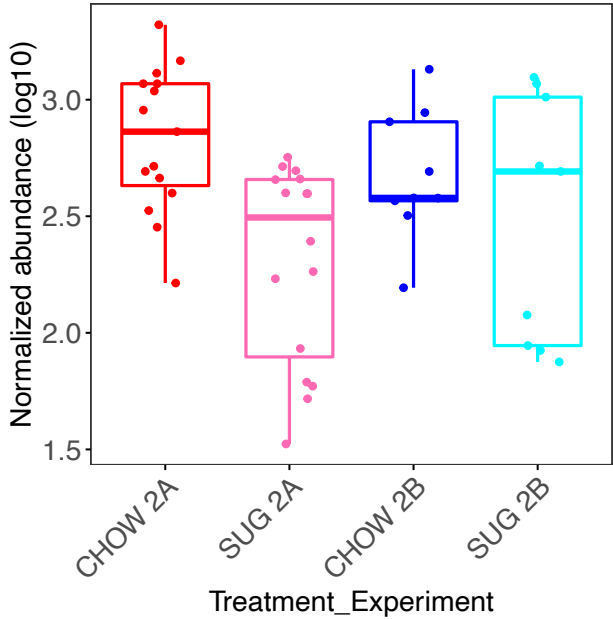

Proteobacteria.D.2\_\_Gammaproteobacteria.D.3\_\_Betaproteobacteriales.D.4\_\_Burkholderiaceae.D.5\_\_Parasutterella\_\_\_\_\_

Experiment 2A FDR = 0.0111

Experiment 2B FDR = 0.21491

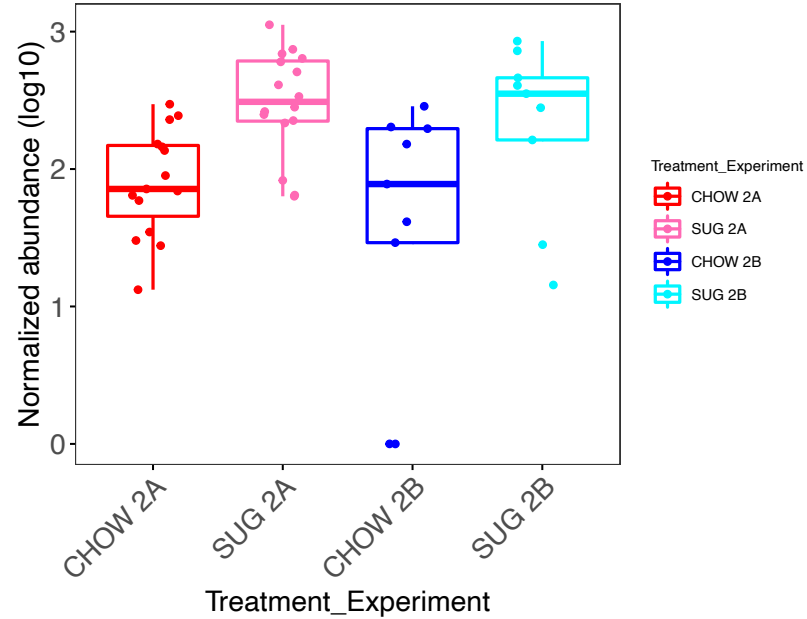

Bacteroidetes.D.2\_\_Bacteroidia.....  
Experiment 2A FDR = 0.01471  
Experiment 2B FDR = 0.11847

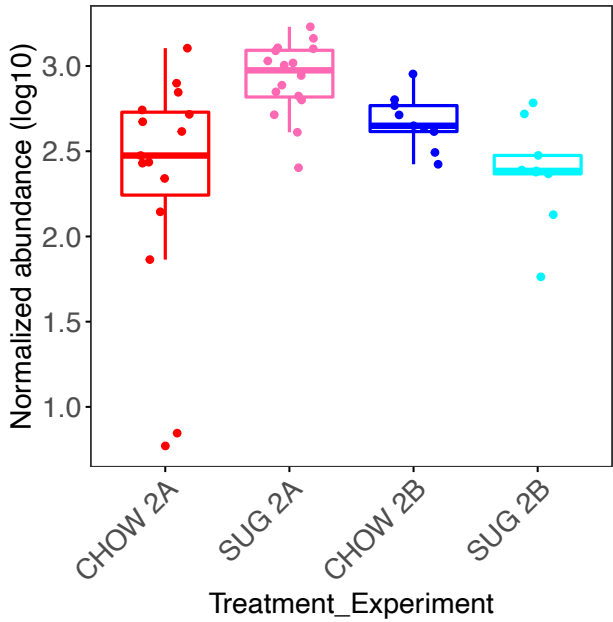

Bacteroidetes.D.2\_\_Bacteroidia.D.3\_\_Bacteroidales.D.4\_\_Muribaculaceae.D.5\_\_uncultured bacterium.D.6\_\_uncultured bacterium  
Experiment 2A FDR = 0.53244  
Experiment 2B FDR = 0.0298

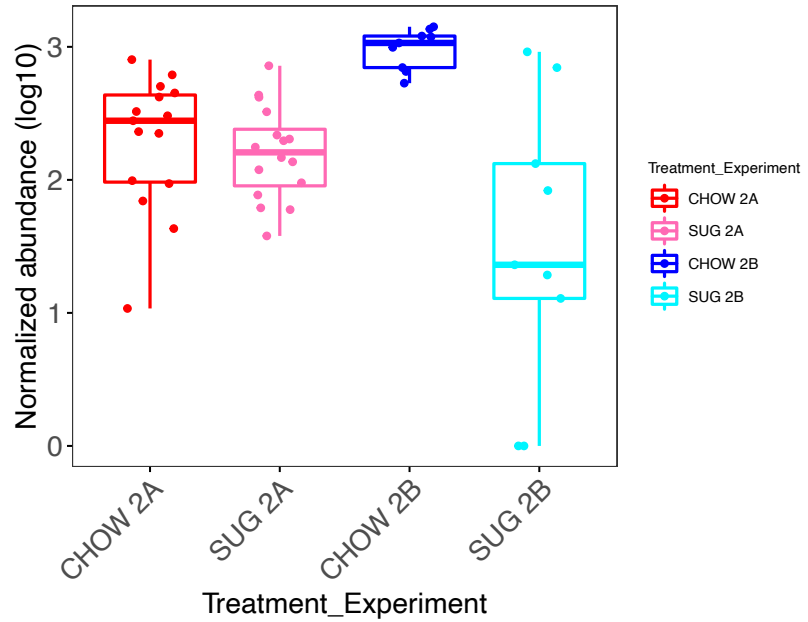

Bacteroidetes.D.2\_\_Bacteroidia.D.3\_\_Bacteroidales.D.4\_\_Tannerellaceae.D.5\_\_Parabacteroides.....  
Experiment 2A FDR = 0.01471  
Experiment 2B FDR = 0.15734

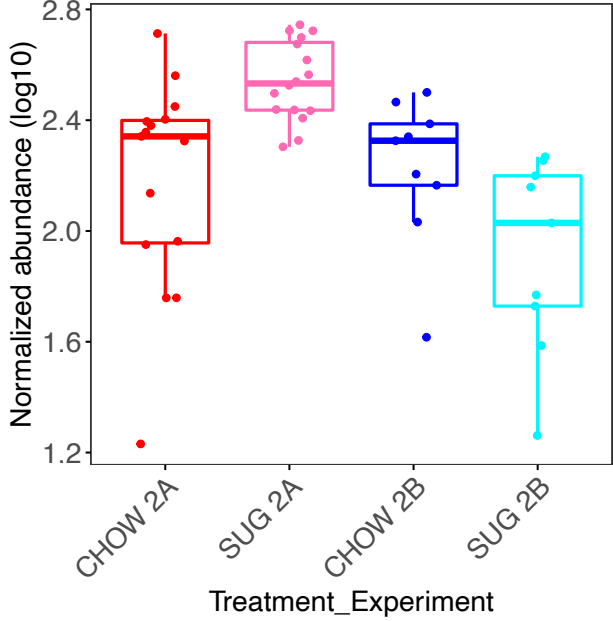

Actinobacteria.D.2\_\_Actinobacteria.D.3\_\_Bifidobacteriales.D.4\_\_Bifidobacteriaceae.D.5\_\_Bifidobacterium.....  
Experiment 2A FDR = 0.01471  
Experiment 2B FDR = 0.01185

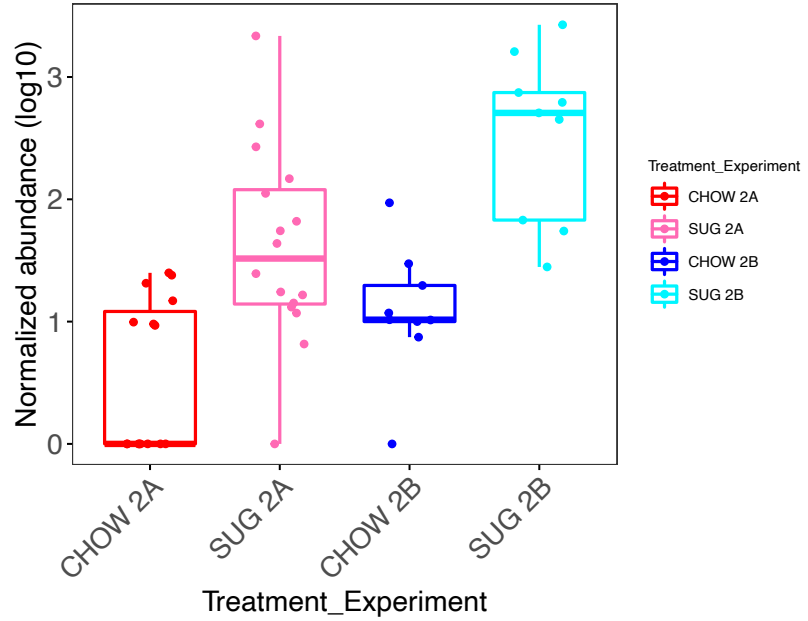

Bacteroidetes.D.2\_\_Bacteroidia.D.3\_\_Bacteroidales.D.4\_\_Muribaculaceae.D.5\_\_uncultured Bacteroidales bacterium.D.6\_\_uncultured Bacter  
Experiment 2A FDR = 0.73585  
Experiment 2B FDR = 0.00494

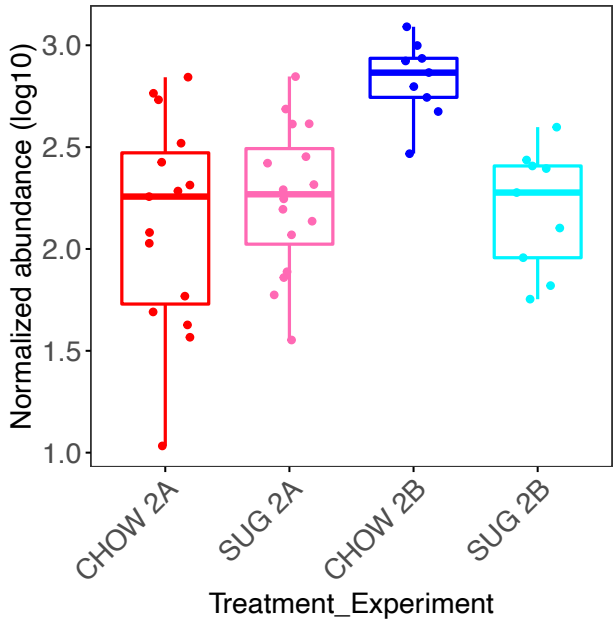

Bacteroidetes.D.2\_\_Bacteroidia.D.3\_\_Bacteroidales.D.4\_\_Prevotellaceae.D.5\_\_Prevotellaceae UCG-001.....  
Experiment 2A FDR = 0.78255  
Experiment 2B FDR = 0.01563

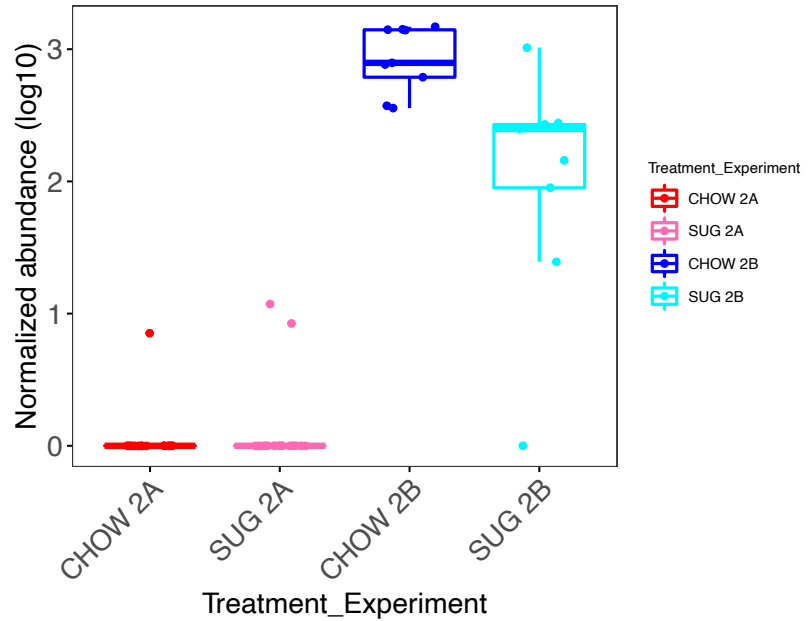

Firmicutes.D.2\_\_Erysipelotrichia.D.3\_\_Erysipelotrichales.D.4\_\_Erysipelotrichaceae.D.5\_\_Faecalibaculum.D.6\_\_uncultured bacterium  
 Experiment 2A FDR = 0.26876  
 Experiment 2B FDR = 0.00494

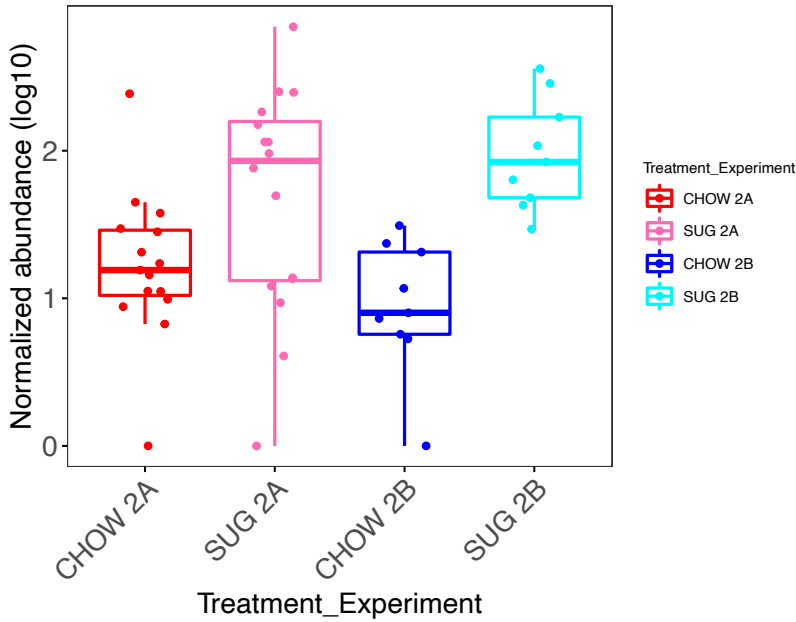

Firmicutes.D.2\_\_Clostridia.D.3\_\_Clostridiales.D.4\_\_Ruminococcaceae.D.5\_\_Ruminococcaceae UCG-005\_\_  
 Experiment 2A FDR = 0.69071  
 Experiment 2B FDR = 0.09847

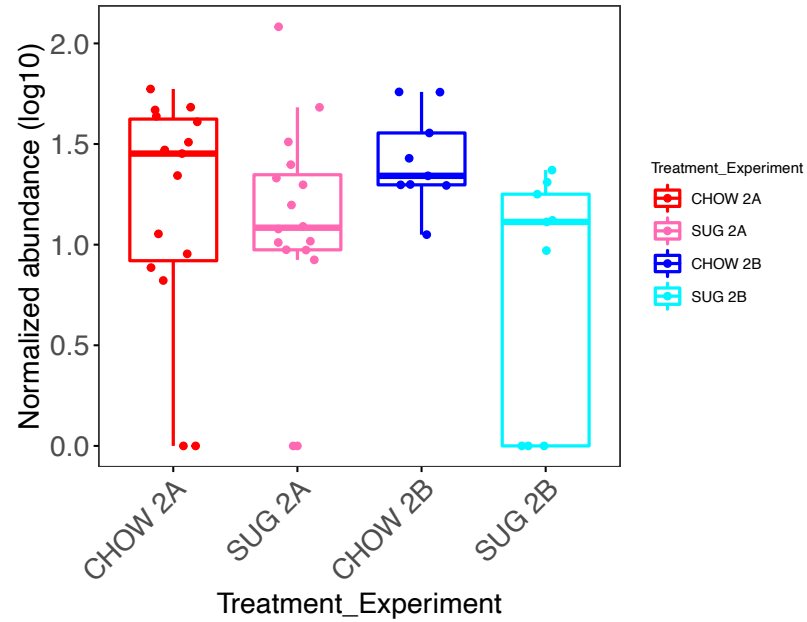

Firmicutes.D.2\_\_Erysipelotrichia.D.3\_\_Erysipelotrichales.D.4\_\_Erysipelotrichaceae.D.5\_\_Dubosiella.D.6\_\_uncultured bacterium  
 Experiment 2A FDR = 0.06238  
 Experiment 2B FDR = 0.06641

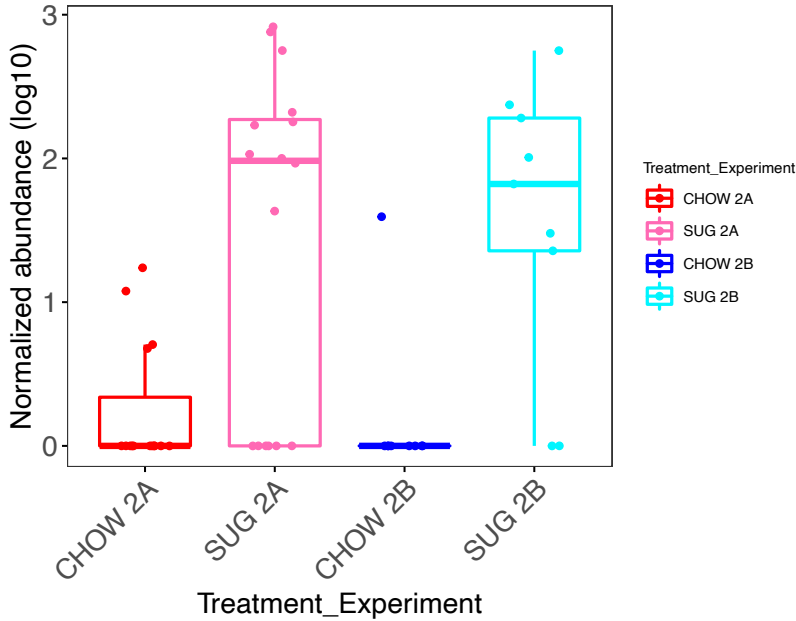

Actinobacteria.D.2\_\_Coriobacteria.D.3\_\_Coriobacteriales.D.4\_\_Atopobiaceae.D.5\_\_Coriobacteriaceae UCG-002.D.6\_\_uncultured bacterium  
 Experiment 2A FDR = 0.0111  
 Experiment 2B FDR = 0.01165

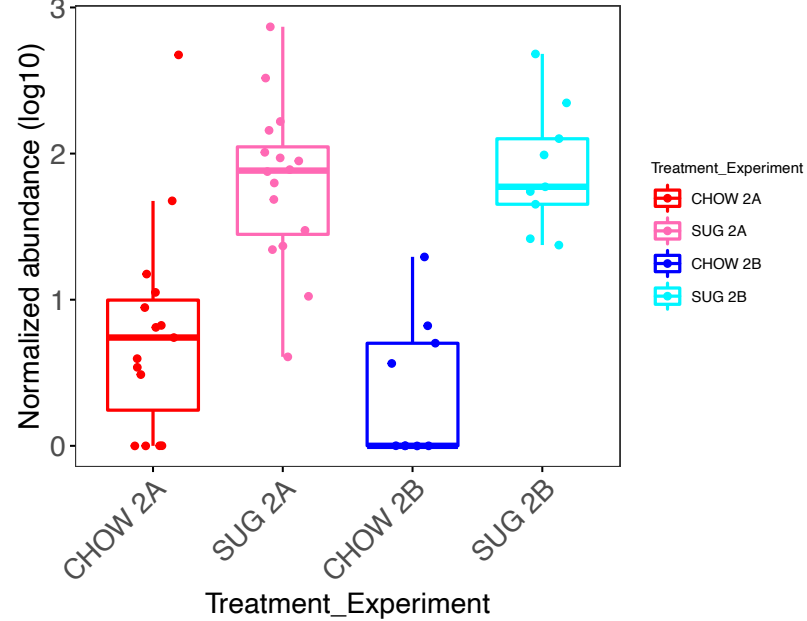

Proteobacteria.D.2\_\_Gammaproteobacteria.D.3\_\_Betaproteobacteriales\_\_  
 Experiment 2A FDR = 0.25084  
 Experiment 2B FDR = 0.01165

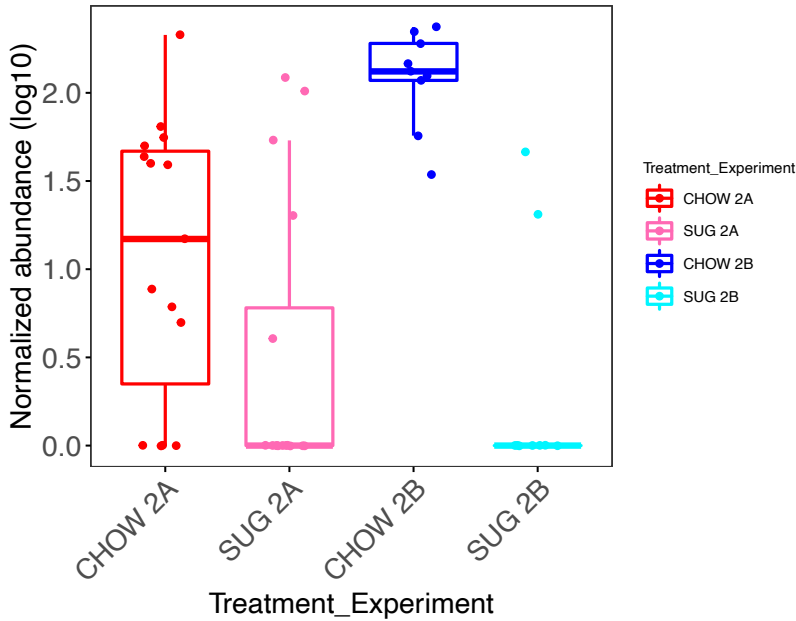

Bacteroidetes.D.2\_\_Bacteroidia.D.3\_\_Bacteroidales.D.4\_\_Muribaculaceae.D.5\_\_Muribaculum.D.6\_\_uncultured bacterium  
 Experiment 2A FDR = 0.86891  
 Experiment 2B FDR = 0.09847

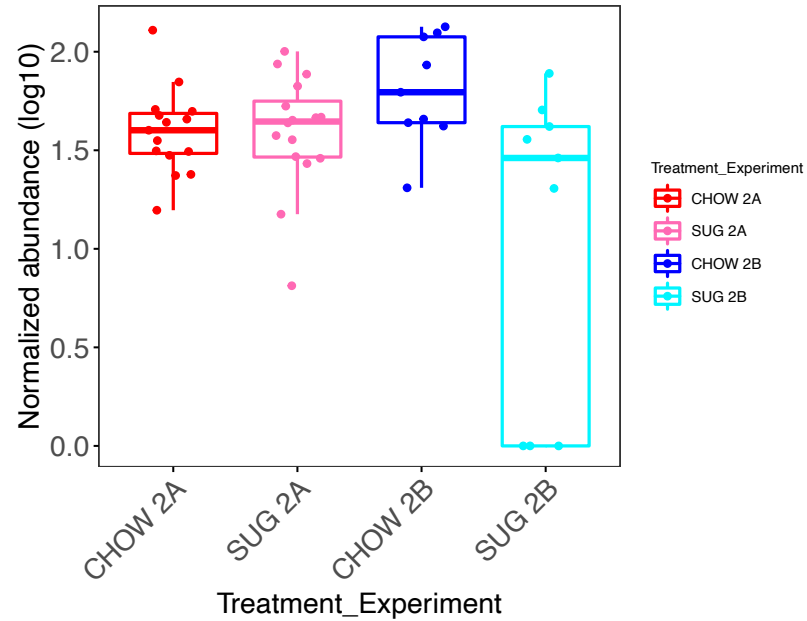



Firmicutes.D.2\_\_Clostridia.D.3\_\_Clostridiales.D.4\_\_Clostridiaceae.1.D.5\_\_Clostridium\_sensu\_stricto.1\_\_  
Experiment 2A FDR = 0.2084  
Experiment 2B FDR = 0.03269

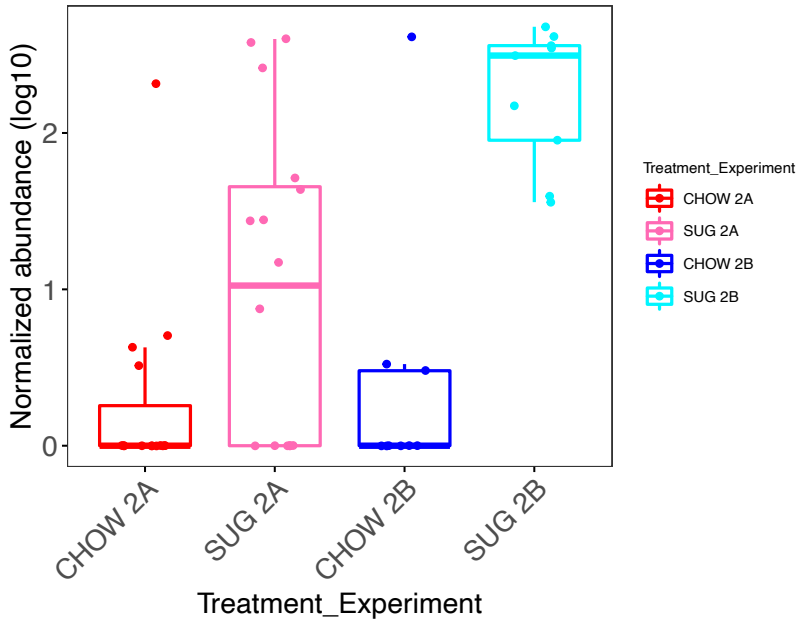

Firmicutes.D.2\_\_Erysipelotrichia.D.3\_\_Erysipelotrichales.D.4\_\_Erysipelotrichaceae.D.5\_\_Erysipelotoclostridium\_\_  
Experiment 2A FDR = 0.90784  
Experiment 2B FDR = 0.09847

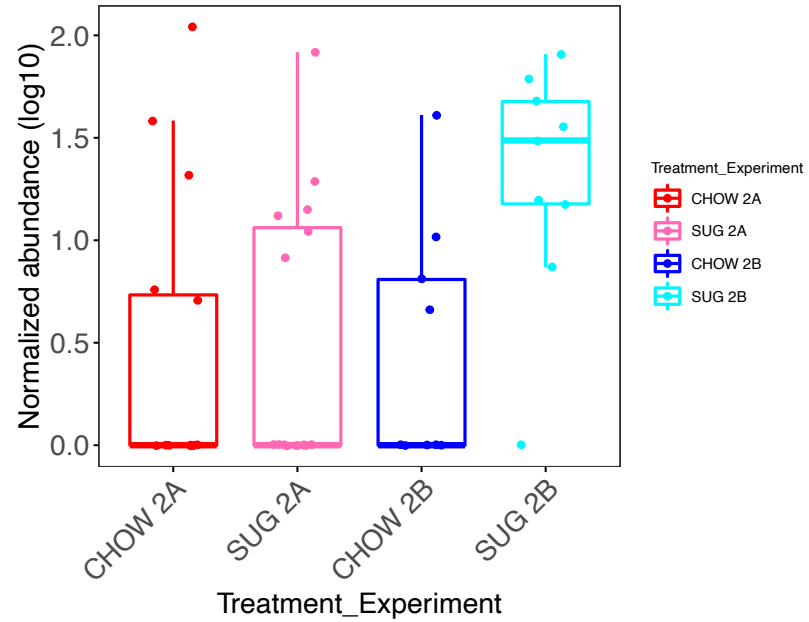

Proteobacteria.D.2\_\_Gammaproteobacteria.D.3\_\_Betaproteobacteriales.D.4\_\_Burkholderiaceae.D.5\_\_Parasutterella.D.6\_\_Burkholderiales.b  
Experiment 2A FDR = 0.26876  
Experiment 2B FDR = 0.0298

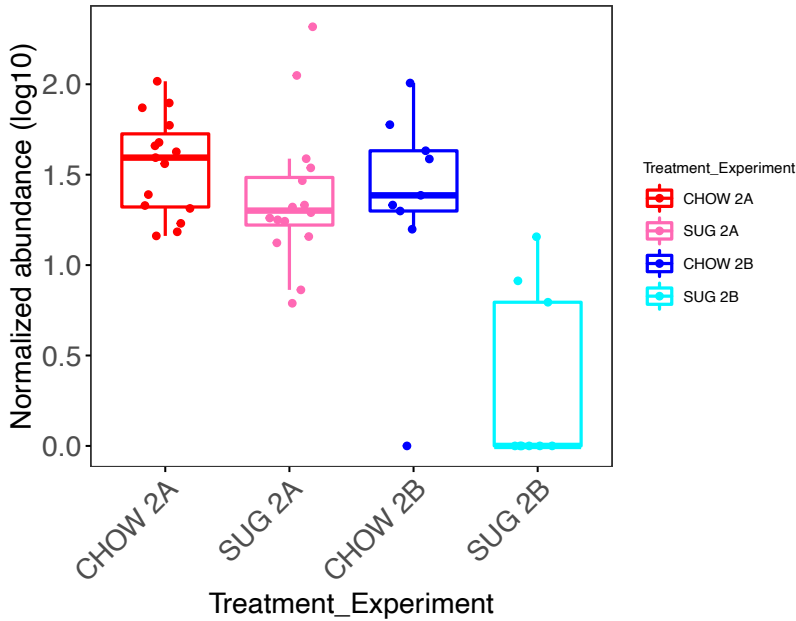

Firmicutes.D.2\_\_Bacilli.D.3\_\_Lactobacillales.D.4\_\_Streptococcaceae.D.5\_\_Lactococcus\_\_  
Experiment 2A FDR = 0.0111  
Experiment 2B FDR = 0.48564

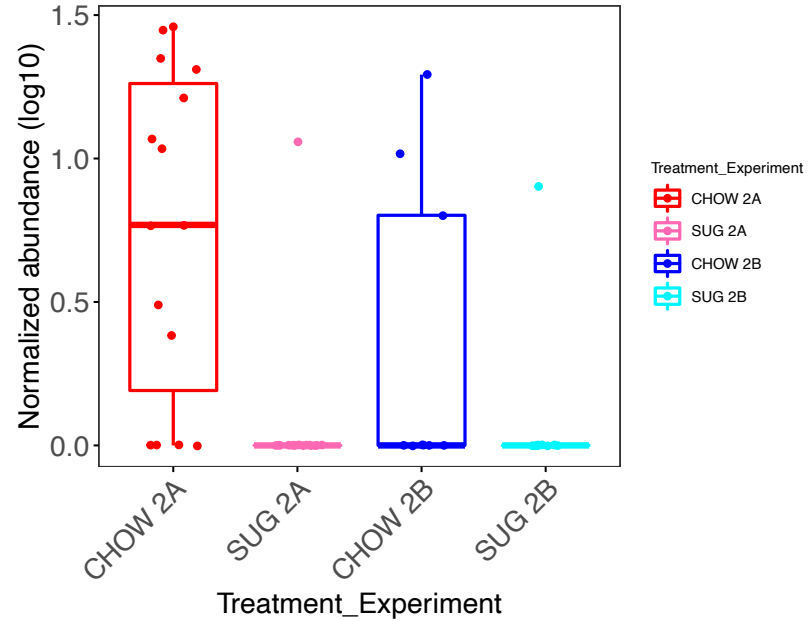

Firmicutes.D.2\_\_Clostridia.D.3\_\_Clostridiales.D.4\_\_Lachnospiraceae.D.5\_\_[Ruminococcus]\_gnavus\_group\_\_  
Experiment 2A FDR = 0.0111  
Experiment 2B FDR = 0.30253

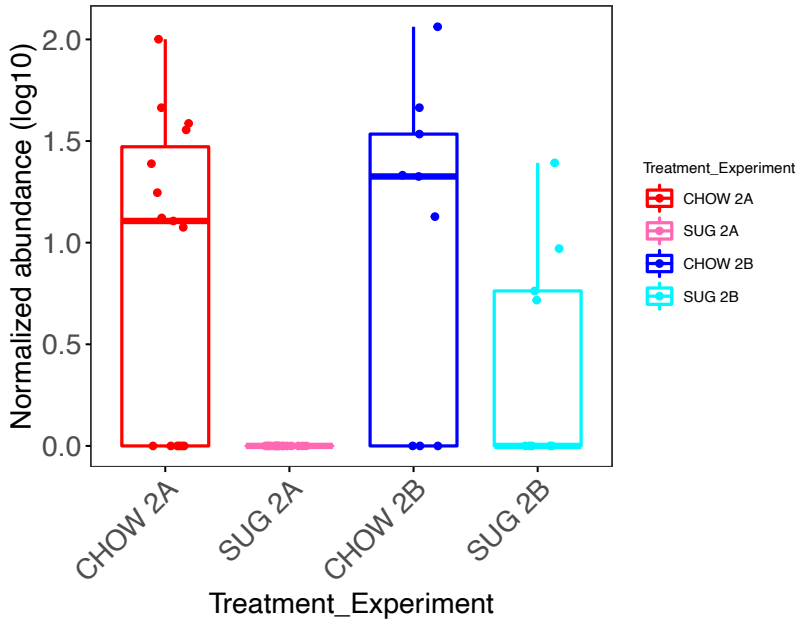

Firmicutes.D.2\_\_Erysipelotrichia.D.3\_\_Erysipelotrichales.D.4\_\_Erysipelotrichaceae\_\_  
Experiment 2A FDR = 0.06238  
Experiment 2B FDR = 1

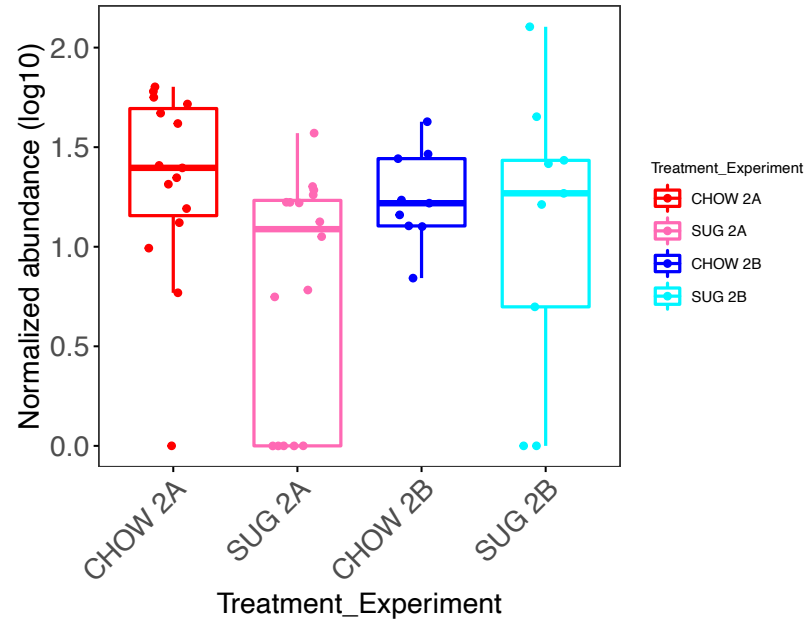

Firmicutes.D.2\_\_Clostridia.D.3\_\_Clostridiales.D.4\_\_Lachnospiraceae.D.5\_\_Lachnospiraceae\_FCS020 group.D.6\_\_mouse gut metagenome  
Experiment 2A FDR = 0.01641  
Experiment 2B FDR = 0.32619

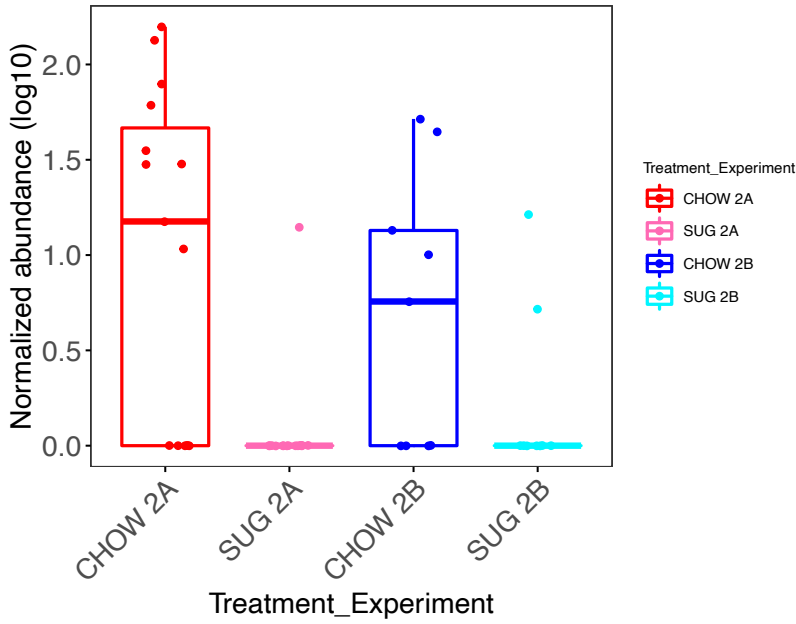

Firmicutes.D.2\_\_Clostridia.D.3\_\_Clostridiales.D.4\_\_Ruminococcaceae.D.5\_\_Intestinimonas\_\_\_  
Experiment 2A FDR = 0.38048  
Experiment 2B FDR = 0.09947

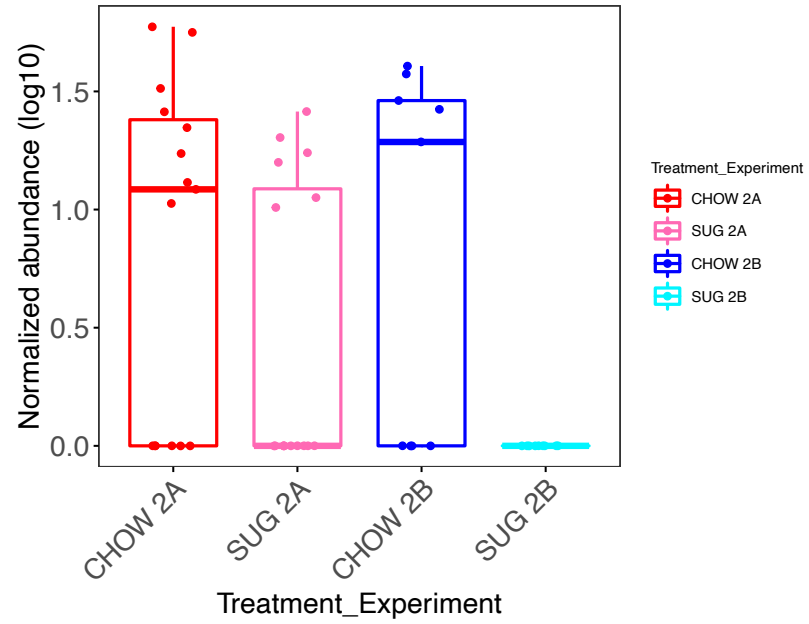

Bacteroidetes.D.2\_\_Bacteroidia.D.3\_\_Flavobacteriales.D.4\_\_Flavobacteriaceae.D.5\_\_uncultured.D.6\_\_gut metagenome  
Experiment 2A FDR = 0.03609  
Experiment 2B FDR = 0.7882

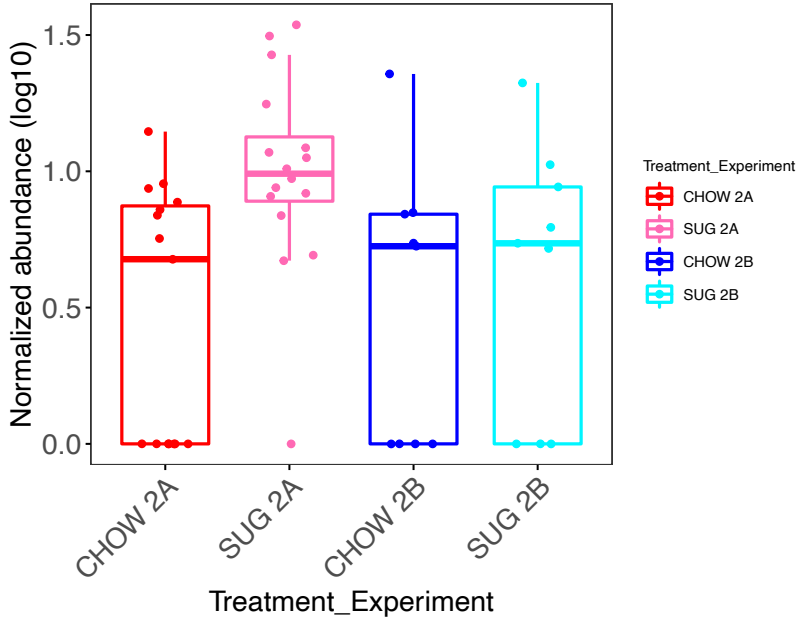

Proteobacteria.D.2\_\_Alphaproteobacteria\_\_\_\_\_  
Experiment 2A FDR = 0.03761  
Experiment 2B FDR = 0.32619

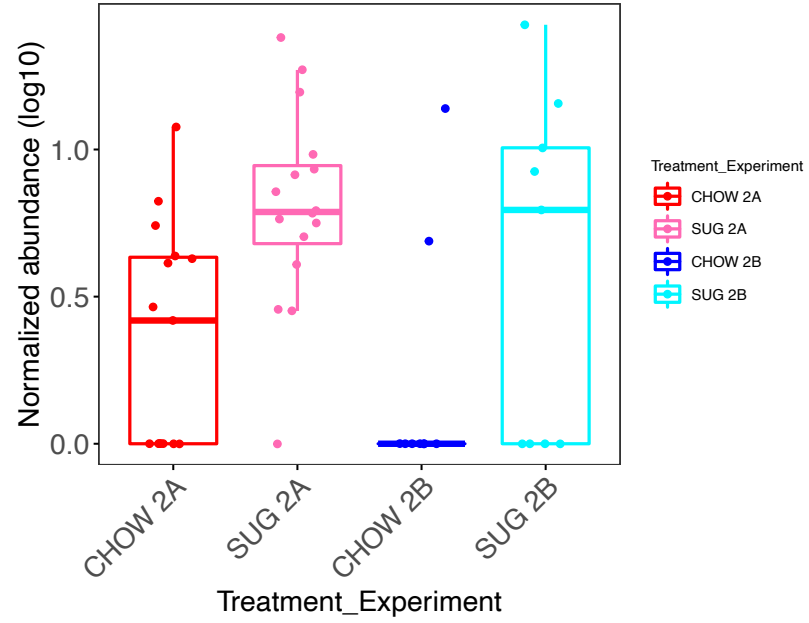

Firmicutes.D.2\_\_Clostridia.D.3\_\_Clostridiales.D.4\_\_Ruminococcaceae.D.5\_\_Ruminiclostridium 5.D.6\_\_gut metagenome  
Experiment 2A FDR = 0.0111  
Experiment 2B FDR = 0.55739

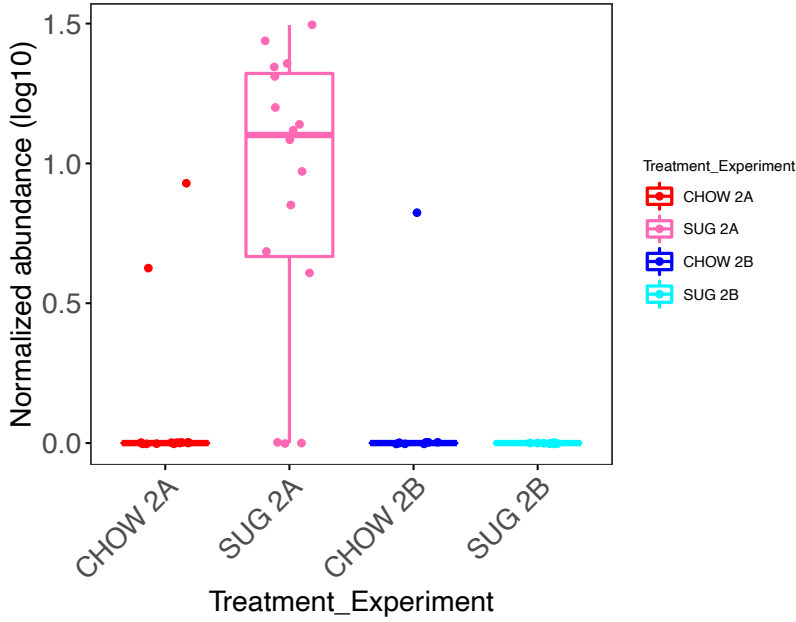

**Supplemental Figure 4 Abundance of the gut microbiota in the SUG vs CHOW groups when analyzed either before (2A) or after (2B) healthy dietary intervention.** CHOW: chow-fed; SUG: sugar; FDR: false discovery rate
